# Supplementary material
Source: Research Square preprint supplement (doi:10.21203/rs.3.rs-9256259/v1)
Supplement: Supplementary file 2 [file bf5aef21664328b714f087cd.xlsx]

## Sheet: Table S1
Table S1. All primers for the DEGs analyzed by RT-qPCR were designed based on specific gene sequences
Gene name	Primer sequences（5’-3’）	Primer sequences（3’-5’）	Product length
HMOX2	ACTTCACCTACTCCGCCTTGG	CTCCCAGTGCTCGCCGTAG	143
HMOX1	GCCAGTGCCACCAAGTTCAAG	TGAGCAGGAAGGCGGTCTTG	112
ACTB	CATCGGCAATGAGCGGTTCC	GTGTTGGCGTAGAGGTCCTTG	144

## Sheet: Table S2
Table S2. Amplicon and primer design for the target region of BSAS
ID	Forward Primer Sequences	Reverse Primer Sequences	INSERT SEQUENCE	REF	CHROM	STRAND	START	END	REF_STRAND	REF_SQUENCE	INTEREST_STRAND	INTEREST_SQUENCE	REF	CHROM	START	END	Gene
1	GGGGTAAAATTATATTGTTGTATAGATTTTTAGA	CTATTTATCCCCGAAACGAATCAC	AGTTTTTTTTTTTTACGTTTTGTTTTAAATAGATTGTTTTTTACGGGTTATATGATCGTTTTTTTTTCGTTTTCGTAGGTTAGGGGCGGGCGGGGCGTCGGTTTTCGCGGGTGTTGTAATTTCGGGTTTTAAAGTGGGGAAAGGTTAGCGGGCGGCGGTTAC	ARS-UCD2.0	chr5	+	73623246	73623407	+	GGGGCAAAATCACACTGCTGCACAGATTTCCAGAAGTTTTTTTTTTTTACGTCTTGTTTTAAATAGATTGTTTTCCACGGGTCATATGACCGCTCCTCCTCCGCCCCCGCAGGCCAGGGGCGGGCGGGGCGCCGGCTCCCGCGGGTGTTGCAACTTCGGGCCCCAAAGTGGGGAAAGGCCAGCGGGCGGCGGCCACGTGACTCGCCCCGGGGATAAATAG	+	GGGGCAAAATCACACTGCTGCACAGATTTCCAGAAGTTTTTTTTTTTTACGTCTTGTTTTAAATAGATTGTTTTCCACGGGTCATATGACCGCTCCTCCTCCGCCCCCGCAGGCCAGGGGCGGGCGGGGCGCCGGCTCCCGCGGGTGTTGCAACTTCGGGCCCCAAAGTGGGGAAAGGCCAGCGGGCGGCGGCCACGTGACTCGCCCCGGGGATAAATAG	ARS-UCD2.0	chr5	73623212	73623431	HMOX1
2	TTAAAGTGGGGAAAGGTTAGCGGG	AACTACGAACGCTCCATCCTACGA	CGGCGGTTACGTGATTCGTTTCGGGGATAAATAGACGGCGAAGTTGGGATTCGGTATCGTAGTTTTTTTATTTTTTCGATTTATTTTTGGGTCGTCGGAGTCGGAGTTTTCGGAGTCGGAGTTTTCGGAGTTAGTATCGATTTTATATTTATATAG	ARS-UCD2.0	chr5	+	73623398	73623553	+	CCAAAGTGGGGAAAGGCCAGCGGGCGGCGGCCACGTGACTCGCCCCGGGGATAAATAGACGGCGAAGCTGGGATTCGGCACCGTAGCCCTCCCACCTCCTCGACCCACTTCTGGGCCGTCGGAGCCGGAGTTCTCGGAGCCGGAGTTCTCGGAGCCAGCATCGACCCCACACCTACACAGCCGCAGGATGGAGCGCCCGCAGCC	+	CCAAAGTGGGGAAAGGCCAGCGGGCGGCGGCCACGTGACTCGCCCCGGGGATAAATAGACGGCGAAGCTGGGATTCGGCACCGTAGCCCTCCCACCTCCTCGACCCACTTCTGGGCCGTCGGAGCCGGAGTTCTCGGAGCCGGAGTTCTCGGAGCCAGCATCGACCCCACACCTACACAGCCGCAGGATGGAGCGCCCGCAGCC	ARS-UCD2.0	chr5	73623374	73623577	HMOX1
3	TCGGAGTTTTCGGAGTTAGTATCGAT	ACTCCTCCTAACACCAAAACCCCA	TTTATATTTATATAGTCGTAGGATGGAGCGTTCGTAGTTCGATAGTAGGTAAGTGCGGGGCGAGGGATCGGTTTTTTTCGGGTAGGGTAGTTTTTTTTTTTCGTAGAGTTTTCGAGATCGAGTCGGGAAGTAGGAAGCGATTTCGTTGAACGGGCGACGGTTATT	ARS-UCD2.0	chr5	+	73623539	73623703	+	CCGGAGTTCTCGGAGCCAGCATCGACCCCACACCTACACAGCCGCAGGATGGAGCGCCCGCAGCCCGACAGCAGGCAAGTGCGGGGCGAGGGACCGGCCTCTCCCGGGCAGGGCAGCTCCCTCTTCCCGCAGAGCTCCCGAGACCGAGCCGGGAAGCAGGAAGCGACCTCGCTGAACGGGCGACGGTCACTTGGGGCTTTGGTGTTAGGAGGAGC	+	CCGGAGTTCTCGGAGCCAGCATCGACCCCACACCTACACAGCCGCAGGATGGAGCGCCCGCAGCCCGACAGCAGGCAAGTGCGGGGCGAGGGACCGGCCTCTCCCGGGCAGGGCAGCTCCCTCTTCCCGCAGAGCTCCCGAGACCGAGCCGGGAAGCAGGAAGCGACCTCGCTGAACGGGCGACGGTCACTTGGGGCTTTGGTGTTAGGAGGAGC	ARS-UCD2.0	chr5	73623513	73623727	HMOX1
4	AGAAATAGATGGGATAGGAGGAGA	CGTACGCACGCAACGAAAACG	ACGTACGAGGTAAGTTTGAAGCGGTGGTGATAAAGGGTAAGAAGAGTTCGGAGAGGCGTTTATGAATATTTTTTTTTACGAAGGGAATAATTTTTTTGTTCGTATTTCGATTTTCGTTATAGATTAGCGCGCGAGGACGGTTGTCGCGTGTTCGTCGTAGGGGCGTGTTTTGCGTAGGTTT	ARS-UCD2.0	chr25	+	3625821	3626001	+	AGAAACAGATGGGACAGGAGGAGAACGCACGAGGTAAGCCTGAAGCGGTGGTGATAAAGGGCAAGAAGAGCCCGGAGAGGCGTTCATGAACACCCCTTCTCACGAAGGGAACAACTCTCCTGTCCGCACTTCGACTTCCGCCACAGACCAGCGCGCGAGGACGGCTGCCGCGTGCCCGCCGCAGGGGCGTGTCCTGCGCAGGCCCCGCCCCCGCTGCGTGCGCACG	+	AGAAACAGATGGGACAGGAGGAGAACGCACGAGGTAAGCCTGAAGCGGTGGTGATAAAGGGCAAGAAGAGCCCGGAGAGGCGTTCATGAACACCCCTTCTCACGAAGGGAACAACTCTCCTGTCCGCACTTCGACTTCCGCCACAGACCAGCGCGCGAGGACGGCTGCCGCGTGCCCGCCGCAGGGGCGTGTCCTGCGCAGGCCCCGCCCCCGCTGCGTGCGCACG	ARS-UCD2.0	chr25	3625797	3626022	HMOX2
5	GTAGGGGCGTGTTTTGCGTAGG	TCCCGAAAACCAAAAATAACCAAA	TTTCGTTTTCGTTGCGTGCGTACGTCGGGTTGTTTGTTAGGTTGCGGCGGTCGCGGCGTTAGAGTTAGTCGTTGATTTACGCGCGGACGCGGTGTTGACGGACGTTGGAGCGGATTTGCGGCGGGTGAGTGTCGGTGTTTTGTAGGGTTTTTTTCGGGGTTTTTTCGCGAG	ARS-UCD2.0	chr25	+	3625999	3626169	+	GCAGGGGCGTGTCCTGCGCAGGCCCCGCCCCCGCTGCGTGCGCACGTCGGGCTGCTTGCTAGGCTGCGGCGGTCGCGGCGCCAGAGCCAGTCGCTGACTTACGCGCGGACGCGGTGCTGACGGACGCTGGAGCGGACTTGCGGCGGGTGAGTGTCGGTGCCCTGCAGGGCCTTCCTCGGGGCTTCTCCGCGAGCCTGGCCACCCCTGGCTCTCGGGA	+	GCAGGGGCGTGTCCTGCGCAGGCCCCGCCCCCGCTGCGTGCGCACGTCGGGCTGCTTGCTAGGCTGCGGCGGTCGCGGCGCCAGAGCCAGTCGCTGACTTACGCGCGGACGCGGTGCTGACGGACGCTGGAGCGGACTTGCGGCGGGTGAGTGTCGGTGCCCTGCAGGGCCTTCCTCGGGGCTTCTCCGCGAGCCTGGCCACCCCTGGCTCTCGGGA	ARS-UCD2.0	chr25	3625977	3626193	HMOX2
6	GATTTGCGGCGGGTGAGTGTC	CCGAACCTCTAAAACGCCGTCTAA	GGTGTTTTGTAGGGTTTTTTTCGGGGTTTTTTCGCGAGTTTGGTTATTTTTGGTTTTCGGGAATTCGGTTCGGTCGATACGGTTCGTCGTTTTTCGGCGTTCGTTTGAGGAAGTTCGGACGGGTCGGGGCGAGGGGCGGTTAGGGGTCGGGAGGGAGGATTTCGTTTT	ARS-UCD2.0	chr25	+	3626132	3626299	+	GACTTGCGGCGGGTGAGTGTCGGTGCCCTGCAGGGCCTTCCTCGGGGCTTCTCCGCGAGCCTGGCCACCCCTGGCTCTCGGGAACTCGGCTCGGCCGACACGGCCCGCCGCTCCCCGGCGCCCGCCTGAGGAAGCCCGGACGGGCCGGGGCGAGGGGCGGCCAGGGGCCGGGAGGGAGGACCTCGCTTCCCAGACGGCGTTTCAGAGGCCCGG	+	GACTTGCGGCGGGTGAGTGTCGGTGCCCTGCAGGGCCTTCCTCGGGGCTTCTCCGCGAGCCTGGCCACCCCTGGCTCTCGGGAACTCGGCTCGGCCGACACGGCCCGCCGCTCCCCGGCGCCCGCCTGAGGAAGCCCGGACGGGCCGGGGCGAGGGGCGGCCAGGGGCCGGGAGGGAGGACCTCGCTTCCCAGACGGCGTTTCAGAGGCCCGG	ARS-UCD2.0	chr25	3626111	3626323	HMOX2
7	CGAGGGGCGGTTAGGGGTC	ACTACAAACCCGACGAAAACGCCA	GGGAGGGAGGATTTCGTTTTTTAGACGGCGTTTTAGAGGTTCGGGGAGGGAGGTTTGAGTCGTTCGTAGGCGTTGGTTCGCGTGGGGTATATTTTTTGTCGGCGTTTTTTGCGTTTTATAGGAGGTGATTCGATTTTCGGGTCGTCGCGGGAGGATT	ARS-UCD2.0	chr25	+	3626280	3626436	+	CGAGGGGCGGCCAGGGGCCGGGAGGGAGGACCTCGCTTCCCAGACGGCGTTTCAGAGGCCCGGGGAGGGAGGCCTGAGCCGCTCGTAGGCGTTGGTCCGCGTGGGGCACACCCCCTGCCGGCGTCTCCTGCGCCCCACAGGAGGTGACCCGACCCCCGGGTCGCCGCGGGAGGACTTGGCGTTCCCGCCGGGCCTGCAGC	+	CGAGGGGCGGCCAGGGGCCGGGAGGGAGGACCTCGCTTCCCAGACGGCGTTTCAGAGGCCCGGGGAGGGAGGCCTGAGCCGCTCGTAGGCGTTGGTCCGCGTGGGGCACACCCCCTGCCGGCGTCTCCTGCGCCCCACAGGAGGTGACCCGACCCCCGGGTCGCCGCGGGAGGACTTGGCGTTCCCGCCGGGCCTGCAGC	ARS-UCD2.0	chr25	3626261	3626460	HMOX2
8	TTTGAGTCGTTCGTAGGCGTTGG	CGACTCTCGAACGCCAAACTAAATCT	TTCGCGTGGGGTATATTTTTTGTCGGCGTTTTTTGCGTTTTATAGGAGGTGATTCGATTTTCGGGTCGTCGCGGGAGGATTTGGCGTTTTCGTCGGGTTTGTAGTTTTTGGTTTTTTAGTTAGTACGTCGGTTTATTTTGGGTCGGCGAGGATTT	ARS-UCD2.0	chr25	+	3626356	3626510	+	CCTGAGCCGCTCGTAGGCGTTGGTCCGCGTGGGGCACACCCCCTGCCGGCGTCTCCTGCGCCCCACAGGAGGTGACCCGACCCCCGGGTCGCCGCGGGAGGACTTGGCGTTCCCGCCGGGCCTGCAGCCTCTGGCCCCCCAGCCAGCACGTCGGTCCACTTTGGGCCGGCGAGGACCCAGACCTAGCTTGGCGTCCGAGAGTCG	+	CCTGAGCCGCTCGTAGGCGTTGGTCCGCGTGGGGCACACCCCCTGCCGGCGTCTCCTGCGCCCCACAGGAGGTGACCCGACCCCCGGGTCGCCGCGGGAGGACTTGGCGTTCCCGCCGGGCCTGCAGCCTCTGGCCCCCCAGCCAGCACGTCGGTCCACTTTGGGCCGGCGAGGACCCAGACCTAGCTTGGCGTCCGAGAGTCG	ARS-UCD2.0	chr25	3626333	3626536	HMOX2
9	TACGTCGGTTTATTTTGGGTCGGC	CCAACTACCCCTAACGTTACTCCCT	GAGGATTTAGATTTAGTTTGGCGTTCGAGAGTCGTATTCGGGTTGTTGGCGCGGATCGGGTTTTGATTTTTTTTTTTTTGATTTATTTTTGTTTAAAGGGTTTTTTGAGTTATTGTCGTGATTTTTTTAATGATTCGCGGTCGTTAGGTTGTA	ARS-UCD2.0	chr25	+	3626503	3626655	+	CACGTCGGTCCACTTTGGGCCGGCGAGGACCCAGACCTAGCTTGGCGTCCGAGAGTCGTACCCGGGCTGTTGGCGCGGACCGGGCTCTGACCTTCCTCCTCCTGACTCACCTCTGCCTAAAGGGCCCTTTGAGTCACTGTCGTGACTTCCCTAATGACCCGCGGCCGCCAGGTTGCAAGGGAGCAACGTCAGGGGCAGCTGG	+	CACGTCGGTCCACTTTGGGCCGGCGAGGACCCAGACCTAGCTTGGCGTCCGAGAGTCGTACCCGGGCTGTTGGCGCGGACCGGGCTCTGACCTTCCTCCTCCTGACTCACCTCTGCCTAAAGGGCCCTTTGAGTCACTGTCGTGACTTCCCTAATGACCCGCGGCCGCCAGGTTGCAAGGGAGCAACGTCAGGGGCAGCTGG	ARS-UCD2.0	chr25	3626479	3626680	HMOX2
10	AGGTGTTTAATGAATTGGATTAGGTTGGT	GAACGCGCAAAACACGTAAAACCT	TTTTTGTTGGTTAAAGAAATTTTGGAGGACGGGTTTTTTGCGTACGACGGGTTTTTTGCGTACGGTAGATTGTTTACGTAGGACGGGTTTTTCGTGTACGACGGGAAAGGAGATTTGCGGAAGTGTTTTTATTACGTTGTTTAGTTAGATAAAGGT	ARS-UCD2.0	chr25	+	3653172	3653327	+	AGGTGTTCAATGAACTGGACCAGGCTGGCTCCTTGCTGGCCAAAGAAACCCTGGAGGACGGGCTCCCTGCGCACGACGGGCTTCCTGCGCACGGCAGACTGCCCACGCAGGACGGGCTTCCCGTGCACGACGGGAAAGGAGACTTGCGGAAGTGCCCCTACTACGCTGCTCAGCTAGACAAAGGTAGGCCTCACGTGTCCTGCGCGCCC	+	AGGTGTTCAATGAACTGGACCAGGCTGGCTCCTTGCTGGCCAAAGAAACCCTGGAGGACGGGCTCCCTGCGCACGACGGGCTTCCTGCGCACGGCAGACTGCCCACGCAGGACGGGCTTCCCGTGCACGACGGGAAAGGAGACTTGCGGAAGTGCCCCTACTACGCTGCTCAGCTAGACAAAGGTAGGCCTCACGTGTCCTGCGCGCCC	ARS-UCD2.0	chr25	3653143	3653351	HMOX2
11	TGCGGAAGTGTTTTTATTACGTTGTTTAGTTAG	CCACGCTAACGACCAACAAAAACT	ATAAAGGTAGGTTTTACGTGTTTTGCGCGTTCGGGGTAGGTGTGTTGGTTTTTATTTACGGTATGTTTTTTCGGTGTTGTTGCGTAGGTGTTTTGGAAGGTAGTAGTTGTTTTTTTGGAGTAGTTTTGGTTGTGTTGCGAAGGTTCGGTTTTT	ARS-UCD2.0	chr25	+	3653320	3653472	+	TGCGGAAGTGCCCCTACTACGCTGCTCAGCTAGACAAAGGTAGGCCTCACGTGTCCTGCGCGCCCGGGGCAGGTGTGTTGGCCCCCACTCACGGCATGTCCCCTCGGTGCTGCTGCGCAGGTGCCCTGGAAGGCAGCAGCTGCCCCTTTGGAGCAGCCCTGGCTGTGCTGCGAAGGCCCGGCCTCCAGTTCCTGCTGGCCGCCAGCGTGG	+	TGCGGAAGTGCCCCTACTACGCTGCTCAGCTAGACAAAGGTAGGCCTCACGTGTCCTGCGCGCCCGGGGCAGGTGTGTTGGCCCCCACTCACGGCATGTCCCCTCGGTGCTGCTGCGCAGGTGCCCTGGAAGGCAGCAGCTGCCCCTTTGGAGCAGCCCTGGCTGTGCTGCGAAGGCCCGGCCTCCAGTTCCTGCTGGCCGCCAGCGTGG	ARS-UCD2.0	chr25	3653287	3653496	HMOX2
12	GTTTTGGTTGTGTTGCGAAGGTTC	CTTTTATTAATTACTTATTTTCTCAAAACCAACA	GGTTTTTAGTTTTTGTTGGTCGTTAGCGTGGTTTTGGTCGTCGGTTTTTTGGTTTGGTATTTTATGTGAAGGATTTATCGTTTTATATTGCGTTGTTTTTTGTTTATCGGTTCGTTTTGTTTTTATTTACGATTAAATTGTTATTTTAGGTGATTTTTTTAA	ARS-UCD2.0	chr25	+	3653466	3653627	+	GCCCTGGCTGTGCTGCGAAGGCCCGGCCTCCAGTTCCTGCTGGCCGCCAGCGTGGCCCTGGCCGCCGGCCTCCTGGCTTGGTACTCCATGTGAAGGACCCACCGTTCCACACTGCGCTGCCTCCTGTCCACCGGCCCGCCCTGCCTCCACCCACGACCAAACTGCCACCTCAGGTGACTTTCCTAATGCTGGCCTTGAGAAAACAAGCAACCAATAAAAG	+	GCCCTGGCTGTGCTGCGAAGGCCCGGCCTCCAGTTCCTGCTGGCCGCCAGCGTGGCCCTGGCCGCCGGCCTCCTGGCTTGGTACTCCATGTGAAGGACCCACCGTTCCACACTGCGCTGCCTCCTGTCCACCGGCCCGCCCTGCCTCCACCCACGACCAAACTGCCACCTCAGGTGACTTTCCTAATGCTGGCCTTGAGAAAACAAGCAACCAATAAAAG	ARS-UCD2.0	chr25	3653442	3653661	HMOX2
13	TGGGGTAGTTGTGTTGTTGTTTTTAGA	AACGAACTACACCGAATCACCACG	TGGGTTTTTTTCGTCGTATAGTTAGGTGGAGCGTGAATTTGGCGTTTTTTAGGATTAGATTTTTCGGGTTGACGAACGTAGAGGTAGTGGGTATCGATTGGTTTATATGTGTTATTTTTTTTAGTTCGGTAGAGTTTGGAGTGGGTTGGAGGTAGTTTGTTCG	ARS-UCD2.0	chr25	+	3649362	3649524	+	TGGGGCAGCTGTGCTGCTGTTCCCAGATGGGCTTCCCCCGTCGCACAGTCAGGTGGAGCGTGAACTTGGCGCCTTCCAGGACCAGATCTCCCGGGCTGACGAACGCAGAGGCAGTGGGCATCGACTGGCCTACATGTGTCACTTCTTCTAGCTCGGCAGAGTCTGGAGTGGGCTGGAGGCAGTCTGCTCGCGTGGTGACTCGGTGCAGCTCGTC	+	TGGGGCAGCTGTGCTGCTGTTCCCAGATGGGCTTCCCCCGTCGCACAGTCAGGTGGAGCGTGAACTTGGCGCCTTCCAGGACCAGATCTCCCGGGCTGACGAACGCAGAGGCAGTGGGCATCGACTGGCCTACATGTGTCACTTCTTCTAGCTCGGCAGAGTCTGGAGTGGGCTGGAGGCAGTCTGCTCGCGTGGTGACTCGGTGCAGCTCGTC	ARS-UCD2.0	chr25	3649335	3649548	HMOX2
14	TGGGTATCGATTGGTTTATATGTGT	AAACAACAATACGACAACTCTCAAT	TATTTTTTTTAGTTCGGTAGAGTTTGGAGTGGGTTGGAGGTAGTTTGTTCGCGTGGTGATTCGGTGTAGTTCGTTAGGGGTTTTTGGAGTCGTTTCGAGGGGATGTTTTTTGTATAAGGGCGTTCGTTTTTAATAGGTAGGTTGGTTGGTTTCGATGCGTTCGTTGTTAT	ARS-UCD2.0	chr25	+	3649474	3649643	+	TGGGCATCGACTGGCCTACATGTGTCACTTCTTCTAGCTCGGCAGAGTCTGGAGTGGGCTGGAGGCAGTCTGCTCGCGTGGTGACTCGGTGCAGCTCGTCAGGGGCCTTTGGAGCCGCCCCGAGGGGATGCTCTCTGCACAAGGGCGCCCGCCTCTAACAGGCAGGCTGGCTGGTTCCGATGCGCTCGCTGCCACACTGAGAGCTGCCGCACTGCTGCTT	+	TGGGCATCGACTGGCCTACATGTGTCACTTCTTCTAGCTCGGCAGAGTCTGGAGTGGGCTGGAGGCAGTCTGCTCGCGTGGTGACTCGGTGCAGCTCGTCAGGGGCCTTTGGAGCCGCCCCGAGGGGATGCTCTCTGCACAAGGGCGCCCGCCTCTAACAGGCAGGCTGGCTGGTTCCGATGCGCTCGCTGCCACACTGAGAGCTGCCGCACTGCTGCTT	ARS-UCD2.0	chr25	3649449	3649668	HMOX2
15	AGGTAGGTTGGTTGGTTTCGATGC	ACACTAAAATCAATACTAACGATAAACCT	GTTCGTTGTTATATTGAGAGTTGTCGTATTGTTGTTTTTTTTATTTAAGTTATATTTTTTTGTTATTTTATGTTTTACGTAATTTTTGATATAATTTTAAAAATATAGAAAAGTTGTAAGAACGGTACGTAGAATTTTTGTGTATGTTTTATTT	ARS-UCD2.0	chr25	+	3649632	3649785	+	AGGCAGGCTGGCTGGTTCCGATGCGCTCGCTGCCACACTGAGAGCTGCCGCACTGCTGCTTTTTTTATTTAAGTCATATTCCTTTGTTATTTTATGTTTTACGTAACTTTTGATATAATCTCAAAAATACAGAAAAGTTGTAAGAACGGTACGTAGAATCCTTGTGTATGTTTCATCCAGGTTCACCGTCAGCACTGACTCTAGTGC	+	AGGCAGGCTGGCTGGTTCCGATGCGCTCGCTGCCACACTGAGAGCTGCCGCACTGCTGCTTTTTTTATTTAAGTCATATTCCTTTGTTATTTTATGTTTTACGTAACTTTTGATATAATCTCAAAAATACAGAAAAGTTGTAAGAACGGTACGTAGAATCCTTGTGTATGTTTCATCCAGGTTCACCGTCAGCACTGACTCTAGTGC	ARS-UCD2.0	chr25	3649608	3649814	HMOX2
16	AGAACGGTACGTAGAATTTTTGTGTATGTT	AACACACACTCGCATAATCACAA	TTATTTAGGTTTATCGTTAGTATTGATTTTAGTGTTTTATTTGTATGTTTTTTTCGTTGTAGTGTATGTGTTTGTATATATATATATATATATATATACGCGCGCGCGCGCGCGTATATATTTTGTTTTTGAATTATTTGATAAGTTGTAGGTAATATGTTTTATTAT	ARS-UCD2.0	chr25	+	3649780	3649947	+	AGAACGGTACGTAGAATCCTTGTGTATGTTTCATCCAGGTTCACCGTCAGCACTGACTCTAGTGCTTCACTTGTATGTCCCCCCCGCTGCAGTGTATGTGCCTGTACACACACACACACACACACACACGCGCGCGCGCGCGCGCACACACTCTGTCTCTGAACCATTTGACAAGTTGCAGGTAATATGCCCCATTACTTGTGACTATGCGAGTGTGTGTT	+	AGAACGGTACGTAGAATCCTTGTGTATGTTTCATCCAGGTTCACCGTCAGCACTGACTCTAGTGCTTCACTTGTATGTCCCCCCCGCTGCAGTGTATGTGCCTGTACACACACACACACACACACACACGCGCGCGCGCGCGCGCACACACTCTGTCTCTGAACCATTTGACAAGTTGCAGGTAATATGCCCCATTACTTGTGACTATGCGAGTGTGTGTT	ARS-UCD2.0	chr25	3649750	3649970	HMOX2
17	TGTTTTTGAATTATTTGATAAGTTGTAGGT	TTCATAAAAATAAAACTCTACTATCACGAAAC	AATATGTTTTATTATTTGTGATTATGCGAGTGTGTGTTTTTTAAAATAAGGATATTTTTGTAAATAAGTATAGTGTAGTTATAAAAATTAGTAAGTTTAGTATTAATATAGTGTTATTATTATTGTTTATATTTATATTTTGTTTAGTGTAGATACG	ARS-UCD2.0	chr25	+	3649933	3650089	+	TGTCTCTGAACCATTTGACAAGTTGCAGGTAATATGCCCCATTACTTGTGACTATGCGAGTGTGTGTTTCCTAAAACAAGGACATTCTTGTAAATAAGCACAGTGCAGTTATAAAAATCAGCAAGTTCAGCATCAATACAGTGCTATTACCACTGTCCATATTCACATTTTGTCCAGTGCAGATACGGTCCCGTGACAGCAGAGCTTTATTTTTATGAA	+	TGTCTCTGAACCATTTGACAAGTTGCAGGTAATATGCCCCATTACTTGTGACTATGCGAGTGTGTGTTTCCTAAAACAAGGACATTCTTGTAAATAAGCACAGTGCAGTTATAAAAATCAGCAAGTTCAGCATCAATACAGTGCTATTACCACTGTCCATATTCACATTTTGTCCAGTGCAGATACGGTCCCGTGACAGCAGAGCTTTATTTTTATGAA	ARS-UCD2.0	chr25	3649903	3650121	HMOX2
18	GTTTATATTTATATTTTGTTTAGTGTAGATACG	ATCCAACCCCTCTAAAATCTCCA	GTTTCGTGATAGTAGAGTTTTATTTTTATGAAAATTTTTTCGAGGTTTGTGGCGTTTTTTTGTGGTGTTGTTTAGGGCGAGTAGAATCGGCGGGTATTTGGGGATTGATTGTCGTAGGCGTTATATTTTTTGTTTTTTTGTTTTCGTAGGATTAGAGGCGTGAGAGTAGTAGTTATGTTAGCGGAAT	ARS-UCD2.0	chr25	+	3650090	3650276	+	GTCCATATTCACATTTTGTCCAGTGCAGATACGGTCCCGTGACAGCAGAGCTTTATTTTTATGAAAACTTCCCCGAGGCCTGTGGCGCCTCCTTGTGGTGTTGCTCAGGGCGAGCAGAACCGGCGGGCACCTGGGGACTGACTGCCGCAGGCGCCACATCCCCTGCTCCCCTGTCTCCGCAGGACCAGAGGCGTGAGAGCAGCAGCCATGTCAGCGGAACTGGAGACCTCAGAGGGGTTGGAT	+	GTCCATATTCACATTTTGTCCAGTGCAGATACGGTCCCGTGACAGCAGAGCTTTATTTTTATGAAAACTTCCCCGAGGCCTGTGGCGCCTCCTTGTGGTGTTGCTCAGGGCGAGCAGAACCGGCGGGCACCTGGGGACTGACTGCCGCAGGCGCCACATCCCCTGCTCCCCTGTCTCCGCAGGACCAGAGGCGTGAGAGCAGCAGCCATGTCAGCGGAACTGGAGACCTCAGAGGGGTTGGAT	ARS-UCD2.0	chr25	3650057	3650299	HMOX2
19	GCGTGAGAGTAGTAGTTATGTTAGCGG	ACCTCCCTACGTAAACCGAAAACG	AATTGGAGATTTTAGAGGGGTTGGATGAGTCGGAGAAAAAGATTTTCGGGGTTTTAGAGAAGGAAAATTATATTAGGTGAGTGGTGGTAGTCGTGGTGTAGTTAGGTCGTGTTGTCGGGTTTTAGGATGTTTCGTGTTTCGTCGTCGTTTCGTTTT	ARS-UCD2.0	chr25	+	3650274	3650429	+	GCGTGAGAGCAGCAGCCATGTCAGCGGAACTGGAGACCTCAGAGGGGTTGGATGAGCCGGAGAAAAAGATCTCCGGGGTCCCAGAGAAGGAAAACCACACCAGGTGAGTGGTGGCAGCCGTGGTGCAGTCAGGTCGTGCTGCCGGGCCCCAGGATGCTCCGTGCCCCGCCGCCGCCTCGCCCTCGCCCCCGGCCCACGCAGGGAGGC	+	GCGTGAGAGCAGCAGCCATGTCAGCGGAACTGGAGACCTCAGAGGGGTTGGATGAGCCGGAGAAAAAGATCTCCGGGGTCCCAGAGAAGGAAAACCACACCAGGTGAGTGGTGGCAGCCGTGGTGCAGTCAGGTCGTGCTGCCGGGCCCCAGGATGCTCCGTGCCCCGCCGCCGCCTCGCCCTCGCCCCCGGCCCACGCAGGGAGGC	ARS-UCD2.0	chr25	3650247	3650453	HMOX2
20	TGTAGTTAGGTCGTGTTGTCGGGT	ACCAACTTTACCTCTAATTACCCTT	TTTAGGATGTTTCGTGTTTCGTCGTCGTTTCGTTTTCGTTTTCGGTTTACGTAGGGAGGTAGGATAGGTATTGTTTTAAGTGTTGAGTTATGGGATTTGATGATGTTTTTGGTCGTTTTTTTTTTTTGGAATTTTGAGCGTTTTGTTATTTGGGGTGAGT	ARS-UCD2.0	chr25	+	3650394	3650553	+	TGCAGTCAGGTCGTGCTGCCGGGCCCCAGGATGCTCCGTGCCCCGCCGCCGCCTCGCCCTCGCCCCCGGCCCACGCAGGGAGGCAGGACAGGCACTGCTCCAAGTGCTGAGTCATGGGATTTGATGATGCTCCTGGCCGTTTCTTCTTCCTGGAATTCTGAGCGTTTTGTCATCTGGGGTGAGCAAGGGTAATCAGAGGCAAAGCTGGC	+	TGCAGTCAGGTCGTGCTGCCGGGCCCCAGGATGCTCCGTGCCCCGCCGCCGCCTCGCCCTCGCCCCCGGCCCACGCAGGGAGGCAGGACAGGCACTGCTCCAAGTGCTGAGTCATGGGATTTGATGATGCTCCTGGCCGTTTCTTCTTCCTGGAATTCTGAGCGTTTTGTCATCTGGGGTGAGCAAGGGTAATCAGAGGCAAAGCTGGC	ARS-UCD2.0	chr25	3650370	3650578	HMOX2
21	TGGGATTTGATGATGTTTTTGGTCGT	ACAAACCCGAATAACTAAAAACTTCA	TTTTTTTTTTTGGAATTTTGAGCGTTTTGTTATTTGGGGTGAGTAAGGGTAATTAGAGGTAAAGTTGGTATTTTTTTAGTGTTTTTTATTTTTTAGATGTGGGAGTAGTTTTTAATTTTAGGGTTTTTTTTATTGGGTTGGGGGTAATTTATT	ARS-UCD2.0	chr25	+	3650510	3650662	+	TGGGATTTGATGATGCTCCTGGCCGTTTCTTCTTCCTGGAATTCTGAGCGTTTTGTCATCTGGGGTGAGCAAGGGTAATCAGAGGCAAAGCTGGCACCTTTCCAGTGTCTTCCACCCCTCAGATGTGGGAGTAGCTCTTAACTCCAGGGCTTTCCTTACTGGGTTGGGGGCAATTCACTTGAAGCCTCCAGTCACCCGGGCCTGT	+	TGGGATTTGATGATGCTCCTGGCCGTTTCTTCTTCCTGGAATTCTGAGCGTTTTGTCATCTGGGGTGAGCAAGGGTAATCAGAGGCAAAGCTGGCACCTTTCCAGTGTCTTCCACCCCTCAGATGTGGGAGTAGCTCTTAACTCCAGGGCTTTCCTTACTGGGTTGGGGGCAATTCACTTGAAGCCTCCAGTCACCCGGGCCTGT	ARS-UCD2.0	chr25	3650484	3650688	HMOX2
22	AGATGTGGGAGTAGTTTTTAATTTTAGGGT	TTAACTCATATCACTCATATACTACCAACA	TTTTTTTATTGGGTTGGGGGTAATTTATTTGAAGTTTTTAGTTATTCGGGTTTGTTTTTTATTATTTTTAGTTTTTTTTTATAGTTTTGTTATTGGTAAAGTTTTTTTTTTATATTTTGGAATAATTGTTGAAAATAAAT	ARS-UCD2.0	chr25	+	3650634	3650773	+	AGATGTGGGAGTAGCTCTTAACTCCAGGGCTTTCCTTACTGGGTTGGGGGCAATTCACTTGAAGCCTCCAGTCACCCGGGCCTGTTCTTCATCATTCTCAGCCTCTCCTTATAGCCCTGTCATTGGCAAAGTTCTCTTTTTACATCTTGGAATAATTGCTGAAAATAAACTGTTGGCAGCACATGAGTGATATGAGCCAA	+	AGATGTGGGAGTAGCTCTTAACTCCAGGGCTTTCCTTACTGGGTTGGGGGCAATTCACTTGAAGCCTCCAGTCACCCGGGCCTGTTCTTCATCATTCTCAGCCTCTCCTTATAGCCCTGTCATTGGCAAAGTTCTCTTTTTACATCTTGGAATAATTGCTGAAAATAAACTGTTGGCAGCACATGAGTGATATGAGCCAA	ARS-UCD2.0	chr25	3650604	3650803	HMOX2
23	GGTAAAGTTTTTTTTTTATATTTTGGAATAATTG	ACAAAAACCAAAACCAAAACCTATACTACTA	TTGAAAATAAATTGTTGGTAGTATATGAGTGATATGAGTTAATTTTTTAAAGAGGTTAGTAGAGTTTGGGTCGTGAGACGTTAGGTTTTTTTCGTTTTGGTCGATAGGTGTGTGGATGTATAGGAGTTTTTGTTTAGTATTTTTTTTGTTTTGTTTGGTGTTGGTATTTGTCGTGTGATTTTGTT	ARS-UCD2.0	chr25	+	3650762	3650946	+	GGCAAAGTTCTCTTTTTACATCTTGGAATAATTGCTGAAAATAAACTGTTGGCAGCACATGAGTGATATGAGCCAATCTCCCAAAGAGGCCAGCAGAGCCTGGGCCGTGAGACGCCAGGCTTTTCTCGCTCTGGTCGACAGGTGTGTGGATGCACAGGAGTCCCTGCCCAGCACCTTCTCTGCCTTGTCTGGTGCTGGCATCTGTCGTGTGATTTTGTTCAGCAGTACAGGCCTTGGTCCTGGCTCTTGC	+	GGCAAAGTTCTCTTTTTACATCTTGGAATAATTGCTGAAAATAAACTGTTGGCAGCACATGAGTGATATGAGCCAATCTCCCAAAGAGGCCAGCAGAGCCTGGGCCGTGAGACGCCAGGCTTTTCTCGCTCTGGTCGACAGGTGTGTGGATGCACAGGAGTCCCTGCCCAGCACCTTCTCTGCCTTGTCTGGTGCTGGCATCTGTCGTGTGATTTTGTTCAGCAGTACAGGCCTTGGTCCTGGCTCTTGC	ARS-UCD2.0	chr25	3650728	3650977	HMOX2
24	TTGGTGTTGGTATTTGTCGTGTGA	CGTATCTCCCAAAATCCACACCCC	TTTTGTTTAGTAGTATAGGTTTTGGTTTTGGTTTTTGTTTTTTTAGTTTCGTTTTTAGTTTTATTTTTTTGTGTCGGGTTTTAGTTTTATGTTATTTTTAGGGGTTGTGGGTTTAAGGTGGGAGGAAAGTAGTTGGGTTATTTTAGGAGGTGTACGGTTTGTTTTTTTA	ARS-UCD2.0	chr25	+	3650940	3651108	+	CTGGTGCTGGCATCTGTCGTGTGATTTTGTTCAGCAGTACAGGCCTTGGTCCTGGCTCTTGCCTCCCCAGCCTCGCTCTCAGTCCCATCCTTCTGTGCCGGGTCCCAGCTTCATGTCATCCTCAGGGGCTGTGGGTCCAAGGTGGGAGGAAAGCAGCTGGGCCACCCCAGGAGGTGCACGGTCTGTTCTCTCAGGGGTGTGGATCCTGGGAGACACG	+	CTGGTGCTGGCATCTGTCGTGTGATTTTGTTCAGCAGTACAGGCCTTGGTCCTGGCTCTTGCCTCCCCAGCCTCGCTCTCAGTCCCATCCTTCTGTGCCGGGTCCCAGCTTCATGTCATCCTCAGGGGCTGTGGGTCCAAGGTGGGAGGAAAGCAGCTGGGCCACCCCAGGAGGTGCACGGTCTGTTCTCTCAGGGGTGTGGATCCTGGGAGACACG	ARS-UCD2.0	chr25	3650916	3651132	HMOX2
25	TGGGTTATTTTAGGAGGTGTACGGT	TCGAACTCTAAATAACTCTAACCCACTCC	TTGTTTTTTTAGGGGTGTGGATTTTGGGAGATACGTTTTTTAAAGTCGTTTGTTTTTTGAGGTTAGTATATATTGTGGTAGGGTGAGGTATGTGTTTTTTCGGGCGGGTATAGAAGTTAAGTATTATTTATTTGGGTGTTTTAGAGAGATTCGGGTACGGT	ARS-UCD2.0	chr25	+	3651098	3651258	+	TGGGCCACCCCAGGAGGTGCACGGTCTGTTCTCTCAGGGGTGTGGATCCTGGGAGACACGTTCCCCAAAGTCGTCTGTTCCTTGAGGTCAGCACACACTGTGGTAGGGTGAGGTATGTGTTTCTTCGGGCGGGCACAGAAGCCAAGCATCACTCATTTGGGTGCTTCAGAGAGACCCGGGCACGGTGGAGTGGGTCAGAGTCATCCAGAGTCCGA	+	TGGGCCACCCCAGGAGGTGCACGGTCTGTTCTCTCAGGGGTGTGGATCCTGGGAGACACGTTCCCCAAAGTCGTCTGTTCCTTGAGGTCAGCACACACTGTGGTAGGGTGAGGTATGTGTTTCTTCGGGCGGGCACAGAAGCCAAGCATCACTCATTTGGGTGCTTCAGAGAGACCCGGGCACGGTGGAGTGGGTCAGAGTCATCCAGAGTCCGA	ARS-UCD2.0	chr25	3651073	3651287	HMOX2
26	ATTTATTTGGGTGTTTTAGAGAGATTCGGGT	AAAAACATATACGAATTAACCTTCCAAC	ACGGTGGAGTGGGTTAGAGTTATTTAGAGTTCGAGTTTTGGGAGTAGATTTACGTTTGTTTGTGTTTTGTTTTTTGTTGAGAGGTTGGAATTACGTTTTTGAGTAGTTTTTGTTTCGAGTTCGGCGAGTGGTTAGTTTGGA	ARS-UCD2.0	chr25	+	3651254	3651394	+	ACTCATTTGGGTGCTTCAGAGAGACCCGGGCACGGTGGAGTGGGTCAGAGTCATCCAGAGTCCGAGTCCTGGGAGCAGACCCACGTCTGCCTGTGCTTTGCTCCCTGCTGAGAGGCTGGAATCACGTTTCTGAGCAGCCTCTGCCTCGAGCTCGGCGAGTGGTCAGCCTGGAGTTGGAAGGCTAATTCGCACATGCTTTC	+	ACTCATTTGGGTGCTTCAGAGAGACCCGGGCACGGTGGAGTGGGTCAGAGTCATCCAGAGTCCGAGTCCTGGGAGCAGACCCACGTCTGCCTGTGCTTTGCTCCCTGCTGAGAGGCTGGAATCACGTTTCTGAGCAGCCTCTGCCTCGAGCTCGGCGAGTGGTCAGCCTGGAGTTGGAAGGCTAATTCGCACATGCTTTC	ARS-UCD2.0	chr25	3651223	3651422	HMOX2
27	GTTTCGAGTTCGGCGAGTGGTTAG	CCAACCCAACCCAATTCACGACTA	TTTGGAGTTGGAAGGTTAATTCGTATATGTTTTTTTTATAGGATGGTAGATTTTTTCGAGTTTTTGAAGGAAGGGATTAAGGAATTATATGATCGGGCGGAAAATATTTAGTTTGTTAAGGATTTTTTGAAAGGTAATATTAGGAAGGAGTTATTTAAGGTTTGTGTTTT	ARS-UCD2.0	chr25	+	3651389	3651558	+	GCCTCGAGCTCGGCGAGTGGTCAGCCTGGAGTTGGAAGGCTAATTCGCACATGCTTTCTCCATAGGATGGCAGACCTTTCCGAGCTCCTGAAGGAAGGGACCAAGGAATCACATGACCGGGCGGAAAACACCCAGTTTGTCAAGGACTTCTTGAAAGGCAACATCAGGAAGGAGCTATTCAAGGTTTGTGCCCTCAGTCGTGAACTGGGTTGGGCTGG	+	GCCTCGAGCTCGGCGAGTGGTCAGCCTGGAGTTGGAAGGCTAATTCGCACATGCTTTCTCCATAGGATGGCAGACCTTTCCGAGCTCCTGAAGGAAGGGACCAAGGAATCACATGACCGGGCGGAAAACACCCAGTTTGTCAAGGACTTCTTGAAAGGCAACATCAGGAAGGAGCTATTCAAGGTTTGTGCCCTCAGTCGTGAACTGGGTTGGGCTGG	ARS-UCD2.0	chr25	3651365	3651582	HMOX2
28	AGGTAATATTAGGAAGGAGTTATTTAAGGT	ATTCTTTAAAACACAAATCACTTCCTTT	TTGTGTTTTTAGTCGTGAATTGGGTTGGGTTGGGGGTTTTTAGTTTTATAGGGTTGTTTATTTTTTAGTTTTTTTTTATATTTTATGTTTTTTTAGTATTAGGTTGTGGTTTTATGTTTTAAAAGGAATAAGGTAGTGATGT	ARS-UCD2.0	chr25	+	3651550	3651691	+	AGGCAACATCAGGAAGGAGCTATTCAAGGTTTGTGCCCTCAGTCGTGAACTGGGTTGGGCTGGGGGCCCTTAGTCCCACAGGGTTGCCTATCCCCCAGCTTTCCTCCACACCTCATGTTTTCTCAGCATCAGGCTGTGGTTTCATGTCTTAAAAGGAATAAGGTAGTGATGTAAAGGAAGTGATCTGTGTTCCAAAGAAT	+	AGGCAACATCAGGAAGGAGCTATTCAAGGTTTGTGCCCTCAGTCGTGAACTGGGTTGGGCTGGGGGCCCTTAGTCCCACAGGGTTGCCTATCCCCCAGCTTTCCTCCACACCTCATGTTTTCTCAGCATCAGGCTGTGGTTTCATGTCTTAAAAGGAATAAGGTAGTGATGTAAAGGAAGTGATCTGTGTTCCAAAGAAT	ARS-UCD2.0	chr25	3651520	3651719	HMOX2
29	AGGTTGTGGTTTTATGTTTTAAAAGGA	CCAAAACCTAAACCAACAACTCCCA	ATAAGGTAGTGATGTAAAGGAAGTGATTTGTGTTTTAAAGAATTTATTATGTTATTTTTTTAAGAAATAAACGTTTTTTGTATACGTGAAATAATTTATTGTAAAAGTGGGGAGCGGAGGGGGTGTTTAGGAGTGTGGGTAGTGGGTT	ARS-UCD2.0	chr25	+	3651677	3651824	+	AGGCTGTGGTTTCATGTCTTAAAAGGAATAAGGTAGTGATGTAAAGGAAGTGATCTGTGTTCCAAAGAATTCACCATGTCATTCCTTTAAGAAACAAACGCTTCCTGCACACGTGAAATAACTCACTGTAAAAGTGGGGAGCGGAGGGGGTGCTCAGGAGTGTGGGCAGTGGGCTTGGGAGTTGCTGGCCCAGGCCCTGG	+	AGGCTGTGGTTTCATGTCTTAAAAGGAATAAGGTAGTGATGTAAAGGAAGTGATCTGTGTTCCAAAGAATTCACCATGTCATTCCTTTAAGAAACAAACGCTTCCTGCACACGTGAAATAACTCACTGTAAAAGTGGGGAGCGGAGGGGGTGCTCAGGAGTGTGGGCAGTGGGCTTGGGAGTTGCTGGCCCAGGCCCTGG	ARS-UCD2.0	chr25	3651650	3651849	HMOX2
30	GGGGTGTTTAGGAGTGTGGGTAGT	TCGCCGTAAAAATACTCCATATCCCT	GGGTTTGGGAGTTGTTGGTTTAGGTTTTGGTTTTTTTTTATGGTTTTTTTATCGTTTTTGGTAGTTGGTTATTATCGCGTTGTATTTTATTTATTTCGTTTTGGAGGAGGAGATCGATCGGAATAAGGATTATTTAGTTTTTGTTTTTTTGTATTTTTTTACGGAGTTATATCGGAAGAAGGCGTTGATT	ARS-UCD2.0	chr25	+	3651820	3652009	+	GGGGTGCTCAGGAGTGTGGGCAGTGGGCTTGGGAGTTGCTGGCCCAGGCCCTGGCCCTCTCCCATGGTCTCCCCATCGCCCTTGGCAGCTGGCCACCACCGCGCTGTACTTCACCTACTCCGCCTTGGAGGAGGAGATCGACCGGAACAAGGACCACCCAGCCTTTGCCCCCTTGTACTTCCCCACGGAGCTACACCGGAAGAAGGCGCTGATCAGGGACATGGAGTATCTCTACGGCGA	+	GGGGTGCTCAGGAGTGTGGGCAGTGGGCTTGGGAGTTGCTGGCCCAGGCCCTGGCCCTCTCCCATGGTCTCCCCATCGCCCTTGGCAGCTGGCCACCACCGCGCTGTACTTCACCTACTCCGCCTTGGAGGAGGAGATCGACCGGAACAAGGACCACCCAGCCTTTGCCCCCTTGTACTTCCCCACGGAGCTACACCGGAAGAAGGCGCTGATCAGGGACATGGAGTATCTCTACGGCGA	ARS-UCD2.0	chr25	3651796	3652035	HMOX2
31	ACGGAGTTATATCGGAAGAAGGCG	CCCGCTAAACCACCTTCTTCAACA	TTGATTAGGGATATGGAGTATTTTTACGGCGAGTATTGGGAGGAGTAGGCGTAGTGTTTCGAGGTTATTCGGAAGTACGTGGAGCGGATTTACGAGGTGGGGTAGAACGAATTAGAGTTGTTGGTGGTTTACGTTTATATTCGTTATATGGGGGATTTTTCGGGGGGTTAGG	ARS-UCD2.0	chr25	+	3652004	3652175	+	ACGGAGCTACACCGGAAGAAGGCGCTGATCAGGGACATGGAGTATCTCTACGGCGAGCACTGGGAGGAGCAGGCGCAGTGCTCCGAGGCCACCCGGAAGTACGTGGAGCGGATCCACGAGGTGGGGCAGAACGAACCAGAGCTGCTGGTGGCCCACGCCTACACCCGCTACATGGGGGACCTCTCGGGGGGCCAGGTGCTGAAGAAGGTGGCCCAGCGGG	+	ACGGAGCTACACCGGAAGAAGGCGCTGATCAGGGACATGGAGTATCTCTACGGCGAGCACTGGGAGGAGCAGGCGCAGTGCTCCGAGGCCACCCGGAAGTACGTGGAGCGGATCCACGAGGTGGGGCAGAACGAACCAGAGCTGCTGGTGGCCCACGCCTACACCCGCTACATGGGGGACCTCTCGGGGGGCCAGGTGCTGAAGAAGGTGGCCCAGCGGG	ARS-UCD2.0	chr25	3651980	3652199	HMOX2
32	GGTTGTTTGGAAGATAAAAAGGGAGAG	TTCCCTAACACTCTATTCTACTCTCTATCTA	GTAGATTTAGTTTTTTTTTTGGTTTATTTTTTATTTTTTTTGGAGTTTTTTTTGGTTAATTGGAAGGGAGTAGTAAAGTTGAGTGTATTGAAATTTTGAGGAATTGTAAAGTTTAGGTTTTTTTGTTTTTTTATTT	ARS-UCD2.0	chr4	+	400601	400736	+	GGCTGCCTGGAAGACAAAAAGGGAGAGGCAGACCTAGCTTCTCCCTTGGCCTATCTCCCATCTTTCCTGGAGCCTTTTCTGGCTAACTGGAAGGGAGCAGCAAAGTTGAGTGCACTGAAATCCTGAGGAATTGCAAAGCCCAGGCCTCCCTGTCTTCCCACTTCAGACAGAGAGCAGAACAGAGTGTCAGGGAA	+	GGCTGCCTGGAAGACAAAAAGGGAGAGGCAGACCTAGCTTCTCCCTTGGCCTATCTCCCATCTTTCCTGGAGCCTTTTCTGGCTAACTGGAAGGGAGCAGCAAAGTTGAGTGCACTGAAATCCTGAGGAATTGCAAAGCCCAGGCCTCCCTGTCTTCCCACTTCAGACAGAGAGCAGAACAGAGTGTCAGGGAA	ARS-UCD2.0	chr4	400574	400767	internal control
33	TTGTTTTGTTATTGATTTGGTTGTTGAGTA	CTTTCTACTTACCCTAAAACTAACCTATTCC	TATATTATTTTTTTATATTTGAAATTAGAAATGGTTTAGGGTTAAAGAGATTTTTGTTATTTAGATTTTGATATTTGGATTTTTAGTGTTGGTAGTGAAGGTTTAAGTAGGTTTTAGTAGATGGTTTGAGAGAGGATTTTAATTGTAGAGATTG	ARS-UCD2.0	chr4	+	402027	402180	+	TTGCCTTGCCACTGATTTGGTTGTTGAGCACACACCATCTCCCTACACCTGAAATTAGAAATGGTCCAGGGCCAAAGAGATCTCTGCTATCTAGACTTTGACATTTGGATCCCTAGTGCTGGCAGTGAAGGTCTAAGCAGGTTTCAGCAGATGGTCTGAGAGAGGACTTCAATTGCAGAGATTGGGAACAGGCCAGTCTCAGGGCAAGCAGAAAG	+	TTGCCTTGCCACTGATTTGGTTGTTGAGCACACACCATCTCCCTACACCTGAAATTAGAAATGGTCCAGGGCCAAAGAGATCTCTGCTATCTAGACTTTGACATTTGGATCCCTAGTGCTGGCAGTGAAGGTCTAAGCAGGTTTCAGCAGATGGTCTGAGAGAGGACTTCAATTGCAGAGATTGGGAACAGGCCAGTCTCAGGGCAAGCAGAAAG	ARS-UCD2.0	chr4	401997	402211	internal control
34	TGGTAAGTAGATGGGGAAATAATTGAAATAG	ACTCTCACATCCATACATAACCACT	TGGTTGTTTTTATTTTGGGGGTTTTAAAATTATTGTAGATGGTGATTGTAGTTATGAAATTAAAAGATATTTATTTTTTGGTAGGAAAGTTATGATTAAATTAGATAGTATATTAAAAAGTAGAGATATTATTTTGTTAATAAAGGTTTATTTAGTTAAGGTTATGGTTTTTTT	ARS-UCD2.0	chr4	+	409251	409424	+	TGGCAAGTAGATGGGGAAACAATTGAAACAGTGGCTGTCTTTATTTTGGGGGCTCCAAAATCACTGCAGATGGTGATTGCAGCCATGAAATTAAAAGACACTTACTCCTTGGTAGGAAAGTTATGACCAAACTAGACAGCATATTAAAAAGCAGAGACATTACTTTGCCAACAAAGGTCCATCTAGTCAAGGCTATGGTTTTTCCAGTGGTCATGTATGGATGTGAGAGT	+	TGGCAAGTAGATGGGGAAACAATTGAAACAGTGGCTGTCTTTATTTTGGGGGCTCCAAAATCACTGCAGATGGTGATTGCAGCCATGAAATTAAAAGACACTTACTCCTTGGTAGGAAAGTTATGACCAAACTAGACAGCATATTAAAAAGCAGAGACATTACTTTGCCAACAAAGGTCCATCTAGTCAAGGCTATGGTTTTTCCAGTGGTCATGTATGGATGTGAGAGT	ARS-UCD2.0	chr4	409220	409449	internal control

## Sheet: Table S3
Table S3. Overall Details of Individual Cattles
Order	Sample_name	Sample_title	Organism	Breed	Sex	Age	Tissue	Library_strategy	Total number of spots	Total number of bases	GC percentage	BioProject_accession	BioSample_accession	SRA_accession	Link	Note
1	T_1SU	tie stalls supraspinatus 1	Bos taurus	Xinjiang Brown Cattle	Male	3	muscle	RNA-seq	19242287	5760775090	52.08	PRJNA1393192	SAMN54294030	SRR36589799	https://dataview.ncbi.nlm.nih.gov/object/PRJNA1393192?reviewer=rmt0afi2ulrq8jaufuu6g7cbsk	To be released 2026-12-22
2	T_2SU	tie stalls supraspinatus 2	Bos taurus	Xinjiang Brown Cattle	Male	3	muscle	RNA-seq	19245364	5761701212	51.49	PRJNA1393192	SAMN54294031	SRR36589798
3	T_3SU	tie stalls supraspinatus 3	Bos taurus	Xinjiang Brown Cattle	Male	3	muscle	RNA-seq	19585311	5863675506	51.5	PRJNA1393192	SAMN54294032	SRR36589787
4	T_4SU	tie stalls supraspinatus 4	Bos taurus	Xinjiang Brown Cattle	Male	3	muscle	RNA-seq	22049283	6600738442	51	PRJNA1393192	SAMN54294033	SRR36589776
5	T_5SU	tie stalls supraspinatus 5	Bos taurus	Xinjiang Brown Cattle	Male	3	muscle	RNA-seq	22188178	6634618002	51.7	PRJNA1393192	SAMN54294034	SRR36589765
6	T_6SU	tie stalls supraspinatus 6	Bos taurus	Xinjiang Brown Cattle	Male	3	muscle	RNA-seq	20654507	6181234960	50.93	PRJNA1393192	SAMN54294035	SRR36589754
7	T_7SU	tie stalls supraspinatus 7	Bos taurus	Xinjiang Brown Cattle	Male	3	muscle	RNA-seq	20773318	6218768646	51.7	PRJNA1393192	SAMN54294036	SRR36589743
8	T_8SU	tie stalls supraspinatus 8	Bos taurus	Xinjiang Brown Cattle	Male	3	muscle	RNA-seq	23255942	6961840354	52.1	PRJNA1393192	SAMN54294037	SRR36589742
9	T_9SU	tie stalls supraspinatus 9	Bos taurus	Xinjiang Brown Cattle	Male	3	muscle	RNA-seq	21789475	6523362940	52	PRJNA1393192	SAMN54294038	SRR36589741
10	T_10SU	tie stalls supraspinatus 10	Bos taurus	Xinjiang Brown Cattle	Male	3	muscle	RNA-seq	19882739	5952102414	52.45	PRJNA1393192	SAMN54294039	SRR36589740
11	T_1LL	tie stalls longissimus lumborum 1	Bos taurus	Xinjiang Brown Cattle	Male	3	muscle	RNA-seq	19157936	5728831704	52.76	PRJNA1393192	SAMN54294040	SRR36589797
12	T_2LL	tie stalls longissimus lumborum 2	Bos taurus	Xinjiang Brown Cattle	Male	3	muscle	RNA-seq	20085394	6012499134	51.96	PRJNA1393192	SAMN54294041	SRR36589796
13	T_3LL	tie stalls longissimus lumborum 3	Bos taurus	Xinjiang Brown Cattle	Male	3	muscle	RNA-seq	20687426	6193041126	53.35	PRJNA1393192	SAMN54294042	SRR36589795
14	T_4LL	tie stalls longissimus lumborum 4	Bos taurus	Xinjiang Brown Cattle	Male	3	muscle	RNA-seq	21445108	6420541538	52.88	PRJNA1393192	SAMN54294043	SRR36589794
15	T_5LL	tie stalls longissimus lumborum 5	Bos taurus	Xinjiang Brown Cattle	Male	3	muscle	RNA-seq	21339655	6389030580	53.55	PRJNA1393192	SAMN54294044	SRR36589793
16	T_6LL	tie stalls longissimus lumborum 6	Bos taurus	Xinjiang Brown Cattle	Male	3	muscle	RNA-seq	22405971	6707805390	53.14	PRJNA1393192	SAMN54294045	SRR36589792
17	T_7LL	tie stalls longissimus lumborum 7	Bos taurus	Xinjiang Brown Cattle	Male	3	muscle	RNA-seq	21286857	6373714778	52.6	PRJNA1393192	SAMN54294046	SRR36589791
18	T_8LL	tie stalls longissimus lumborum 8	Bos taurus	Xinjiang Brown Cattle	Male	3	muscle	RNA-seq	21917173	6562015622	51.71	PRJNA1393192	SAMN54294047	SRR36589790
19	T_9LL	tie stalls longissimus lumborum 9	Bos taurus	Xinjiang Brown Cattle	Male	3	muscle	RNA-seq	21289787	6368264816	51.75	PRJNA1393192	SAMN54294048	SRR36589789
20	T_10LL	tie stalls longissimus lumborum 10	Bos taurus	Xinjiang Brown Cattle	Male	3	muscle	RNA-seq	20567306	6156407454	52.29	PRJNA1393192	SAMN54294049	SRR36589788
21	T_1ST	tie stalls semitendinosus 1	Bos taurus	Xinjiang Brown Cattle	Male	3	muscle	RNA-seq	20883372	6247855234	51.25	PRJNA1393192	SAMN54294050	SRR36589786
22	T_2ST	tie stalls semitendinosus 2	Bos taurus	Xinjiang Brown Cattle	Male	3	muscle	RNA-seq	20709757	6197929716	51.83	PRJNA1393192	SAMN54294051	SRR36589785
23	T_3ST	tie stalls semitendinosus 3	Bos taurus	Xinjiang Brown Cattle	Male	3	muscle	RNA-seq	22790490	6822853584	52.49	PRJNA1393192	SAMN54294052	SRR36589784
24	T_4ST	tie stalls semitendinosus 4	Bos taurus	Xinjiang Brown Cattle	Male	3	muscle	RNA-seq	20236608	6057171250	52.1	PRJNA1393192	SAMN54294053	SRR36589783
25	T_5ST	tie stalls semitendinosus 5	Bos taurus	Xinjiang Brown Cattle	Male	3	muscle	RNA-seq	20001984	5987347146	52.86	PRJNA1393192	SAMN54294054	SRR36589782
26	T_6ST	tie stalls semitendinosus 6	Bos taurus	Xinjiang Brown Cattle	Male	3	muscle	RNA-seq	19803033	5928801630	52.47	PRJNA1393192	SAMN54294055	SRR36589781
27	T_7ST	tie stalls semitendinosus 7	Bos taurus	Xinjiang Brown Cattle	Male	3	muscle	RNA-seq	19371264	5799059070	52.44	PRJNA1393192	SAMN54294056	SRR36589780
28	T_8ST	tie stalls semitendinosus 8	Bos taurus	Xinjiang Brown Cattle	Male	3	muscle	RNA-seq	20448153	6121267764	51.28	PRJNA1393192	SAMN54294057	SRR36589779
29	T_9ST	tie stalls semitendinosus 9	Bos taurus	Xinjiang Brown Cattle	Male	3	muscle	RNA-seq	20268820	6066048936	52.5	PRJNA1393192	SAMN54294058	SRR36589778
30	T_10ST	tie stalls semitendinosus 10	Bos taurus	Xinjiang Brown Cattle	Male	3	muscle	RNA-seq	22340049	6686772236	51.72	PRJNA1393192	SAMN54294059	SRR36589777
31	L_1SU	loose housing supraspinatus 1	Bos taurus	Xinjiang Brown Cattle	Male	3	muscle	RNA-seq	21981196	6581258118	50.42	PRJNA1393192	SAMN54294060	SRR36589775
32	L_2SU	loose housing supraspinatus 2	Bos taurus	Xinjiang Brown Cattle	Male	3	muscle	RNA-seq	21053940	6303325992	52.21	PRJNA1393192	SAMN54294061	SRR36589774
33	L_3SU	loose housing supraspinatus 3	Bos taurus	Xinjiang Brown Cattle	Male	3	muscle	RNA-seq	21237832	6353919950	51.81	PRJNA1393192	SAMN54294062	SRR36589773
34	L_4SU	loose housing supraspinatus 4	Bos taurus	Xinjiang Brown Cattle	Male	3	muscle	RNA-seq	21940788	6568290534	52	PRJNA1393192	SAMN54294063	SRR36589772
35	L_5SU	loose housing supraspinatus 5	Bos taurus	Xinjiang Brown Cattle	Male	3	muscle	RNA-seq	20851362	6243211950	52.98	PRJNA1393192	SAMN54294064	SRR36589771
36	L_6SU	loose housing supraspinatus 6	Bos taurus	Xinjiang Brown Cattle	Male	3	muscle	RNA-seq	23048276	6900577966	52.03	PRJNA1393192	SAMN54294065	SRR36589770
37	L_7SU	loose housing supraspinatus 7	Bos taurus	Xinjiang Brown Cattle	Male	3	muscle	RNA-seq	20947748	6272217624	51.88	PRJNA1393192	SAMN54294066	SRR36589769
38	L_8SU	loose housing supraspinatus 8	Bos taurus	Xinjiang Brown Cattle	Male	3	muscle	RNA-seq	21053147	6303183290	51.97	PRJNA1393192	SAMN54294067	SRR36589768
39	L_9SU	loose housing supraspinatus 9	Bos taurus	Xinjiang Brown Cattle	Male	3	muscle	RNA-seq	20035874	5998614916	51.55	PRJNA1393192	SAMN54294068	SRR36589767
40	L_10SU	loose housing supraspinatus 10	Bos taurus	Xinjiang Brown Cattle	Male	3	muscle	RNA-seq	19073217	5710773092	52.13	PRJNA1393192	SAMN54294069	SRR36589766
41	L_1LL	loose housing longissimus lumborum 1	Bos taurus	Xinjiang Brown Cattle	Male	3	muscle	RNA-seq	20890252	6254091040	52.04	PRJNA1393192	SAMN54294070	SRR36589764
42	L_2LL	loose housing longissimus lumborum 2	Bos taurus	Xinjiang Brown Cattle	Male	3	muscle	RNA-seq	20603728	6169329040	53.11	PRJNA1393192	SAMN54294071	SRR36589763
43	L_3LL	loose housing longissimus lumborum 3	Bos taurus	Xinjiang Brown Cattle	Male	3	muscle	RNA-seq	19408843	5811607490	53.16	PRJNA1393192	SAMN54294072	SRR36589762
44	L_4LL	loose housing longissimus lumborum 4	Bos taurus	Xinjiang Brown Cattle	Male	3	muscle	RNA-seq	24833721	7434962088	53.48	PRJNA1393192	SAMN54294073	SRR36589761
45	L_5LL	loose housing longissimus lumborum 5	Bos taurus	Xinjiang Brown Cattle	Male	3	muscle	RNA-seq	22039997	6599656522	53.82	PRJNA1393192	SAMN54294074	SRR36589760
46	L_6LL	loose housing longissimus lumborum 6	Bos taurus	Xinjiang Brown Cattle	Male	3	muscle	RNA-seq	19533598	5848990212	52.7	PRJNA1393192	SAMN54294075	SRR36589759
47	L_7LL	loose housing longissimus lumborum 7	Bos taurus	Xinjiang Brown Cattle	Male	3	muscle	RNA-seq	21109585	6316182582	51.88	PRJNA1393192	SAMN54294076	SRR36589758
48	L_8LL	loose housing longissimus lumborum 8	Bos taurus	Xinjiang Brown Cattle	Male	3	muscle	RNA-seq	23609646	7069021710	53.08	PRJNA1393192	SAMN54294077	SRR36589757
49	L_9LL	loose housing longissimus lumborum 9	Bos taurus	Xinjiang Brown Cattle	Male	3	muscle	RNA-seq	19894259	5956253446	52.18	PRJNA1393192	SAMN54294078	SRR36589756
50	L_10LL	loose housing longissimus lumborum 10	Bos taurus	Xinjiang Brown Cattle	Male	3	muscle	RNA-seq	22176280	6638470466	53.07	PRJNA1393192	SAMN54294079	SRR36589755
51	L_1ST	loose housing semitendinosus 1	Bos taurus	Xinjiang Brown Cattle	Male	3	muscle	RNA-seq	20225657	6055625706	52.32	PRJNA1393192	SAMN54294080	SRR36589753
52	L_2ST	loose housing semitendinosus 2	Bos taurus	Xinjiang Brown Cattle	Male	3	muscle	RNA-seq	21034718	6297457732	52.42	PRJNA1393192	SAMN54294081	SRR36589752
53	L_3ST	loose housing semitendinosus 3	Bos taurus	Xinjiang Brown Cattle	Male	3	muscle	RNA-seq	19940195	5970126358	52.11	PRJNA1393192	SAMN54294082	SRR36589751
54	L_4ST	loose housing semitendinosus 4	Bos taurus	Xinjiang Brown Cattle	Male	3	muscle	RNA-seq	20684120	6193830466	54.65	PRJNA1393192	SAMN54294083	SRR36589750
55	L_5ST	loose housing semitendinosus 5	Bos taurus	Xinjiang Brown Cattle	Male	3	muscle	RNA-seq	21261779	6365514606	51.98	PRJNA1393192	SAMN54294084	SRR36589749
56	L_6ST	loose housing semitendinosus 6	Bos taurus	Xinjiang Brown Cattle	Male	3	muscle	RNA-seq	20817676	6232862730	52.2	PRJNA1393192	SAMN54294085	SRR36589748
57	L_7ST	loose housing semitendinosus 7	Bos taurus	Xinjiang Brown Cattle	Male	3	muscle	RNA-seq	20121266	6020195352	50.05	PRJNA1393192	SAMN54294086	SRR36589747
58	L_8ST	loose housing semitendinosus 8	Bos taurus	Xinjiang Brown Cattle	Male	3	muscle	RNA-seq	21984562	6581518054	53.11	PRJNA1393192	SAMN54294087	SRR36589746
59	L_9ST	loose housing semitendinosus 9	Bos taurus	Xinjiang Brown Cattle	Male	3	muscle	RNA-seq	21684574	6492414684	53.16	PRJNA1393192	SAMN54294088	SRR36589745
60	L_10ST	loose housing semitendinosus 10	Bos taurus	Xinjiang Brown Cattle	Male	3	muscle	RNA-seq	23111427	6919564586	53.43	PRJNA1393192	SAMN54294089	SRR36589744
1	T_1LL	tie stalls longissimus lumborum 1	Bos taurus	Xinjiang Brown Cattle	Male	3	muscle	Bisulfite-Seq (RRBS)	42969076	12890722800	37.82	PRJNA1395795	SAMN54371830	SRR36643743	https://dataview.ncbi.nlm.nih.gov/object/PRJNA1395795?reviewer=olqpal9as33q66kbggeft8h5v	To be released 2026-12-31
2	T_2LL	tie stalls longissimus lumborum 2	Bos taurus	Xinjiang Brown Cattle	Male	3	muscle	Bisulfite-Seq (RRBS)	36078867	10823660100	36.29	PRJNA1395795	SAMN54371831	SRR36643742
3	T_8LL	tie stalls longissimus lumborum 8	Bos taurus	Xinjiang Brown Cattle	Male	3	muscle	Bisulfite-Seq (RRBS)	45960512	13788153600	37.2	PRJNA1395795	SAMN54371832	SRR36643731
4	T_9LL	tie stalls longissimus lumborum 9	Bos taurus	Xinjiang Brown Cattle	Male	3	muscle	Bisulfite-Seq (RRBS)	35878372	10763511600	37.01	PRJNA1395795	SAMN54371833	SRR36643726
5	T_3LL	tie stalls longissimus lumborum 3	Bos taurus	Xinjiang Brown Cattle	Male	3	muscle	Bisulfite-Seq (RRBS)	30858707	9257612100	37.52	PRJNA1395795	SAMN54371834	SRR36643725
6	T_5LL	tie stalls longissimus lumborum 5	Bos taurus	Xinjiang Brown Cattle	Male	3	muscle	Bisulfite-Seq (RRBS)	41224364	12367309200	34.32	PRJNA1395795	SAMN54371835	SRR36643724
7	T_1ST	tie stalls semitendinosus 1	Bos taurus	Xinjiang Brown Cattle	Male	3	muscle	Bisulfite-Seq (RRBS)	39374361	11812308300	37.7	PRJNA1395795	SAMN54371836	SRR36643723
8	T_2ST	tie stalls semitendinosus 2	Bos taurus	Xinjiang Brown Cattle	Male	3	muscle	Bisulfite-Seq (RRBS)	46659330	13997799000	39.97	PRJNA1395795	SAMN54371837	SRR36643722
9	T_8ST	tie stalls semitendinosus 8	Bos taurus	Xinjiang Brown Cattle	Male	3	muscle	Bisulfite-Seq (RRBS)	54730366	16419109800	39.67	PRJNA1395795	SAMN54371838	SRR36643721
10	T_9ST	tie stalls semitendinosus 9	Bos taurus	Xinjiang Brown Cattle	Male	3	muscle	Bisulfite-Seq (RRBS)	42324971	12697491300	40.19	PRJNA1395795	SAMN54371839	SRR36643720
11	T_3ST	tie stalls semitendinosus 3	Bos taurus	Xinjiang Brown Cattle	Male	3	muscle	Bisulfite-Seq (RRBS)	46539205	13961761500	37.06	PRJNA1395795	SAMN54371840	SRR36643741
12	T_5ST	tie stalls semitendinosus 5	Bos taurus	Xinjiang Brown Cattle	Male	3	muscle	Bisulfite-Seq (RRBS)	42929398	12878819400	36.52	PRJNA1395795	SAMN54371841	SRR36643740
13	L_8LL	loose housing longissimus lumborum 8	Bos taurus	Xinjiang Brown Cattle	Male	3	muscle	Bisulfite-Seq (RRBS)	33476876	10043062800	36.61	PRJNA1395795	SAMN54371842	SRR36643739
14	L_3LL	loose housing longissimus lumborum 3	Bos taurus	Xinjiang Brown Cattle	Male	3	muscle	Bisulfite-Seq (RRBS)	40735635	12220690500	37.92	PRJNA1395795	SAMN54371843	SRR36643738
15	L_10LL	loose housing longissimus lumborum 10	Bos taurus	Xinjiang Brown Cattle	Male	3	muscle	Bisulfite-Seq (RRBS)	31866949	9560084700	38	PRJNA1395795	SAMN54371844	SRR36643737
16	L_9LL	loose housing longissimus lumborum 9	Bos taurus	Xinjiang Brown Cattle	Male	3	muscle	Bisulfite-Seq (RRBS)	27701613	8310483900	35.91	PRJNA1395795	SAMN54371845	SRR36643736
17	L_4LL	loose housing longissimus lumborum 4	Bos taurus	Xinjiang Brown Cattle	Male	3	muscle	Bisulfite-Seq (RRBS)	29695766	8908729800	38.02	PRJNA1395795	SAMN54371846	SRR36643735
18	L_5LL	loose housing longissimus lumborum 5	Bos taurus	Xinjiang Brown Cattle	Male	3	muscle	Bisulfite-Seq (RRBS)	42815096	12844528800	38.62	PRJNA1395795	SAMN54371847	SRR36643734
19	L_8ST	loose housing semitendinosus 8	Bos taurus	Xinjiang Brown Cattle	Male	3	muscle	Bisulfite-Seq (RRBS)	33002458	9900737400	39.08	PRJNA1395795	SAMN54371848	SRR36643733
20	L_3ST	loose housing semitendinosus 3	Bos taurus	Xinjiang Brown Cattle	Male	3	muscle	Bisulfite-Seq (RRBS)	36414686	10924405800	37.09	PRJNA1395795	SAMN54371849	SRR36643732
21	L_10ST	loose housing semitendinosus 10	Bos taurus	Xinjiang Brown Cattle	Male	3	muscle	Bisulfite-Seq (RRBS)	35705928	10711778400	37.09	PRJNA1395795	SAMN54371850	SRR36643730
22	L_9ST	loose housing semitendinosus 9	Bos taurus	Xinjiang Brown Cattle	Male	3	muscle	Bisulfite-Seq (RRBS)	30890008	9267002400	40.48	PRJNA1395795	SAMN54371851	SRR36643729
23	L_4ST	loose housing semitendinosus 4	Bos taurus	Xinjiang Brown Cattle	Male	3	muscle	Bisulfite-Seq (RRBS)	32998186	9899455800	39.34	PRJNA1395795	SAMN54371852	SRR36643728
24	L_5ST	loose housing semitendinosus 5	Bos taurus	Xinjiang Brown Cattle	Male	3	muscle	Bisulfite-Seq (RRBS)	37099897	11129969100	39.47	PRJNA1395795	SAMN54371853	SRR36643727
1	T_11ST	tie stalls semitendinosus 11	Bos taurus	Xinjiang Brown Cattle	Male	3	muscle	Bisulfite-Seq (BSAS)	1021220	306366000	36.49	PRJNA1396913	SAMN54406811	SRR36654982	https://dataview.ncbi.nlm.nih.gov/object/PRJNA1396913?reviewer=cjab3in4hks82t2hose6q7edt7	To be released 2027-01-01
2	T_12ST	tie stalls semitendinosus 12	Bos taurus	Xinjiang Brown Cattle	Male	3	muscle	Bisulfite-Seq (BSAS)	794784	238435200	36.79	PRJNA1396913	SAMN54406812	SRR36654981
3	T_13ST	tie stalls semitendinosus 13	Bos taurus	Xinjiang Brown Cattle	Male	3	muscle	Bisulfite-Seq (BSAS)	889642	266892600	35.22	PRJNA1396913	SAMN54406813	SRR36654970
4	T_14ST	tie stalls semitendinosus 14	Bos taurus	Xinjiang Brown Cattle	Male	3	muscle	Bisulfite-Seq (BSAS)	1230790	369237000	35.65	PRJNA1396913	SAMN54406814	SRR36654969
5	T_15ST	tie stalls semitendinosus 15	Bos taurus	Xinjiang Brown Cattle	Male	3	muscle	Bisulfite-Seq (BSAS)	1098953	329685900	34.95	PRJNA1396913	SAMN54406815	SRR36654968
6	T_16ST	tie stalls semitendinosus 16	Bos taurus	Xinjiang Brown Cattle	Male	3	muscle	Bisulfite-Seq (BSAS)	1386382	415914600	36.74	PRJNA1396913	SAMN54406816	SRR36654967
7	T_17ST	tie stalls semitendinosus 17	Bos taurus	Xinjiang Brown Cattle	Male	3	muscle	Bisulfite-Seq (BSAS)	1155697	346709100	35.57	PRJNA1396913	SAMN54406817	SRR36654966
8	T_18ST	tie stalls semitendinosus 18	Bos taurus	Xinjiang Brown Cattle	Male	3	muscle	Bisulfite-Seq (BSAS)	1278678	383603400	36.68	PRJNA1396913	SAMN54406818	SRR36654965
9	T_19ST	tie stalls semitendinosus 19	Bos taurus	Xinjiang Brown Cattle	Male	3	muscle	Bisulfite-Seq (BSAS)	916537	274961100	35.64	PRJNA1396913	SAMN54406819	SRR36654964
10	T_20ST	tie stalls semitendinosus 20	Bos taurus	Xinjiang Brown Cattle	Male	3	muscle	Bisulfite-Seq (BSAS)	1510927	453278100	36.88	PRJNA1396913	SAMN54406820	SRR36654963
11	L_11ST	loose housing semitendinosus 11	Bos taurus	Xinjiang Brown Cattle	Male	3	muscle	Bisulfite-Seq (BSAS)	821114	246334200	35.49	PRJNA1396913	SAMN54406821	SRR36654980
12	L_12ST	loose housing semitendinosus 12	Bos taurus	Xinjiang Brown Cattle	Male	3	muscle	Bisulfite-Seq (BSAS)	1440601	432180300	35.88	PRJNA1396913	SAMN54406822	SRR36654979
13	L_13ST	loose housing semitendinosus 13	Bos taurus	Xinjiang Brown Cattle	Male	3	muscle	Bisulfite-Seq (BSAS)	1197918	359375400	35.72	PRJNA1396913	SAMN54406823	SRR36654978
14	L_14ST	loose housing semitendinosus 14	Bos taurus	Xinjiang Brown Cattle	Male	3	muscle	Bisulfite-Seq (BSAS)	1298149	389444700	36.13	PRJNA1396913	SAMN54406824	SRR36654977
15	L_15ST	loose housing semitendinosus 15	Bos taurus	Xinjiang Brown Cattle	Male	3	muscle	Bisulfite-Seq (BSAS)	914566	274369800	35.97	PRJNA1396913	SAMN54406825	SRR36654976
16	L_16ST	loose housing semitendinosus 16	Bos taurus	Xinjiang Brown Cattle	Male	3	muscle	Bisulfite-Seq (BSAS)	866371	259911300	35.62	PRJNA1396913	SAMN54406826	SRR36654975
17	L_17ST	loose housing semitendinosus 17	Bos taurus	Xinjiang Brown Cattle	Male	3	muscle	Bisulfite-Seq (BSAS)	1372415	411724500	35.32	PRJNA1396913	SAMN54406827	SRR36654974
18	L_18ST	loose housing semitendinosus 18	Bos taurus	Xinjiang Brown Cattle	Male	3	muscle	Bisulfite-Seq (BSAS)	1009477	302843100	35.69	PRJNA1396913	SAMN54406828	SRR36654973
19	L_19ST	loose housing semitendinosus 19	Bos taurus	Xinjiang Brown Cattle	Male	3	muscle	Bisulfite-Seq (BSAS)	862362	258708600	35.72	PRJNA1396913	SAMN54406829	SRR36654972
20	L_20ST	loose housing semitendinosus 20	Bos taurus	Xinjiang Brown Cattle	Male	3	muscle	Bisulfite-Seq (BSAS)	1284890	385467000	35.55	PRJNA1396913	SAMN54406830	SRR36654971

## Sheet: Table S4
Table S4. Sequencing data quality assessments statistics for the sample
SampleID	ReadSum	BaseSum	GC(%)	N(%)	Q20(%)	Q30(%)		Note:
T_10LL	20567306	6156407454	52.29	0	98.01	94.36		ReadSum	Total number of pair-end reads in Clean Data
T_10ST	22340049	6686772236	51.72	0	97.73	93.73		BaseSum	Total base count in Clean Data
T_10SU	19882739	5952102414	52.45	0	97.95	94.27		GC(%)	GC content in Clean Data – the percentage of G and C bases among all nucleotides in Clean Data
T_1LL	19157936	5728831704	52.76	0	97.87	94.11		N(%)	Proportion of ambiguous bases (N) in Clean Data – the percentage of N-containing bases among all sequenced bases
T_1ST	20883372	6247855234	51.25	0	98	94.42		Q20(%)	Percentage of bases achieving Q20 or higher in Clean Data
T_1SU	19242287	5760775090	52.08	0	97.92	94.16		Q30(%)	Percentage of bases achieving Q30 or higher in Clean Data
T_2LL	20085394	6012499134	51.96	0	97.9	94.07
T_2ST	20709757	6197929716	51.83	0	97.91	94.16
T_2SU	19245364	5761701212	51.49	0	97.76	93.75
T_3LL	20687426	6193041126	53.35	0	97.89	94.18
T_3ST	22790490	6822853584	52.49	0	97.8	93.88
T_3SU	19585311	5863675506	51.5	0	97.78	93.76
T_4LL	21445108	6420541538	52.88	0	97.98	94.28
T_4ST	20236608	6057171250	52.1	0	97.87	94.11
T_4SU	22049283	6600738442	51	0	97.95	94.21
T_5LL	21339655	6389030580	53.55	0	97.65	93.54
T_5ST	20001984	5987347146	52.86	0	97.81	93.97
T_5SU	22188178	6634618002	51.7	0	97.89	94.08
T_6LL	22405971	6707805390	53.14	0	97.53	93.25
T_6ST	19803033	5928801630	52.47	0	97.68	93.61
T_6SU	20654507	6181234960	50.93	0	98	94.32
T_7LL	21286857	6373714778	52.6	0	97.74	93.72
T_7ST	19371264	5799059070	52.44	0	97.95	94.23
T_7SU	20773318	6218768646	51.7	0	97.96	94.26
T_8LL	21917173	6562015622	51.71	0	97.89	93.98
T_8ST	20448153	6121267764	51.28	0	97.64	93.51
T_8SU	23255942	6961840354	52.1	0	98	94.39
T_9LL	21289787	6368264816	51.75	0	97.91	94.17
T_9ST	20268820	6066048936	52.5	0	98.01	94.45
T_9SU	21789475	6523362940	52	0	98.04	94.35
L_10LL	22176280	6638470466	53.07	0	97.73	93.74
L_10ST	23111427	6919564586	53.43	0	96.24	90.67
L_10SU	19073217	5710773092	52.13	0	97.86	93.97
L_1LL	20890252	6254091040	52.04	0	97.88	94.06
L_1ST	20225657	6055625706	52.32	0	97.91	94.16
L_1SU	21981196	6581258118	50.42	0	97.84	93.88
L_2LL	20603728	6169329040	53.11	0	98.06	94.48
L_2ST	21034718	6297457732	52.42	0	97.77	93.83
L_2SU	21053940	6303325992	52.21	0	97.66	93.59
L_3LL	19408843	5811607490	53.16	0	97.68	93.62
L_3ST	19940195	5970126358	52.11	0	97.75	93.71
L_3SU	21237832	6353919950	51.81	0	97.91	94.11
L_4LL	24833721	7434962088	53.48	0	97.9	94.16
L_4ST	20684120	6193830466	54.65	0	97.69	93.68
L_4SU	21940788	6568290534	52	0	97.86	93.98
L_5LL	22039997	6599656522	53.82	0	97.03	92.21
L_5ST	21261779	6365514606	51.98	0	97.86	93.97
L_5SU	20851362	6243211950	52.98	0	97.82	93.94
L_6LL	19533598	5848990212	52.7	0	97.76	93.76
L_6ST	20817676	6232862730	52.2	0	97.97	94.26
L_6SU	23048276	6900577966	52.03	0	97.58	93.36
L_7LL	21109585	6316182582	51.88	0	97.76	93.81
L_7ST	20121266	6020195352	50.05	0	97.98	94.31
L_7SU	20947748	6272217624	51.88	0	97.93	94.13
L_8LL	23609646	7069021710	53.08	0	97.9	94.12
L_8ST	21984562	6581518054	53.11	0	97.94	94.22
L_8SU	21053147	6303183290	51.97	0	97.85	93.96
L_9LL	19894259	5956253446	52.18	0	97.8	93.85
L_9ST	21684574	6492414684	53.16	0	97.91	94.17
L_9SU	20035874	5998614916	51.55	0	97.86	93.95

## Sheet: Table S5
Table S5. Alignment statistics of sequencing data against the reference sequence
SampleID	Total Reads	Mapped Reads	Uniq Mapped Reads	Multiple Map Reads	Reads Map to '+'	Reads Map to '-'			Note:
T_10LL	41134612	39,985,233 (97.21%)	38,797,744 (94.32%)	1,187,489 (2.89%)	20,779,806 (50.52%)	20,761,915 (50.47%)			Total Reads	Number of Clean Reads
T_10ST	44680098	43,310,506 (96.93%)	42,245,535 (94.55%)	1,064,971 (2.38%)	22,341,203 (50.00%)	22,318,976 (49.95%)			Mapped Reads	Number of reads aligned to the reference genome and the corresponding percentage within Clean Reads
T_10SU	39765478	38,591,738 (97.05%)	37,585,443 (94.52%)	1,006,295 (2.53%)	19,949,775 (50.17%)	19,917,249 (50.09%)			Uniq Mapped Reads	Number of uniquely aligned reads to the reference genome and the corresponding percentage within Clean Reads
T_1LL	38315872	37,194,883 (97.07%)	36,010,761 (93.98%)	1,184,122 (3.09%)	19,377,285 (50.57%)	19,358,012 (50.52%)			Multiple Map Reads	Multi-mapped read count and its proportion in Clean Reads: Reads aligned to multiple loci in the reference genome
T_1ST	41766744	40,558,910 (97.11%)	39,517,815 (94.62%)	1,041,095 (2.49%)	20,957,207 (50.18%)	20,946,932 (50.15%)			Reads Map to '+'	Count of reads mapped to the reference genome's forward strand and corresponding proportion in Clean Reads
T_1SU	38484574	37,379,254 (97.13%)	36,345,667 (94.44%)	1,033,587 (2.69%)	19,330,621 (50.23%)	19,360,476 (50.31%)			Reads Map to '-'	Count of reads mapped to the reference genome's reverse strand and corresponding proportion in Clean Reads
T_2LL	40170788	39,020,657 (97.14%)	37,950,835 (94.47%)	1,069,822 (2.66%)	20,197,616 (50.28%)	20,184,107 (50.25%)
T_2ST	41419514	40,192,593 (97.04%)	39,035,274 (94.24%)	1,157,319 (2.79%)	20,826,483 (50.28%)	20,805,731 (50.23%)
T_2SU	38490728	37,372,008 (97.09%)	36,372,829 (94.50%)	999,179 (2.60%)	19,320,352 (50.19%)	19,304,069 (50.15%)
T_3LL	41374852	39,650,439 (95.83%)	38,475,064 (92.99%)	1,175,375 (2.84%)	20,564,698 (49.70%)	20,542,787 (49.65%)
T_3ST	45580980	44,143,828 (96.85%)	42,903,476 (94.13%)	1,240,352 (2.72%)	22,869,725 (50.17%)	22,826,931 (50.08%)
T_3SU	39170622	38,053,123 (97.15%)	36,962,431 (94.36%)	1,090,692 (2.78%)	19,729,316 (50.37%)	19,677,406 (50.24%)
T_4LL	42890216	41,697,142 (97.22%)	40,370,756 (94.13%)	1,326,386 (3.09%)	21,675,182 (50.54%)	21,673,375 (50.53%)
T_4ST	40473216	39,314,480 (97.14%)	38,228,347 (94.45%)	1,086,133 (2.68%)	20,330,732 (50.23%)	20,336,075 (50.25%)
T_4SU	44098566	42,908,229 (97.30%)	41,696,448 (94.55%)	1,211,781 (2.75%)	22,193,363 (50.33%)	22,217,997 (50.38%)
T_5LL	42679310	41,353,311 (96.89%)	40,066,767 (93.88%)	1,286,544 (3.01%)	21,520,938 (50.42%)	21,494,218 (50.36%)
T_5ST	40003968	38,778,436 (96.94%)	37,657,800 (94.14%)	1,120,636 (2.80%)	20,113,372 (50.28%)	20,069,834 (50.17%)
T_5SU	44376356	43,082,657 (97.08%)	41,903,227 (94.43%)	1,179,430 (2.66%)	22,298,724 (50.25%)	22,284,312 (50.22%)
T_6LL	44811942	43,398,714 (96.85%)	42,139,377 (94.04%)	1,259,337 (2.81%)	22,514,657 (50.24%)	22,494,883 (50.20%)
T_6ST	39606066	38,407,579 (96.97%)	37,333,958 (94.26%)	1,073,621 (2.71%)	19,901,900 (50.25%)	19,862,182 (50.15%)
T_6SU	41309014	39,854,540 (96.48%)	38,786,190 (93.89%)	1,068,350 (2.59%)	20,596,944 (49.86%)	20,591,989 (49.85%)
T_7LL	42573714	41,353,514 (97.13%)	40,086,697 (94.16%)	1,266,817 (2.98%)	21,479,111 (50.45%)	21,471,230 (50.43%)
T_7ST	38742528	37,640,468 (97.16%)	36,510,440 (94.24%)	1,130,028 (2.92%)	19,546,610 (50.45%)	19,515,717 (50.37%)
T_7SU	41546636	40,393,774 (97.23%)	39,387,015 (94.80%)	1,006,759 (2.42%)	20,830,107 (50.14%)	20,825,121 (50.12%)
T_8LL	43834346	42,643,391 (97.28%)	41,536,431 (94.76%)	1,106,960 (2.53%)	22,046,768 (50.30%)	22,031,656 (50.26%)
T_8ST	40896306	39,648,363 (96.95%)	38,678,366 (94.58%)	969,997 (2.37%)	20,448,246 (50.00%)	20,425,610 (49.94%)
T_8SU	46511884	45,216,562 (97.22%)	44,083,570 (94.78%)	1,132,992 (2.44%)	23,319,794 (50.14%)	23,312,978 (50.12%)
T_9LL	42579574	41,304,568 (97.01%)	40,199,776 (94.41%)	1,104,792 (2.59%)	21,369,927 (50.19%)	21,343,810 (50.13%)
T_9ST	40537640	39,377,836 (97.14%)	38,219,948 (94.28%)	1,157,888 (2.86%)	20,431,179 (50.40%)	20,401,439 (50.33%)
T_9SU	43578950	42,406,468 (97.31%)	41,231,605 (94.61%)	1,174,863 (2.70%)	21,952,145 (50.37%)	21,939,398 (50.34%)
L_10LL	44352560	43,057,383 (97.08%)	41,569,450 (93.73%)	1,487,933 (3.35%)	22,476,747 (50.68%)	22,458,809 (50.64%)
L_10ST	46222854	44,091,025 (95.39%)	42,607,780 (92.18%)	1,483,245 (3.21%)	22,983,402 (49.72%)	23,010,505 (49.78%)
L_10SU	38146434	37,090,633 (97.23%)	35,985,465 (94.34%)	1,105,168 (2.90%)	19,234,990 (50.42%)	19,240,542 (50.44%)
L_1LL	41780504	40,427,458 (96.76%)	39,275,173 (94.00%)	1,152,285 (2.76%)	20,950,964 (50.15%)	20,934,113 (50.10%)
L_1ST	40451314	39,184,319 (96.87%)	38,027,878 (94.01%)	1,156,441 (2.86%)	20,329,019 (50.26%)	20,283,751 (50.14%)
L_1SU	43962392	42,545,324 (96.78%)	41,478,983 (94.35%)	1,066,341 (2.43%)	21,941,567 (49.91%)	21,936,730 (49.90%)
L_2LL	41207456	40,110,515 (97.34%)	38,689,916 (93.89%)	1,420,599 (3.45%)	20,966,379 (50.88%)	20,926,101 (50.78%)
L_2ST	42069436	40,816,611 (97.02%)	39,620,160 (94.18%)	1,196,451 (2.84%)	21,172,184 (50.33%)	21,143,395 (50.26%)
L_2SU	42107880	40,779,729 (96.85%)	39,540,172 (93.90%)	1,239,557 (2.94%)	21,189,048 (50.32%)	21,145,982 (50.22%)
L_3LL	38817686	37,647,798 (96.99%)	36,397,455 (93.77%)	1,250,343 (3.22%)	19,634,183 (50.58%)	19,611,346 (50.52%)
L_3ST	39880390	38,690,637 (97.02%)	37,620,729 (94.33%)	1,069,908 (2.68%)	20,027,365 (50.22%)	20,007,803 (50.17%)
L_3SU	42475664	41,175,813 (96.94%)	39,924,420 (93.99%)	1,251,393 (2.95%)	21,395,283 (50.37%)	21,351,592 (50.27%)
L_4LL	49667442	48,204,475 (97.05%)	46,556,352 (93.74%)	1,648,123 (3.32%)	25,148,890 (50.63%)	25,141,845 (50.62%)
L_4ST	41368240	40,140,852 (97.03%)	38,782,602 (93.75%)	1,358,250 (3.28%)	20,916,992 (50.56%)	20,895,225 (50.51%)
L_4SU	43881576	42,727,907 (97.37%)	41,395,994 (94.34%)	1,331,913 (3.04%)	22,207,382 (50.61%)	22,186,744 (50.56%)
L_5LL	44079994	42,511,717 (96.44%)	40,906,676 (92.80%)	1,605,041 (3.64%)	22,301,539 (50.59%)	22,298,011 (50.59%)
L_5ST	42523558	41,335,348 (97.21%)	40,015,683 (94.10%)	1,319,665 (3.10%)	21,514,142 (50.59%)	21,502,892 (50.57%)
L_5SU	41702724	40,486,033 (97.08%)	39,283,557 (94.20%)	1,202,476 (2.88%)	20,996,552 (50.35%)	21,009,017 (50.38%)
L_6LL	39067196	37,897,137 (97.01%)	36,471,300 (93.36%)	1,425,837 (3.65%)	19,870,957 (50.86%)	19,857,427 (50.83%)
L_6ST	41635352	40,367,220 (96.95%)	39,129,602 (93.98%)	1,237,618 (2.97%)	20,979,898 (50.39%)	20,960,218 (50.34%)
L_6SU	46096552	44,649,779 (96.86%)	43,352,955 (94.05%)	1,296,824 (2.81%)	23,130,911 (50.18%)	23,129,875 (50.18%)
L_7LL	42219170	40,962,707 (97.02%)	39,685,079 (94.00%)	1,277,628 (3.03%)	21,297,873 (50.45%)	21,286,031 (50.42%)
L_7ST	40242532	38,946,364 (96.78%)	37,901,671 (94.18%)	1,044,693 (2.60%)	20,131,471 (50.03%)	20,109,413 (49.97%)
L_7SU	41895496	40,749,121 (97.26%)	39,527,113 (94.35%)	1,222,008 (2.92%)	21,142,653 (50.47%)	21,148,934 (50.48%)
L_8LL	47219292	45,967,084 (97.35%)	44,446,790 (94.13%)	1,520,294 (3.22%)	23,947,533 (50.72%)	23,921,359 (50.66%)
L_8ST	43969124	42,803,188 (97.35%)	41,384,038 (94.12%)	1,419,150 (3.23%)	22,303,754 (50.73%)	22,295,364 (50.71%)
L_8SU	42106294	40,913,413 (97.17%)	39,722,482 (94.34%)	1,190,931 (2.83%)	21,192,126 (50.33%)	21,212,431 (50.38%)
L_9LL	39788518	38,670,965 (97.19%)	37,532,130 (94.33%)	1,138,835 (2.86%)	20,065,788 (50.43%)	20,053,961 (50.40%)
L_9ST	43369148	42,028,928 (96.91%)	40,609,457 (93.64%)	1,419,471 (3.27%)	21,930,235 (50.57%)	21,895,660 (50.49%)
L_9SU	40071748	38,980,774 (97.28%)	37,805,951 (94.35%)	1,174,823 (2.93%)	20,211,460 (50.44%)	20,222,785 (50.47%)

## Sheet: Table S6
Table S6. Statistics of DEGs in L_SU vs. T_SU comparison
#ID	T_10SU Count	T_1SU Count	T_2SU Count	T_3SU Count	T_4SU Count	T_5SU Count	T_6SU Count	T_7SU Count	T_8SU Count	T_9SU Count	L_10SU Count	L_1SU Count	L_2SU Count	L_3SU Count	L_4SU Count	L_5SU Count	L_6SU Count	L_7SU Count	L_8SU Count	L_9SU Count	T_10SU FPKM	T_1SU FPKM	T_2SU FPKM	T_3SU FPKM	T_4SU FPKM	T_5SU FPKM	T_6SU FPKM	T_7SU FPKM	T_8SU FPKM	T_9SU FPKM	L_10SU FPKM	L_1SU FPKM	L_2SU FPKM	L_3SU FPKM	L_4SU FPKM	L_5SU FPKM	L_6SU FPKM	L_7SU FPKM	L_8SU FPKM	L_9SU FPKM	FDR	log2FC	regulated
gene-MARCH3	242	413	316	123	418	270	140	174	503	170	152	172	97	145	139	135	126	64	120	119	3.61709	6.38758	4.90774	1.86524	5.65774	3.60881	2.06265	2.48776	6.4556	2.31172	2.35368	2.33966	1.36152	2.03076	1.85547	1.89918	1.63397	0.908114	1.67911	1.74696	0.000191963	-1.02072	down
gene-RASL10B	67	148	76	45	77	92	59	91	179	48	21	29	28	47	39	19	66	36	50	23	0.5804	1.33009	0.707405	0.390148	0.66612	0.71747	0.533571	0.772159	1.33143	0.447632	0.186797	0.227594	0.22647	0.379972	0.305755	0.151182	0.503443	0.31344	0.44163	0.194538	4.86048e-05	-1.21599	down
gene-TACC1	7357	8780	8104	5584	6511	5671	7334	6784	7328	3868	2551	3511	2522	2593	2368	2678	3338	2761	3190	2942	28.8083	34.5559	33.4193	21.6988	22.5073	20.0497	28.4713	25.8521	23.805	13.5347	10.4407	12.3706	9.14557	9.20865	8.20386	9.82039	11.4681	9.96802	11.9643	11.3868	1.34458e-19	-1.1644	down
gene-ANO5	754	704	760	1242	695	977	912	872	771	1216	1261	2039	2310	2584	1500	1641	2174	1501	1708	2038	5.14281	4.94862	5.36225	8.56683	4.27784	5.94989	6.12542	5.68341	4.4993	7.53924	8.88289	12.6529	14.7596	16.5065	9.15337	10.5358	12.8663	9.69286	10.9206	13.6617	9.14342e-13	1.15197	up
gene-KBTBD13	78	14	49	102	47	80	81	69	92	94	118	209	142	314	199	165	230	154	122	178	0.859182	0.15013	0.558944	1.14222	0.463788	0.787961	0.878902	0.731122	0.868592	0.938872	1.34244	2.10274	1.46834	3.25051	1.96913	1.71713	2.20537	1.61677	1.26592	1.93589	9.91716e-08	1.45105	up
gene-PYGL	1411	2125	2755	1728	2196	1841	1931	2354	3221	1553	845	1161	583	970	1112	1161	982	866	757	814	10.4427	15.1117	19.8264	12.0854	14.2719	12.3459	13.8302	15.5461	19.6737	9.96857	6.12793	7.52156	4.14871	6.65928	7.27551	7.8609	6.07907	5.9099	5.29419	5.38932	3.25936e-14	-1.09567	down
gene-CIPC	9521	5078	5550	4850	10797	8616	5231	8674	8322	5036	2827	2351	3378	5640	3328	3384	2615	2221	2773	2651	67.6294	37.1848	40.7913	34.8265	69.2392	54.6824	36.5893	58.8999	50.5798	32.4926	20.7277	15.1907	22.4649	37.5082	21.1486	22.6185	16.1099	14.9381	18.4593	18.4973	1.60621e-07	-1.0979	down
gene-C5AR1	398	259	154	103	529	133	323	241	483	123	177	140	111	267	106	142	109	51	60	15	3.97055	2.66288	1.58865	1.03186	4.76616	1.18317	3.17159	2.30001	4.12893	1.11471	1.81939	1.27035	1.03262	2.49076	0.943395	1.32778	0.936172	0.477623	0.56052	0.143136	0.0111937	-1.11471	down
gene-CD300LG	836	1338	1411	1420	870	1285	1792	910	1150	1559	2670	2810	2314	1164	1901	1706	2326	2939	2977	2986	7.56921	12.0029	12.7868	12.2273	6.78786	10.0628	15.4505	7.51919	8.6181	12.3348	24.2471	22.1508	19.5092	9.42194	15.1255	13.7439	17.5824	23.9719	24.2222	25.1724	5.91021e-07	1.00901	up
gene-DDX10	613	238	507	232	321	364	254	368	278	297	147	150	124	188	155	91	159	133	164	133	5.24781	2.09725	4.48635	2.00217	2.47752	2.78306	2.1359	3.00875	2.03441	2.30686	1.29206	1.16131	0.993997	1.50264	1.18537	0.733189	1.17791	1.07625	1.30998	1.11811	1.11638e-08	-1.19026	down
gene-PPARGC1A	27666	8757	31234	15525	37067	29537	25989	49923	20617	20135	1329	1692	2190	25622	7005	1902	1486	2269	1987	989	127.442	40.398	145.192	70.2118	147.392	117.192	117.473	218.775	82.1846	85.2339	6.02391	6.77344	9.06042	108.419	27.964	7.89015	5.80897	9.58209	8.13903	4.32124	0.000484291	-2.42455	down
gene-NOTCH3	353	570	671	414	223	440	344	751	746	809	1308	1731	1360	789	901	1242	2094	1885	1518	1449	1.20643	2.01133	2.37879	1.4322	0.688113	1.3448	1.16042	2.45802	2.18663	2.51747	4.62583	5.39469	4.36108	2.52965	2.75974	4.00293	6.22458	6.11426	4.87429	4.87554	3.46951e-12	1.51409	up
gene-SLC43A2	12578	6903	17536	15459	11322	12945	13793	18894	14468	15468	2031	3837	3290	7441	2829	2999	5555	1109	2623	2308	50.8152	26.2872	68.2526	60.8304	38.0428	42.1729	49.6192	72.6797	50.4099	56.505	7.73346	14.0124	11.8795	27.8221	10.9925	11.5841	19.2981	4.04287	9.97082	8.68206	3.48554e-15	-1.96835	down
gene-EFCC1	7	45	35	27	64	45	91	29	44	45	70	91	58	101	53	75	169	173	80	74	0.064865	0.423183	0.331901	0.247544	0.534333	0.367321	0.830075	0.250821	0.346372	0.376924	0.663079	0.76584	0.496195	0.873356	0.434766	0.647564	1.35912	1.51526	0.692836	0.671591	0.000492959	1.19881	up
NewGene_6228	385	269	359	229	395	492	386	300	441	313	144	234	105	245	140	88	184	154	157	135	2.84654	2.04681	2.74598	1.70931	2.63716	3.25511	2.81313	2.1194	2.79439	2.10134	1.09646	1.57558	0.723524	1.69758	0.921006	0.609708	1.17981	1.07509	1.08536	0.97603	8.37498e-10	-1.09191	down
gene-TFCP2L1	166	14	265	150	116	221	185	567	367	830	70	129	48	46	96	120	36	140	46	82	0.520346	0.045254	0.860094	0.475567	0.327417	0.618087	0.571121	1.70336	0.984557	2.38007	0.225725	0.36598	0.140223	0.133265	0.269564	0.353037	0.095602	0.415149	0.134724	0.251937	0.000364001	-1.7008	down
gene-GRIP2	381	296	316	269	190	351	331	338	322	340	473	817	680	887	867	430	897	741	574	588	2.07506	1.65038	1.90809	1.44954	0.941159	1.66028	1.72905	1.80002	1.46294	1.75576	2.59668	4.04027	3.5561	4.46386	4.24865	2.18243	4.20139	3.98704	3.12163	3.17386	1.90724e-16	1.22267	up
gene-LDB2	111	121	56	113	93	52	139	199	107	120	279	699	420	350	445	374	499	315	270	307	1.14462	1.27496	0.62369	1.1999	0.888322	0.458726	1.40438	1.98677	0.957484	1.13666	3.03552	6.73645	4.30095	3.56224	4.23686	3.6973	4.68556	3.16716	2.69906	3.13299	1.15734e-18	1.90468	up
gene-SLCO2B1	198	270	418	442	274	459	500	347	566	359	911	938	567	669	928	1089	780	875	881	544	1.35226	1.90255	2.95517	3.04998	1.68954	2.80038	3.36187	2.26464	3.30998	2.2236	6.42475	5.83218	3.62378	4.28092	5.67144	7.00209	4.62104	5.65922	5.63952	3.64909	5.64382e-11	1.19069	up
gene-ADORA2B	798	636	322	299	867	354	365	495	566	219	195	307	248	255	263	317	247	129	171	133	12.1342	9.80183	5.08845	4.612	11.9139	4.80156	5.39685	7.13227	7.41319	3.0052	3.06376	4.2671	3.5281	3.64332	3.49584	4.55271	3.25652	1.86225	2.44516	1.99262	0.000125503	-1.04126	down
gene-LOC515418	40	39	25	18	25	29	80	44	43	28	135	131	31	98	37	60	94	55	25	35	0.238254	0.22906	0.148873	0.102878	0.126788	0.14952	0.598099	0.239816	0.21044	0.17893	1.04003	0.708346	0.163815	0.522187	0.190227	0.318432	0.669809	0.292403	0.133026	0.199643	0.0110586	1.00229	up
gene-LOC786948	75	101	37	9	120	57	156	294	136	62	192	462	312	508	403	438	298	264	248	240	1.95339	2.70904	0.986923	0.238114	2.82464	1.32323	4.00495	7.34295	3.04935	1.46938	5.1815	11.0066	7.63947	12.4503	9.42701	10.7838	6.75853	6.55003	6.08614	6.16343	3.00199e-06	1.80068	up
gene-NAV3	7	54	79	37	47	54	110	98	57	102	190	176	121	148	62	129	216	122	112	112	0.016957	0.143093	0.213589	0.097394	0.109205	0.126773	0.288893	0.245131	0.126635	0.24255	0.512947	0.428855	0.301912	0.365798	0.145866	0.326403	0.496202	0.3069	0.275916	0.287555	0.000424539	1.20159	up
NewGene_8382	423	331	546	480	329	577	331	477	631	444	151	228	177	247	203	125	208	204	328	182	3.65015	2.94231	4.87481	4.18111	2.56104	4.44257	2.81049	3.93124	4.65334	3.47717	1.33998	2.23439	1.42781	1.99537	1.56314	1.01406	1.55178	1.66117	2.64746	1.54158	2.88485e-10	-1.06919	down
NewGene_8031	43	50	41	58	141	41	115	58	114	154	195	147	113	117	158	101	204	211	204	105	0.213133	0.256804	0.221397	0.307637	0.677731	0.201174	0.564689	0.295545	0.576169	0.956938	1.20125	0.698396	0.524905	0.605225	0.740149	0.514093	0.951984	1.01017	1.13678	0.51839	0.000595135	1.03249	up
gene-SEPT6	129	191	164	209	169	174	175	260	237	157	377	527	295	333	352	313	398	373	310	272	0.972483	1.70666	1.32511	1.59094	1.22774	1.4257	1.4016	2.25044	1.66737	1.14306	3.16145	4.14128	2.18237	2.83336	2.47512	2.67541	3.1122	2.87028	2.21915	2.10769	2.66831e-15	1.01321	up
gene-FSTL3	1095	1551	950	312	974	958	491	1655	1624	583	209	309	250	644	235	323	328	209	236	150	15.4198	22.52	13.8501	4.4375	12.3829	12.0526	6.81231	22.2835	19.5809	7.45108	3.03298	3.96078	3.2966	8.49509	2.94987	4.28248	4.00934	2.77878	3.10867	2.06788	2.28774e-09	-1.72159	down
gene-ATP1A1	5277	9194	4613	5199	10519	5137	4546	6777	7777	3632	1876	2996	2241	2562	4394	2653	2919	2123	5545	2099	40.0525	71.9429	36.2333	39.8958	72.0804	34.8352	33.9769	49.1718	50.5125	25.0435	14.7013	20.6886	15.9264	18.2073	29.8361	18.9452	19.2207	15.2589	39.4465	15.6492	1.594e-05	-1.00769	down
gene-SLC25A33	4984	1798	2597	1502	3221	2712	2162	3777	2626	1984	454	456	521	2100	1043	452	421	258	601	237	91.2846	33.9436	49.2091	27.8078	53.2462	44.3829	38.9823	66.1182	41.1541	32.9987	8.56838	7.5896	8.93273	36.0092	17.0755	7.78013	6.68317	4.4656	10.2997	4.25143	5.31656e-07	-1.97657	down
gene-CR2	135	130	79	67	278	143	320	274	209	69	631	389	222	669	296	447	256	228	171	107	0.706561	0.703705	0.479453	0.354273	1.31802	0.671215	2.16787	1.37816	0.940249	0.330189	4.60258	2.53049	1.0931	4.35189	1.73267	3.00564	1.59169	1.49297	0.840421	0.564114	0.00385611	1.1256	up
gene-HES6	136	84	54	49	67	62	60	98	134	49	15	8	8	40	24	35	36	19	39	10	2.1748	1.41234	0.920604	0.574937	0.855941	0.910292	0.87568	1.32499	1.58716	0.514397	0.17998	0.084917	0.077503	0.490698	0.240142	0.435851	0.515869	0.208241	0.597404	0.112505	1.96994e-06	-1.67954	down
gene-MAMSTR	97	196	184	196	289	212	291	213	186	228	551	650	427	281	423	293	943	605	654	655	1.1075	2.69526	2.25073	2.52095	3.23977	2.48744	3.71649	2.63395	2.39354	2.8548	7.08547	8.36498	5.32351	3.42559	5.13561	3.93603	11.7581	8.44991	8.13101	9.10174	7.54891e-12	1.46515	up
gene-PDGFRB	633	1545	1363	1211	913	1076	1380	1976	1399	1132	3135	3415	2656	2278	1791	3388	4625	3185	3171	2051	3.03675	9.43457	7.95261	6.06053	4.58537	5.81423	6.95245	11.3784	6.83149	5.31656	16.2538	17.5489	12.3399	10.6665	8.40513	16.7883	20.8872	14.732	15.9331	10.0624	8.79235e-14	1.31473	up
NewGene_9756	420	33	207	111	180	52	217	278	141	182	18	23	29	26	42	18	8	22	5	6	7.9131	0.542588	3.47222	1.79417	3.53053	0.736498	3.44816	5.23469	2.44202	2.65021	0.29438	0.328005	0.429458	0.388757	0.874961	0.257897	0.109498	0.374693	0.070694	0.094752	9.01647e-13	-3.11763	down
gene-SEMA6C	2811	1451	1956	2955	1705	3278	2166	3110	4947	3801	3815	6955	7050	7204	5349	5049	6303	5651	6091	5920	18.7855	9.7054	13.218	19.7407	10.5139	19.6934	14.9969	19.702	28.1275	24.5817	26.1474	43.5955	45.0764	47.6325	33.8686	32.3839	36.3898	38.0046	39.0165	39.13	1.9108e-10	1.17443	up
gene-CARNS1	813	249	481	475	311	1001	325	800	626	737	1316	1594	1431	1800	1369	1080	1338	1281	815	1227	5.46238	1.78703	3.38928	3.20581	1.87372	6.10947	2.16233	5.25598	3.6853	4.6844	9.38603	9.76564	9.09515	11.2718	8.18304	6.79058	7.7818	8.20179	5.24769	8.19689	8.29357e-08	1.28064	up
gene-LRRC2	24784	15036	25242	14724	26777	20959	15040	31175	24690	18091	5675	9467	9165	12502	10383	8704	10432	8793	5812	8278	64.3095	39.5594	67.4043	36.2945	61.5432	46.6049	37.5832	78.5062	55.9014	43.5337	15.1021	20.7396	20.623	28.2612	23.0097	20.9229	22.4321	20.6091	13.432	20.5562	2.72885e-13	-1.19073	down
NewGene_11495	1172	1206	666	578	1958	745	1206	1148	938	894	181	570	310	448	475	433	726	550	535	506	7.34766	8.78024	5.65035	4.01222	12.1296	4.80457	8.01155	7.705	5.79733	4.78147	1.36694	4.23706	2.24112	3.03402	3.57681	3.15772	5.18506	4.2876	4.1552	4.02954	1.58562e-06	-1.08695	down
gene-FAM107A	8855	11093	8519	5599	9609	5792	5895	7687	9518	4968	3497	4181	3339	1936	3202	3776	3144	3179	3429	2315	74.6933	96.5035	73.7877	47.7196	73.3044	43.4197	48.7698	62.0039	68.2193	37.9356	30.4688	31.7492	26.3823	15.2755	24.1604	29.5704	22.8324	25.336	26.8872	19.3799	4.42509e-12	-1.18913	down
gene-LRRC17	0	18	38	24	16	46	47	15	27	19	178	198	65	73	90	108	301	88	79	56	0	0.251269	0.547093	0.338963	0.198624	0.575453	0.637257	0.195466	0.317443	0.23953	2.57471	2.5276	0.850115	0.959605	1.12154	1.42628	3.65903	1.16628	1.03945	0.766511	4.4692e-08	2.35952	up
gene-RERG	28	36	98	71	37	49	46	82	60	57	121	149	134	103	74	118	173	125	133	95	0.301616	0.409464	1.12482	0.797296	0.364856	0.485145	0.496413	0.863314	0.570796	0.575709	1.38721	1.50655	1.39246	1.06463	0.728105	1.23626	1.66594	1.31399	1.38878	1.03672	1.23042e-07	1.1984	up
gene-FBLN7	31	662	79	36	200	122	197	208	1217	16	64	94	29	28	65	74	109	50	101	58	0.383704	8.49508	1.01743	0.448504	2.24093	1.35409	2.40792	2.47272	12.9629	0.177103	0.821648	1.05778	0.32939	0.318939	0.719411	0.855172	1.17157	0.583831	1.17621	0.708778	0.00555071	-1.89892	down
NewGene_14076	48	88	119	168	47	125	155	102	65	109	252	461	257	84	100	161	266	292	135	157	0.194457	0.404615	0.721649	0.804935	0.231132	0.560329	0.689134	0.651074	0.25769	0.467477	2.09731	2.24221	1.50474	0.465442	0.382928	1.01392	1.6096	1.97008	0.745024	1.25681	0.000766222	1.13189	up
gene-WNT5A	11	78	73	51	71	157	176	121	91	60	303	338	44	171	239	358	498	218	141	256	0.037959	0.426007	0.349655	0.186092	0.491857	0.679583	0.690038	0.659921	0.28116	0.403064	1.63039	1.81986	0.655667	1.00106	1.11264	2.01304	2.32138	1.29881	0.701959	1.35765	4.88236e-05	1.61187	up
NewGene_9848	25	61	43	45	4	42	34	28	10	39	129	57	30	141	14	10	172	84	21	104	0.104996	0.269968	0.192885	0.196876	0.01561	0.161949	0.143802	0.115432	0.034913	0.152345	0.577564	0.223266	0.121236	0.573758	0.051657	0.038912	0.647869	0.346092	0.084349	0.443594	0.0326148	1.25366	up
gene-SOX7	432	240	586	484	398	373	416	296	369	371	791	844	590	652	651	1187	848	797	825	888	3.35208	1.91806	4.70648	3.80063	2.78857	2.58359	3.17743	2.19736	2.45252	2.61617	6.34369	5.96399	4.28862	4.73819	4.52273	8.66933	5.7083	5.86209	5.99868	6.77076	2.70871e-10	1.10524	up
gene-LOC788175	87	25	13	61	29	47	36	59	109	43	153	123	141	69	90	213	130	112	53	116	0.848068	0.246457	0.12686	0.601387	0.248583	0.409278	0.34148	0.548677	0.908925	0.380973	1.53425	1.08785	1.27922	0.621562	0.781596	1.94818	1.09733	1.03239	0.477705	1.10725	0.000146947	1.35031	up
gene-TPSB2	25	69	46	9	19	14	27	169	30	24	84	271	67	135	182	129	94	58	71	42	0.598738	1.74026	1.15659	0.220571	0.411641	0.291229	0.643395	3.98925	0.619657	0.524696	2.12329	6.0927	1.5387	3.11862	4.01182	2.98401	2.00946	1.33841	1.62889	1.0023	0.00293377	1.47826	up
gene-UCN	420	148	87	43	192	185	150	180	254	68	30	36	45	172	89	30	36	42	58	34	9.16848	3.3901	1.91579	0.913493	3.68319	3.44994	3.11621	3.60597	4.6954	1.29465	0.634547	0.741013	0.891092	3.44129	1.75763	0.579236	0.675321	0.836534	1.16905	0.693364	0.000490284	-1.50317	down
NewGene_15379	22	103	40	63	31	61	61	130	58	47	136	163	89	77	32	139	157	121	141	141	0.21843	1.08342	0.418912	0.653691	0.280949	0.559977	0.602289	1.27055	0.505743	0.436931	1.43913	1.52162	0.845969	0.739091	0.288036	1.34044	1.39338	1.17579	1.35539	1.42638	0.00211583	1.04651	up
gene-EDNRB	1113	1506	626	431	1953	445	476	996	1092	388	360	576	386	319	390	285	385	359	316	223	8.70295	12.0564	5.19843	3.38784	13.9713	3.33612	3.96502	7.4138	7.70124	2.84405	3.18368	4.07005	2.95641	2.45307	3.15268	2.23189	2.94959	2.78691	2.28149	1.71977	2.35644e-05	-1.24628	down
NewGene_11275	21	12	51	7	41	14	16	17	13	4	42	103	283	65	60	84	62	77	351	78	0.11577	0.066813	0.291486	0.034046	0.205375	0.069139	0.083826	0.087567	0.057696	0.02036	0.239295	0.523234	1.48433	0.337179	0.300225	0.439469	0.299645	0.406711	1.84397	0.429572	2.8011e-08	2.71241	up
gene-LOC618289	62	41	70	55	61	21	102	48	65	32	8	64	8	26	17	12	45	21	54	12	0.345875	0.231998	0.402327	0.305608	0.306579	0.100602	0.560913	0.254517	0.308287	0.162348	0.046238	0.325656	0.036869	0.13198	0.082496	0.062471	0.21439	0.108602	0.282777	0.064244	0.0177032	-1.03774	down
NewGene_6380	23	71	88	48	56	96	45	57	73	57	36	46	3	17	6	15	56	42	26	14	0.135522	0.435977	0.545016	0.286352	0.301871	0.513141	0.264971	0.322433	0.374428	0.309368	0.218627	0.251506	0.01484	0.091019	0.031619	0.082823	0.29051	0.236538	0.145246	0.082743	0.00601352	-1.18243	down
gene-CDH6	14	28	20	30	8	28	20	21	12	41	87	167	73	25	67	49	207	97	103	85	0.045013	0.095188	0.067287	0.101357	0.024127	0.083079	0.065332	0.065735	0.032618	0.122871	0.300854	0.508792	0.227737	0.077734	0.200801	0.152697	0.641647	0.307735	0.322679	0.288065	8.37498e-10	2.14957	up
gene-PTDSS2	5356	1651	6631	3497	4550	3973	3807	5235	6916	4812	1727	2039	2033	1997	2372	2325	1155	2656	1786	1677	59.6037	21.2903	80.4524	44.9414	50.4269	43.7218	47.0737	62.5223	66.9876	55.5592	22.1071	23.1939	23.2855	23.7279	26.8667	25.376	12.2265	30.9473	21.1668	20.8634	1.20145e-07	-1.12255	down
gene-C1QTNF2	12	28	20	5	21	14	18	30	30	30	141	156	141	125	70	136	179	83	49	109	0.28066	0.667148	0.477571	0.096566	0.451115	0.278508	0.41731	0.677233	0.60264	0.644816	3.47586	3.36778	3.13133	2.77502	1.48097	3.04068	3.69183	1.87072	1.09331	2.54435	1.1943e-20	2.61789	up
gene-C1QTNF6	19	109	104	42	107	42	105	99	219	56	253	359	114	134	120	182	496	132	113	100	0.188385	1.13996	1.08602	0.415169	0.987	0.380971	1.05153	0.962652	1.9158	0.511607	2.66636	3.33632	1.08521	1.28205	1.09316	1.75165	4.39861	1.26984	1.0851	0.999811	0.00160084	1.23125	up
gene-DNAH17	166	99	110	45	70	42	41	164	89	77	12	22	11	30	19	23	46	20	75	17	0.339079	0.207381	0.230574	0.092404	0.127608	0.075437	0.081082	0.317258	0.154823	0.141053	0.025081	0.038971	0.019577	0.056078	0.033012	0.042397	0.079763	0.036701	0.142149	0.032429	2.14638e-05	-1.6589	down
gene-GCNT4	417	3754	1369	342	4571	407	1164	666	991	838	174	253	317	202	433	380	445	560	1351	575	1.38593	15.5863	5.4511	1.14823	14.3811	1.20785	4.4636	2.78009	2.8196	2.53303	0.59535	1.12528	1.41343	0.631527	1.31256	1.19817	1.88655	2.58538	4.24695	1.99628	0.00810096	-1.54705	down
gene-CCDC8	145	289	363	238	148	204	397	231	308	296	680	586	332	514	240	424	813	730	454	622	1.51543	3.1185	3.93541	2.51566	1.3941	1.91105	4.09625	2.31487	2.75625	2.8206	7.36123	5.59103	3.25292	5.04061	2.24887	4.18103	7.39498	7.24274	4.45643	6.40929	1.58174e-06	1.12693	up
gene-MAML3	24	30	31	45	7	6	44	39	31	17	58	48	74	47	55	49	55	34	60	50	0.083768	0.109513	0.115056	0.163269	0.022013	0.018733	0.15474	0.1331	0.09378	0.055715	0.213764	0.157079	0.248449	0.158582	0.175201	0.16462	0.177035	0.115936	0.200622	0.1759	0.00346677	1.04367	up
gene-RASGEF1A	157	385	116	42	432	58	61	186	119	93	32	69	79	110	72	114	96	45	64	77	1.33052	3.25212	0.963003	0.341679	3.26185	0.418234	0.47284	1.5045	0.862236	0.677872	0.267159	0.507783	0.591957	0.831487	0.510832	0.86865	0.665959	0.342444	0.4847	0.607173	0.0183782	-1.04189	down
NewGene_2045	22	0	32	50	4	55	41	10	54	22	161	115	82	318	23	157	127	11	8	35	0.140639	0	0.444776	0.323159	0.023091	0.536946	0.255367	0.059298	0.740291	0.122023	1.4336	0.854536	0.610812	1.99895	0.12673	1.06621	0.812278	0.066612	0.047944	0.216269	0.00638816	1.9287	up
NewGene_13379	16	13	25	21	52	45	57	13	14	9	63	41	23	19	88	91	87	45	141	39	0.384774	0.28374	0.524668	0.583367	1.29491	1.09728	1.64733	0.534171	0.261686	0.207457	1.70393	0.905571	0.518051	0.375227	2.02317	1.97599	2.07048	1.21803	3.19853	1.03189	0.00417628	1.34022	up
gene-FGFR3	80	63	125	112	127	212	203	133	160	171	134	260	344	175	263	420	330	324	278	236	0.461315	0.384869	0.755276	0.657417	0.685599	1.29435	1.41054	0.924089	0.794027	1.07313	0.808075	1.51072	2.05453	0.961381	1.45495	2.55515	1.8532	2.13936	1.52765	1.47475	3.87409e-06	1.08949	up
gene-FGFR4	32	69	69	111	6	79	51	45	132	63	331	365	240	298	161	193	350	225	406	245	0.275114	0.619602	0.616111	0.972946	0.044469	0.61067	0.432625	0.365026	0.973399	0.490009	3.01216	2.93737	1.94383	2.48266	1.27576	1.59785	2.67385	1.87721	3.35722	2.1155	2.3456e-11	2.18546	up
gene-ZNF570	207	207	376	249	270	320	333	361	313	259	82	278	103	118	91	74	200	144	181	89	0.894603	0.924252	1.73639	1.0912	1.05804	1.2608	1.466	1.5188	1.1592	1.02105	0.365493	1.09506	0.41727	0.477627	0.35285	0.321278	0.750631	0.591241	0.735102	0.375496	1.33003e-06	-1.0355	down
gene-SIPA1L2	138	134	133	70	106	102	130	165	129	115	261	345	119	155	225	337	272	358	303	224	0.556407	0.535513	0.533453	0.273265	0.371896	0.354765	0.512808	0.617852	0.429737	0.404172	1.09862	1.2874	0.429734	0.588448	0.781693	1.23423	0.947157	1.43457	1.1587	0.891368	3.18438e-09	1.17201	up
gene-MYH11	568	4572	2277	1744	1274	1282	1214	2176	2191	1114	1537	5949	2058	2051	3356	3180	7686	5085	3031	2374	2.36448	19.8322	9.88619	7.384	4.8279	4.80508	5.01506	8.73112	7.84042	4.24934	6.64945	22.6804	8.08541	8.0577	12.6098	12.5433	27.9624	20.2423	11.9349	9.78422	0.00287953	1.01418	up
NewGene_14809	119	161	186	206	96	198	130	268	130	139	128	68	59	108	30	30	87	101	61	52	0.425536	0.592895	0.689548	0.746378	0.307905	0.632374	0.457217	0.915626	0.397951	0.449727	0.471786	0.219557	0.271766	0.36116	0.096106	0.100164	0.267734	0.340419	0.202015	0.180118	0.00027603	-1.08499	down
gene-NGFR	14	34	69	4	32	8	29	70	46	26	43	51	110	98	43	69	63	110	79	91	0.115606	0.289705	0.591242	0.033489	0.238532	0.056534	0.229533	0.547944	0.320295	0.188265	0.365041	0.381411	0.849106	0.759219	0.317522	0.53164	0.446857	0.8616	0.610442	0.740305	0.00206944	1.31482	up
gene-AQP1	18400	43398	26596	13712	41860	17781	15913	27122	39702	25553	5162	7328	8590	6495	8909	10640	8531	9905	14010	8810	190.575	463.413	285.059	143.577	391.408	164.556	162.3	268.551	351.873	240.42	55.1969	69.0482	83.3125	62.9841	82.5438	103.691	76.6529	97.1511	135.997	89.6597	8.45692e-12	-1.50883	down
gene-AQP4	422	616	647	486	616	837	1002	401	487	577	1820	1727	1853	1075	1068	1876	2401	2659	1932	2517	2.04496	3.07567	3.03532	2.22557	2.69285	3.6254	4.77833	1.85569	1.88975	2.37497	9.10499	7.6142	8.40615	4.56304	4.32903	8.55749	10.0828	12.1995	8.63819	11.844	2.90323e-17	1.72285	up
gene-TSPAN5	199	254	135	51	98	75	100	254	217	84	43	79	28	48	70	104	101	65	41	30	3.77245	4.95486	2.63877	0.971692	1.66569	1.27114	1.86751	4.60071	3.51412	1.43715	0.826027	1.36366	0.48551	0.850642	1.1725	1.8543	1.65663	1.15459	0.714091	0.541515	0.000501001	-1.1957	down
gene-TRIM63	63975	18212	44618	13013	28877	33244	21365	41271	40215	17279	3675	5216	5225	23417	10661	6781	4681	5279	6454	4548	1004.12	294.703	724.669	206.488	409.14	466.439	330.179	619.235	540.071	246.34	59.531	74.4668	76.7745	344.107	149.679	100.141	63.736	78.458	94.936	70.1467	3.32633e-07	-1.99558	down
gene-PIH1D2	120	83	48	85	61	69	120	18	95	64	32	47	31	59	24	33	42	39	33	21	2.74684	1.93873	1.11549	1.95375	1.24254	1.39945	2.69426	0.389827	1.84702	1.32848	0.738054	0.961996	0.649384	1.25904	0.477836	0.695452	0.826534	0.823909	0.705979	0.47145	0.00142887	-1.01797	down
gene-ASAP3	22	65	45	0	32	25	51	47	40	37	59	87	74	61	75	64	110	104	64	63	0.263082	0.806469	0.560106	0	0.349102	0.263569	0.608942	0.546382	0.410779	0.402527	0.740255	0.959561	0.838124	0.692783	0.813383	0.72435	1.16122	1.19909	0.726366	0.7483	0.00174005	1.15283	up
gene-FOXO1	9990	3511	7481	5648	7231	9057	5393	6498	10983	4501	1194	4216	3026	7648	4020	4003	2792	850	2095	1579	48.3332	17.5099	37.4544	27.6246	31.5839	39.1544	25.6952	30.0521	45.4709	19.7803	5.96338	18.5535	13.7064	34.6442	17.3986	18.2243	11.7168	3.89233	9.49558	7.50671	0.00131844	-1.08153	down
gene-TMEM201	3937	1156	2721	2489	1888	2893	2563	4210	3012	3664	1040	1087	1086	2413	1342	1093	1081	1109	1082	1039	26.0003	8.04494	18.7615	16.5353	11.2803	17.0792	16.6184	26.7794	17.0182	22.0152	7.24056	6.62762	6.74393	15.1755	7.88557	7.05687	6.48078	7.08039	6.693	6.84936	5.40763e-07	-1.11139	down
gene-SLCO5A1	230	456	205	401	822	298	511	382	349	650	654	695	592	573	697	696	761	1204	1354	912	0.695385	1.42278	0.640524	1.22657	2.2462	0.806087	1.52336	1.10556	0.902993	1.78961	2.04543	1.91481	1.67854	1.62603	1.88877	1.98412	2.01613	3.49315	3.84547	2.72034	9.65019e-05	1.01	up
gene-ATP1B3	2236	1551	1107	694	1749	1074	750	1278	1575	678	625	645	411	682	618	462	555	484	553	371	41.2614	29.5116	21.0396	12.8876	29.0098	17.6215	13.5629	22.4437	24.91	11.3146	11.9657	10.767	7.05753	11.7254	10.1503	7.97697	8.83285	8.47138	9.50991	6.69566	2.64235e-07	-1.14871	down
gene-CALHM5	110	152	244	399	71	273	341	206	286	352	658	639	351	239	424	719	668	447	476	403	1.0846	1.56486	2.50036	4.08351	0.630275	2.41975	3.39675	1.94834	2.46511	3.25696	6.80501	5.89229	3.31374	2.21915	3.78348	6.84006	5.86078	4.27924	4.50098	3.97784	0.000146252	1.1269	up
gene-DGKD	6578	2789	7548	3249	3858	4208	3859	6897	5769	5414	1497	2083	1994	3425	2540	2252	2764	2327	2712	1933	36.9692	16.1656	43.9935	18.4689	19.656	21.2671	21.4031	37.7113	27.9943	28.1053	8.67339	10.6226	10.4861	18.0495	12.7724	12.0023	13.4828	12.3593	14.3657	10.6608	7.82364e-08	-1.00797	down
gene-LOC112449293	30	66	86	72	160	23	79	27	69	54	132	105	110	146	290	94	239	342	95	210	0.274013	0.629448	0.859746	0.691559	1.33325	0.187499	0.71558	0.238701	0.548568	0.44982	1.42214	0.890397	0.97887	1.26542	2.5435	0.817735	1.97434	3.28973	0.89733	2.14648	6.6313e-05	1.48542	up
gene-LOC100298356	242	137	346	94	263	115	204	386	159	126	73	63	43	128	30	56	61	75	212	100	2.37778	1.38358	3.51555	0.933444	2.3296	1.00197	1.97257	3.62023	1.33128	1.12319	0.734169	0.555564	0.387923	1.17619	0.263356	0.513689	0.520075	0.696788	1.95355	0.959839	0.0011007	-1.205	down
gene-NRK	17	25	53	33	60	19	59	27	33	19	112	57	70	64	42	60	143	41	51	52	0.055533	0.08181	0.182357	0.109947	0.177719	0.053153	0.191927	0.081134	0.087908	0.053562	0.381992	0.170187	0.217955	0.198478	0.12292	0.185338	0.413298	0.12833	0.15511	0.169999	0.00164226	1.08507	up
gene-PTX3	6291	1038	1295	106	3731	581	361	1709	2497	112	18	35	53	47	26	51	33	4	2	23	94.4579	16.0692	20.1168	1.60634	50.5741	7.7908	5.33727	24.5283	32.0816	1.52625	0.267714	0.477602	0.745113	0.647822	0.344805	0.707823	0.419223	0.056314	0.028054	0.325205	5.74352e-17	-5.84309	down
gene-DUSP10	962	1101	878	396	2120	1016	1616	1391	1617	1112	2576	2153	1704	1700	2488	1928	1259	2541	5734	2138	10.3244	12.1768	9.7462	4.29224	20.5402	9.74102	17.0762	14.2718	14.8527	10.8389	28.5519	21.0227	17.1299	17.0873	23.8882	19.4734	11.7164	25.8265	57.6849	22.5502	0.000106929	1.10723	up
gene-DUSP18	84	143	90	89	143	63	74	106	81	93	29	69	36	0	41	71	45	45	0	49	0.753826	1.31676	0.829736	0.80059	1.15676	0.500348	0.649562	0.905668	0.616207	0.756143	0.265762	0.556751	0.299154	0	0.322943	0.595449	0.342972	0.376596	0	0.425035	0.0278679	-1.25217	down
NewGene_15283	141	163	161	56	129	117	76	204	84	90	34	52	42	67	55	55	60	54	66	55	1.41038	1.68408	1.66328	0.568831	1.16081	1.04167	0.748431	1.95283	0.718213	0.818211	0.344821	0.466995	0.392337	0.621155	0.487278	0.510389	0.515929	0.512015	0.616592	0.535204	5.40898e-06	-1.09573	down
gene-C4H7orf31	143	96	106	31	106	21	92	82	33	51	11	56	4	7	76	10	53	24	37	32	1.7912	1.23792	1.36658	0.383215	1.19652	0.233237	1.1366	0.982591	0.348609	0.572859	0.142055	0.638237	0.037673	0.074711	0.852303	0.113721	0.566754	0.279354	0.427281	0.390116	0.0183061	-1.26662	down
gene-LOC404103	100	68	62	42	126	40	72	99	44	25	164	197	172	198	315	198	177	132	66	131	2.97174	2.08531	1.92666	1.26179	3.35634	1.01069	2.041	2.74831	1.04455	0.561826	5.10662	5.41104	4.88498	5.372	8.51586	5.55848	4.61937	3.71286	1.85991	3.76329	3.3227e-06	1.45241	up
NewGene_1481	117	36	60	167	63	94	92	81	33	92	147	250	120	228	110	198	251	72	95	224	1.01708	0.345096	0.645589	1.97415	0.504558	0.81687	0.828875	0.665791	0.284593	0.772148	1.37641	2.21868	0.968998	1.97874	1.01075	1.68218	2.3379	0.603734	0.849468	2.06974	0.00183575	1.0659	up
gene-SYNPO2	4009	7625	8177	6053	6723	9601	6926	5000	10467	8810	15864	13788	11122	12214	11122	18769	16326	14956	10542	19620	15.2063	33.4805	38.7806	33.5268	23.0215	32.5398	33.7175	21.7673	41.7015	40.6757	62.1292	61.7637	41.963	45.6839	42.5254	92.8807	73.3388	57.0787	42.6556	73.1261	8.78174e-10	1.08288	up
gene-LOC534578	12	27	26	24	25	11	28	22	28	0	66	46	52	54	98	39	105	53	61	42	0.10557	0.250286	0.242185	0.216933	0.201051	0.082536	0.243284	0.186984	0.212302	0	0.613871	0.372269	0.431702	0.456496	0.791117	0.32426	0.816368	0.445942	0.509665	0.369334	4.89916e-06	1.68108	up
gene-DEPP1	1453	1613	1459	141	1440	308	269	969	729	338	135	381	202	298	200	486	369	117	457	392	45.5683	52.1559	47.3534	4.44679	40.7688	8.6111	8.29229	29.0419	19.559	9.6252	4.36468	10.873	5.916	8.74312	5.59945	14.3332	10.0434	3.4624	13.4204	12.065	0.00300866	-1.45506	down
gene-PTCH2	10	27	18	35	12	23	31	58	51	35	62	79	30	33	29	85	92	94	76	66	0.059001	0.167557	0.111259	0.209354	0.061141	0.120337	0.182459	0.333081	0.262779	0.185342	0.383755	0.463157	0.170755	0.185394	0.155757	0.489067	0.487753	0.56394	0.431206	0.404079	0.000597211	1.2014	up
gene-AKAP12	3340	3423	2456	864	11072	2437	1757	4340	5759	1039	817	2003	1747	2333	2300	1050	1404	893	984	1062	11.6355	12.1982	8.85569	2.93018	34.6274	7.57017	5.97214	14.4441	17.041	3.26509	2.82948	6.11371	5.48801	7.32785	7.10355	3.41514	4.20337	2.92371	3.20939	3.50001	0.00614355	-1.21903	down
gene-SLC28A1	188	187	154	29	263	119	116	90	149	30	24	5	17	14	17	65	60	24	60	44	1.5005	1.41854	1.17291	0.229168	1.76475	0.796142	0.852746	0.67441	0.920579	0.197046	0.173569	0.028474	0.121091	0.091559	0.10975	0.44765	0.383431	0.160248	0.412206	0.308053	4.25992e-05	-1.92134	down
gene-MT1A	1462	305	1544	69	518	118	38	127	495	51	10	17	9	38	15	20	18	4	17	13	96.8359	18.8511	108.096	4.36174	30.6987	6.43681	2.29435	7.58754	28.1674	2.78807	0.638409	1.03794	0.424185	2.17159	0.752338	1.0217	0.856359	0.20941	0.989362	0.81829	5.94213e-13	-4.82948	down
NewGene_8087	43	110	69	42	99	37	45	86	70	96	27	64	38	5	21	13	23	38	39	42	0.499852	1.33183	0.834026	0.493543	1.04408	0.381938	0.514213	0.965137	0.695475	1.01558	0.315965	0.684099	0.414008	0.051057	0.213139	0.134197	0.228235	0.413107	0.421908	0.47544	0.00478661	-1.07895	down
gene-SLC31A1	3080	2267	4544	2538	5329	3337	2818	4788	4105	3259	1132	1635	1464	1424	1650	1399	1436	2103	1644	1714	22.6511	17.1885	34.5794	18.8711	35.3757	21.928	20.4065	33.6625	25.8335	21.7698	8.59057	10.9344	10.0812	9.80051	10.8512	9.6787	9.15695	14.6408	11.3299	12.3796	3.34607e-13	-1.11116	down
gene-ACOT2	279	485	398	188	475	371	413	499	501	444	1149	822	631	309	914	498	864	1326	821	453	4.08115	7.33011	6.04306	2.78278	6.28057	4.86356	5.96099	6.99442	6.28995	5.90814	17.4033	10.9691	8.65875	4.23675	11.9896	6.87165	10.9961	18.4133	11.2788	6.52535	2.08704e-05	1.04604	up
NewGene_12090	10	63	85	87	28	62	53	44	85	83	152	185	77	46	138	106	96	185	159	114	0.091785	0.600707	0.82187	0.814374	0.233189	0.511254	0.482727	0.390673	0.676879	0.70104	1.46115	1.57395	0.679766	0.396088	1.15424	0.965166	0.805809	1.67845	1.39149	1.04689	0.000910582	1.15945	up
gene-ZMYM3	155	175	131	178	151	161	211	187	101	227	252	516	431	380	380	267	444	371	380	296	0.758281	0.891176	0.66769	0.89178	0.66932	0.707926	1.02336	0.887621	0.425181	1.013	1.2815	2.32456	2.01145	1.75802	1.69896	1.23628	1.92298	1.75537	1.76333	1.43117	1.64255e-14	1.21531	up
gene-MNT	7093	1128	3188	770	2571	4527	1569	5633	5326	1647	276	579	574	3895	910	497	409	228	341	203	41.5208	6.78869	19.8771	4.48826	13.5601	24.2191	9.08752	31.5004	27.3417	8.98253	1.65098	3.12708	3.10704	21.2683	4.76131	2.66383	2.1111	1.24876	1.89734	1.1486	0.00133696	-1.98404	down
NewGene_2973	9	19	41	24	15	54	36	40	24	53	61	74	69	59	28	53	83	39	52	75	0.156666	0.362948	0.80235	0.456868	0.254872	0.898915	0.665952	0.714251	0.377699	0.901469	1.1839	1.26316	1.21395	1.0394	0.467326	0.946053	1.3634	0.697342	0.910849	1.39762	0.00239173	1.00673	up
gene-REV3L	4287	4665	5551	3152	3006	3928	4673	4627	3871	3580	894	2258	1219	1870	1311	1195	2903	1724	1610	992	11.4119	12.7874	15.2718	8.34909	7.14087	9.31458	12.2537	11.7688	8.8164	8.65811	2.3906	5.33435	2.97368	4.5327	3.10629	2.904	6.69583	4.34086	3.89865	2.53256	3.3404e-15	-1.32524	down
gene-NABP1	613	276	298	283	1194	467	384	294	635	345	264	110	294	301	121	151	182	114	248	77	6.82307	2.8007	3.19882	2.93762	10.5193	4.78666	3.74939	2.88316	5.88177	3.17353	3.39175	1.05162	2.84864	3.27436	1.3332	1.49075	1.9719	1.29042	2.35424	0.737446	0.00022893	-1.25166	down
gene-FAM181B	564	181	403	270	451	347	100	770	245	671	228	163	149	124	154	146	112	344	297	109	8.4027	2.77093	6.21108	4.05702	6.06709	4.61175	1.46381	10.9664	3.12187	9.08812	3.50508	2.21058	2.07585	1.72061	2.0466	2.04106	1.44747	4.85567	4.14866	1.59637	0.00393373	-1.03425	down
gene-MASP1	445	1119	680	491	775	773	790	397	970	799	861	1194	1158	774	1575	832	2198	2581	2553	1027	3.64495	10.1402	5.80284	4.01141	5.88054	5.73253	6.3453	3.19819	7.03151	5.92664	7.01731	8.5148	8.76032	5.79987	11.6865	6.13942	15.5296	19.8621	20.0901	8.27661	2.23112e-05	1.10008	up
gene-HS3ST5	106	56	53	42	131	130	81	67	99	62	400	267	178	205	316	63	174	254	126	235	1.27875	0.684924	0.498124	0.385267	1.06914	1.05198	0.717033	0.574019	1.01713	0.51063	4.98411	2.22509	2.00685	2.31235	3.41027	0.545827	1.38157	2.18036	1.41881	2.78116	8.19046e-07	1.53717	up
gene-LLGL2	85	72	78	80	174	105	122	132	83	84	180	285	185	136	197	166	234	221	222	213	0.645439	0.561866	0.612654	0.610284	1.18834	0.706623	0.935335	0.95436	0.538439	0.577954	1.44831	2.03439	1.31131	0.966381	1.36568	1.1817	1.60064	1.58815	1.58071	1.588	9.2416e-10	1.08946	up
gene-NFATC4	67	114	122	105	71	78	95	137	126	104	174	304	238	307	116	239	279	295	290	130	0.50893	0.881328	1.05693	0.799599	0.464015	0.504697	0.625549	0.958879	0.774934	0.687263	1.36834	2.07425	1.51867	2.17107	0.689198	1.68334	1.653	2.0602	1.90789	0.908072	2.76492e-11	1.29523	up
gene-PANK1	3318	8819	9587	2478	5214	4317	6327	5643	9271	2583	747	811	721	270	1349	435	628	979	976	542	24.3217	66.5953	73.009	18.4566	34.8188	28.5589	48.6949	43.343	58.3741	17.2596	6.11064	6.09203	4.98413	1.84455	9.30005	3.04852	4.02695	6.89356	6.7562	3.90706	4.85908e-24	-2.84083	down
gene-SPSB1	4748	4048	3330	1086	3347	2039	2726	2305	5541	1591	1108	1317	1121	1825	1378	1434	1618	1085	963	1285	42.8365	33.7406	31.3937	6.85501	24.5831	14.007	19.4776	19.3723	40.2057	9.44577	5.94787	8.05992	6.60797	11.8487	7.71732	8.00577	7.96091	6.15793	7.57871	7.47879	2.96072e-06	-1.13316	down
gene-PDE1C	58	158	82	226	142	126	120	159	139	139	339	356	228	348	304	335	418	349	266	248	0.263918	0.673147	0.329062	1.16635	0.517838	0.494365	0.509931	0.735331	0.597689	0.515404	1.5875	1.49655	0.800522	1.465	1.30072	1.50225	1.66308	1.58923	1.22015	1.09728	1.66058e-11	1.31721	up
gene-CXCL3	717	91	149	60	213	88	78	146	162	62	22	89	38	76	52	21	76	20	173	23	19.0203	2.49142	4.08777	1.5902	5.09625	2.06895	2.02092	3.68284	3.66033	1.48639	0.590334	2.14431	0.944644	1.88227	1.23271	0.523001	1.73167	0.491812	4.2946	0.576065	0.00350598	-1.56463	down
gene-HMOX2	6239	3217	2782	1671	3665	3323	2665	4096	3697	2359	1465	1348	1304	1824	1650	1552	1079	1232	1685	1209	97.5975	52.0325	45.1582	26.5165	51.9064	46.6024	41.1555	61.4294	49.6276	33.6326	23.63	19.2497	19.1639	26.7972	23.1631	22.9173	14.6917	18.2869	24.7772	18.6385	1.74524e-08	-1.13671	down
gene-IER3	10101	4088	2078	2100	4903	4026	1771	3076	3613	2158	1006	925	2195	3290	1772	2840	1085	1306	1746	1007	238.524	99.5023	50.7671	50.126	104.506	84.938	41.163	69.4336	73.0013	46.2902	24.5137	19.8571	48.5326	72.7232	37.4198	63.0839	22.212	29.1901	38.6318	23.3426	0.00332479	-1.06089	down
gene-NPTX1	403	89	102	65	224	68	74	88	202	125	38	58	9	23	19	22	44	19	19	32	5.49691	1.24245	1.42666	0.882934	2.75679	0.827376	0.991915	1.13716	2.34758	1.54667	0.52315	0.712858	0.110701	0.286853	0.221678	0.281509	0.518058	0.245166	0.2382	0.424326	4.75693e-09	-2.29105	down
gene-DLK1	45	8	134	44	12	35	154	6	9	31	892	89	63	74	439	133	45	85	141	71	0.912956	0.143504	2.70499	0.853054	0.225634	0.627903	2.92616	0.099914	0.123116	0.478545	18.8944	1.58181	1.17793	1.44178	8.09814	2.5214	0.790079	1.55767	2.67473	1.41323	0.00524759	2.23485	up
gene-LOC788801	762	1709	946	457	2104	865	700	549	1119	663	275	281	292	204	412	419	490	362	580	391	23.8537	55.1947	30.6571	14.4522	59.5232	24.2021	21.5953	16.4471	29.9858	18.8684	8.87674	7.98825	8.56417	5.98538	11.5317	12.3292	13.3086	10.7365	17.0155	12.0278	1.26271e-06	-1.32725	down
gene-CA4	111	96	131	225	155	119	215	135	73	227	566	457	686	439	466	1043	746	557	552	867	2.65382	1.96894	3.22316	5.3799	3.19284	2.62182	5.1267	3.11253	1.0841	4.98283	14.4646	9.12709	15.5748	9.31069	10.0239	23.6192	15.9838	13.2092	12.3946	21.2552	1.47086e-19	2.1868	up
gene-PCBP3	147	186	144	73	185	471	71	446	216	231	91	48	113	108	57	53	30	61	37	76	1.92632	2.41242	1.87593	0.893101	2.17492	5.31221	0.848162	5.53804	2.34354	2.66428	1.14109	0.528081	1.28525	1.2754	0.65744	0.609796	0.308412	0.69761	0.411933	0.914543	4.31222e-05	-1.54034	down
gene-METTL7B	124	297	87	117	347	189	174	279	188	173	144	90	66	54	71	122	55	47	54	40	2.03305	5.02563	1.47491	1.94118	5.13959	2.77765	2.81428	4.38602	2.6368	2.5756	2.43261	1.33683	1.00868	0.816786	1.03683	1.87515	0.77111	0.719169	0.81746	0.638704	3.81925e-05	-1.29214	down
NewGene_15121	60	84	50	53	62	70	89	43	51	49	132	112	59	137	117	202	124	71	62	165	0.867299	1.37376	0.797416	0.712516	0.939054	1.11189	1.58931	0.648039	0.561136	0.736111	2.01733	1.74357	0.746471	1.95902	1.62168	2.97885	1.60754	0.956316	0.891283	2.67313	0.000133625	1.04262	up
gene-CCRL2	43	130	215	174	58	108	143	124	87	184	363	153	124	82	67	406	558	287	319	373	0.8674	2.83505	4.76815	3.84916	1.1204	2.08178	2.92308	2.4904	1.50337	3.56163	8.07879	2.83357	2.55751	1.58032	1.28729	8.00873	10.4325	5.65628	6.41643	7.79846	0.00367204	1.1829	up
gene-CLDN1	18	91	55	35	59	45	81	92	100	71	11	31	56	2	10	16	36	17	34	41	0.400866	2.10243	1.27649	0.78396	1.18303	0.903227	1.79309	1.96422	1.91603	1.43964	0.248365	0.618924	1.16344	0.041783	0.20135	0.339024	0.697477	0.358556	0.717586	0.906462	0.00713116	-1.23548	down
gene-COL23A1	23	7	77	52	38	114	39	65	18	106	81	170	131	177	138	159	119	71	182	284	0.210531	0.066943	0.748947	0.496701	0.321152	0.962535	0.357162	0.582234	0.140962	0.904316	0.791646	1.46155	1.15994	1.56672	1.16931	1.4139	0.970494	0.630768	1.60809	2.63998	0.000140266	1.58607	up
gene-NECTIN1	128	47	99	54	79	87	113	173	138	92	34	38	38	111	44	57	48	27	24	13	2.04222	0.773674	1.63654	0.86486	1.14215	1.23701	1.78083	2.64567	1.89025	1.34219	0.554024	0.546741	0.570711	1.66077	0.618346	0.851524	0.657731	0.402111	0.35116	0.200664	0.00111883	-1.12248	down
gene-KRBA1	92	138	102	47	52	72	61	107	55	131	103	254	272	124	139	118	241	229	246	197	0.387721	0.598472	0.43996	0.194375	0.197658	0.267024	0.253831	0.432041	0.194618	0.502065	0.437934	0.956841	1.06011	0.487344	0.528984	0.463942	0.879342	0.913797	0.972724	0.79766	2.54274e-06	1.23736	up
gene-SLC38A4	27	12	64	50	89	67	74	50	47	63	412	471	414	366	167	138	498	341	461	268	0.179888	0.084572	0.451796	0.342465	0.545098	0.408447	0.498514	0.325536	0.268815	0.392361	2.91783	2.96313	3.41724	2.34556	1.02434	0.885355	2.99335	2.23523	2.9684	1.79998	8.47995e-23	2.78392	up
gene-FIGN	10	41	19	32	15	28	51	26	18	24	41	92	86	76	52	29	56	75	54	48	0.031582	0.140052	0.062749	0.106994	0.044511	0.08172	0.168287	0.080511	0.050319	0.07234	0.140539	0.278711	0.268199	0.238347	0.153321	0.088394	0.160975	0.23564	0.169295	0.157574	4.94339e-05	1.27919	up
gene-CANT1	2621	1404	2676	1449	1654	1974	2088	3686	1897	2041	798	812	695	1463	951	866	923	842	715	778	21.9686	12.1247	23.0761	12.2792	12.4532	14.6445	17.1901	29.4377	13.5678	15.4938	6.96259	6.23516	5.50163	11.4934	7.07785	6.89084	6.7621	6.6837	5.67438	6.25097	4.21794e-11	-1.18952	down
NewGene_9093	74	198	76	46	84	38	214	134	156	41	229	121	280	32	257	113	320	227	170	290	0.231566	0.640854	0.243957	0.144249	0.235942	0.104156	0.661105	0.399859	0.417167	0.115109	0.740812	0.345331	0.823031	0.092806	0.720575	0.331188	0.870736	0.674528	0.498754	0.891961	0.0137697	1.05777	up
NewGene_8057	13	34	26	41	41	32	28	31	30	29	45	88	83	51	70	77	44	51	64	40	0.334441	0.948637	0.716457	1.10375	0.991824	0.760556	0.739487	0.793559	0.685547	0.701486	1.2516	2.17878	2.10844	1.28994	1.69974	1.95955	1.03158	1.29917	1.63165	1.06743	7.77383e-06	1.09362	up
NewGene_11066	121	381	64	82	259	73	94	93	67	117	32	48	21	27	165	52	83	79	109	30	0.904072	2.89058	0.493209	0.643284	1.70972	0.488656	0.664351	0.635498	0.519745	0.774199	0.257388	0.322457	0.138078	0.172288	1.10856	0.356396	0.527186	0.535425	0.734365	0.225699	0.0356665	-1.01018	down
gene-FAM13C	101	88	176	181	130	195	310	200	226	180	412	530	367	290	215	323	558	558	284	343	0.775982	0.716414	1.41938	1.4413	0.916972	1.41353	2.52627	1.54199	1.51994	1.35698	3.52889	3.8452	2.85892	2.26131	1.51754	2.44767	3.92264	4.30674	2.16813	2.81212	5.54548e-08	1.20263	up
gene-LRRC14B	344	329	417	576	165	589	530	500	419	774	661	956	1039	1608	1002	980	1123	976	1051	1245	3.40976	3.36511	4.28109	5.77406	1.47236	5.2173	5.17876	4.74278	3.55663	6.9763	6.76863	8.63223	9.66065	14.9421	8.89675	9.15495	9.67155	9.16888	9.77945	12.1435	6.46808e-09	1.28281	up
gene-LOC100335553	125	356	882	536	605	252	632	565	488	503	191	276	187	204	162	166	213	406	294	180	0.845482	2.71294	6.94936	4.03915	3.94874	1.59363	4.35824	4.0628	3.19375	3.36557	1.58964	1.80561	1.20043	1.38254	0.95421	1.20718	1.36477	2.99025	2.22241	1.41682	0.000257975	-1.03515	down
gene-KLHL6	823	316	393	235	423	527	334	791	598	426	157	193	169	147	360	206	212	256	253	301	3.94307	1.55943	1.94944	1.13579	1.82871	2.25449	1.57574	3.6258	2.45351	1.85182	0.773659	0.838014	0.758279	0.659298	1.54363	0.926822	0.881544	1.15988	1.13458	1.41477	5.20211e-05	-1.00782	down
gene-ZNF729	64	103	145	108	347	123	138	162	177	100	26	46	49	60	62	50	54	37	78	60	0.625557	1.05192	1.48987	1.08898	3.13785	1.07858	1.34076	1.53572	1.50117	0.896175	0.262985	0.406959	0.452346	0.550627	0.545342	0.464464	0.459312	0.337022	0.714426	0.577325	4.80404e-07	-1.39115	down
NewGene_8908	23	144	27	30	48	12	59	57	129	21	121	890	20	184	97	262	79	126	83	21	0.316089	2.32288	0.397511	0.557199	0.700974	0.13317	0.803321	0.798973	1.6094	0.35788	1.83037	13.4129	0.374528	2.52873	1.19296	3.41002	0.966602	1.99421	1.12398	0.33929	0.00821098	1.81771	up
NewGene_5774	99	87	79	56	95	153	78	149	156	55	39	50	35	96	34	51	48	24	9	20	2.30657	2.10124	1.91545	1.31191	2.01133	3.19508	1.78024	3.32888	3.11997	1.15716	0.922128	1.05296	0.768344	2.10065	0.699153	1.10926	0.959162	0.514542	0.192572	0.450694	0.00045377	-1.21375	down
gene-TSSK3	136	75	46	35	75	60	36	106	75	56	17	19	12	19	22	39	22	25	16	14	2.37637	1.3476	0.811692	0.603825	1.16958	0.918025	0.614033	1.74305	1.10265	0.874459	0.29604	0.323722	0.205901	0.293572	0.327962	0.628473	0.334147	0.411014	0.252498	0.233902	4.30584e-08	-1.68857	down
gene-GLCE	375	1820	1083	529	1662	808	1113	1047	1471	641	417	463	323	272	409	432	495	405	408	361	1.98185	9.89981	5.86509	3.14051	7.85226	3.783	5.73781	5.24371	6.58561	3.10168	2.69151	2.23633	1.58082	1.33627	2.23809	2.12305	2.24755	2.02355	2.05305	1.91197	3.31204e-08	-1.30578	down
gene-ESF1	670	419	495	422	637	572	534	618	515	404	137	438	128	220	135	85	411	377	177	110	5.55128	3.68045	4.26895	3.64716	4.77045	4.37051	4.3508	4.89177	3.75407	3.03616	1.17039	3.29603	0.992894	1.70118	1.02707	0.656126	3.04799	2.95243	1.374	0.911078	4.81182e-06	-1.22141	down
gene-CXCL14	63	767	736	238	412	318	612	272	323	207	67	142	293	70	122	200	354	150	105	223	1.05358	13.3197	12.8187	4.04886	6.25307	4.77616	10.1366	4.37237	4.65212	3.15997	1.15657	2.16482	4.61086	1.09617	1.82398	3.15946	5.17149	2.38798	1.64889	3.67595	0.0069845	-1.12173	down
gene-CXCL10	0	45	50	28	8	88	40	31	160	38	283	130	20	135	79	70	125	127	67	38	0	1.07117	1.19105	0.660299	0.165575	1.8295	0.910535	0.676392	3.20429	0.805488	6.8402	2.75926	0.419939	2.94378	1.64946	1.5372	2.53098	2.81411	1.45809	0.855762	0.04057	1.29157	up
gene-GLT8D2	8	223	105	45	129	108	136	117	138	54	204	357	185	243	255	247	342	148	131	170	0.148164	4.37122	2.05526	0.856747	2.208	1.82445	2.54756	2.12689	2.24979	0.919969	3.99645	6.17461	3.28529	4.32617	4.33671	4.42614	5.64958	2.65421	2.33524	3.18379	0.00147888	1.18636	up
gene-SEMA3G	448	816	842	561	354	538	656	660	767	697	1485	1711	783	618	764	1974	1842	1974	1345	1675	2.56158	4.80918	4.98222	3.24302	1.82791	2.74789	3.69367	3.60698	3.75329	3.62087	8.79539	8.91085	4.19031	3.30875	3.91091	10.6637	9.142	10.7001	7.21414	9.41776	4.90446e-08	1.24524	up
gene-ADGRL1	100	75	124	187	54	202	67	234	161	127	142	284	569	556	105	192	324	128	169	111	0.363946	0.30994	0.487555	0.696608	0.175189	0.659387	0.239563	0.962147	0.516384	0.588883	0.606924	1.1529	2.02108	1.95279	0.392255	0.960713	1.34111	0.531125	0.61003	0.55291	0.00868234	1.04104	up
NewGene_10889	125	68	72	64	54	99	90	49	100	91	23	18	33	54	20	36	98	43	22	25	1.48113	0.83088	0.875369	0.761066	0.570156	1.05326	1.05481	0.556023	1.01283	0.981458	0.280833	0.191579	0.362656	0.593654	0.205826	0.39608	1.01136	0.517913	0.239661	0.359902	0.000770421	-1.07543	down
gene-FAM222A	400	37	250	459	51	438	144	196	417	188	96	57	33	66	24	4	67	8	7	38	3.64721	0.295836	2.38767	4.48673	0.422752	3.59649	1.35139	1.76296	3.25672	1.63385	0.90538	0.474499	0.238582	0.540151	0.165296	0.029794	0.536878	0.06012	0.045906	0.358408	2.03111e-05	-2.60517	down
NewGene_10262	1302	438	1072	380	506	1315	661	842	705	400	450	456	412	774	322	116	505	40	53	109	4.33894	1.48032	3.39807	1.05125	1.45352	3.57336	2.10873	2.5335	1.88392	1.37102	1.57072	1.23923	1.57792	2.30693	0.957206	0.330444	1.44247	0.116341	0.151475	0.286269	0.0369247	-1.16439	down
gene-PLEKHF1	333	271	298	201	213	296	402	631	319	405	449	721	606	469	796	594	643	790	608	730	5.29737	4.43148	4.89394	3.21528	2.95795	4.20515	6.27539	9.50051	4.33792	5.62076	7.33226	9.99741	8.7025	6.54372	10.7736	8.82041	8.8594	11.7854	8.67536	10.8	3.09819e-08	1.02539	up
NewGene_3080	294	255	163	219	180	215	173	202	218	137	69	85	81	91	55	32	128	71	94	57	2.64071	2.36905	1.51432	1.98773	1.46382	1.73114	1.53447	1.73513	1.67643	1.11624	0.634652	0.691799	0.678624	0.764504	0.44304	0.267004	0.994054	0.598536	0.79331	0.500665	4.21225e-11	-1.37019	down
NewGene_4614	1105	5491	888	131	3149	300	2063	681	1409	345	0	25	2	0	159	78	91	104	377	9	6.14381	33.4955	6.57747	1.27338	16.1668	1.51156	12.1273	4.18481	6.79773	2.13676	0	0.12926	0.006929	0	0.932875	0.50505	0.68687	0.607964	2.44491	0.035661	6.31161e-05	-4.15186	down
NewGene_6755	433	388	475	260	449	348	700	924	686	555	198	228	175	389	170	240	164	313	103	360	8.47832	7.81639	9.60763	5.13894	7.93793	6.08999	13.4947	17.2942	11.4919	9.87274	3.99371	4.0527	3.19805	7.11967	2.96334	4.40702	2.77869	5.80326	1.8791	6.91944	9.86506e-05	-1.03519	down
gene-PELI2	131	159	317	329	176	216	227	307	231	260	479	721	359	618	543	610	588	309	345	311	0.620932	0.789373	1.58268	1.60509	0.749364	0.932926	1.05682	1.41838	0.955484	1.14128	2.38912	3.16932	1.62111	2.79604	2.34655	2.77239	2.46351	1.41037	1.56262	1.47527	6.12934e-08	1.12678	up
gene-KCNMB4	1162	614	664	666	510	548	802	627	581	635	279	375	155	134	136	226	329	124	283	187	8.50745	4.63955	5.11825	5.01641	3.44601	3.70353	5.88568	4.43919	3.71884	4.27415	2.10493	2.46774	1.08242	0.958113	0.966494	1.54516	2.09747	0.768331	1.92488	1.36147	3.85683e-12	-1.55586	down
gene-RGS6	70	44	28	82	21	36	39	28	74	31	112	166	99	157	105	88	167	109	95	82	0.300251	0.198297	0.145665	0.346224	0.078015	0.149967	0.163867	0.129631	0.323868	0.120008	0.550752	0.732813	0.417445	0.807299	0.430409	0.42047	0.757075	0.444902	0.416195	0.416443	1.01769e-07	1.43912	up
gene-CTH	128	334	384	148	262	148	235	170	167	206	52	147	29	32	58	71	87	105	174	91	1.75327	4.90379	5.6606	2.18214	3.32305	1.86917	3.26365	2.3487	1.8948	2.67996	0.772051	1.90949	0.390255	0.433446	0.716833	0.966219	1.09339	1.42045	2.28868	1.24683	6.08948e-05	-1.30875	down
gene-HLX	191	236	371	358	183	242	242	266	220	288	760	496	307	196	404	523	448	652	566	612	2.30811	2.93743	4.63969	4.37319	1.9941	2.61054	2.8798	3.07447	2.27517	3.16349	9.49297	5.45691	3.47696	2.21541	4.37448	5.95771	4.70368	7.47411	6.41918	7.27533	2.55163e-05	1.02829	up
gene-LOC100850659	8	0	8	75	16	12	56	8	22	29	189	245	81	76	121	107	146	109	140	111	0.047452	0	0.048122	0.44797	0.085318	0.061318	0.325423	0.043131	0.109351	0.154876	1.1567	1.32227	0.449958	0.420298	0.639451	0.594197	0.749712	0.610862	0.774686	0.642885	6.23635e-07	2.5524	up
gene-UCP3	26961	198	15838	23831	3100	24913	16946	22785	17827	17346	15097	7465	4784	4672	2916	5765	10872	4847	449	4187	352.406	2.61616	213.504	311.958	36.448	291.621	218.111	285.666	200.087	206.823	205.334	92.6631	59.8251	57.6069	34.4507	71.8222	125.577	62.4914	5.79956	53.5783	0.0473241	-1.38844	down
gene-HSPH1	8172	6828	2061	3181	5937	5100	4026	5190	6811	3896	1775	2081	1686	2996	2642	1833	1927	2196	3801	1583	63.2416	54.4796	16.4326	24.852	41.3716	35.1897	30.5952	38.4147	44.9837	27.4046	14.1416	14.6061	12.2022	21.6513	18.2114	13.2873	12.895	16.0241	27.5278	12.001	2.39771e-06	-1.09829	down
gene-RBM38	23770	6265	13964	9740	9728	14478	9479	18030	12142	13842	3875	3955	4880	16650	6231	6329	4821	3239	3604	3393	308.633	82.9958	188.322	127.316	113.724	168.198	121.244	223.751	134.296	162.856	51.104	45.9376	58.3826	202.817	71.5734	76.1413	53.3872	39.2536	43.1124	42.5224	0.000401999	-1.12143	down
gene-EMP1	22508	17897	15649	11440	37006	15788	12358	24339	23883	11211	3379	7916	6340	14918	10480	6590	6318	4719	5033	3413	223.192	182.96	160.57	114.686	331.702	139.874	120.666	230.72	202.956	100.982	34.5785	71.4078	58.8694	138.507	92.9629	61.4866	54.3787	44.3112	46.7669	33.251	4.6243e-07	-1.39002	down
gene-CSMD2	52	30	60	82	19	105	67	60	90	37	77	202	148	107	165	113	147	85	208	134	0.10658	0.062334	0.128204	0.170587	0.034118	0.193763	0.135542	0.118676	0.159266	0.068787	0.163963	0.381666	0.287134	0.206369	0.306603	0.220771	0.264226	0.166345	0.403543	0.272721	9.95684e-06	1.28275	up
gene-STC1	468	776	307	131	976	210	114	682	368	211	91	184	203	435	387	155	132	119	107	86	5.21791	8.93048	3.53663	1.4776	9.82882	2.08656	1.2486	7.27875	3.50813	2.13347	1.04126	1.86541	2.11188	4.53856	3.86469	1.6193	1.27205	1.25578	1.11745	0.93396	0.0183612	-1.06802	down
gene-GPX3	11133	16869	6939	5957	15436	10832	10128	8463	19826	7233	2508	4127	3947	4472	5885	4746	3733	2899	4634	2868	193.41	302.137	124.743	104.621	242.087	168.133	173.265	140.559	294.737	114.139	44.986	65.2273	64.2011	72.7328	91.4588	77.5754	56.2542	47.6899	75.4371	48.9561	6.41901e-11	-1.40184	down
gene-PI15	520	365	608	299	738	60	682	302	160	218	115	274	140	28	155	53	186	70	120	123	2.04553	1.48058	2.76125	1.18845	2.63066	0.21067	3.04357	1.13783	0.53764	0.776988	0.464055	0.979174	0.51536	0.100366	0.543251	0.194683	0.63233	0.260049	0.440023	0.474023	0.000163245	-1.60076	down
gene-LRRC3B	70	99	100	159	73	123	89	114	96	153	220	142	181	145	213	269	204	217	229	284	1.23957	1.94888	2.02143	3.04308	1.15433	2.14362	1.71368	2.10207	1.59196	2.64383	4.43363	2.4651	3.23988	2.57638	3.70141	4.89055	3.39788	4.00713	4.18855	5.3824	5.70876e-07	1.0653	up
gene-ESRRG	1707	4532	3631	2416	5140	2116	4456	5501	2713	3992	628	239	193	94	345	274	285	1014	965	694	9.09699	25.0455	20.0276	13.4174	24.8932	10.1713	23.4115	28.2367	12.3728	19.4126	3.4153	1.13161	0.941513	0.460817	1.61647	1.35663	1.29528	5.08026	4.78933	3.67166	6.23085e-13	-2.81908	down
gene-EYA1	126	55	133	286	84	374	171	131	270	317	287	524	489	748	327	321	517	219	327	390	0.862415	0.353728	0.862308	2.00654	0.482601	2.13429	1.1053	0.850543	1.59072	1.98878	2.05495	3.31241	3.17026	4.79704	2.03461	1.9985	3.08305	1.3106	2.09691	2.66753	0.000368351	1.1743	up
gene-STEAP4	70	36	53	60	10	42	32	14	30	38	307	340	400	80	118	198	286	332	320	223	0.421052	0.220651	0.328344	0.366395	0.050013	0.22478	0.189109	0.07952	0.154033	0.204501	1.92345	1.87578	2.27278	0.453245	0.638605	1.12787	1.50227	1.90514	1.81857	1.33088	2.14672e-16	2.81754	up
gene-TYRP1	29	16	20	50	19	12	44	27	25	28	60	146	86	44	138	61	48	98	72	58	0.39337	0.22165	0.3115	0.68328	0.229386	0.142277	0.666404	0.350844	0.293664	0.379282	0.954313	2.04479	1.23608	0.554543	1.89499	0.883471	0.642669	1.4218	0.915312	0.777083	2.80399e-07	1.6555	up
gene-CIB2	233	35	163	483	24	418	188	258	279	382	53	48	52	318	25	61	95	26	47	103	4.73873	0.737308	3.40636	9.79881	0.379893	7.47658	3.83341	5.00641	4.76322	6.99877	1.10217	0.835243	0.973469	5.95966	0.428988	1.14924	1.62539	0.423595	0.883181	2.0324	0.0163499	-1.4951	down
NewGene_272	11	45	34	19	36	29	38	27	45	49	77	134	33	16	71	46	81	205	67	13	0.092282	0.401165	0.300601	0.165794	0.283184	0.220696	0.322739	0.21952	0.334116	0.389008	0.687308	1.06514	0.266639	0.126362	0.55348	0.376274	0.607383	1.69398	0.546785	0.104938	0.00682982	1.22852	up
gene-SBK1	48	214	129	39	90	53	44	245	173	67	279	295	189	225	192	216	162	320	358	379	0.27414	1.26598	0.765795	0.222734	0.46043	0.272355	0.242704	1.33887	0.852739	0.34353	1.63438	1.52476	1.00694	1.19849	0.98064	1.17173	0.805995	1.72229	1.91151	2.12204	9.66133e-05	1.3754	up
gene-GALNT15	242	954	541	259	810	896	1513	1274	637	413	88	460	312	219	495	628	305	148	138	138	1.66997	6.80432	3.86994	1.8092	5.05921	5.53801	10.3079	8.42255	3.76744	2.59569	0.627572	2.89442	2.02171	1.41823	3.06043	4.08767	1.82623	0.964985	0.891015	0.935839	0.00135919	-1.27332	down
gene-TRIL	12	145	177	174	60	100	243	209	230	148	440	287	161	220	185	382	431	292	198	446	0.046018	0.571225	0.702025	0.67418	0.204967	0.342599	0.914247	0.762901	0.752691	0.513468	1.73914	0.999164	0.57517	0.788582	0.632674	1.37578	1.43144	1.05968	0.710988	1.67954	0.00303622	1.13559	up
gene-GBA	2072	676	905	452	1542	900	747	1640	1239	538	324	436	247	1054	357	438	517	458	440	291	24.8563	8.36171	11.4203	5.56993	16.7029	9.64467	8.82479	18.8491	12.7211	5.86178	4.01485	4.75076	2.81455	11.9842	3.83092	4.93634	5.41232	5.21389	4.93854	3.42011	0.000146022	-1.15508	down
gene-CSRNP3	19	44	29	22	58	34	194	30	43	86	200	321	104	29	323	124	362	463	532	225	0.041557	0.100761	0.066629	0.049571	0.116978	0.067236	0.425758	0.063122	0.082138	0.173187	0.461701	0.653072	0.217493	0.060497	0.645897	0.259947	0.699194	1.00737	1.11419	0.492972	5.17949e-07	2.33811	up
gene-RASL11A	85	167	94	157	125	92	112	86	128	80	203	483	157	220	377	157	260	230	364	260	2.22951	4.52936	2.54189	4.17343	2.95547	2.1502	2.89808	2.14806	2.8642	1.89844	5.50968	11.5534	3.86304	5.4116	8.858	3.8622	5.92997	5.72996	8.95102	6.70636	4.56197e-09	1.33011	up
gene-OLFML3	165	639	407	336	260	303	244	280	356	312	588	873	732	545	566	647	741	501	593	704	2.57807	10.3269	6.59286	5.31934	3.66845	4.23586	3.76611	4.18657	4.76591	4.43497	9.51329	12.4442	10.7445	8.00064	7.92888	9.54176	10.0765	7.43496	8.71247	10.8405	1.30687e-07	1.05708	up
NewGene_12956	254	35	94	76	125	243	126	147	332	158	49	60	46	160	54	84	87	49	55	62	3.51795	0.371769	1.71242	1.2235	1.04356	2.23059	1.62869	2.36346	2.19145	1.87806	0.933568	0.488182	0.547848	2.53207	1.08298	0.506405	0.96803	0.810204	0.308733	0.414523	0.0033006	-1.06827	down
NewGene_12957	150	21	17	62	86	149	78	105	229	114	22	28	15	69	31	42	21	22	16	8	0.783601	0.108694	0.090649	0.326867	0.406349	0.692843	0.398172	0.524274	1.02227	0.538743	0.117493	0.131104	0.07101	0.334789	0.140862	0.205496	0.094282	0.10528	0.074599	0.040339	9.07604e-05	-1.77223	down
gene-SAA3	138	446	669	313	924	351	540	352	83	32	13	86	43	51	19	39	86	27	36	8	6.94873	23.2547	35.0905	16.0025	42.2496	15.8639	26.9424	17.0418	3.56169	1.46361	0.653146	3.96437	2.01148	2.39995	0.822571	1.84025	3.75857	1.2634	1.66363	0.384832	1.78e-09	-3.22588	down
gene-CD9	6604	5022	4207	3567	5839	3931	3712	6328	6597	3548	2118	2589	1684	2672	2212	2721	2944	2456	1635	1495	152.419	119.491	100.475	83.2331	121.658	81.0562	84.3533	139.619	130.286	74.3776	50.4719	54.3569	36.3892	57.7441	45.6681	59.0838	58.9356	53.6785	35.3505	33.9042	1.66507e-11	-1.05029	down
gene-RETREG1	49327	39003	38396	21920	73844	38059	36774	58945	47161	43377	6252	9351	16432	27683	23575	14773	9680	13269	22744	11626	451.899	362.302	329.652	198.825	595.632	291.281	329.075	501.206	371.291	357.146	55.3919	70.3708	134.945	218.148	184.876	123.65	67.237	108.906	176.063	97.5068	3.90226e-08	-1.42052	down
gene-HDAC9	162	79	96	82	101	90	115	108	188	63	336	315	194	138	261	184	202	140	234	99	0.81895	0.405935	0.493123	0.416023	0.45531	0.400174	0.556044	0.521979	0.805542	0.280717	1.74756	1.44174	0.912228	0.646551	1.17756	0.858841	0.875319	0.666332	1.10644	0.481751	4.18306e-05	1.05537	up
gene-ITGA3	347	243	365	405	155	308	269	421	418	281	649	779	635	334	376	824	996	994	714	621	1.95935	1.28751	2.07172	2.10489	0.717526	1.55102	1.48979	2.27404	1.83736	1.31162	3.68874	4.00422	3.05694	1.76766	1.89708	4.3855	4.88345	5.32068	3.7759	3.44436	3.69481e-08	1.18344	up
gene-NR4A2	243	186	152	266	332	273	354	237	112	240	303	1733	3339	1033	2428	750	318	266	687	165	2.44527	1.76686	1.43332	2.47632	2.84621	2.2496	3.03456	2.10816	0.921163	1.98701	2.83728	14.372	28.4536	8.86623	20.2946	6.55624	2.59253	2.33649	5.92137	1.44147	1.81044e-05	2.292	up
gene-SYNJ2	6635	2389	3277	1619	2972	3181	2376	4761	3339	2107	273	264	258	2596	567	397	397	534	399	203	26.5194	9.79552	12.8583	6.35598	10.7855	10.5742	8.86141	18.1287	11.5553	7.20115	1.03648	0.903708	0.910803	8.91193	1.82102	1.36851	1.26183	1.89818	1.46701	0.711617	3.2808e-07	-2.39461	down
gene-WISP2	186	268	133	116	211	114	129	127	178	129	65	667	364	270	293	322	580	323	349	230	2.71646	3.44512	1.98894	1.79478	2.26975	1.2692	1.70726	1.57218	2.48745	1.45813	0.886357	7.21485	4.17296	3.40402	4.00947	4.50642	6.00239	4.17487	4.37119	2.86004	5.39657e-05	1.16004	up
gene-ZNF750	96	28	166	230	193	242	55	552	284	264	769	1407	771	327	898	514	908	536	809	696	0.855688	0.253354	1.53502	2.07404	1.55457	1.92495	0.48142	4.70988	2.16469	2.13895	7.09215	11.4368	6.4506	2.7338	7.17772	4.31445	7.03521	4.52756	6.76712	6.10646	1.48672e-07	1.95791	up
gene-MMP17	20	33	23	54	4	35	25	70	91	47	56	81	72	57	102	105	104	49	82	131	0.122881	0.204811	0.139551	0.332644	0.0211	0.189031	0.152059	0.410875	0.477052	0.25618	0.35309	0.452101	0.412839	0.328381	0.560373	0.608429	0.553009	0.283712	0.470802	0.794193	0.00237834	1.1809	up
gene-KCNC4	801	574	667	1618	1320	1156	1897	966	2224	1400	240	533	689	466	425	741	259	499	659	421	3.43359	2.65372	3.5526	8.31966	5.12893	5.46025	8.85524	4.35268	8.2617	5.85855	1.41706	2.6844	3.70356	2.22751	2.286	3.93337	1.14714	2.45014	2.93983	1.99126	3.74476e-06	-1.24593	down
gene-TGM3	179	57	163	65	76	17	55	122	65	91	64	10	16	21	24	32	33	22	27	31	1.87055	0.607461	1.77105	0.672775	0.701785	0.15622	0.567622	1.20004	0.570547	0.850434	0.679506	0.093915	0.152216	0.201466	0.220531	0.306744	0.286086	0.212652	0.251054	0.308984	0.000209886	-1.56425	down
gene-SDC4	8198	6808	6352	4207	13803	10043	4549	10846	10072	4112	4321	2835	4469	6164	3682	3557	2315	1533	5647	1329	89.4636	76.5953	71.7184	46.4015	135.983	97.9142	48.8725	113.132	94.0466	40.7589	48.6747	28.1461	45.662	62.9843	35.9467	36.5209	21.9167	15.843	57.742	14.2456	0.00103738	-1.024	down
gene-EFR3B	231	161	272	131	168	80	99	358	151	114	48	54	38	37	40	52	68	58	66	36	0.961175	0.691911	1.17146	0.549365	0.631469	0.297201	0.404367	1.42495	0.53751	0.429934	0.205869	0.202249	0.146674	0.141448	0.148184	0.201674	0.242847	0.225467	0.254477	0.146466	3.1969e-11	-1.75252	down
gene-SOCS3	3247	814	329	354	2322	376	609	244	1244	470	309	486	295	878	280	304	259	181	637	174	33.8874	8.77555	3.72945	3.78861	21.902	3.62465	6.26555	2.46438	11.2991	4.47509	3.35251	4.64477	3.05818	8.77375	2.63541	2.99769	2.37479	1.80956	6.26504	1.85022	0.019568	-1.33676	down
gene-RASD1	1093	1164	826	715	728	867	993	703	1184	757	208	743	358	347	563	647	317	280	315	481	20.0769	22.0403	15.7019	13.2675	12.0745	14.2276	17.9563	12.3409	18.6164	12.6363	3.93993	12.4212	6.1552	5.9611	9.25566	11.1759	5.04138	4.85586	5.41641	8.68517	5.4098e-06	-1.00319	down
gene-MUM1L1	16	25	41	57	37	61	67	42	57	53	119	107	105	109	83	57	136	89	51	72	0.086924	0.141576	0.230238	0.314371	0.18313	0.297784	0.357755	0.218932	0.267678	0.263333	0.673883	0.532917	0.538985	0.561017	0.403651	0.291697	0.669738	0.461435	0.261044	0.384108	2.43525e-05	1.11547	up
gene-MYOD1	162	49	143	535	31	297	182	209	308	284	1355	1018	943	679	619	936	1480	838	644	1346	2.38971	0.7381	2.18529	7.98569	0.404397	3.91299	2.64462	2.94672	3.8926	3.81019	20.6813	13.6806	13.044	9.3993	8.18	13.0092	18.9697	11.7187	8.91928	19.5484	1.26078e-09	2.2466	up
NewGene_754	24	148	68	84	132	64	72	34	85	42	89	206	174	204	114	185	350	252	155	142	0.175483	1.13507	0.524348	0.633994	0.885428	0.421877	0.52853	0.241582	0.539632	0.282176	0.683765	1.39956	1.21342	1.42291	0.762498	1.29493	2.26624	1.78015	1.08512	1.04093	1.46829e-05	1.36416	up
gene-TGIF1	654	881	466	371	1134	427	517	537	728	275	338	220	284	327	299	268	291	136	262	226	10.742	15.3362	8.22486	6.18352	17.2005	6.45251	8.35539	8.65414	10.1674	4.17493	5.72409	3.30578	4.3404	5.18607	4.56584	4.26299	4.18731	2.08786	4.10907	3.59815	1.89735e-05	-1.07456	down
gene-FCGR3A	49	74	42	27	76	58	140	91	69	64	108	294	88	152	205	176	166	147	100	68	0.68781	1.04104	0.592438	0.360541	0.969143	0.729708	1.93359	1.21212	0.808331	0.827647	1.59969	3.86547	1.16563	1.99019	2.54994	2.33875	2.01333	1.95881	1.29799	0.935414	3.39156e-05	1.19775	up
gene-TLR5	21	18	27	30	10	9	45	50	21	29	56	49	89	45	49	45	84	57	16	61	0.220494	0.197724	0.289941	0.321454	0.089728	0.083003	0.470189	0.50936	0.190751	0.276895	0.613968	0.476016	0.888632	0.451018	0.469113	0.449415	0.775542	0.576173	0.159669	0.632629	0.00142887	1.17759	up
gene-TNFSF10	62	118	213	526	38	185	301	122	151	521	485	471	271	149	155	394	835	738	462	549	1.44228	2.79393	4.91246	11.9083	0.706283	4.18276	6.68839	2.8696	3.19115	10.7486	11.0859	10.3274	6.19269	3.53367	3.42209	8.85381	16.0913	15.7567	9.83277	12.4653	0.0483462	1.06005	up
gene-FKBP5	10005	11268	15960	10711	13928	12011	13513	15195	15457	8409	2607	4399	3929	4465	3005	2510	3495	2310	1742	2096	71.7496	83.0515	118.519	77.4655	89.8934	75.9139	95.2084	103.958	93.4445	54.6036	19.3902	28.6841	26.2314	30.2423	19.4772	16.9268	21.788	15.7373	11.7273	14.8884	8.33108e-33	-1.96371	down
gene-CBX8	8	40	13	44	22	23	19	32	22	43	50	67	51	16	28	40	81	81	71	57	0.138479	0.796653	0.255027	0.874703	0.387025	0.402098	0.350432	0.603267	0.361447	0.765144	1.01551	1.19244	0.937043	0.28826	0.484705	0.7372	1.37549	1.50403	1.30749	1.09615	0.0031149	1.09505	up
gene-GFPT2	1839	2924	994	581	3920	1307	1669	1095	1857	549	498	437	566	1027	441	772	676	312	335	372	17.4871	28.667	9.7803	5.58074	33.6506	11.1036	15.6234	9.95409	15.108	4.73657	4.88108	3.78001	5.0351	9.14381	3.75057	6.90503	5.57446	2.80536	2.98544	3.46839	6.15234e-06	-1.53302	down
gene-XRCC3	101	357	200	126	173	195	167	179	233	147	58	85	74	82	60	84	102	136	109	69	1.07891	3.53641	2.37954	0.954414	1.42283	1.90121	1.71442	1.3126	1.89708	1.1664	0.819609	0.779991	0.498933	1.03761	0.529125	0.604059	1.01218	0.979298	0.965489	0.571828	2.20183e-06	-1.04641	down
NewGene_6165	29	16	46	243	178	28	119	105	124	198	136	210	307	192	248	122	277	168	199	214	0.129009	0.071374	0.214045	1.11221	0.729935	0.111628	0.53055	0.455463	0.478461	0.817009	0.637048	0.868108	1.30315	0.815771	1.00562	0.519677	1.08956	0.721943	0.846286	0.953521	0.024709	1.01405	up
gene-CNTNAP1	16	22	24	60	6	11	26	30	19	24	45	99	77	35	46	45	74	87	62	40	0.080356	0.109963	0.124698	0.306564	0.024644	0.049478	0.127327	0.142019	0.080371	0.107418	0.255601	0.454011	0.361408	0.162161	0.207675	0.214527	0.322771	0.416415	0.297734	0.195148	9.53578e-05	1.40529	up
gene-NPC1	1024	1334	1154	882	1303	1576	999	1952	1571	1082	551	476	515	851	535	642	478	344	454	382	6.56557	8.82169	7.65593	5.71603	7.54351	9.02845	6.30561	11.966	8.62259	6.30081	3.64865	2.77365	3.09089	5.10646	3.06941	3.87426	2.65972	2.08492	2.72946	2.40517	5.51081e-12	-1.19253	down
gene-SLC25A5	943	538	652	375	913	522	450	678	731	370	268	224	196	301	230	190	195	177	212	189	22.7546	13.3864	16.2919	9.15417	19.9032	11.2507	10.6974	15.6528	15.0986	8.10637	6.67003	4.90377	4.42047	6.80227	4.94974	4.30878	4.084	4.02538	4.77911	4.48327	6.15562e-13	-1.40383	down
gene-CDK18	201	42	257	197	63	308	196	193	302	319	420	390	747	387	337	538	364	622	181	513	1.82305	0.382043	2.40873	1.79966	0.506508	2.5031	1.7752	1.68383	2.33922	2.63148	3.97181	3.3088	6.3932	3.34374	2.7937	4.6551	2.8947	5.39588	1.53347	4.56233	0.000298778	1.23285	up
gene-FBXO32-2	5707	1954	2946	2348	3896	3892	3077	6595	4258	4886	888	1400	1207	4201	2877	2136	1918	1114	1014	918	102.359	36.1168	54.6638	42.5676	63.0804	62.3588	54.343	113.079	65.3424	79.6078	16.4391	22.8335	20.2581	70.5462	46.1483	36.0453	29.8292	18.9201	17.0429	16.1645	0.000469069	-1.07459	down
gene-EHF	125	89	58	86	117	98	47	116	112	145	45	33	29	38	28	65	44	28	38	47	0.672283	0.495454	0.323215	0.468692	0.726473	0.471354	0.249278	0.596047	0.516534	0.786592	0.246849	0.160849	0.144958	0.190796	0.132693	0.327023	0.204744	0.143511	0.192667	0.307633	5.98423e-07	-1.23179	down
gene-ECT2	242	96	169	59	156	154	158	220	196	110	64	128	58	93	49	31	50	90	81	52	1.63113	0.662404	1.18026	0.395922	0.953358	0.923238	1.04462	1.42203	1.13215	0.673716	0.443249	0.786445	0.364298	0.588983	0.290378	0.197247	0.289244	0.577998	0.51266	0.342754	0.000109955	-1.08069	down
NewGene_203	39	39	98	14	66	29	94	107	129	75	30	0	21	28	16	34	28	51	8	40	2.13359	2.17336	5.5515	0.758958	3.23902	1.42616	5.06853	5.62431	6.08089	3.70763	1.65227	0	1.05732	1.43025	0.74638	1.71986	1.31638	2.6294	0.404052	2.14337	0.0163563	-1.28039	down
gene-GTSE1	248	2716	536	171	2181	327	324	518	745	383	139	431	103	49	387	364	258	334	690	299	2.39529	27.1765	5.3668	1.66856	19.1134	2.825	3.08526	4.78755	6.17052	3.37377	1.38152	3.79458	0.930415	0.435676	3.34669	3.31367	2.16016	3.05621	6.27171	2.84047	0.0337251	-1.3439	down
gene-F2RL2	472	821	693	243	832	295	416	405	860	255	545	151	181	366	248	246	191	156	219	110	4.55835	8.17215	6.92027	2.36789	7.25668	2.54424	3.95838	3.73279	7.10382	2.23806	5.4362	1.32342	1.63458	3.30902	2.13539	2.23313	1.59857	1.42757	1.97529	1.03787	0.00388819	-1.00285	down
gene-SLC19A2	676	816	1030	828	895	669	743	1037	892	988	247	317	300	392	286	281	412	582	431	256	7.92799	9.8616	12.5043	9.81309	9.47639	7.0069	8.57338	11.6209	8.94989	10.5272	2.98535	3.3826	3.2926	4.29561	2.99925	3.09763	4.18446	6.46126	4.73801	2.94356	8.82459e-17	-1.21265	down
gene-SGMS1	2026	1337	1680	2095	1711	1765	2428	1825	1934	1921	944	985	811	977	783	652	1356	786	889	666	15.4614	10.4714	13.287	15.4171	11.3563	11.684	17.0195	12.7864	12.3343	12.5809	7.50557	6.72972	5.57136	6.57839	5.31412	4.54132	8.77485	5.52748	6.09742	4.95953	9.2209e-16	-1.00964	down
NewGene_9858	464	223	974	325	262	769	295	514	469	249	105	31	62	239	47	125	71	69	130	45	7.65573	3.77661	16.5874	5.41335	3.88148	11.3334	4.78486	8.07025	6.62297	3.72252	1.7876	0.462968	0.927435	3.67639	0.683595	1.92702	1.0089	1.05714	1.99763	0.70998	1.98454e-09	-2.19916	down
NewGene_9856	777	378	1180	555	296	1078	401	782	545	356	115	117	88	376	100	168	129	122	203	72	3.6878	1.84901	5.79673	2.66187	1.2696	4.57468	1.87513	3.54829	2.21324	1.53276	0.562083	0.50475	0.387793	1.67102	0.424435	0.749447	0.530972	0.54553	0.902736	0.332781	2.7845e-10	-2.017	down
gene-GAB1	468	445	415	380	451	501	646	515	482	503	845	1174	962	1036	792	902	1077	849	776	899	3.03141	2.98278	2.79188	2.48812	2.61313	2.89696	4.12768	3.23271	2.6756	2.93922	5.66798	6.93993	5.85479	6.29561	4.60051	5.51681	6.07326	5.22295	4.72075	5.74396	1.55883e-28	1.03987	up
gene-UPP1	423	345	252	107	282	171	58	178	352	97	84	166	35	88	76	40	51	136	61	71	10.304	8.51188	6.38604	2.70068	6.31878	3.74457	1.40007	4.17681	7.34618	2.13173	2.13675	3.75374	0.73464	1.98174	1.64677	0.841548	1.03256	3.06639	1.3512	1.705	0.000164875	-1.41604	down
gene-CX3CL1	60	362	227	57	141	70	177	151	109	71	141	594	204	125	347	215	460	254	308	234	0.449331	2.83287	1.75674	0.428821	0.954927	0.464749	1.30101	1.07812	0.695022	0.487044	1.08638	4.04725	1.43279	0.878413	2.32783	1.53574	3.02009	1.80521	2.16583	1.72127	0.00486229	1.0601	up
gene-HSP90B1	20295	11486	8890	10282	14545	16879	12468	14106	25823	10093	5613	5759	4279	6754	4846	4441	6152	5918	7951	4584	201.678	117.67	91.412	103.296	130.484	149.866	122.009	134.001	219.58	91.1053	57.5882	52.0645	39.8192	62.8363	43.0752	41.5207	53.0296	55.6842	74.0424	44.7526	4.2335e-13	-1.26755	down
gene-CD83	64	41	21	22	77	25	50	44	78	6	80	108	31	133	94	78	90	40	115	47	0.797196	0.533454	0.267511	0.350671	1.00575	0.301596	0.620191	0.644888	0.838587	0.065311	1.20555	1.39577	0.375377	1.72152	1.21749	0.931449	1.2096	0.568068	1.61554	0.574521	0.0134541	1.01774	up
gene-RTN4RL1	58	60	61	114	20	89	128	56	78	152	103	180	320	409	152	153	208	89	89	115	0.451097	0.480767	0.489087	0.897488	0.136744	0.617508	0.981758	0.417516	0.514767	1.07196	0.822103	1.27208	2.33375	2.98361	1.05652	1.11969	1.40316	0.65097	0.650433	0.876582	0.000993744	1.23654	up
gene-DACH1	265	151	264	198	113	105	180	223	246	191	419	719	402	295	525	392	182	267	346	299	1.46452	0.847397	1.4895	1.09251	0.557527	0.509756	0.965585	1.1883	1.18121	0.960895	2.36523	3.57527	2.07752	1.56347	2.56705	2.03497	0.861973	1.38074	1.7728	1.60512	2.21926e-05	1.08008	up
NewGene_4747	153	463	479	589	313	425	520	542	318	315	1784	1620	1322	871	1317	1111	2648	997	1478	2536	1.14061	3.49442	4.50298	2.60796	2.7647	2.33733	2.70281	3.88732	2.10009	1.72622	9.03672	6.47814	5.35315	3.35802	13.8278	7.77092	10.3728	7.89417	9.88903	12.7144	2.14672e-16	2.01019	up
NewGene_1999	808	553	223	254	278	222	642	229	281	143	219	189	153	174	119	180	162	155	139	90	21.3551	18.8557	8.04125	8.15918	7.27679	6.8196	21.4426	8.37269	7.36448	3.59511	7.66724	5.94961	4.71437	5.31287	3.13298	5.93625	4.58216	3.82506	4.62764	2.82867	0.000463679	-1.13463	down
gene-KCNS3	43	88	80	62	46	52	111	80	54	37	141	147	147	196	85	201	134	104	66	99	0.492834	1.06049	0.971953	0.724326	0.468602	0.543793	1.29029	0.97513	0.539204	0.387211	1.82405	1.57889	1.61791	2.15055	0.866444	2.36507	1.36311	1.15238	0.975879	1.20955	4.37939e-05	1.10393	up
gene-SH2D4A	57	9	42	10	53	76	27	138	47	175	20	42	26	12	44	26	22	0	44	4	0.514323	0.074716	0.391297	0.090367	0.431665	0.613616	0.240392	1.18654	0.361702	1.4399	0.181896	0.343233	0.213612	0.096247	0.349891	0.217086	0.169285	0	0.370233	0.035487	0.0493726	-1.29927	down
gene-KCNH2	84	5247	481	128	2049	376	630	706	1295	292	78	124	202	97	480	116	137	219	941	230	0.564224	39.1263	3.4542	1.01025	14.1505	2.43038	4.45356	4.81567	8.13808	1.92116	0.481811	0.702699	1.65945	0.585613	3.10343	0.735233	0.835045	1.29565	6.24127	1.67318	0.00810334	-2.01046	down
gene-COL27A1	16	35	26	41	23	19	17	38	33	47	96	179	142	85	53	131	254	163	93	84	0.052656	0.125342	0.091923	0.14203	0.069401	0.059416	0.056653	0.124231	0.097864	0.14691	0.340758	0.577683	0.463527	0.278031	0.163534	0.428566	0.773129	0.545077	0.301169	0.286135	2.66831e-15	2.1741	up
gene-HCRTR1	582	262	377	202	335	257	447	526	555	490	174	213	85	123	92	135	184	169	180	176	5.87808	2.75643	3.95443	1.9812	3.19488	2.33893	4.47424	5.10963	4.89774	4.47933	1.8077	2.02362	0.858037	1.14829	0.798338	1.32536	1.58461	1.64283	1.84997	1.77913	1.2955e-09	-1.30584	down
gene-SLC35E4	1215	1978	1382	732	1480	539	669	1454	1477	1212	286	270	216	357	353	289	471	488	601	487	21.026	35.3005	24.7549	12.8095	23.1296	8.33986	11.3971	24.0696	21.8744	19.0569	5.09787	4.24107	3.49871	5.78353	5.46118	4.7037	7.06896	7.99	9.74255	8.28602	2.60238e-11	-1.57983	down
gene-POSTN	729	4175	389	154	1044	1613	365	2649	4325	1130	272	199	16	275	205	100	350	238	159	35	6.47213	36.1776	3.41773	1.35958	7.53517	12.262	3.01054	21.1915	31.251	8.62517	2.35705	1.47781	0.112124	2.2361	1.53262	0.759829	2.58153	1.88217	1.26089	0.257781	5.50155e-07	-3.05802	down
gene-LTF	877	1169	1052	148	1130	764	324	851	957	282	13	49	11	63	33	30	20	78	48	43	9.87588	13.0957	12.0968	1.66427	11.3994	7.57308	3.52287	9.02159	9.11762	2.83242	0.140373	0.464975	0.102165	0.610306	0.328303	0.292547	0.178642	0.769714	0.467698	0.436884	8.31981e-31	-4.19999	down
gene-TH	32	12	8	0	55	21	31	50	36	0	44	44	65	74	131	119	96	31	53	43	0.424285	0.160761	0.110432	0	0.800988	0.24502	0.402911	0.647037	0.405781	0	0.601277	0.526798	0.942445	1.11017	1.65695	1.70183	1.33071	0.380214	0.758301	0.647799	0.00762627	1.629	up
gene-FERMT1	134	140	98	55	135	67	160	160	104	133	43	59	57	68	53	62	66	27	36	77	0.646676	0.69679	0.487275	0.267698	0.587982	0.289063	0.761607	0.738855	0.427253	0.580572	0.212423	0.259559	0.257778	0.306392	0.232433	0.277846	0.278595	0.123175	0.162939	0.364741	4.37772e-05	-1.01896	down
gene-IQCA1	26	50	30	87	20	58	33	28	29	74	60	65	123	114	27	168	48	59	99	153	0.203714	0.4124	0.243895	0.707463	0.140264	0.410442	0.257242	0.210134	0.193551	0.540823	0.498216	0.47525	0.920815	0.85214	0.193328	1.27152	0.332695	0.449336	0.741555	1.20389	0.00456477	1.1695	up
gene-TNFRSF6B	1940	287	334	77	292	146	91	395	552	135	126	27	32	74	30	27	35	26	26	16	52.6675	8.03216	9.37523	2.10423	7.15209	3.54161	2.42956	10.2511	12.8281	3.30897	3.51221	0.666141	0.80336	1.85915	0.722434	0.689847	0.816813	0.651574	0.648234	0.402793	1.28469e-07	-3.24258	down
gene-LOC112443175	18	84	110	136	14	194	104	79	162	103	236	392	275	529	162	217	224	401	63	27	0.125023	0.620152	0.820828	0.992344	0.090035	1.25414	0.737363	0.542443	1.00227	0.672494	1.76365	2.58018	1.85975	3.58261	1.04849	1.47594	1.40508	2.7472	0.425694	0.189109	0.00430475	1.41272	up
NewGene_14527	483	90	0	119	129	382	231	371	855	193	57	30	0	62	0	0	0	0	93	55	1.91448	0.189568	0	0.272852	0.274201	0.780615	0.464523	0.725932	2.16443	0.358304	0.119925	0.054287	0	0.117537	0	0	0	0	0.177463	0.110047	0.0322865	-3.09355	down
gene-RFX1	1119	610	834	729	773	987	774	1108	990	1198	237	307	557	422	398	430	365	244	483	239	3.38721	1.90228	2.71308	2.23104	2.19298	2.70842	3.33363	3.26914	2.61775	3.37661	0.739309	0.845324	1.57887	1.19398	1.09713	1.22315	0.994329	0.752653	1.36819	0.710672	5.41346e-11	-1.21411	down
gene-CASZ1	178	421	368	394	274	298	499	528	286	477	463	850	934	1080	594	775	902	669	760	725	0.869615	1.57836	1.52737	1.46431	0.962083	1.10278	1.70581	2.04891	1.19961	1.81943	2.34518	2.8886	3.21672	3.87379	2.60018	2.55482	3.27279	2.74819	2.88357	2.6594	2.26164e-09	1.14031	up
gene-ADCY10	93	41	95	66	94	50	46	79	72	47	18	31	20	34	16	33	26	37	51	26	0.440393	0.197328	0.468556	0.313665	0.402215	0.210056	0.212187	0.359503	0.291519	0.201329	0.084696	0.133201	0.086761	0.149636	0.067005	0.14534	0.10385	0.16487	0.224381	0.121278	2.28511e-05	-1.15062	down
gene-LOC789258	393	341	465	462	637	482	353	596	479	477	180	215	171	92	205	137	221	150	231	153	4.90578	4.22112	5.67207	5.38006	6.93443	5.26711	4.15251	6.60993	5.00571	5.0205	2.15525	2.29585	1.74304	1.04014	2.01228	1.48802	2.19629	1.63569	2.44889	1.79531	6.08852e-17	-1.33137	down
gene-PRG4	1138	1620	424	38	3425	908	696	1490	2390	157	117	94	22	66	132	66	141	105	199	37	6.92705	10.0357	2.7639	0.196254	17.9262	4.99141	4.05697	8.66677	11.2991	0.751221	0.639188	0.482394	0.105402	0.354496	0.637441	0.327044	0.667394	0.527062	0.978172	0.224429	1.2571e-09	-3.54823	down
gene-TAGAP	74	91	85	106	92	156	99	71	165	123	192	331	314	436	334	336	369	437	542	432	0.654686	0.841639	0.78015	0.959525	0.738731	1.24532	0.869001	0.607159	1.25662	0.997633	1.77011	2.70924	2.64404	3.67026	2.68412	2.83956	2.87646	3.72262	4.57146	3.81715	4.84245e-25	1.90323	up
gene-BTBD11	1727	465	1105	2070	566	2594	1112	2377	1977	1981	636	397	909	1676	229	437	755	83	125	733	9.76956	2.53244	6.38686	11.4265	2.64635	12.0588	6.04931	12.0951	8.9904	10.2455	3.86773	2.12396	4.78372	8.8655	1.05813	2.41661	3.84349	0.402653	0.596394	3.93412	0.0163682	-1.30981	down
gene-LIMD1	1228	415	534	373	411	788	573	1485	840	675	177	238	252	824	387	374	418	280	274	219	16.7765	5.83575	7.53838	5.1406	5.06608	9.62174	7.70649	19.3993	9.81248	8.37866	2.49152	2.95541	3.22294	10.535	4.73102	4.80857	4.9493	3.6184	3.50108	2.9377	0.0014307	-1.00118	down
gene-LIMD2	273	603	737	148	327	443	298	800	711	392	48	101	39	138	50	88	46	93	95	69	5.58423	12.9825	15.5897	3.10532	6.01424	7.90336	6.01843	15.5491	12.4212	7.24085	1.02435	1.90391	0.716025	2.54066	0.877484	1.73162	0.772328	1.78209	1.87252	1.36637	1.28071e-18	-2.52032	down
gene-AOC3	1639	2684	2049	1965	1562	1614	1694	2246	2540	2079	2838	6039	3478	3194	3987	4318	4745	3512	3568	2870	11.4862	19.3825	14.8522	13.8489	9.88556	10.1094	11.6885	14.9908	15.236	13.2404	20.5391	38.5199	22.8211	20.9692	24.8847	28.4731	28.6851	23.2983	23.4426	19.7686	1.46129e-15	1.01453	up
gene-SLC7A8	542	132	635	939	128	946	243	898	1761	648	182	94	48	97	12	34	100	23	18	25	3.80268	0.925667	4.69245	6.62125	0.785983	5.78607	1.62896	5.9801	11.1231	4.04734	1.27669	0.581106	0.303138	0.614834	0.071992	0.215936	0.590524	0.147431	0.114386	0.165817	3.94751e-09	-3.31468	down
gene-PROM1	243	233	199	54	215	99	72	81	128	64	26	140	23	48	59	31	87	67	74	105	1.90115	1.87424	1.60804	0.420217	1.51651	0.689574	0.551142	0.602495	0.857658	0.448491	0.206246	0.995953	0.163095	0.350896	0.41316	0.22516	0.587203	0.496035	0.542984	0.803886	0.0119166	-1.03187	down
gene-ASPN	294	2885	1152	523	2636	1534	2032	796	3181	331	367	1216	242	269	328	228	1030	822	785	216	3.43025	34.7009	13.8979	6.1616	27.7636	15.9854	23.3383	8.87045	31.7511	3.50638	4.41076	12.9061	2.64077	2.93231	3.42298	2.49947	10.4238	9.07693	8.58176	2.46579	0.0067082	-1.42756	down
gene-KIAA0408	253	103	80	290	63	535	166	194	156	470	172	511	651	341	398	1049	651	239	802	431	1.4312	0.46487	0.467421	1.65713	0.319528	2.70391	0.716257	1.04846	0.661739	2.41709	1.00057	2.62959	3.45235	1.80575	2.01454	5.58502	3.19699	1.27892	4.25368	2.39776	0.00255853	1.2547	up
gene-CCL21	0	169	20	59	144	10	144	110	72	76	358	331	317	170	109	304	188	320	52	182	0	5.60492	0.646891	1.91621	4.18107	0.281296	4.54948	3.38585	1.98067	2.20794	11.8977	9.70632	9.57299	5.12246	3.13159	9.21032	5.25245	9.74468	1.55486	5.746	0.0159981	1.64937	up
gene-DACT3	15	53	22	39	11	24	33	41	55	17	53	154	34	29	31	76	169	86	132	101	0.144951	0.531772	0.225098	0.381213	0.09096	0.212061	0.321764	0.386103	0.459569	0.151107	0.532844	1.37901	0.3134	0.264049	0.268205	0.70588	1.44447	0.799832	1.21767	0.973555	0.000104954	1.53575	up
gene-MICU3	1528	2740	3115	1300	2531	2713	1926	3309	2224	2187	691	1271	689	1079	675	684	1087	1533	631	698	9.36165	17.2036	19.5766	8.00584	13.9191	15.1676	11.5573	19.5815	12.0341	12.0628	4.35959	7.03243	3.92909	6.21981	3.67491	3.93676	5.73721	8.82554	3.59888	4.15808	3.84072e-12	-1.30675	down
gene-TENM4	72	66	85	51	108	82	134	50	113	58	233	155	56	130	126	99	204	231	162	160	0.142944	0.134207	0.174378	0.101084	0.193318	0.144769	0.263012	0.093804	0.192238	0.104738	0.478415	0.280428	0.103179	0.242587	0.22409	0.184771	0.351409	0.435459	0.301826	0.312405	0.000157566	1.01997	up
gene-RAB15	67	40	41	24	35	19	19	27	35	18	73	59	44	88	56	47	74	113	41	49	0.567279	0.35118	0.359678	0.203952	0.263011	0.142199	0.15364	0.218076	0.254408	0.134186	0.64242	0.451987	0.347314	0.697264	0.421624	0.376114	0.541504	0.910131	0.327081	0.406833	0.000715832	1.05734	up
gene-FBXO15	300	85	166	160	53	274	120	172	191	141	59	77	70	117	70	94	78	72	67	71	4.7632	1.33314	2.75049	2.60348	0.725003	3.71884	1.82917	2.37064	2.67016	1.96261	0.923497	1.11828	1.05398	1.66924	0.875448	1.39794	1.05203	1.09778	1.01709	0.918919	0.000338625	-1.02139	down
gene-NUPR1	417	989	614	485	433	623	1020	625	494	467	160	372	280	349	241	368	515	251	152	164	20.0797	49.1285	30.6122	23.6388	18.8191	26.8366	48.3929	28.7879	20.3417	20.417	7.93301	16.2908	12.6151	15.7388	10.3823	16.6592	21.54	11.4434	6.82461	7.76715	1.17045e-05	-1.05858	down
gene-TRIM2	528	831	612	390	1248	645	1049	592	752	762	898	1364	1262	989	1443	1056	1679	1548	2270	1614	1.89891	3.08037	2.27926	1.41742	4.05218	2.07378	3.7145	2.03549	2.32943	2.48794	3.33771	5.29226	4.25027	3.33038	4.6446	3.5731	5.24119	5.27314	7.65703	5.70548	5.83781e-07	1.01914	up
gene-CNGA3	6	28	17	12	24	30	37	28	41	6	37	71	63	41	58	64	62	69	49	36	0.039891	0.194874	0.118952	0.082095	0.147895	0.178459	0.247049	0.181294	0.240311	0.037486	0.259809	0.443158	0.405855	0.259052	0.354687	0.415309	0.367443	0.452343	0.314125	0.238915	1.88891e-05	1.36438	up
gene-SLC25A22	390	232	164	69	156	103	96	162	311	47	116	31	37	93	45	42	82	41	62	32	4.22277	2.57899	1.83715	0.768604	1.51731	1.01944	1.05135	1.67945	2.94729	0.402109	1.29474	0.263416	0.326984	0.957747	0.375662	0.432055	0.67034	0.363208	0.621915	0.291117	0.000213322	-1.47387	down
gene-BHLHE41	510	487	696	798	459	874	652	702	607	975	1542	1407	1251	2080	1232	1351	1880	1845	1067	2110	4.10198	4.03852	5.79722	6.49617	3.33609	6.28272	5.1672	5.40191	4.17666	7.12969	12.8182	10.3991	9.42656	15.6811	8.87457	10.2323	13.1306	14.0658	8.04597	16.6879	8.77605e-14	1.3107	up
gene-DTX1	139	148	159	90	161	216	111	196	246	123	393	354	326	542	231	341	377	217	301	211	0.989426	1.09011	1.22996	0.645321	1.02969	1.36909	0.925554	1.39478	1.62531	0.813127	3.18529	2.35239	2.30967	3.96947	1.65213	2.40469	2.4387	1.51193	2.05224	1.51132	9.69683e-09	1.15498	up
gene-PITX3	798	1848	1750	464	1756	1236	662	1824	1641	637	584	279	481	390	481	611	313	491	390	357	11.5323	29.3623	27.6103	7.11852	24.2599	16.9836	9.60655	25.9663	21.9436	8.58377	8.98287	3.85055	6.74541	5.47384	6.39167	8.95038	3.99462	6.58265	5.18633	5.28829	2.76543e-07	-1.39918	down
gene-MAFF	33633	15463	20303	14324	35037	31636	13777	25370	22368	18176	2100	3591	6826	12859	8099	4724	2320	1738	4311	2129	422.621	199.536	262.98	181.267	395.917	355.571	169.812	311.209	239.582	213.486	27.1367	40.8905	81.9771	150.71	90.682	55.6373	25.1844	20.5908	50.6788	26.1814	2.80399e-07	-2.14319	down
gene-IRS2	6072	2337	4198	2397	7749	5409	3402	5274	4584	3818	1400	1599	1740	2637	3588	1458	1344	1217	2145	667	23.9897	9.51673	17.1605	9.57281	27.638	19.0913	13.2349	19.9187	15.4948	13.7005	5.71076	5.746	6.43522	9.75361	12.6807	5.41728	4.60442	4.5512	7.94047	2.58685	6.74751e-06	-1.25128	down
gene-HMGCLL1	8	12	44	41	6	3	43	4	8	16	54	112	39	29	28	67	64	108	28	76	0.0596	0.092247	0.361118	0.327561	0.041535	0.020207	0.327167	0.028959	0.049934	0.106913	0.431292	0.788819	0.279496	0.20802	0.191787	0.484229	0.441249	0.821127	0.203691	0.57704	0.00116868	1.74832	up
gene-TCF15	175	154	341	477	93	283	274	223	331	339	444	693	719	188	602	936	648	1044	982	692	4.60055	4.1708	9.26709	12.6951	2.20479	6.64968	7.10238	5.59179	7.44529	8.10634	12.0646	16.5796	17.7132	4.63309	14.1779	23.173	14.7885	26.0333	24.2121	17.8874	1.58976e-06	1.44904	up
gene-AKAP7	79	88	216	221	169	180	309	229	107	156	354	575	233	247	274	359	334	335	406	595	0.857252	0.772439	2.13546	2.25483	1.72354	1.53491	2.90247	1.88108	0.803719	1.27328	3.53769	4.94833	2.05843	2.0714	2.3474	3.52975	2.79583	3.24686	3.60624	6.09614	1.53841e-05	1.16661	up
gene-CD163	2210	1042	617	385	2160	716	2725	1518	2971	691	513	585	270	706	700	688	261	365	187	132	16.1921	7.87168	4.67694	2.85455	14.2927	4.68182	19.691	10.6635	18.6326	4.60623	3.88499	3.89915	1.85116	4.84618	4.59625	4.74494	1.6674	2.52549	1.28333	0.944026	0.000212329	-1.65427	down
gene-CTXN1	127	64	98	81	76	50	57	80	156	74	17	24	28	39	20	20	49	66	26	44	2.90016	1.51619	2.3183	1.8609	1.5647	1.01642	1.27489	1.73985	3.06459	1.53267	0.398104	0.499512	0.596753	0.828898	0.407386	0.419814	0.977148	1.42438	0.545636	0.978949	1.29155e-05	-1.29119	down
gene-USP43	73	20	29	32	0	32	48	39	22	48	82	57	50	117	52	39	87	82	34	61	0.377656	0.105807	0.154504	0.16874	0	0.147872	0.246831	0.193677	0.095968	0.227502	0.442518	0.268806	0.242904	0.57105	0.24146	0.187812	0.39243	0.406307	0.1641	0.309792	0.0315587	1.01648	up
gene-CYGB	81	190	160	152	56	78	75	183	165	163	448	527	365	281	231	424	431	585	433	294	1.14036	2.79369	2.35437	2.17692	0.720701	0.995811	1.04207	2.46902	2.01881	2.09326	6.59402	6.85121	4.8806	3.77643	2.95344	5.70422	5.33945	7.90078	5.8141	4.11198	8.86762e-13	1.71017	up
gene-ZNF385D	99	233	127	101	184	141	143	108	178	123	302	323	265	313	210	191	305	463	277	162	0.68818	1.52447	0.8424	0.709093	1.15427	0.846453	0.979407	0.719943	0.964567	0.776241	2.17101	1.86301	1.57599	2.03797	1.18966	1.19705	1.73622	3.05628	1.644	1.00751	2.29591e-07	1.05221	up
gene-LOC100847773	403	458	582	306	394	352	318	583	423	450	140	222	129	151	142	121	106	160	207	115	3.30956	3.87042	4.9053	2.51641	2.93067	2.59063	2.57143	4.55731	2.98734	3.34303	1.16773	1.63746	0.988871	1.16355	1.02883	0.940984	0.746885	1.25151	1.59936	0.943235	8.80574e-19	-1.42893	down
gene-CRELD2	1380	810	946	652	917	880	695	962	2003	669	300	318	188	367	256	408	352	356	498	292	28.0975	16.9933	19.9276	13.4197	16.8507	15.9971	13.9292	18.7267	34.8993	12.3704	6.29424	5.88338	3.58245	6.97912	4.65394	7.80186	6.20151	6.84828	9.50361	5.83598	1.92291e-13	-1.47207	down
gene-PLEKHH3	163	509	232	282	109	180	162	353	297	273	616	888	1051	533	469	427	1112	554	885	950	1.5968	5.17838	2.3897	2.80617	0.898079	1.57563	1.46505	3.40677	2.52016	2.39942	6.24276	8.01054	10.1817	4.89903	4.15261	3.919	9.40364	5.18644	7.98309	9.25303	4.80733e-10	1.63028	up
gene-LOC407145	161	280	74	102	225	92	177	147	159	169	202	496	350	127	584	177	371	252	417	400	1.10222	1.97534	0.524882	0.702845	1.38771	0.561515	1.18982	0.96223	0.932302	1.05286	1.4272	3.09019	2.24776	0.815061	3.57732	1.13648	2.20433	1.63213	2.67462	2.69438	8.89817e-05	1.17	up
gene-TIPARP	6729	2408	3042	1349	7749	5432	2974	4950	6003	1684	1057	1552	2123	4048	1460	676	979	816	1165	659	48.6751	17.9554	22.769	9.85964	50.599	35.1084	21.1833	34.2264	37.1512	11.0632	7.89404	10.209	14.3783	27.4113	9.44254	4.60103	6.13736	5.58713	7.89434	4.68072	0.000711794	-1.43995	down
gene-LOC101903647	40	60	73	19	38	25	64	69	58	126	129	137	155	92	82	78	249	455	87	170	0.203463	0.318514	0.408451	0.100044	0.178264	0.113208	0.336168	0.355769	0.262221	0.609029	0.70608	0.668169	0.75968	0.449004	0.378471	0.389669	1.13087	2.36074	0.423339	0.870981	2.22487e-05	1.60159	up
gene-LOXL4	703	953	495	167	1113	753	566	795	1624	199	440	297	300	468	267	320	300	180	312	205	5.50072	7.51387	3.96393	1.27921	7.79776	5.20413	4.30866	5.87106	10.6729	1.38006	3.47177	2.06085	2.17103	3.34807	1.83794	2.28548	1.98066	1.29278	2.23172	1.52736	0.00082533	-1.12412	down
gene-MANF	3515	1889	1722	1400	2507	2819	1639	2346	3957	1784	956	820	809	1396	1016	894	894	1137	1548	872	118.759	65.7917	60.2015	47.8205	76.4678	85.0952	54.5266	75.7673	114.41	54.7611	33.3528	25.1973	25.5739	44.1536	30.7007	28.399	26.1959	36.3609	49.0076	28.929	4.17455e-08	-1.08581	down
gene-STAC	283	86	189	113	88	175	151	118	249	155	517	444	202	384	339	327	453	209	355	298	3.07662	0.949503	2.13453	1.22623	0.865659	1.67893	1.63144	1.23718	2.29299	1.52066	5.851	4.4611	2.05207	4.01792	3.359	3.42687	4.26192	2.17782	3.58545	3.18746	7.36611e-07	1.22202	up
NewGene_13913	999	167	80	132	356	665	183	341	327	186	23	51	102	427	82	169	27	6	50	2	3.94314	0.566267	0.321553	0.527229	1.29662	2.18328	0.785523	1.1549	1.08677	0.555825	0.076868	0.152877	0.41193	1.47887	0.266081	0.562861	0.084689	0.017964	0.152047	0.006249	0.027951	-1.79236	down
NewGene_1601	400	66	424	687	499	559	628	323	371	74	1271	1068	511	155	698	358	1896	722	1023	870	1.81243	0.579402	1.98844	3.15008	2.04132	2.26491	3.40429	1.39732	1.43867	0.326287	5.95004	4.4055	2.16767	1.26082	2.83056	1.52771	7.4596	3.10073	5.0682	3.87433	0.0278427	1.13738	up
gene-DZIP1L	47	72	108	33	42	22	62	85	53	65	101	166	128	30	124	112	178	103	126	83	0.246877	0.406203	0.614417	0.17437	0.202919	0.103865	0.32246	0.44484	0.239477	0.316759	0.578497	0.803895	0.661289	0.149091	0.591632	0.580545	0.852651	0.518106	0.649967	0.432552	0.000879143	1.04029	up
gene-ASF1B	4	26	24	10	27	23	52	50	23	34	56	70	33	63	44	41	66	81	53	41	0.051016	0.415822	0.394837	0.154406	0.374672	0.324302	0.806255	0.760864	0.302027	0.486396	0.919365	1.00924	0.482904	0.93654	0.625434	0.614742	0.909211	1.22066	0.785008	0.635098	0.00133014	1.09935	up
gene-IL3RA	138	117	124	13	118	65	66	60	131	9	24	44	8	11	6	5	14	70	62	6	2.15245	1.95266	2.05254	0.19497	1.6845	0.913643	0.985751	0.918206	1.80686	0.112768	0.368252	0.648903	0.102915	0.14896	0.073324	0.065552	0.185191	1.02901	0.890152	0.083063	0.0055505	-1.6871	down
gene-LOC515150	190	154	87	109	290	200	487	284	231	159	406	972	325	558	662	609	397	388	270	164	3.08295	2.57919	1.45273	1.78753	4.24747	2.90089	7.79159	4.39926	3.20694	2.33521	6.80218	14.3744	4.94469	8.48873	9.61838	9.31516	5.59189	5.9697	4.10134	2.60446	0.000198969	1.19776	up
gene-REM1	77	191	295	260	95	296	283	304	205	300	999	809	764	767	717	959	960	523	948	585	1.39032	3.69943	5.71619	4.81141	1.58501	4.84112	5.14743	5.42146	3.20098	5.04327	18.9899	13.7809	13.2304	13.4139	11.8752	16.5354	15.4986	9.38804	16.3627	10.6855	2.14672e-16	1.89457	up
gene-LOC112441493	278	76	219	186	295	352	240	340	405	554	629	741	73	1228	847	695	976	1226	476	1125	1.42592	0.390366	1.13133	0.955048	1.37277	1.63068	1.2415	1.66667	1.75498	2.59973	3.40656	3.57113	0.336969	5.93648	3.93792	3.38553	4.40367	5.99164	2.23517	5.78268	2.43525e-05	1.54355	up
gene-LOC112441490	30	16	23	19	34	19	20	14	42	32	75	112	59	88	156	80	40	93	91	90	0.274456	0.149993	0.210957	0.172807	0.281877	0.151463	0.180965	0.115358	0.324119	0.264046	0.712904	0.936355	0.500672	0.758804	1.28001	0.692481	0.318316	0.805666	0.785823	0.814337	8.3606e-13	1.93256	up
gene-TNFAIP6	1047	1474	420	222	1895	528	838	325	1729	241	106	216	164	217	131	174	271	99	109	65	25.9761	36.3845	10.8292	5.55166	41.6357	11.5266	20.0151	7.55148	36.4032	5.22504	2.76565	4.60295	3.84699	5.16885	2.72062	3.75554	5.6784	2.51827	2.35797	1.54724	1.30274e-10	-2.41581	down
gene-SEC14L5	184	446	213	78	464	189	183	249	241	218	194	722	653	284	1252	412	572	846	1356	503	1.08247	2.49347	1.22681	0.461257	2.36992	0.913468	0.994739	1.43716	1.09917	1.14264	1.19054	3.70464	3.33536	1.50065	6.16853	2.09929	2.90899	4.33017	7.16671	2.79159	8.13297e-06	1.54636	up
gene-PPARA	11187	14523	11305	7383	17318	10914	9308	15559	11579	9517	3766	4237	4354	5153	6975	5876	6805	5533	6025	4906	34.955	47.5052	36.4976	28.8881	48.9024	30.4692	28.7408	47.2198	30.9951	27.1236	15.8612	15.0998	16.9978	19.7237	19.4566	17.2873	18.5242	16.554	17.867	15.1156	3.26488e-12	-1.05789	down
gene-PPARD	2772	1660	1667	837	1244	1327	791	1534	1369	1097	399	601	531	922	673	637	595	343	575	346	23.241	14.2143	14.4345	7.01822	9.39053	9.97859	6.46238	12.23	9.73462	8.30511	3.44641	4.63426	4.15771	7.1618	5.03116	5.03165	4.30787	2.71438	4.54103	2.84167	5.49465e-08	-1.27653	down
NewGene_9804	108	313	139	45	628	114	160	157	370	59	0	11	0	0	14	0	0	0	21	0	0.898877	4.02804	1.65312	0.543966	7.64426	1.27132	1.79086	1.75502	4.41105	0.561376	0	0.128636	0	0	0.133228	0	0	0	0.247474	0	8.52058e-07	-5.43158	down
gene-HFE	35	56	93	31	90	59	116	117	50	162	180	258	176	131	159	169	167	149	107	148	0.277982	0.470579	0.782165	0.253621	0.657766	0.425328	0.928793	0.947613	0.343383	1.23375	1.53662	1.91582	1.37016	0.996912	1.16646	1.4111	1.23228	1.14258	0.810351	1.20463	7.73511e-05	1.12249	up
gene-MTHFD1L	843	659	379	178	489	267	270	322	559	162	166	179	94	132	137	84	148	89	135	86	6.64731	5.3568	3.08571	1.41623	3.47874	1.87965	2.0951	2.41588	3.77352	1.15909	1.34719	1.27856	0.687297	0.974822	0.964589	0.622538	1.00624	0.658057	0.992559	0.66057	1.80775e-08	-1.64928	down
gene-SPTBN4	597	101	598	182	108	513	361	966	385	276	24	41	28	255	38	30	40	39	46	27	1.89411	0.329728	2.07378	0.582831	0.308554	1.45382	1.19744	3.11602	1.04579	0.800168	0.077599	0.116852	0.080381	0.765299	0.107755	0.087195	0.109377	0.114798	0.136162	0.083045	1.84745e-07	-2.75977	down
gene-SHISA3	31	969	80	29	1144	71	65	155	140	36	11	22	141	15	9	43	45	38	12	41	0.482009	15.8934	1.31159	0.462635	16.4246	1.00877	1.01733	2.35386	1.90645	0.514181	0.175274	0.304046	2.09798	0.222729	0.113899	0.630453	0.615772	0.567178	0.1763	0.627695	0.000936682	-2.74109	down
gene-KIAA1549	19	50	23	39	20	34	30	44	37	58	48	107	114	147	60	51	88	76	38	58	0.25816	0.707996	0.321657	0.550554	0.241555	0.4201	0.411766	0.586108	0.434389	0.733422	0.681241	1.36064	1.49215	1.92278	0.743555	0.661988	1.06343	0.998112	0.494466	0.783982	4.24825e-05	1.23367	up
NewGene_148	77	170	139	84	155	103	138	103	105	88	33	57	34	25	54	48	81	68	81	35	2.64372	4.36467	3.58329	2.10179	3.48763	2.29301	4.67957	3.3609	2.22923	2.70936	0.828937	1.28521	1.09513	0.567303	1.59168	1.11315	1.81853	1.84892	1.89214	0.927642	3.96855e-06	-1.10725	down
gene-AMOT	1638	561	1126	1310	861	1248	1272	1252	1232	1187	2911	3284	3268	3473	2779	2063	3547	2237	2170	3669	6.0765	2.21515	4.17261	4.80892	2.92914	4.15581	4.56632	4.6728	3.85631	4.01925	11.1986	10.903	11.4381	11.729	8.96217	7.9313	11.6254	7.71163	7.41336	14.4505	1.08071e-15	1.41623	up
gene-SERTM1	110	125	222	94	129	69	157	107	193	102	76	50	30	64	24	35	56	30	28	27	1.11363	1.04193	1.96121	0.784576	0.943892	0.500443	1.35643	0.830951	1.48839	0.747604	0.631995	0.367518	0.228761	0.482027	0.172345	0.264045	0.38909	0.234523	0.211187	0.211117	1.81657e-08	-1.54346	down
gene-LOC781423	636	1806	794	199	3574	256	654	610	698	935	151	96	83	31	604	145	229	196	848	321	8.97605	26.4499	11.6124	2.86313	45.6254	3.22894	9.10257	8.29687	8.45251	12.0101	2.21558	1.21532	1.09177	0.399989	7.63822	1.91504	2.80245	2.61142	11.2346	4.45008	0.00565568	-1.81371	down
gene-SLC46A2	145	155	247	143	165	170	162	195	134	116	23	29	41	262	49	24	18	15	19	17	1.74881	1.93515	3.09393	1.75218	1.8021	1.83864	1.923	2.25322	1.38447	1.2738	0.275697	0.309532	0.462786	2.97368	0.526914	0.272014	0.184603	0.168143	0.208063	0.193125	0.0011532	-1.62938	down
gene-TMEM158	231	196	68	59	85	78	38	74	280	49	24	77	16	30	40	18	32	27	21	18	3.93678	3.43986	1.18924	1.01994	1.31233	1.17907	0.633674	1.20373	4.09668	0.756699	0.417619	1.18732	0.256178	0.479411	0.605962	0.28456	0.464364	0.423638	0.32254	0.295469	5.12304e-06	-1.86833	down
gene-DIO2	602	1581	562	171	1850	438	670	3433	940	249	144	312	71	73	126	48	235	197	173	110	2.63015	7.12504	2.53947	0.751885	7.30334	1.70878	2.88369	14.3516	3.51619	0.987713	0.649805	1.23998	0.288301	0.298478	0.490454	0.197042	0.888345	0.812879	0.707771	0.472541	4.31965e-08	-2.73984	down
gene-VCAM1	133	153	142	153	140	127	196	72	90	145	432	524	217	197	353	259	344	241	355	220	1.4343	1.70236	1.57558	1.65931	1.3341	1.25698	2.06102	0.731188	0.83676	1.4034	4.84924	5.17922	2.17908	1.97573	3.41611	2.61326	3.22971	2.47288	3.59572	2.35042	8.84207e-09	1.28291	up
gene-LGALS9	585	669	630	593	499	356	632	635	957	687	1072	1616	969	660	1372	1205	1116	1278	1576	1057	10.4284	12.0458	11.4642	10.5229	7.85489	5.63701	10.8372	10.7568	14.4135	10.9425	19.42	25.8413	15.9345	10.9265	21.5358	19.4925	16.9689	20.892	25.9886	18.3253	3.36297e-10	1.0245	up
gene-MKL1	847	437	533	736	266	631	518	642	983	800	1391	1526	1462	1576	935	1566	2597	1044	698	1440	5.19578	2.74539	3.33507	4.60188	1.45379	3.4468	3.14852	3.78602	5.13798	4.49938	8.97462	8.54943	8.4812	9.10843	5.12358	9.11997	14.039	6.14281	4.03038	8.81714	8.29357e-08	1.23257	up
gene-HMOX1	6242	8558	8204	3190	6139	3741	3927	8383	7123	5717	897	1106	1057	2785	1703	1855	1054	1095	2040	901	110.731	156.517	150.613	57.1984	98.3111	59.2967	68.5952	142.167	108.127	92.1267	16.4187	17.8355	17.5491	46.2575	27.0206	30.9579	16.2206	18.3901	33.9084	15.6902	8.82459e-17	-1.98364	down
NewGene_8910	134	88	72	82	94	47	156	75	159	60	174	445	60	652	264	198	233	114	70	71	1.70413	1.15588	0.967818	1.06454	1.06842	0.543776	1.98932	0.933054	1.7866	0.671427	2.33372	5.33257	0.703045	8.16304	3.12102	2.37445	2.73181	1.36709	0.817441	0.889393	0.00211702	1.29845	up
gene-ANGPT4	30	111	108	55	46	13	44	49	19	38	129	178	312	122	93	214	228	152	164	153	0.294195	1.14108	1.10949	0.550823	0.412549	0.115257	0.428113	0.463378	0.155136	0.338058	1.33358	1.61523	2.92494	1.14398	0.830551	2.01193	1.98069	1.43348	1.53583	1.49996	3.41241e-07	1.83256	up
gene-HSPA5	29465	15622	15109	15009	27246	28714	18070	24532	42252	19286	8142	7608	7558	11632	9273	7997	7780	9092	17159	9039	330.935	178.738	172.515	168.736	272.344	283.839	198.008	259.029	401.282	193.771	92.936	77.2046	78.3279	120.574	91.8983	83.1939	74.7634	95.0672	180.513	97.9854	4.43931e-09	-1.19366	down
gene-EEPD1	956	1520	1261	691	1567	1009	1063	1650	1424	1004	1589	3461	2935	3851	3445	2076	1719	1448	1949	1733	9.67396	15.8591	13.2017	7.04718	14.274	9.11624	10.5829	15.9973	12.3131	9.22553	16.5959	31.8979	27.8745	36.5623	31.2408	19.8301	15.0849	13.8679	18.4926	17.2532	2.9615e-07	1.09201	up
gene-RSRP1	1869	2039	2376	2090	2561	2541	2228	1951	3170	2358	877	1090	842	1147	1371	562	1147	1048	1470	576	35.6344	33.8422	38.9588	40.3617	38.7368	37.1386	38.2223	29.3213	44.3746	35.3287	14.4475	15.7192	13.718	17.7886	23.3298	9.2992	15.9066	16.3153	25.9813	9.01552	9.14342e-13	-1.11047	down
gene-BRB	225	196	71	140	507	346	708	321	761	237	693	1121	461	1025	1076	876	503	538	341	254	7.3506	6.56996	2.38888	4.61705	14.8533	10.1056	22.7473	10.026	21.2942	6.9329	23.1755	33.1646	14.0049	31.2854	31.4104	26.9521	14.2174	16.5	10.4193	8.12929	0.00520295	1.09046	up
gene-FST	45	26	68	66	40	25	55	23	18	45	137	349	101	151	104	198	187	89	115	102	0.773637	0.50822	1.48017	1.21978	0.747352	0.402268	1.09245	0.472485	0.275321	0.829558	2.70957	6.46962	1.84767	2.78323	1.80369	3.73272	3.24428	1.72704	2.1394	2.06583	3.93638e-10	1.9319	up
gene-CRLF1	42	189	97	30	365	126	117	334	450	47	75	47	49	46	105	90	93	24	146	89	0.729046	3.39586	1.73913	0.523876	5.75139	1.96099	2.0133	5.57241	6.73135	0.732813	1.34434	0.742394	0.79596	0.747821	1.63264	1.48021	1.4002	0.39164	2.39097	1.52804	0.0311207	-1.08247	down
NewGene_9067	2331	2362	3322	2241	1903	2508	3189	2536	2708	1899	376	998	582	871	596	510	850	928	546	544	11.8921	12.6082	17.9067	9.2219	13.81	9.54436	15.5792	11.3632	10.09	7.73945	1.76717	4.34421	2.43731	3.68851	2.70342	2.36196	4.55466	4.61056	2.35611	2.68613	4.71991e-33	-1.81448	down
gene-TENT5C	1604	1627	354	486	1244	973	648	806	1021	716	369	204	423	364	452	187	296	366	971	447	7.71992	8.12808	1.76169	2.36311	5.405	4.18131	3.0703	3.70534	4.21253	3.12482	1.8303	0.889086	1.90106	1.63963	1.94585	0.843485	1.23645	1.66408	4.37927	2.11232	0.000891755	-1.11862	down
gene-SLC30A3	400	547	248	203	456	290	221	333	305	227	104	84	109	155	121	64	130	86	47	63	3.60518	7.37845	3.40587	2.85856	4.73265	3.33402	2.95878	4.15447	2.92769	2.87798	1.35943	1.06762	1.23493	1.91422	1.50839	0.350258	1.56592	1.12873	0.594021	0.363628	8.39034e-12	-1.66456	down
gene-MGC138914	199	119	271	89	88	172	198	77	47	81	87	563	155	1445	46	283	226	103	286	919	1.75973	1.0789	2.47943	0.796445	0.699172	1.35973	1.72045	0.647461	0.352221	0.648669	0.818313	4.53829	1.28488	12.4309	0.359512	2.35777	1.73212	0.857674	2.36869	8.29743	0.00747144	1.68133	up
gene-SMIM10	35	79	61	66	21	64	35	53	42	49	104	185	71	45	69	104	140	129	55	75	0.509589	1.21396	0.934502	0.992931	0.282923	0.853816	0.512334	0.756795	0.537201	0.658984	1.60328	2.51271	0.987305	0.626438	0.921755	1.45362	1.81778	1.82563	0.764193	1.08903	0.000889105	1.00579	up
gene-PTI	93	96	67	78	162	123	159	199	68	75	603	640	612	933	896	839	580	509	250	432	2.91765	3.10023	2.16188	2.44887	4.58881	3.43329	4.89061	5.95214	1.8218	2.11244	19.5467	18.2821	17.9786	27.4232	25.1537	24.7775	15.789	15.1272	7.352	13.3243	5.80229e-25	2.58809	up
gene-KLF15	1936	1382	3046	1062	2106	2638	2093	3364	2886	1571	327	681	664	1058	1073	813	570	655	880	422	23.2062	17.0805	37.7896	12.8629	22.7824	28.2519	24.7072	38.5565	29.6114	17.1063	4.04187	7.42371	7.44619	11.877	11.5	9.16938	5.91979	7.4336	9.87315	4.95613	1.24197e-11	-1.52842	down
gene-SFRP4	217	2974	477	189	2267	966	1142	1155	1363	418	269	510	451	300	477	615	642	481	854	391	3.62346	51.2645	8.25169	3.18044	34.2106	14.4201	18.7999	18.4535	19.5018	6.3481	4.63165	7.74872	7.05322	4.68672	7.12708	9.6623	9.30494	7.61621	13.3725	6.41392	0.0347682	-1.07223	down
gene-SFRP2	16	139	97	106	59	35	41	125	53	50	144	331	142	101	132	270	272	220	137	137	0.221131	1.97814	1.37555	1.47297	0.728049	0.431927	0.55325	1.65273	0.625914	0.628176	2.04617	4.15629	1.82851	1.30692	1.62475	3.51433	3.2583	2.87387	1.77155	1.85109	3.94276e-05	1.44005	up
gene-ARAP2	55	63	68	16	85	38	71	68	106	28	44	39	4	33	17	4	19	56	20	22	0.192322	0.227249	0.245763	0.055808	0.269821	0.11808	0.246737	0.228751	0.319023	0.089425	0.157641	0.124166	0.011992	0.107473	0.051805	0.013002	0.057609	0.179884	0.066075	0.074478	0.0203298	-1.10524	down
gene-DNAJB9	7287	4016	4959	3696	7693	8576	3528	8717	6222	4621	1994	2030	2499	2416	2357	1897	2168	2262	2290	2384	83.5917	47.495	58.8765	42.8771	79.6287	87.8498	39.8458	95.5343	61.048	48.1428	23.6431	21.2216	26.856	25.9575	24.196	20.4893	21.5733	24.5875	24.6383	26.8979	6.46866e-14	-1.30962	down
NewGene_2937	285	69	242	209	99	332	362	166	145	131	19	25	27	298	20	40	9	61	19	13	4.16162	1.03664	3.64964	3.08431	1.30577	4.33339	5.20449	2.30586	1.81228	1.72788	0.272475	0.325071	0.365991	4.07698	0.250463	0.543293	0.113921	0.843273	0.256274	0.172582	0.00430587	-1.86998	down
gene-SLC16A6	10161	158	7008	6368	842	7727	5045	5472	5270	4192	1366	2710	2191	5341	461	1541	2143	912	258	1271	148.16	2.36782	105.743	93.8724	11.0778	100.662	72.4384	76.268	65.7439	55.5238	20.5516	35.9413	29.913	72.9157	6.00915	21.133	27.1004	12.5806	3.5186	18.2085	0.0271219	-1.46466	down
gene-HK2	10811	4272	8047	3890	8601	12631	4861	17435	10904	4719	1351	2119	1514	12718	1827	2281	1600	1571	1274	1550	56.6844	23.0911	43.6596	20.6186	40.7139	59.1753	25.0993	87.3965	48.921	22.4752	7.31428	10.1061	7.43392	62.44	8.56823	11.2509	7.27437	7.79745	6.25903	7.98491	0.0024018	-1.53117	down
gene-AMIGO2	109	392	135	122	214	305	210	114	131	96	340	346	197	222	314	259	501	533	481	492	1.01942	3.78475	1.30607	1.15521	1.81186	2.55535	1.9342	1.02241	1.04737	0.812203	3.29028	2.95371	1.73077	1.9477	2.63543	2.28381	4.07855	4.73227	4.22971	4.53193	0.000314239	1.08494	up
gene-THEM6	29	29	35	28	17	26	40	83	16	45	48	33	40	86	81	101	74	85	126	75	0.372752	0.378189	0.469497	0.362871	0.197097	0.299883	0.507914	1.02972	0.168966	0.522002	0.642514	0.382138	0.48772	1.04298	0.940646	1.23549	0.830416	1.04193	1.53484	0.951743	0.000404708	1.20049	up
gene-SEMA7A	783	208	1344	1068	1332	1364	1108	1224	1352	963	1445	2135	2328	3994	3251	2364	1384	1657	1612	1323	7.63897	2.18802	12.2965	9.79612	10.9322	11.482	10.1809	11.062	10.545	7.88492	14.5891	18.8579	19.6027	35.3904	27.0661	21.0354	11.6546	14.3605	14.5904	12.4077	0.000138537	1.10256	up
gene-RHOBTB1	1229	572	679	1573	397	1408	1904	1214	1479	1823	2358	3743	3019	3135	2809	2175	3425	2341	2228	3123	8.90349	4.41817	5.00635	11.7218	2.50214	9.09838	13.1806	8.22373	9.20543	11.9049	17.1811	24.0292	20.3596	20.7808	17.7956	14.4761	21.2119	16.05	14.6739	22.0809	1.28591e-07	1.29142	up
NewGene_8419	82	50	33	46	130	76	24	84	95	44	27	22	41	7	15	45	54	7	35	44	0.826953	0.516268	0.342522	0.467227	1.1945	0.686725	0.235236	0.815343	0.823205	0.39983	0.281686	0.200707	0.384461	0.061019	0.132751	0.428472	0.473949	0.062613	0.328597	0.43709	0.0161016	-1.05884	down
gene-TRPC4	47	51	46	19	36	45	30	30	25	18	67	117	38	121	132	92	115	44	53	27	0.220208	0.247382	0.227808	0.089283	0.151989	0.191027	0.137392	0.132708	0.099538	0.074687	0.37993	0.519319	0.172288	0.541847	0.561701	0.462326	0.508127	0.221968	0.236728	0.125052	0.000165027	1.2686	up
gene-LOC512286	653	785	513	568	443	536	623	519	723	667	1071	2159	1155	833	1118	1176	1105	1033	1167	989	6.31967	7.83049	5.13494	5.55264	3.86813	4.63333	5.93258	4.80256	5.98844	5.8622	10.701	19.0129	10.4661	7.54784	9.67501	10.7115	9.27768	9.46527	10.5801	9.40232	2.92685e-12	1.04465	up
gene-EPHX2	104	132	147	63	327	150	58	49	152	80	260	369	266	149	442	218	191	231	272	211	1.3284	1.75445	1.94548	0.817936	3.8062	1.72302	0.730368	0.596483	1.67741	0.937419	3.45834	4.33902	3.22316	1.78991	5.09582	2.64305	2.12753	2.81627	3.28408	2.66204	0.000540894	1.14419	up
gene-C3H1orf226	981	299	285	117	256	111	293	353	267	201	147	119	93	85	82	193	275	68	133	153	6.02983	1.34108	1.42598	0.556729	1.05716	0.457641	1.9375	2.00021	1.65575	0.796725	0.680249	0.461808	0.612957	0.348667	0.32054	0.825937	1.56415	0.277418	0.579772	0.649575	0.00232088	-1.17736	down
gene-PTPRD	27	48	75	44	81	51	66	110	61	59	133	155	99	134	119	107	165	108	114	92	0.076469	0.139644	0.218548	0.12606	0.207184	0.129238	0.183513	0.300163	0.148201	0.190469	0.392326	0.440345	0.263694	0.357895	0.302385	0.287672	0.408194	0.34951	0.303328	0.257948	6.62614e-08	1.06894	up
gene-PTPRF	525	467	278	110	289	191	224	322	600	171	138	133	49	162	70	176	181	69	128	69	1.91725	1.74816	1.04158	0.402655	0.94582	0.618995	0.800768	1.11705	1.86346	0.564196	0.515098	0.438322	0.165417	0.546123	0.225243	0.599913	0.568651	0.236163	0.433296	0.24335	2.55753e-05	-1.35057	down
gene-PROX1	83	181	111	270	176	113	608	461	362	275	522	1074	782	587	1175	926	1244	1296	546	1479	0.432059	0.977655	0.60617	0.91151	0.831709	0.527983	2.23434	1.69453	1.03194	1.33196	2.06131	3.48549	2.66822	2.05761	3.98089	3.07252	4.15989	4.75034	2.7011	5.10264	1.05504e-09	1.97146	up
gene-ELOVL7	494	150	333	156	410	201	353	363	464	172	76	241	149	56	95	86	56	121	92	84	3.83664	1.19773	2.67929	1.22094	2.87286	1.39094	2.69775	2.69117	3.0856	1.21396	0.606456	1.69961	1.07881	0.40367	0.660048	0.628592	0.377695	0.8858	0.665779	0.636689	1.26434e-06	-1.46441	down
gene-NR2F1	23	48	37	55	54	37	95	59	54	49	91	170	106	86	72	123	190	97	87	94	0.285926	0.620343	0.486634	0.700833	0.618675	0.414722	1.18233	0.713329	0.58613	0.556698	1.19497	1.96467	1.26127	1.01987	0.813144	1.47147	2.09718	1.15942	1.03394	1.16881	2.85493e-07	1.19635	up
gene-HYOU1	3586	1996	1765	1808	2553	2827	1811	2571	4609	2060	1116	1080	888	1403	1042	1051	1366	1194	1620	1042	21.9951	12.5921	11.2033	11.1868	14.0625	15.3879	10.908	15.0409	24.0974	11.4614	7.03892	6.02703	5.13552	8.06223	5.74418	6.05433	7.22712	6.88879	9.2539	6.33101	2.42564e-09	-1.01872	down
gene-ISYNA1	445	254	274	314	183	258	197	213	252	460	634	762	852	448	531	1395	752	1009	875	710	6.72682	3.96101	4.28631	4.80054	2.4954	3.47806	2.9335	3.08216	3.26417	6.31917	9.90413	10.483	12.0767	6.34426	7.18105	19.8624	9.87309	14.462	12.4019	10.5564	1.26848e-11	1.56119	up
gene-LOC100300896	243	216	242	386	198	373	340	266	506	441	835	875	697	347	480	311	1151	456	337	737	2.54869	1.79314	2.35148	3.8944	1.71424	3.25143	2.84762	2.71649	4.67856	4.03112	8.41437	7.66215	6.8385	3.37148	4.13505	2.79239	10.1453	3.89258	3.07446	7.19273	7.25856e-05	1.04237	up
gene-ASB5	130789	95211	121668	81335	231756	134220	80735	136931	140791	89323	58788	34435	61432	61404	68875	50697	36435	39001	51955	41759	1253.36	940.643	1206.55	788.004	2004.95	1149.25	761.884	1254.46	1154.5	777.566	581.663	300.204	551.287	550.967	590.454	457.138	302.902	353.933	466.62	393.207	2.35291e-08	-1.18401	down
gene-TM4SF18	620	214	132	208	155	102	192	266	384	188	141	108	66	103	119	66	77	105	86	82	14.8813	5.22111	3.35924	4.9377	3.54618	2.17447	4.53815	5.99887	8.00205	4.07155	3.51482	2.3961	1.45187	2.26216	2.54376	1.43947	1.57531	2.38577	1.89571	1.91065	4.63755e-05	-1.27744	down
gene-SERPINE2	6765	3717	2824	1625	3800	3943	2197	3973	5098	3374	1386	1116	823	1126	969	1235	1132	969	1004	1026	89.4676	50.6133	38.6347	21.6944	45.3172	46.5351	28.5772	50.1876	57.6194	40.53	18.941	13.4089	10.17	13.9251	11.447	15.3415	12.9716	12.1472	12.4202	13.3129	3.01085e-17	-1.69212	down
gene-TOB2	5735	6179	13263	9179	8766	10034	8775	13330	10414	10471	3930	5159	4083	2641	3636	4117	6169	4627	5069	4917	36.4238	40.4984	87.1606	58.9267	50.2935	56.9361	54.8851	80.9139	56.6044	60.4057	25.7498	29.7968	24.3068	15.7172	20.6596	24.6378	34.0074	27.8248	30.1693	30.6975	6.84105e-11	-1.0292	down
gene-EID3	482	661	1196	842	1117	786	964	1017	755	936	259	330	276	373	253	345	405	378	497	383	8.96228	12.6744	23.0315	15.8306	18.7558	13.0629	17.6635	18.0877	12.0201	15.8229	4.97058	5.58227	4.79527	6.49757	4.20094	6.031	6.53808	6.64942	8.65804	6.98653	1.69181e-14	-1.23909	down
gene-PLEKHM1	1945	1243	1297	1092	2251	1723	1498	2374	2517	1681	543	552	620	1040	811	653	690	773	739	655	9.60571	6.34019	6.62791	5.44572	10.0524	7.61182	7.47377	11.2143	10.6277	7.53796	2.83745	2.47466	2.86224	4.91067	3.57718	3.02912	2.95488	3.63318	3.41803	3.26503	1.45399e-14	-1.21109	down
NewGene_9657	23	40	20	24	58	40	37	38	55	14	65	152	143	212	149	129	83	56	54	55	0.737811	1.31486	0.640071	0.762896	1.67788	1.13861	1.15672	1.15175	1.50456	0.382925	2.1562	4.43997	4.30172	6.38119	4.27977	3.90029	2.31	1.7028	1.63113	1.71625	9.53385e-08	1.75329	up
NewGene_4813	37	43	80	144	39	129	178	37	144	109	178	201	198	107	176	251	212	453	241	213	0.619391	0.748397	1.38573	2.4615	0.585675	1.94609	2.97059	0.583486	2.07815	1.66628	3.10494	3.09197	3.13466	1.68844	2.66135	3.99233	3.11688	7.2629	3.8165	3.54181	0.000118059	1.33774	up
gene-NRIP2	8	85	45	47	19	18	9	23	58	50	277	408	311	82	225	393	383	717	386	299	0.084302	0.918503	0.484388	0.4928	0.177553	0.164103	0.092439	0.228924	0.515849	0.472957	3.01803	3.91062	3.06725	0.809173	2.1221	3.89362	3.50416	7.15806	3.81543	3.09117	3.82321e-18	3.34492	up
gene-LONRF3	4133	2080	2739	2705	6037	5052	2498	5539	4369	3322	1364	797	1150	2229	1471	1065	1124	690	1268	1183	16.9488	12.737	11.59	16.2759	21.2571	18.4843	10.3623	21.4149	14.8123	12.2939	6.01602	4.04575	4.27482	11.5267	7.42408	5.79488	5.61265	2.84197	7.26088	7.11835	4.59793e-11	-1.52735	down
gene-CYP19A1	82	202	38	93	65	39	42	61	102	39	21	37	36	60	39	2	42	46	32	48	0.43611	1.1122	0.206933	0.500811	0.309419	0.181509	0.217763	0.307431	0.46309	0.184855	0.115596	0.178939	0.177383	0.296439	0.186193	0.009958	0.190528	0.22939	0.155821	0.248481	0.0302388	-1.00214	down
gene-LYPD6	61	12	32	66	20	65	61	32	38	46	105	164	115	189	61	153	84	39	19	43	0.446524	0.089418	0.243015	0.49505	0.126617	0.42746	0.43947	0.221506	0.235665	0.310599	0.805032	1.09267	0.786668	1.31639	0.401839	1.06847	0.530113	0.265548	0.130344	0.309547	0.00501955	1.23523	up
NewGene_7258	31	106	63	70	256	63	76	59	43	101	33	15	38	37	36	21	50	44	85	12	0.391141	1.38735	0.817069	0.899256	2.93631	0.710897	0.943763	0.711508	0.460638	1.16251	0.429733	0.169803	0.44657	0.438477	0.404221	0.241503	0.543014	0.524914	1.00318	0.149497	0.00772252	-1.14994	down
gene-NEURL1B	220	572	743	480	308	344	410	759	880	516	1799	758	888	545	570	1244	1628	1463	1002	987	0.963771	2.58298	3.3672	2.12542	1.21726	1.34659	1.76747	3.17823	3.30112	2.05353	8.14299	3.0221	3.64176	2.23478	2.23298	5.12835	6.18851	6.0715	4.1145	4.25131	2.38048e-05	1.17155	up
gene-FADS2	199	108	139	223	93	181	316	271	279	317	636	395	679	1115	551	1275	835	434	367	363	1.86085	1.03419	1.3451	2.10373	0.777095	1.50992	2.90921	2.41758	2.22815	2.694	6.14261	3.3612	5.94423	9.76636	4.60514	11.2043	6.77427	3.83878	3.21476	3.27846	1.21134e-09	1.74711	up
gene-FADS1	57	50	68	40	54	34	74	56	76	63	156	156	222	375	143	412	242	125	104	90	0.487232	0.435148	0.645517	0.342538	0.457049	0.255821	0.635902	0.459408	0.560041	0.486076	1.37692	1.21583	1.94433	3.30758	1.19338	3.63678	1.97912	1.10221	0.908983	0.825161	1.22058e-11	1.91725	up
gene-CNTF	153	211	81	57	133	87	242	211	116	233	76	44	43	103	53	85	71	62	75	50	1.75511	2.48764	0.952193	0.661229	1.37294	0.887974	2.73223	2.30728	1.1349	2.42739	0.895592	0.452158	0.458114	1.10437	0.541679	0.911137	0.702488	0.670697	0.797652	0.556741	0.000173233	-1.10399	down
gene-AJUBA	61	81	149	141	11	98	99	85	101	108	275	211	200	67	93	233	293	319	203	283	0.829791	1.08854	2.101	2.00256	0.121553	1.18998	1.30255	1.05455	1.15917	1.27903	3.8727	2.62209	2.59264	0.838879	1.14168	2.98162	3.47932	4.12194	2.56232	3.88218	0.000357293	1.30501	up
gene-BMPER	36	16	33	39	58	41	64	109	42	82	108	166	222	176	202	115	220	127	32	117	0.29682	0.133741	0.2767	0.318467	0.428398	0.295641	0.51528	0.857585	0.295482	0.613993	0.915918	1.24173	1.71669	1.362	1.49228	0.893468	1.57571	0.986611	0.245278	0.945883	2.05327e-06	1.60999	up
gene-LIF	4	13	9	25	54	13	45	17	19	7	29	99	58	35	46	71	41	73	62	40	0.029664	0.098366	0.062373	0.352747	0.361164	0.150203	0.323535	0.119763	0.121295	0.040691	0.223339	0.761998	0.400989	0.238609	0.305138	0.524906	0.262786	0.509327	0.427656	0.292112	0.000490051	1.50337	up
gene-NPR1	642	380	547	742	237	597	607	418	667	604	1233	1118	838	650	860	1375	1225	1259	1126	923	4.64787	2.83801	4.10022	5.436	1.54658	3.86036	4.33075	2.89328	4.1315	3.97464	9.22206	7.3708	5.68384	4.40992	5.57552	9.37269	7.698	8.63715	7.64807	6.56853	2.58504e-07	1.04369	up
gene-THBS2	338	2602	242	126	1944	457	667	604	1400	191	178	217	132	234	219	194	285	171	116	45	2.22144	17.637	1.6457	0.834728	11.5343	2.68337	4.31395	3.79662	7.87181	1.13774	1.20712	1.29301	0.809501	1.44003	1.28674	1.19825	1.62384	1.06035	0.709465	0.287294	4.95754e-05	-2.17632	down
gene-DZANK1	183	540	558	467	719	347	544	582	505	736	184	170	162	111	238	169	158	348	364	187	1.67419	5.26174	5.19493	4.42602	5.9555	2.83855	4.96952	5.01882	4.02171	5.94196	1.75143	1.47381	1.30112	0.906167	1.90459	1.46287	1.29308	2.94547	3.12875	1.59608	2.21049e-06	-1.20941	down
gene-NFASC	39	32	56	50	31	58	75	64	24	35	91	101	147	135	82	78	125	72	102	133	0.102498	0.086805	0.155698	0.135975	0.073255	0.138208	0.197747	0.164557	0.054978	0.085376	0.251665	0.245858	0.370393	0.338273	0.196287	0.196608	0.290015	0.182462	0.25661	0.351011	2.19107e-07	1.28665	up
gene-TET2	406	487	559	423	403	496	782	550	695	576	851	1699	1271	1460	1288	749	1272	1245	940	743	1.14132	1.4121	1.62784	1.20165	1.02362	1.24757	2.16766	1.47998	1.67448	1.47102	2.47223	4.35147	3.35161	3.84823	3.24286	1.98423	3.10625	3.31912	2.47884	2.05393	1.40954e-14	1.18148	up
gene-COX4I2	38	49	92	29	22	19	40	26	66	20	87	185	74	73	116	98	143	131	93	82	1.39397	1.89478	3.67866	1.16835	0.77583	0.619107	1.46163	0.876292	2.09837	0.704811	3.57959	6.48431	2.76169	2.64719	4.00169	3.45749	4.77441	4.61832	3.26658	3.16666	4.82936e-07	1.49913	up
gene-PDGFC	606	995	1154	554	1035	928	695	947	1477	592	483	479	295	423	366	344	478	333	411	340	5.72311	9.46766	10.9539	5.16695	8.46025	7.79164	6.19923	8.37674	11.9803	4.91423	4.70979	3.96306	2.50111	3.58906	2.9862	3.04473	3.75749	2.85939	3.49809	3.01423	4.50315e-11	-1.08351	down
gene-TMEM132E	28	83	23	44	24	14	44	37	54	54	60	90	134	171	63	153	200	87	42	99	0.118397	0.361928	0.100437	0.186191	0.091804	0.052629	0.182248	0.147636	0.19498	0.205575	0.262318	0.34468	0.530325	0.67603	0.238232	0.609263	0.73218	0.348513	0.16439	0.408686	1.19078e-05	1.51359	up
gene-LTBP2	512	2607	549	175	2466	1239	1078	1586	2995	368	200	705	320	362	717	538	642	471	866	441	1.80824	9.76822	1.99386	0.618797	8.06624	4.06542	3.8551	5.50222	9.36476	1.17827	0.720179	2.26169	1.05259	1.19387	2.29452	1.80273	1.95502	1.57133	2.86319	1.51941	0.0091033	-1.26358	down
gene-GATM	26	103	64	69	87	63	166	119	90	108	285	270	181	179	96	151	238	178	204	265	0.292185	1.21511	0.780844	0.830903	0.9311	0.662778	1.92406	1.35832	0.894724	1.1683	3.43668	2.93453	2.02125	1.99714	0.994828	1.64802	2.46474	1.98689	2.28089	3.05862	1.75017e-06	1.29838	up
gene-PLAUR	546	248	152	90	594	231	175	382	532	140	131	79	117	446	222	58	57	63	68	65	11.5353	5.39154	3.32317	1.92379	11.3379	4.36407	3.62674	7.71078	9.6268	2.67396	2.85373	1.51722	2.3086	8.82882	4.1994	1.13817	1.04121	1.24952	1.33821	1.33377	0.0205064	-1.1214	down
gene-SLCO4A1	317	110	97	36	383	149	37	119	452	45	32	12	33	110	41	18	36	14	24	11	2.57953	0.89572	0.794551	0.287641	2.74849	1.05568	0.283677	0.902894	3.14046	0.319623	0.262117	0.081704	0.244197	0.819983	0.28631	0.134332	0.245763	0.104463	0.175358	0.085897	1.7656e-05	-2.27806	down
gene-GPR183	35	515	184	19	831	54	113	85	58	104	23	109	29	70	38	29	37	26	53	25	0.638638	9.81691	3.53168	0.34857	13.8043	0.88001	2.03437	1.50411	0.898019	1.7455	0.421046	1.8063	0.488272	1.17013	0.612481	0.494031	0.580059	0.438098	0.906884	0.438413	0.00115348	-2.14008	down
gene-PDK4	131136	42735	63205	88845	90992	103110	79460	70099	101105	68788	47103	69211	35892	21162	52164	30006	35858	27153	35389	12167	960.384	322.654	479.003	657.812	601.581	674.718	573.051	490.779	633.595	457.619	356.172	461.122	246.149	145.111	341.76	206.771	227.819	188.315	242.897	87.5488	1.76169e-05	-1.12629	down
gene-LPIN2	371	1824	981	186	1993	642	784	583	858	524	289	305	211	190	309	261	338	364	314	262	1.76606	9.17488	4.95514	0.962255	9.09371	2.81663	3.79567	2.78465	3.49829	2.32457	1.41694	1.31962	0.938161	0.84479	1.3365	1.20148	1.39791	1.63785	1.40066	1.22211	2.60931e-06	-1.53116	down
gene-ADM	5332	3253	3815	1165	3989	2879	1059	5780	6804	1717	973	1509	1453	1505	1479	2143	916	842	1334	915	94.2083	58.582	67.9876	20.6327	64.3507	44.3822	18.0506	95.9074	101.91	27.7468	17.1619	23.6062	23.9581	24.416	23.0723	34.3783	13.5618	13.1364	21.6962	14.9723	1.6678e-05	-1.33746	down
gene-KCP	41	25	106	33	25	28	20	66	42	45	123	280	117	55	69	147	256	204	176	108	0.208609	0.092821	0.395068	0.118513	0.077651	0.089483	0.06809	0.222402	0.130291	0.147007	0.46016	1.10136	0.397878	0.188315	0.231417	0.500031	0.889055	0.822551	0.680305	0.399674	2.30933e-08	1.88512	up
gene-LOC511229	78	60	90	106	54	96	176	90	68	94	254	277	122	115	109	161	265	168	163	178	0.63454	0.50892	0.765822	0.882192	0.39883	0.701835	1.42551	0.706748	0.472417	0.697057	2.15356	2.07008	0.937139	0.879943	0.800526	1.2456	1.89194	1.31051	1.2563	1.43528	2.39578e-05	1.0613	up
gene-SLC26A2	147	531	237	131	407	180	231	212	362	88	53	109	51	80	82	78	123	76	90	67	0.516435	2.17186	1.03871	0.462517	1.49857	0.572392	1.06359	0.739862	1.09221	0.326734	0.191518	0.347677	0.168673	0.260522	0.255687	0.256842	0.375131	0.251758	0.349198	0.246732	2.8011e-08	-1.57003	down
gene-CEBPD	16785	5999	4480	2619	5901	4109	4441	7084	8572	3581	1475	3508	1505	1933	3310	1713	1961	948	2402	1025	291.24	107.311	80.4401	45.9355	92.4217	63.6964	75.8742	117.495	127.259	56.4318	26.4122	55.3651	24.4446	31.3896	51.3746	27.9631	29.5141	15.5757	39.0531	17.4736	2.15223e-07	-1.62198	down
gene-ARRDC2	10126	2023	3544	2474	1901	3270	2225	6557	4054	3401	640	824	817	902	1388	1350	1090	563	1382	945	116.065	23.8695	42.0129	28.6628	19.6449	33.4726	25.0992	71.819	39.7571	35.3894	7.5543	8.56442	8.73123	9.65404	14.2104	14.5413	10.8162	6.08164	14.825	10.6344	7.36298e-11	-1.91954	down
gene-ARRDC4	319	257	259	176	221	375	296	272	272	268	443	421	723	483	968	471	486	337	1151	368	3.46503	2.87883	2.90993	1.92789	2.17136	3.64773	3.16626	2.82827	2.52626	2.64299	4.97312	4.16389	7.36705	4.9208	9.4245	4.81877	4.59011	3.47263	11.7406	3.93072	4.74648e-07	1.20425	up
gene-REEP2	67	54	93	65	31	32	38	43	40	78	196	271	215	71	187	182	102	205	217	163	0.894794	0.728959	1.20173	0.812908	0.270997	0.252962	0.325793	0.362077	0.298133	0.63712	2.76064	3.23056	2.69601	0.863766	2.28777	2.22678	0.781882	2.44824	2.78629	2.14353	6.52994e-11	1.82201	up
gene-FCGR2B	21	9	4	13	20	20	77	20	30	17	62	95	54	67	143	92	54	45	43	11	0.369368	0.148949	0.068627	0.221614	0.286857	0.304214	1.38199	0.333411	0.44982	0.271643	1.1199	1.53352	0.891949	1.11988	2.39846	1.58127	0.845076	0.758668	0.7101	0.19002	0.000645114	1.62494	up
gene-MYH6	7485	24412	15049	9854	33018	8669	10773	13185	26058	10199	26174	14854	19362	5728	59543	25223	29650	74181	30734	42584	34.5449	116.163	71.8774	45.98	137.578	35.7525	48.9656	58.1782	102.917	42.7606	124.733	62.37	83.6891	24.7533	245.864	109.548	118.725	324.246	132.951	193.131	0.0110576	1.1636	up
gene-LOC515089	176	286	472	319	474	278	317	504	335	410	83	175	109	133	212	73	157	145	164	94	1.24552	2.07713	3.50055	2.30914	3.01977	1.75117	2.21174	3.39924	2.02225	2.62912	0.600553	1.12489	0.718233	0.880037	1.3592	0.479151	0.964328	0.965405	1.08568	0.647235	2.02189e-10	-1.3305	down
NewGene_10714	594	1432	1676	327	441	862	334	1830	857	309	236	361	488	522	359	406	332	212	398	447	7.38001	18.3508	21.5635	4.10274	4.9439	9.57278	4.08891	21.759	9.11864	3.4887	3.01976	4.07524	5.67381	6.06861	3.98907	4.75119	3.58083	2.49452	4.63586	5.45124	0.0020829	-1.09674	down
gene-SERINC4	56	172	192	122	72	129	113	127	134	167	69	41	27	38	33	36	92	126	36	60	0.73052	2.32334	2.61107	1.61766	0.846052	1.50417	1.46163	1.58846	1.50657	1.99089	0.935266	0.484189	0.321801	0.463405	0.380192	0.443141	1.04341	1.56471	0.43609	0.767471	0.000470906	-1.12244	down
gene-ARMCX4	45	52	74	85	16	22	74	52	21	75	125	118	88	48	85	121	193	125	61	108	0.138307	0.164876	0.239233	0.265418	0.044941	0.060672	0.22935	0.154641	0.055841	0.211216	0.401261	0.333527	0.255208	0.140091	0.235066	0.353368	0.522801	0.367479	0.178444	0.329286	0.00195027	1.10833	up
gene-IRF1	550	678	697	730	642	605	544	496	613	589	893	2105	1023	1198	1338	1293	1180	1050	1111	971	5.09439	6.4436	6.64888	6.79665	5.36903	4.97942	4.9669	4.41142	4.83195	4.93633	8.54515	17.6695	8.86117	10.3533	11.0676	11.2399	9.44392	9.21024	9.63594	8.79325	5.0607e-15	1.05038	up
gene-KLHL30	15766	4794	9287	4527	5112	10976	4862	14276	15084	6984	3454	2596	2132	12486	2350	4904	2626	1684	4343	1665	68.9315	21.6045	42.0172	20.0092	20.1742	42.8785	20.9325	59.6674	56.4292	27.7357	15.5893	10.3251	8.72651	51.1125	9.18909	20.1743	9.95667	6.96979	17.7929	7.15137	0.00931322	-1.15639	down
NewGene_11764	21	13	36	0	16	21	38	9	25	14	61	78	61	23	77	38	58	45	61	49	0.763407	0.243489	0.659723	0	0.363374	0.302265	0.76595	0.107705	0.314975	0.245293	1.40929	1.34062	1.50867	0.592915	1.95365	0.911116	0.948179	0.713796	1.60085	1.29762	8.07238e-05	1.6111	up
gene-SETBP1	309	218	213	218	187	320	286	209	227	242	345	727	764	1223	636	615	821	478	582	470	0.862911	0.63062	0.614727	0.61671	0.471733	0.799386	0.786875	0.558511	0.54226	0.615302	0.995582	1.85036	2.00253	3.20408	1.59245	1.6182	1.99362	1.28182	1.52717	1.30784	7.65377e-16	1.52402	up
gene-ARHGAP22	70	125	127	82	106	162	150	183	103	220	237	369	267	463	143	232	445	230	138	154	0.634751	1.17326	1.19699	0.751997	0.867685	1.37053	1.38996	1.65882	0.823485	1.86807	2.34836	3.20377	2.37004	4.12178	1.22168	2.09186	3.68283	2.04617	1.21742	1.44176	3.78566e-05	1.08458	up
gene-ARHGAP20	22	19	11	17	26	41	44	45	27	5	105	61	35	54	41	72	102	52	57	44	0.078148	0.068813	0.041468	0.061127	0.084359	0.131925	0.15763	0.153889	0.083755	0.016021	0.392899	0.202603	0.119193	0.180253	0.13372	0.247123	0.321039	0.176628	0.192417	0.154819	0.000120723	1.37268	up
gene-NDUFA4L2	22	103	55	42	23	36	18	34	72	66	173	185	65	21	99	134	110	151	138	136	0.608113	2.9469	1.5727	1.15424	0.561337	0.889173	0.487402	0.887586	1.70794	1.66242	4.95727	4.65211	1.67191	0.53497	2.43467	3.48525	2.64354	3.95139	3.57518	3.6975	0.000156477	1.46051	up
gene-FTL	13338	30911	15074	10175	37723	16399	14066	12917	18546	12569	6295	5198	5527	5761	9117	7209	7504	7356	10582	8690	394.377	942.237	461.209	304.143	1006.91	433.23	409.545	365.106	469.229	337.581	192.177	139.819	153.028	159.487	241.137	200.57	192.487	205.957	293.235	252.456	4.08982e-07	-1.21462	down
gene-SNED1	1305	1176	1619	785	1362	1078	1161	1817	1811	974	167	294	202	425	211	252	255	296	230	219	6.07215	5.64091	7.80662	3.67947	5.66073	4.4294	5.23219	8.06637	7.25641	4.14086	0.769396	1.21245	0.845975	1.79703	0.844421	1.06747	0.997872	1.28616	0.967713	0.97238	3.61306e-47	-2.26807	down
gene-LOC104969641	45	49	12	36	36	24	16	33	3	17	24	41	62	70	70	43	71	97	109	71	1.31417	1.47062	0.336875	1.0498	0.944511	0.612504	0.436989	0.909568	0.074732	0.453135	0.713668	1.08854	1.68652	1.91103	1.8306	1.17234	1.8107	2.70041	2.9913	2.05452	0.00143805	1.3305	up
NewGene_15059	116	12	80	128	17	201	36	90	82	131	14	16	30	96	10	8	51	7	4	14	1.21033	0.11937	0.858028	1.34747	0.152252	1.87914	0.370604	1.15566	0.727968	1.26563	0.150122	0.14892	0.291604	0.939319	0.090713	0.07708	0.460381	0.06944	0.033641	0.136141	0.00334511	-1.78499	down
gene-PDE3A	136	173	254	276	168	189	230	205	128	177	301	524	383	422	370	360	565	333	288	295	0.476338	0.627277	0.924282	0.981555	0.531845	0.592547	0.797725	0.687616	0.382989	0.563742	1.09286	1.67682	1.26302	1.39157	1.16426	1.19271	1.72497	1.10907	0.948313	1.01988	1.24735e-09	1.04585	up
NewGene_7318	168	681	430	418	341	345	472	155	621	290	98	110	11	69	185	44	381	125	132	85	0.550887	2.31075	1.46489	1.39	1.01258	1.01473	1.53138	0.486886	1.75014	0.865356	0.33027	0.32941	0.031717	0.211126	0.54457	0.136154	1.08676	0.389385	0.4054	0.273736	9.23411e-05	-1.62804	down
gene-ZNF696	494	1383	928	573	1154	489	823	1016	826	717	181	286	230	217	362	274	398	464	441	323	4.95309	14.3096	9.64168	5.81261	10.4582	4.38105	8.12871	9.75195	7.09603	6.53828	1.87549	2.60787	2.16233	2.03441	3.2502	2.58868	3.46048	4.40832	4.14604	3.17808	7.24759e-10	-1.32335	down
gene-ZNF346	61	39	53	46	42	58	53	82	27	98	66	145	132	108	100	87	131	139	79	123	0.706829	0.468253	0.627357	0.541505	0.443754	0.603291	0.620336	0.913167	0.267388	1.0563	0.79293	1.55572	1.44949	1.19373	1.04654	1.05779	1.3506	1.54885	0.862755	1.41518	6.54537e-06	1.06575	up
gene-CRISPLD1	28	52	49	50	14	25	62	59	65	21	106	64	61	28	45	69	147	153	74	62	0.260644	0.501048	0.477587	0.47384	0.118622	0.210267	0.573689	0.535221	0.529179	0.176594	1.0358	0.552737	0.535387	0.247316	0.378874	0.614835	1.21196	1.37322	0.659804	0.57455	0.00609354	1.01076	up
gene-ZFAND2A	635	165	184	137	151	166	108	104	187	181	76	79	74	104	84	82	130	65	163	38	10.1231	2.85895	2.86669	1.99694	2.03643	2.30815	1.57186	1.48987	2.53415	2.43286	1.15755	1.02707	0.974963	1.65321	1.25912	1.13467	1.69633	0.94536	2.29633	0.618106	0.00164226	-1.1305	down
gene-FNIP2	17082	4905	7400	2433	14498	10375	4583	14921	11168	4371	1410	995	969	7005	2831	1159	1324	1373	915	751	66.1869	19.2157	29.2462	9.28831	49.4278	35.8167	17.3172	55.4403	36.3591	15.2398	5.81109	3.55357	3.63768	24.844	9.81546	4.1398	4.62561	4.97881	3.43625	2.9597	6.87251e-06	-2.19379	down
gene-VTCN1	353	270	243	76	1331	213	412	444	237	217	101	87	141	178	421	86	91	206	179	216	2.84302	2.56913	2.14206	0.677665	10.935	1.75916	3.49989	3.52056	1.66568	1.74189	0.853237	0.700012	1.20894	1.32176	3.33555	0.680915	0.685271	1.68009	1.36377	1.89379	0.0245306	-1.03833	down
NewGene_6452	311	82	89	91	98	104	167	173	54	105	8	10	10	18	6	0	2	2	0	0	2.90137	0.889155	0.928207	1.068	0.908179	0.941362	1.69486	1.47408	0.573389	0.968358	0.071042	0.075273	0.081218	0.144877	0.044898	0	0.015048	0.015386	0	0	2.14672e-16	-4.4367	down
gene-P2RY6	45	23	47	26	22	31	67	64	107	42	69	62	43	96	157	118	79	109	103	76	0.751045	0.209231	0.749205	0.225682	0.172914	0.239178	0.581633	0.774683	0.811707	0.342334	1.0259	0.52031	0.356352	0.789066	1.30372	1.03078	0.871118	0.910853	1.30764	0.69253	0.000840058	1.06636	up
gene-OR51E1	31	4	9	10	8	7	33	56	13	49	72	56	29	103	140	92	94	98	0	188	0.301259	0.039996	0.083918	0.097415	0.063248	0.057297	0.306826	0.516014	0.105267	0.431589	0.717408	0.49452	0.257723	0.93548	1.21062	0.833357	0.785191	0.901548	0	1.79701	0.000912612	2.10859	up
NewGene_4993	761	166	129	76	226	170	120	210	148	163	27	133	76	25	62	64	53	35	68	42	18.2305	3.93652	2.58798	1.49868	4.40532	3.36444	1.85507	4.77471	2.5588	2.78875	0.586449	2.85761	1.25467	0.256822	1.08993	1.02016	0.713446	0.448343	1.38311	0.463323	5.17336e-06	-1.8528	down
gene-PAQR9	25	39	70	10	11	11	76	59	45	32	63	54	43	24	122	54	55	141	152	46	0.42625	0.686742	1.24935	0.158777	0.080101	0.158517	0.460922	0.358059	0.671039	0.177175	1.11766	0.29909	0.695689	0.134493	1.89047	0.877472	0.2917	0.868572	0.877801	0.279389	0.0217815	1.10038	up
gene-CPA3	56	37	36	20	62	13	42	53	36	6	57	232	98	191	185	149	92	99	30	65	0.941459	0.644371	0.616534	0.342247	0.950066	0.192604	0.741524	0.857764	0.518152	0.089155	0.992875	3.66965	1.55707	3.17538	2.85631	2.41417	1.4774	1.64265	0.471172	1.08623	1.21078e-05	1.79776	up
gene-PIK3R6	23	56	64	42	64	58	50	52	51	51	118	99	131	78	122	122	123	133	100	169	0.137764	0.353689	0.399874	0.260154	0.354083	0.315038	0.303585	0.302187	0.265881	0.283278	0.748524	0.555147	0.805974	0.447273	0.865371	0.705446	0.651414	0.77575	0.756495	1.38814	1.74847e-11	1.33055	up
NewGene_844	123	220	57	150	62	83	153	225	85	62	56	33	48	70	32	50	34	37	42	55	2.03942	3.85345	0.975977	2.428	0.972587	1.33441	2.6389	3.81046	1.19962	1.04281	0.983963	0.481432	0.908606	1.11412	0.456952	0.755004	0.446306	0.649525	0.619677	0.894562	5.7445e-05	-1.31795	down
gene-DBP	155	225	188	122	152	117	150	215	178	135	277	437	264	319	283	353	478	428	384	319	2.46835	3.70407	3.10407	1.96633	2.192	1.66776	2.36325	3.28534	2.43749	1.95631	4.57147	6.36992	3.95649	4.78545	4.04876	5.30948	6.63667	6.48435	5.75869	5.02139	1.78847e-18	1.18833	up
gene-MSTN	26	3	10	92	0	35	20	16	28	62	137	325	297	475	61	87	254	22	4	204	0.252763	0.020616	0.098569	0.924988	0	0.304939	0.189896	0.143695	0.2318	0.556941	1.41135	2.95301	2.77195	4.44323	0.543894	0.813366	2.20221	0.208306	0.036483	2.00057	0.000969667	2.71877	up
gene-MOGAT1	61	43	56	37	66	47	54	64	118	39	100	117	137	120	145	90	89	171	136	167	0.248332	0.182917	0.235598	0.15292	0.283281	0.170445	0.217796	0.251174	0.416762	0.144632	0.425143	0.460942	0.528989	0.464009	0.53416	0.363963	0.316161	0.665509	0.524979	0.674907	1.75183e-08	1.23983	up
gene-P4HA3	1220	1732	1016	371	1727	741	827	1234	1670	602	159	233	240	181	257	138	200	232	286	236	15.3655	22.4567	13.1438	4.78359	19.7868	8.45439	10.2786	14.9196	18.0995	6.84263	2.02398	2.66172	2.7994	2.10697	2.9531	1.62559	2.15278	2.73003	3.46491	2.88158	1.27363e-21	-2.26288	down
gene-MSS51	1071	3794	1533	1422	2770	2456	1614	1357	1434	2039	2184	3725	4835	2814	5044	3418	3232	4259	6083	4725	7.30068	38.5725	10.0395	8.96031	15.3234	21.3819	9.97057	8.06872	7.9984	11.6111	14.0931	33.2446	44.768	16.3533	44.7629	32.6649	17.1964	24.6996	34.5692	45.2745	4.48202e-06	1.138	up
gene-PRKAG2	3356	2450	5673	2899	4234	4080	4369	7380	3481	3300	964	1014	1170	4790	1293	1588	1345	1600	1005	1018	39.3419	28.4933	68.02	34.4955	43.8461	42.8396	47.0137	80.0147	34.8807	35.1116	11.8352	10.8987	10.6054	45.7264	12.9203	16.0705	12.2908	16.9893	9.56011	10.8145	1.1935e-05	-1.29162	down
gene-IKZF2	67	47	56	140	69	107	186	78	60	164	169	429	192	345	114	109	189	178	152	149	0.19193	0.137646	0.164022	0.41172	0.178523	0.277305	0.525064	0.211889	0.145944	0.434191	0.510561	1.14373	0.528346	0.94259	0.294763	0.297097	0.479907	0.493528	0.412881	0.419832	0.000752897	1.1136	up
gene-APH1B	75	117	150	20	163	100	26	156	219	24	209	364	306	110	271	232	189	146	214	163	0.527459	0.856607	1.11551	0.377477	1.01461	0.677332	0.472692	1.0972	1.32086	0.396317	1.49574	2.49887	1.99419	0.775559	1.84523	1.53154	1.14491	1.00597	1.75236	1.13526	0.00344238	1.19084	up
gene-MYBPHL	14	22	20	56	12	16	17	35	58	61	55	85	65	31	80	83	120	80	50	51	0.324193	0.525072	0.475725	1.28677	0.248047	0.331096	0.367948	0.76729	1.14141	1.25552	1.30869	1.78688	1.40419	0.663689	1.63511	1.79181	2.39371	1.72411	1.06822	1.1359	0.000555704	1.24981	up
gene-EMILIN3	50	77	146	131	91	163	127	113	166	117	562	612	713	366	492	401	340	385	553	352	0.368419	0.594938	1.13063	0.991274	0.615701	1.08968	0.936277	0.808278	1.06478	0.794411	4.35434	4.17286	5.00476	2.57004	3.29864	2.83054	2.20869	2.73382	3.88436	2.59164	3.5368e-24	2.1256	up
gene-LNX1	511	238	786	273	340	293	133	559	210	279	46	144	95	52	80	253	209	46	142	237	4.51345	2.35347	7.20091	2.39282	2.75876	2.27638	1.21598	4.62818	1.52999	2.24911	0.452728	1.13893	0.743869	0.405859	0.607678	2.18625	1.70131	0.367253	1.14526	2.02565	0.000374916	-1.40697	down
gene-C3AR1	22	39	12	41	47	86	213	106	48	29	134	202	68	110	170	179	119	128	58	63	0.175348	0.315001	0.094883	0.330834	0.33714	0.611241	1.68253	0.806507	0.32465	0.20448	1.10468	1.46916	0.51001	0.826183	1.2165	1.3509	0.825688	0.97075	0.430616	0.491147	0.0275113	1.02969	up
gene-RAMP3	228	462	191	465	198	188	193	740	223	805	68	181	155	122	111	235	225	169	106	139	4.39241	9.18375	3.80236	9.06517	3.42993	3.22489	3.6651	13.6273	3.67728	14.1006	1.35382	3.16991	2.79672	2.19434	1.90352	4.25984	3.74784	3.08624	1.91307	2.63121	0.000291746	-1.21864	down
gene-RIPOR2	225	186	335	120	190	202	253	203	189	204	424	820	838	823	1044	375	777	526	638	641	1.2458	1.05174	1.93273	0.666882	1.07841	1.16549	1.35947	1.10867	0.872708	1.0248	2.96004	4.4375	4.42455	5.402	6.4391	2.54251	4.73163	3.43126	4.35629	4.43677	1.53518e-20	1.79376	up
gene-FGF10	138	175	194	161	164	90	157	330	145	126	58	40	115	127	59	18	97	66	22	44	1.12421	1.47512	1.64	1.3285	1.20581	0.656751	1.25756	2.57275	1.00844	0.930781	0.484303	0.291163	0.874971	0.965336	0.430352	0.135544	0.681501	0.509666	0.164232	0.346406	0.000207415	-1.2879	down
gene-SLC5A6	1733	1563	2478	1085	1994	1925	1319	1827	2248	985	382	317	390	594	447	434	538	494	557	322	15.4262	14.3332	22.8925	9.64845	16.0032	15.3324	11.548	15.4908	17.2761	8.03382	3.47713	2.55418	3.24881	4.92858	3.52876	3.60256	4.13578	4.13686	4.63153	2.78597	1.30322e-28	-1.84807	down
gene-ODF2L	142	158	206	186	304	212	245	234	202	264	36	212	81	112	32	62	113	136	62	41	2.07264	2.37693	3.11773	2.75838	4.02531	2.77101	3.52847	3.27271	2.52817	3.51966	0.539871	2.82171	1.10771	1.53109	0.408399	0.848717	1.43692	1.88082	0.850009	0.584656	2.46423e-05	-1.23344	down
gene-SLC6A6	852	205	638	253	745	278	716	1693	499	495	150	211	121	196	129	234	185	268	289	179	3.99403	0.969632	3.14968	1.17651	3.24327	1.14225	3.37302	7.684	2.04267	2.10621	0.709328	0.884295	0.521959	0.843892	0.528107	1.01079	0.738261	1.16019	1.24515	0.80898	4.60709e-07	-1.6039	down
gene-ATF3	4557	1230	1384	1831	4314	4338	932	2282	3929	945	7905	5203	7858	10616	4085	5441	1601	750	9788	931	62.8921	17.5623	19.8268	25.6178	53.7569	53.5297	12.7143	30.1994	46.5863	11.8756	112.591	65.2454	101.216	137.384	49.6823	70.9311	19.1941	9.82269	127.063	12.6574	0.0426806	1.18907	up
gene-CRYL1	3155	1297	2431	1367	1697	2782	1497	3514	2386	2405	851	907	945	2164	1040	994	907	972	828	718	60.2814	25.288	47.1715	26.4205	29.23	47.3166	27.4516	64.2918	39.069	41.7664	16.7736	15.7599	16.6366	37.8409	17.7734	17.2686	14.7606	17.6134	14.8155	13.486	7.77383e-06	-1.03066	down
gene-MT2A	5808	3149	4864	845	4374	1873	847	1860	5002	796	286	245	327	667	316	569	343	168	181	212	382.717	213.894	331.637	56.2889	260.19	110.226	54.9222	117.145	282.004	47.6007	19.4048	14.665	20.12	41.1341	18.6223	35.2351	19.5975	10.4696	11.1426	13.7102	2.44833e-13	-3.05564	down
gene-WDR90	226	292	182	173	206	146	190	221	376	233	61	107	106	75	62	68	167	125	95	83	1.02178	1.36096	0.848597	0.784354	0.837353	0.586895	0.840436	0.949006	1.52511	0.95499	0.277391	0.437401	0.446131	0.313049	0.249696	0.286833	0.649349	0.530728	0.396737	0.363785	1.31631e-09	-1.16471	down
gene-GPD2	499	180	487	1141	247	804	593	467	398	591	1048	1528	1962	3150	916	1340	1023	602	325	647	1.59613	0.473082	1.45578	3.85211	0.56818	2.21151	1.76508	1.38092	0.868892	1.78341	3.53249	4.3035	5.27704	8.51887	2.58064	3.94581	2.94313	1.74461	0.849776	1.63973	0.00395378	1.28183	up
NewGene_12195	10774	5685	7869	6742	15053	4129	23622	9280	6646	13328	10186	28110	14775	15889	27452	18293	34186	11364	28378	15631	25.748	13.9419	19.3698	16.2146	32.3259	8.77549	55.4451	21.1035	13.528	28.8003	25.1111	60.8343	32.9134	35.3908	58.421	40.9454	70.5501	25.5995	63.2676	36.5349	0.000590285	1.0418	up
gene-CACNB2	12	39	33	37	27	22	23	34	53	31	63	118	34	69	55	80	157	87	66	68	0.102054	0.323648	0.277427	0.302379	0.194394	0.157311	0.185504	0.266429	0.40393	0.224226	0.530883	0.951857	0.255546	0.577016	0.438777	0.671013	1.19077	0.717642	0.544839	0.577163	9.15969e-08	1.4215	up
gene-SLC8A1	75	199	185	197	111	82	120	181	145	100	220	584	226	153	221	252	418	344	247	247	0.333059	0.913609	0.847775	0.889324	0.446679	0.324684	0.524221	0.763228	0.550402	0.404827	1.01752	2.38631	0.938514	0.640042	0.88023	1.06216	1.62609	1.47662	1.03411	1.08356	9.26032e-06	1.11229	up
gene-DKK1	646	141	336	211	72	362	114	210	371	214	40	268	41	97	141	53	67	71	31	25	18.7183	4.21564	10.0569	6.18711	1.87777	9.37805	3.25302	5.80739	9.18946	5.61953	1.18005	7.0537	1.10205	2.61963	3.6453	1.42038	1.68268	1.94871	0.8307	0.705597	0.00021693	-1.65642	down
gene-STXBP6	217	183	310	360	253	171	256	274	212	280	671	1005	530	313	420	698	772	566	368	420	1.56505	1.41067	2.27211	2.46953	1.57265	1.03582	1.82898	1.76818	1.24921	1.75379	4.7897	6.50594	3.60888	2.2514	2.59505	4.53165	4.58184	3.85892	2.38013	2.86562	2.07289e-09	1.25854	up
gene-CDRT1	145	185	43	18	144	107	76	34	218	20	14	26	28	37	43	16	55	37	87	21	0.974056	1.27641	0.297007	0.128237	0.869443	0.634693	0.597478	0.212742	1.26998	0.121437	0.095945	0.156592	0.173534	0.227768	0.315122	0.098446	0.315378	0.237705	0.538755	0.179678	0.00590046	-1.36355	down
gene-MYMK	81	399	234	48	55	167	133	143	281	129	99	46	48	52	62	58	71	85	112	42	0.514943	2.39759	1.14338	0.251413	0.280109	0.781212	0.680678	0.720161	1.08443	0.732697	0.859931	0.253784	0.299015	0.305069	0.343584	0.328748	0.397151	0.54256	0.6441	0.269645	0.00139226	-1.19548	down
gene-ALOX5	17	24	24	20	39	25	76	21	44	17	53	92	47	141	108	127	73	47	34	29	0.17674	0.256578	0.254863	0.210479	0.367993	0.229	0.775547	0.206752	0.388383	0.158768	0.570492	0.870136	0.461266	1.38309	1.01357	1.24938	0.663321	0.459373	0.326362	0.295485	0.000268822	1.38154	up
gene-PLAC8	42	89	71	84	70	81	82	49	57	76	67	175	170	94	120	140	162	85	245	259	1.49125	3.28662	2.57636	3.0655	2.07073	2.40894	2.70194	1.50776	1.75257	2.47855	2.456	4.8889	5.72169	3.11771	3.43979	4.70622	4.51541	2.79053	8.19527	9.14945	9.51254e-06	1.19458	up
gene-PDXK	1484	2248	1883	1438	821	1236	1529	2301	1744	1244	634	584	601	916	478	486	726	634	741	411	8.12136	12.0531	9.73499	7.58148	3.8382	5.6692	7.29356	10.8914	7.52991	6.45571	3.49278	2.94852	3.03514	4.61743	2.22672	2.25784	3.22253	3.38252	3.47692	2.01697	2.66115e-12	-1.27458	down
gene-TP63	113	199	293	424	640	420	475	324	527	502	858	592	781	675	764	1078	1069	733	1247	1179	0.901507	1.59969	2.26724	3.86068	4.65766	3.22	3.90849	2.63376	4.03244	3.87089	7.14036	4.53725	5.91638	5.24436	5.84226	8.68707	7.725	5.72903	9.62033	9.83839	2.64129e-07	1.30741	up
gene-DDX25	67	0	100	120	10	176	93	100	112	79	33	16	24	75	46	18	41	21	4	48	1.0972	0	1.69303	1.93257	0.121016	2.59319	1.49846	1.55041	1.51299	1.16351	0.482911	0.198928	0.300638	1.14706	0.557113	0.226631	0.487061	0.308449	0.038829	0.763256	0.0483462	-1.28946	down
gene-KCNK12	316	223	56	32	231	98	82	194	352	36	73	72	24	73	44	68	199	55	109	25	5.20203	3.78628	0.942702	0.525141	3.42865	1.43076	1.31818	3.05647	4.96493	0.534372	1.22883	1.07304	0.358634	1.1148	0.646954	1.05129	2.84614	0.852591	1.67055	0.399751	0.0324426	-1.06873	down
gene-KY	797	96	315	551	147	155	124	305	167	397	625	927	929	1263	476	337	1109	437	456	1005	3.87315	0.479667	1.5836	2.7066	0.64289	0.672587	0.593076	1.4179	0.692406	1.75313	3.13716	4.09955	4.22853	5.74888	2.06839	1.54236	4.67835	2.01301	2.07542	4.79946	0.000885238	1.34835	up
gene-LOC781977	202	216	141	182	181	118	473	160	111	158	923	591	301	845	591	651	1068	446	361	282	2.98451	3.16904	2.08463	2.53702	2.34769	1.42782	6.86667	2.13224	1.3615	2.09104	14.1167	8.03791	3.91552	11.1321	7.46538	8.7291	12.9849	6.01818	4.63819	3.97901	9.48495e-09	1.70499	up
gene-FAM124B	33	38	42	47	7	32	32	33	41	12	127	82	20	35	115	170	162	124	67	119	0.234596	0.286303	0.310444	0.343631	0.046231	0.205691	0.225637	0.226601	0.255746	0.078419	0.956131	0.541851	0.132907	0.239204	0.747715	1.16879	1.02423	0.853718	0.455815	0.848859	8.84457e-06	1.76324	up
gene-ANGPT1	89	48	23	35	53	68	82	126	76	89	28	282	137	189	151	47	165	257	77	105	1.12441	0.619069	0.296517	0.4411	0.605201	0.764087	1.01832	1.51193	0.815303	1.01588	0.359932	3.23972	1.62268	2.23623	1.70151	0.55547	1.80891	3.06799	0.912527	1.29797	0.00386344	1.1258	up
NewGene_11525	156	154	66	25	70	70	93	135	111	58	26	14	57	13	44	3	39	8	23	15	1.55819	1.87691	0.628245	0.247059	0.730593	0.853732	0.987292	1.35599	1.20911	0.548641	0.302169	0.116073	0.604516	0.127955	0.448483	0.028371	0.420114	0.067292	0.20611	0.270093	4.24668e-05	-1.85198	down
gene-SDF2L1	260	246	207	151	192	311	161	267	478	218	134	116	59	118	86	106	119	120	148	82	8.32698	8.12607	6.85553	4.89641	5.53678	8.91264	5.07682	8.17039	13.1154	6.34519	4.44053	3.37458	1.76647	3.53394	2.4439	3.20054	3.31251	3.63598	4.43351	2.5646	9.53176e-08	-1.0907	down
gene-EDN1	685	1016	606	272	472	221	210	370	619	145	121	247	66	147	94	142	210	131	119	158	9.37351	14.3286	8.56946	3.75209	5.82078	2.6983	2.82349	4.82939	7.24611	1.79581	1.70066	3.06859	0.840308	1.8713	1.15076	1.82052	2.49342	1.69143	1.51591	2.11575	5.91021e-07	-1.6308	down
gene-B3GALT1	79	22	124	210	63	149	331	138	83	210	263	740	535	827	644	338	723	553	552	573	0.392573	0.112291	0.633964	1.05133	0.279101	0.658128	1.61266	0.65476	0.352167	0.96078	1.34914	3.34256	2.48869	3.84686	2.86006	1.58662	3.11486	2.60614	2.56962	2.79509	8.78174e-10	2.09104	up
gene-C18H19orf48	888	405	316	121	336	172	190	287	745	141	206	207	105	193	88	164	230	177	171	114	13.8085	6.4962	5.08799	1.8987	4.7078	2.38617	2.90931	4.26677	9.92027	1.98635	3.29681	2.92355	1.51614	2.81141	1.22132	2.39707	3.10072	2.59689	2.49279	1.73135	0.0041177	-1.04109	down
gene-SYNDIG1	348	1099	160	37	1000	126	558	130	252	33	0	18	25	60	76	44	34	20	71	28	4.4812	14.6117	2.13244	0.482068	11.6334	1.41716	7.07716	1.60012	2.78033	0.380736	0	0.206381	0.288508	0.721632	0.869441	0.528682	0.365177	0.234942	0.841692	0.345719	9.51254e-06	-3.24419	down
gene-BREH1	126	234	241	262	223	221	184	280	432	322	608	1041	371	337	466	296	632	484	460	372	1.84913	3.68412	3.74508	3.97557	2.95008	2.94729	2.81456	4.11887	5.70715	4.21339	9.2349	14.3935	5.19855	4.67099	6.34512	4.16902	8.07364	6.90854	6.52919	5.6524	7.38539e-07	1.08834	up
gene-SLFN11	28	25	19	31	45	28	45	63	35	22	109	75	58	72	54	44	116	46	71	64	0.123992	0.112926	0.085105	0.140513	0.180666	0.111937	0.196545	0.266366	0.133013	0.088138	0.503862	0.303524	0.242562	0.30113	0.216303	0.182313	0.448439	0.192155	0.298071	0.280893	2.03838e-05	1.14847	up
NewGene_7944	50	27	57	61	46	31	43	56	55	50	43	98	36	58	118	35	126	111	139	154	0.471741	0.445244	0.639896	0.626923	0.528626	0.353501	0.508781	0.635808	0.517335	0.627459	0.517887	1.19225	0.316012	0.70104	1.23301	0.303049	1.39208	1.2552	1.75441	1.79825	0.00149799	1.01925	up
gene-RCSD1	2082	902	1697	2172	1027	2664	1840	1841	2408	2579	2294	4702	4751	4069	3788	3137	3528	3291	3190	3677	18.1976	7.99726	15.2234	18.9775	8.09949	20.7383	15.7073	15.306	17.684	20.4376	20.6019	37.3386	38.7972	33.2947	29.4827	25.6997	26.5123	27.1035	26.0573	31.2855	2.31281e-07	1.01055	up
gene-PRKG2	18	23	41	64	19	22	32	25	44	17	60	109	51	26	62	79	114	77	70	56	0.105365	0.137845	0.246828	0.377434	0.098237	0.114067	0.183276	0.137807	0.218479	0.088402	0.363006	0.584817	0.280195	0.139714	0.324673	0.437132	0.708538	0.427741	0.383806	0.321273	6.239e-05	1.26091	up
gene-PDPN	295	200	180	75	294	119	193	185	300	144	158	77	72	157	38	165	64	59	32	58	16.1666	11.2736	10.192	4.15038	14.5469	5.83446	10.4137	9.66443	14.0594	7.17567	8.95052	3.79734	3.67737	8.02386	1.85019	8.52368	3.0347	3.04936	1.62832	3.10409	0.00442378	-1.05204	down
NewGene_12226	41	42	41	14	21	53	44	29	19	26	63	59	64	86	85	48	99	88	57	79	0.126718	0.129537	0.253883	0.120393	0.08415	0.193638	0.292621	0.235815	0.041249	0.140339	0.333591	0.178013	0.548373	0.582006	0.546281	0.351973	0.495504	0.455416	0.301463	0.356477	3.11043e-06	1.21927	up

## Sheet: Table S7
Table S7. Statistics of DEGs in L_LL vs. T_LL comparison
#ID	T_10LL Count	T_1LL Count	T_2LL Count	T_3LL Count	T_4LL Count	T_5LL Count	T_6LL Count	T_7LL Count	T_8LL Count	T_9LL Count	L_10LL Count	L_1LL Count	L_2LL Count	L_3LL Count	L_4LL Count	L_5LL Count	L_6LL Count	L_7LL Count	L_8LL Count	L_9LL Count	T_10LL FPKM	T_1LL FPKM	T_2LL FPKM	T_3LL FPKM	T_4LL FPKM	T_5LL FPKM	T_6LL FPKM	T_7LL FPKM	T_8LL FPKM	T_9LL FPKM	L_10LL FPKM	L_1LL FPKM	L_2LL FPKM	L_3LL FPKM	L_4LL FPKM	L_5LL FPKM	L_6LL FPKM	L_7LL FPKM	L_8LL FPKM	L_9LL FPKM	FDR	log2FC	regulated
gene-MARCH3	220	144	378	145	246	435	136	303	297	248	66	174	137	74	138	159	77	111	78	159	3.18194	2.23	5.5595	2.09245	3.37293	6.01114	1.80079	4.18857	4.01076	3.46129	0.863106	2.46492	1.93256	1.11647	1.62337	2.1249	1.15034	1.55631	0.960857	2.35598	0.000175528	-1.026	down
NewGene_14752	49	91	60	51	104	93	168	53	60	158	154	231	247	117	79	167	135	77	251	208	0.927852	1.83902	1.15794	0.966742	1.86178	1.68605	2.92548	0.960806	1.06465	2.88999	2.65783	4.31151	4.60015	2.32847	1.21971	2.94528	2.66415	1.42022	4.0911	4.05023	0.00107632	1.03209	up
gene-FAM83G	10	14	54	18	18	36	55	20	4	34	68	81	52	28	88	59	20	52	45	61	0.04859	0.073743	0.278953	0.08962	0.083441	0.174685	0.259083	0.09438	0.017997	0.167098	0.317182	0.407356	0.260436	0.150488	0.366795	0.278882	0.105932	0.257651	0.199255	0.435009	0.0044433	1.17948	up
gene-TACC1	5846	5787	9939	4941	6409	5072	7366	5973	8023	3740	2236	3583	1565	1755	1895	2023	1615	2443	3330	2316	21.5386	23.6221	37.0952	18.837	22.4838	18.1245	24.9901	21.1899	27.8246	13.2961	7.4957	13.0878	5.60353	7.16677	5.75426	7.00541	6.44203	9.07822	10.9845	8.82868	1.56659e-19	-1.39438	down
gene-ANO5	929	822	1063	1301	977	1060	884	1019	1087	1088	995	2488	2303	1981	1904	2239	2083	2134	2938	2402	6.11574	5.78837	7.12498	8.5496	6.09831	6.66072	5.32657	6.39999	6.68071	6.90654	5.99123	16.0941	14.8442	13.6973	10.2559	13.6763	14.3063	13.648	16.627	16.2223	1.1216e-14	1.15856	up
gene-KBTBD13	69	72	32	49	83	40	42	44	80	34	41	191	187	89	178	110	87	82	59	59	0.737016	0.822978	0.340994	0.513222	0.840454	0.407664	0.404368	0.441149	0.794289	0.345535	0.398399	1.99815	1.95129	0.992268	1.55155	1.08319	0.962538	0.850694	0.535265	0.641041	0.00219354	1.06346	up
gene-C5AR1	131	115	181	46	97	79	223	31	156	26	42	107	26	39	49	69	40	30	84	15	1.26216	1.18689	1.7765	0.441072	0.886383	0.723939	1.96335	0.277466	1.40382	0.234463	0.36894	1.00388	0.240571	0.394437	0.384172	0.61536	0.393176	0.2798	0.695128	0.141442	0.0179216	-1.03666	down
gene-LOC112443130	180	36	101	51	58	76	84	88	56	76	36	21	30	36	63	36	28	26	56	11	2.89665	0.62085	1.65752	0.812447	0.887608	1.15639	1.23761	1.34162	0.835356	1.16999	0.524902	0.3288	0.468881	0.600543	0.831308	0.534054	0.464573	0.402095	0.772954	0.176609	0.000916849	-1.17053	down
gene-CENPT	85	47	79	43	57	81	63	58	96	47	71	99	71	67	97	696	74	69	104	83	0.955152	0.600366	0.881567	0.515331	0.616778	0.866766	0.646428	0.583476	1.01289	0.513558	0.737978	1.11755	0.846892	0.76932	1.00808	8.29565	0.838562	0.727058	0.971171	0.951923	0.00976966	1.24709	up
gene-PPARGC1A	10531	10229	10723	1580	9570	5068	17954	13896	20452	12211	13179	915	628	8810	1969	821	1133	745	1021	753	45.8436	48.055	47.8482	6.68101	38.5416	20.9414	72.1103	57.5178	83.531	51.5356	51.274	3.79374	2.56791	39.9656	6.89867	3.21138	5.00088	3.05421	3.6878	3.24012	0.0137043	-1.72728	down
gene-NOTCH3	312	456	1237	919	444	839	911	735	360	894	1455	2630	896	916	1338	1296	1294	1520	1570	1444	1.02954	1.61349	4.16439	3.03557	1.39213	2.6456	2.75802	2.31993	1.10896	2.85079	4.40412	8.54071	2.89821	3.17982	3.61695	3.97369	4.45917	4.88055	4.46207	4.89412	3.85593e-06	1.09909	up
gene-SLC43A2	4354	10975	13082	10619	11919	24968	17895	15878	11541	14171	5341	9449	5260	6241	4458	7100	6646	2930	9722	5122	15.8629	51.5387	48.553	40.2895	44.775	84.2667	63.4283	56.9008	44.3071	55.3528	21.0024	37.5898	18.6034	26.5007	14.8078	24.0697	25.2227	10.0851	29.4533	20.4123	4.2633e-05	-1.01494	down
NewGene_15187	185	159	217	215	94	226	235	171	228	108	68	70	33	54	57	42	51	93	113	60	6.75694	6.24421	8.08744	7.8589	3.25161	7.88211	7.89589	5.98279	7.81163	3.8056	2.27649	2.50915	1.15941	2.04894	1.70484	1.39532	1.95034	3.31121	3.54528	2.23933	8.87679e-11	-1.45067	down
gene-MLC1	168	205	366	131	216	142	592	205	197	366	25	171	45	35	53	24	12	82	49	181	1.76959	2.3083	3.97186	1.37891	2.17998	1.44298	5.77781	2.074	1.94792	3.76935	0.238517	1.76805	0.459136	0.387877	0.455237	0.226708	0.13093	0.831825	0.437628	1.97242	1.3883e-05	-1.84482	down
gene-PRR33	536	520	415	837	547	903	1169	680	655	773	1130	1639	1391	1381	1823	1348	1101	1168	1507	1412	6.1231	6.36229	4.82587	9.55337	5.92301	9.85124	12.2463	7.41934	6.99094	8.52451	11.8319	18.395	15.5732	16.5776	17.0497	14.2933	13.1229	12.9639	14.8094	16.5419	1.92153e-12	1.08181	up
gene-CDKN1C	303	519	1579	1100	632	819	946	626	507	841	2119	2108	924	928	2747	1628	1751	2255	2500	1420	6.79991	12.4922	36.1704	24.7069	13.473	17.5825	19.4928	13.442	10.648	18.2361	43.6479	46.5604	20.3567	21.9253	50.5585	33.9741	41.0663	49.2591	48.3456	32.7445	7.64348e-08	1.30441	up
NewGene_6228	2070	204	236	222	375	154	340	139	390	460	141	126	99	177	125	96	126	121	128	122	14.7868	1.55544	1.71091	1.57891	2.53707	1.04661	2.2256	0.945409	2.60332	3.17073	0.919557	0.879716	0.69014	1.32265	0.728821	0.635174	0.933118	0.834542	0.782405	0.88881	0.000393875	-1.81306	down
gene-TFCP2L1	14	81	96	6	138	131	158	299	311	630	42	38	34	4	18	43	0	4	18	44	0.042331	0.261788	0.293365	0.017282	0.395455	0.376899	0.436229	0.865623	0.881295	1.84517	0.114927	0.110895	0.10016	0.012395	0.044192	0.120493	0	0.011267	0.046009	0.135549	0.000524129	-2.80868	down
NewGene_8484	15	32	40	41	32	40	33	26	42	16	29	115	61	41	42	74	27	85	61	76	0.35392	0.823602	0.971793	0.985398	0.725605	0.920209	0.723931	0.596557	0.941346	0.35449	0.643965	2.72811	1.4339	1.02573	0.828297	1.64944	0.669726	1.99713	1.27449	1.88389	0.00114662	1.02602	up
gene-LDB2	130	95	156	176	96	103	242	122	82	206	410	567	349	285	424	353	363	321	432	219	1.36627	0.965572	1.61803	1.8019	0.962653	0.987464	2.1945	1.26312	0.823864	2.01344	3.8543	5.68326	3.55279	3.13523	3.50659	3.32598	3.93022	3.2604	3.74201	2.31428	2.82821e-14	1.49393	up
gene-RIMBP2	110	48	48	67	80	48	60	93	95	131	47	30	0	18	21	14	16	71	5	10	0.483188	0.201057	0.189196	0.272613	0.314573	0.18172	0.225682	0.366456	0.354515	0.506519	0.173416	0.117107	0	0.072509	0.067595	0.048611	0.066323	0.28407	0.014719	0.040139	0.00125328	-1.6811	down
gene-ADORA2B	466	415	284	231	433	206	395	168	486	240	212	187	106	158	183	169	122	109	175	119	6.50218	6.50923	4.26455	3.40108	6.02996	2.90206	5.3464	2.35681	6.6788	3.38947	2.85992	2.70197	1.52126	2.44506	2.2008	2.30748	1.87903	1.55872	2.15625	1.784	8.07617e-06	-1.02631	down
gene-LOC786948	61	64	142	29	69	141	295	52	102	70	139	504	269	227	312	216	135	230	734	224	1.53705	1.70622	3.64453	0.728481	1.65288	3.39125	6.82265	1.25184	2.39665	1.69964	3.21377	12.5125	6.64892	6.02065	6.43737	5.04994	3.55372	5.63051	15.9387	5.80453	3.75639e-06	1.63496	up
NewGene_8031	143	34	30	69	53	38	40	41	46	62	77	190	142	87	166	113	114	195	151	166	0.826857	0.181315	0.168711	0.333406	0.266418	0.174559	0.216307	0.208528	0.209233	0.286324	0.339027	1.03853	0.725354	0.478851	0.754276	0.572444	0.594574	1.06894	0.660979	0.888221	7.33642e-06	1.37811	up
gene-SEPT6	136	122	210	170	101	124	181	121	141	221	300	400	222	322	300	256	223	374	371	236	1.10103	1.13737	1.71583	1.40039	0.756115	0.889606	1.16208	1.00735	1.11673	1.80901	2.22049	3.03816	1.6564	2.91748	2.15946	1.99298	1.84475	2.76447	2.36757	1.93406	1.54824e-11	1.06122	up
gene-FSTL3	482	633	500	221	748	386	1320	560	828	474	442	217	157	416	252	182	123	189	226	145	6.54789	9.21523	6.92188	2.98987	9.64268	5.00391	16.4451	7.26034	10.5166	6.2089	5.49931	2.89029	2.08134	5.92736	2.79911	2.28899	1.74193	2.49296	2.63957	2.01273	2.45044e-05	-1.25502	down
gene-ATP1A1	5104	8538	9246	6280	4989	12889	6112	7913	7834	3596	1920	2656	1690	2690	2571	2324	1509	2505	3593	1515	37.3742	66.9515	68.9549	45.9503	34.6613	90.1309	41.0333	55.343	53.596	25.4079	12.8789	19.101	12.1215	20.6882	15.4028	15.792	11.5201	17.8165	22.6212	11.3721	3.52532e-15	-1.59256	down
gene-SLC25A33	1183	1750	1157	564	2106	1116	2831	1762	2687	1959	1393	266	323	1307	492	235	762	184	697	137	20.9032	33.1007	20.8069	9.94615	35.2976	18.8246	45.8578	29.7316	44.3578	33.3909	22.5388	4.61684	5.57334	24.2565	7.10312	3.84852	14.0408	3.14227	10.586	2.47828	0.00681068	-1.39962	down
gene-TBXA2R	44	33	67	47	28	11	34	22	21	15	49	107	39	53	35	64	61	71	109	57	0.468331	0.395001	0.729797	0.524652	0.358054	0.108352	0.325667	0.215785	0.264981	0.193751	0.529701	1.17342	0.42105	0.608726	0.309835	0.698301	0.696779	0.766559	1.07067	0.682159	0.00255687	1.06471	up
gene-ADCY7	79	73	107	151	40	76	230	48	91	55	126	230	142	154	235	224	168	280	270	150	0.337625	0.332751	0.465136	0.657901	0.160882	0.316846	0.992124	0.194057	0.363882	0.230387	0.497298	0.970552	0.630439	0.750751	0.844379	0.895078	0.790057	1.17146	1.0014	0.731385	4.69694e-05	1.15413	up
gene-MAMSTR	161	130	155	156	210	133	154	238	151	148	203	438	365	422	476	331	587	389	365	913	2.22847	1.72828	2.13185	2.19304	2.6592	1.82183	1.95951	2.99258	1.7479	1.80631	2.33107	5.94566	5.26508	6.00578	5.58838	4.1489	8.41163	4.85128	4.26251	12.0474	2.78097e-11	1.56715	up
gene-SEMA6C	2117	1989	2198	3233	2001	2840	2655	2313	3356	2949	4374	7723	5105	6605	7537	4761	4731	6048	7490	5757	14.1686	14.026	14.0502	20.8442	12.5048	17.4502	15.8341	14.1874	20.1332	18.2705	26.2977	49.8742	34.415	46.0322	40.7574	29.8351	31.6558	39.8131	41.8652	40.3935	1.24424e-27	1.31038	up
gene-CARNS1	943	707	705	1152	1151	1021	748	922	1077	779	1791	2374	2499	2035	2747	1802	1439	1908	2130	2460	6.12047	4.87446	4.78507	7.68069	7.05058	6.4451	4.41967	5.80467	6.75386	4.84759	10.7692	15.3185	16.0056	13.991	14.9737	10.9005	9.91148	12.1971	12.0638	16.5994	5.35359e-21	1.28881	up
gene-LRRC2	17638	19585	21825	11138	17421	10738	20170	13574	26210	16998	7763	8895	7634	10365	6923	6997	7912	8465	6304	8086	43.7451	52.1648	60.8383	26.3312	41.1091	26.8774	46.1872	33.0875	58.4871	40.1819	17.4767	20.7448	17.2123	26.0145	13.3913	15.9167	19.7403	19.3452	12.9335	19.1446	1.82265e-09	-1.02542	down
NewGene_11495	2352	285	619	607	461	511	470	566	845	754	138	420	369	612	353	161	115	305	381	261	13.818	2.44929	4.44673	4.42281	3.21727	3.66497	3.08868	3.60623	5.53892	4.75247	0.974102	3.63772	2.58568	4.91687	2.26354	1.14377	1.01041	2.08503	2.29629	1.96103	0.00747272	-1.21054	down
gene-LRRC17	6	4	41	48	0	36	29	11	17	30	56	160	43	44	47	120	81	94	155	43	0.078113	0.05799	0.560972	0.649681	0	0.464113	0.360102	0.138057	0.204822	0.3814	0.685741	2.12096	0.566187	0.622893	0.517671	1.50112	1.13888	1.23084	1.80391	0.595923	0.000122946	2.00212	up
NewGene_14076	59	88	84	86	52	39	99	75	103	92	302	222	122	86	129	103	165	204	107	175	0.306182	0.4797	0.372254	0.398975	0.204262	0.18636	0.521047	0.631292	0.608659	0.598285	1.41571	1.20643	0.56457	0.626018	0.474169	0.537752	1.04498	1.20807	0.547298	0.971482	1.5405e-05	1.15159	up
gene-WNT5A	47	43	140	70	28	37	142	41	43	69	122	217	35	134	179	41	87	157	409	123	0.213968	0.284179	0.499135	0.403453	0.092872	0.122961	0.766152	0.13449	0.169666	0.455752	0.532806	1.19404	0.536452	0.758942	0.929367	0.592034	0.370545	0.76994	1.94596	0.618157	0.00257694	1.2405	up
gene-NTN1	75	69	262	118	72	164	199	72	121	106	209	336	194	202	246	271	205	195	616	144	0.366961	0.361334	1.41553	0.638589	0.33064	0.764056	1.31653	0.332731	0.552585	0.499658	1.38364	1.71985	0.931524	1.17156	1.11984	1.48362	1.06554	0.986424	2.70838	1.12471	4.83392e-05	1.14263	up
gene-MPV17	1471	527	510	427	497	326	985	548	668	476	286	275	209	271	279	260	198	291	331	266	26.2417	10.7298	9.30686	7.62807	8.41058	7.68537	16.1596	9.33981	11.9291	8.18093	4.68082	4.80506	3.64985	6.50813	4.06583	4.30014	3.68141	5.03352	5.06718	4.85774	1.11729e-06	-1.19789	down
NewGene_9848	65	8	14	5	28	56	101	72	2	73	107	100	141	47	4	212	362	54	210	127	0.271829	0.035488	0.086201	0.017397	0.110004	0.223826	0.386875	0.286988	0.007832	0.293164	0.409102	0.411484	0.577465	0.207608	0.011494	0.825352	1.58523	0.220152	0.757939	0.547392	0.0189832	1.85649	up
gene-RAPGEF5	119	136	275	154	83	87	171	90	129	77	297	319	161	187	536	167	267	211	314	190	0.456802	0.561676	1.08551	0.594249	0.303565	0.319497	0.606159	0.330147	0.464751	0.285474	1.05304	1.21158	0.609075	0.761982	1.72672	0.600773	1.07918	0.791674	1.0453	0.754418	4.77763e-05	1.07148	up
gene-GADD45G	3352	2858	3240	1972	3118	3417	2816	2744	2210	1960	1366	1353	1087	1113	544	854	652	829	2059	647	82.4039	75.2485	81.1128	48.4367	72.7199	80.2051	63.4547	64.41	50.7526	46.4995	30.7628	32.6644	26.1601	28.7284	10.9343	19.4702	16.7019	19.7982	43.5269	16.2976	3.30415e-10	-1.32727	down
gene-TPSB2	22	41	152	0	29	41	85	19	26	32	68	323	56	128	173	74	31	57	226	60	0.502833	1.04791	3.69602	0	0.635576	0.923285	1.84438	0.432762	0.575529	0.718729	1.47938	7.56284	1.29939	3.21088	3.37371	1.62251	0.763522	1.30698	4.63285	1.45908	0.0117241	1.47682	up
gene-UCN	844	389	261	208	225	163	590	290	368	181	29	16	2	157	52	6	14	46	31	15	17.7726	8.60845	5.65688	4.197	4.64117	3.11641	11.041	5.67894	7.1494	3.92842	0.51013	0.297564	0.074016	3.33984	0.897814	0.224724	0.26885	0.89644	0.556139	0.301606	4.76954e-07	-3.15025	down
NewGene_15379	31	59	75	41	46	48	73	56	68	75	98	158	80	57	96	76	106	121	231	110	0.305536	0.617249	0.751859	0.400062	0.433952	0.465017	0.657113	0.520984	0.620674	0.710793	0.885209	1.53624	0.77402	0.595385	0.77911	0.697756	1.08675	1.15698	1.96867	1.11059	6.2377e-06	1.05643	up
gene-FGB	57	70	61	76	88	73	123	49	79	93	590	111	75	308	429	84	91	116	77	95	0.474797	0.626933	0.519692	0.637941	0.703637	0.590363	0.950949	0.394857	0.621303	0.757923	4.57766	0.920991	0.617266	2.73202	2.96738	0.652555	0.79552	0.953139	0.558896	0.823995	0.000431878	1.47468	up
gene-FGA	44	59	51	41	48	38	39	32	27	75	481	54	43	181	249	47	48	51	50	66	0.537755	0.769269	0.61884	0.499876	0.435271	0.343084	0.336863	0.328483	0.238708	0.885008	5.37968	0.624863	0.516678	2.28439	2.4488	0.523409	0.603159	0.594405	0.518233	0.829984	0.00157825	1.57492	up
gene-RASGRP1	140	44	73	34	76	22	135	49	75	51	37	41	12	22	14	21	14	59	43	64	0.728925	0.279306	0.386651	0.172803	0.371468	0.108389	0.730991	0.240119	0.364429	0.254372	0.174932	0.207399	0.061424	0.114974	0.059392	0.098625	0.076027	0.295367	0.191908	0.340466	0.0217528	-1.01086	down
gene-C1QTNF3	297	302	523	667	142	548	507	263	543	558	572	597	654	1590	1747	920	1364	868	1024	634	2.63189	3.0745	4.48286	6.01561	1.2644	4.886	4.37443	2.3649	4.26259	4.86444	4.84219	5.27095	5.59433	14.7048	13.0928	7.69325	12.4428	7.32649	7.74555	5.91263	7.88636e-06	1.31244	up
gene-C1QTNF2	0	14	54	68	4	21	50	24	6	34	84	135	50	75	141	85	75	73	167	71	0	0.34424	1.2549	1.5454	0.077092	0.461408	1.04867	0.522623	0.125699	0.753178	1.75607	3.03445	1.12029	1.79408	2.64152	1.80289	1.79707	1.61824	3.30381	1.67463	0.000329533	1.86806	up
gene-C1QTNF6	33	17	132	35	22	24	75	10	49	11	103	165	60	176	83	111	76	116	206	69	0.324965	0.180088	1.31763	0.337586	0.195473	0.21393	0.675356	0.086353	0.445628	0.101284	0.925553	1.58324	0.564096	1.82132	0.667806	1.01198	0.777876	1.1067	1.74237	0.689771	0.000124933	1.6341	up
gene-GCNT4	174	119	357	132	138	126	154	98	108	202	56	67	37	43	29	109	45	87	124	41	0.558401	0.406942	1.1641	0.619721	0.419292	0.384489	0.550049	0.300285	0.323915	0.625526	0.226487	0.208995	0.113658	0.143819	0.07612	0.32293	0.150319	0.268993	0.34018	0.132163	4.9753e-05	-1.25087	down
gene-CCDC8	258	149	318	156	328	165	920	211	160	353	590	1190	404	590	746	806	679	788	1019	983	2.60313	1.61444	3.27175	1.57132	3.14956	1.59204	8.5347	2.03204	1.50401	3.44086	5.46913	11.8236	4.0009	6.273	6.17764	7.56084	7.1615	7.74487	8.86349	10.2017	8.38581e-08	1.49716	up
gene-ANKRD1	94717	56229	61755	42598	42484	17565	30919	20425	49742	37606	29322	12159	8907	33323	25987	22318	9742	18120	10709	15458	1444.38	918.191	959.021	649.055	614.705	255.778	432.216	297.454	708.651	553.358	409.599	182.14	133.025	533.788	324.251	315.772	154.926	268.411	140.417	241.746	0.00431068	-1.20594	down
NewGene_2045	163	15	132	21	84	97	56	24	69	41	44	116	103	254	187	231	203	128	383	122	1.21366	0.152154	1.43698	0.126743	0.860918	0.595806	0.468113	0.300506	0.747728	0.24166	0.244267	0.74274	0.787919	1.85619	1.23851	1.53809	1.3844	1.02588	2.41978	0.785264	0.00164844	1.43025	up
gene-PCDH18	299	172	238	61	159	184	213	88	265	148	347	407	192	326	294	352	275	415	900	172	1.53945	0.958696	1.25749	0.316209	0.783221	0.913686	1.00847	0.431505	1.27054	0.750485	1.64678	2.08177	0.987011	1.77533	1.22913	1.69984	1.4804	2.08638	4.02105	0.911088	0.00044573	1.06603	up
gene-PKMYT1	105	160	132	229	515	298	609	271	306	440	163	94	103	95	133	80	85	113	198	94	1.14362	1.82066	1.42615	2.43261	5.44256	3.02925	6.62791	2.9402	3.04619	4.52219	1.75094	0.981042	1.09247	1.05802	1.42744	0.786005	1.04714	1.16157	1.81365	1.19982	5.59347e-06	-1.28186	down
gene-FGFR4	107	159	77	238	92	118	136	40	115	86	257	454	382	485	493	329	555	272	668	324	0.936163	1.44795	0.648799	2.10176	0.751191	0.997247	1.10181	0.320051	0.890987	0.688853	2.03105	3.81013	3.19995	4.3575	3.42159	2.60791	4.97665	2.26361	4.90129	2.84157	5.93626e-13	1.92857	up
gene-FOSL2	4522	2752	4939	1831	3780	2793	3117	1948	3060	1568	1041	1329	890	1542	2036	1116	696	707	1964	668	22.28	14.6899	24.1013	8.83724	17.0615	12.9304	13.9943	8.84427	14.4373	7.39284	4.51796	6.44512	4.10381	7.93894	8.57216	5.00486	3.6911	3.37768	8.06064	3.32021	1.79871e-07	-1.27261	down
gene-SLC1A3	135	70	133	233	126	125	120	124	122	138	384	161	229	284	423	252	489	331	241	141	0.922364	0.508426	0.927904	1.5888	0.813135	0.81263	0.750854	0.809268	0.777763	0.907246	2.40635	1.08151	1.53445	2.04064	2.36987	1.60022	3.48919	2.19822	1.41988	0.985181	2.31856e-06	1.25997	up
gene-SLC1A5	1157	625	721	415	852	569	915	339	1058	378	268	369	211	234	433	453	247	245	607	212	10.7141	6.19571	6.79728	3.83692	7.48865	5.03006	7.77008	2.99776	9.15609	3.37889	2.27201	3.35202	1.9081	2.2703	3.28219	3.88792	2.38305	2.20295	4.8316	2.00792	5.47197e-05	-1.03388	down
gene-AQP1	7484	14401	11320	10063	9267	7411	8866	9051	17884	14797	5629	4016	3677	8534	7759	3844	2854	3731	5046	4010	74.7885	154.1	115.198	100.477	87.8632	70.7198	81.2156	86.3782	166.967	142.68	51.5227	39.4201	35.9844	89.5774	63.4354	35.6388	29.7367	36.2185	43.3604	41.0929	2.86852e-06	-1.08012	down
gene-AQP4	145	83	206	109	170	103	74	140	213	97	476	421	523	239	614	841	595	828	470	839	0.633271	0.385182	0.976633	0.472778	0.70301	0.426786	0.294686	0.619372	0.86914	0.407457	2.03244	1.80769	2.23813	1.17299	2.19666	3.64784	2.90125	3.761	1.7666	3.7618	5.01249e-20	2.23439	up
gene-CCDC71L	603	1411	2889	932	1030	726	940	1275	1027	596	174	453	233	102	453	631	267	187	375	568	3.18798	7.99004	15.5668	4.92308	5.16991	3.66619	4.55788	6.44268	5.07315	3.04107	0.841141	2.35069	1.20535	0.565643	1.95806	3.09475	1.46967	0.956222	1.70516	3.08117	6.06831e-07	-1.65219	down
gene-BMF	37	52	147	109	96	102	262	102	47	118	170	360	122	69	159	202	186	272	211	235	0.200851	0.306222	0.818681	0.658489	0.49964	0.535003	1.32793	0.537244	0.238448	0.626915	0.862965	2.00166	0.675787	0.392359	0.713495	1.10356	1.10962	1.45743	1.01086	1.3806	0.00220658	1.00254	up
gene-TSPAN5	141	94	151	76	93	51	70	44	178	43	53	41	42	26	40	53	25	46	80	24	2.57033	1.84334	2.80926	1.38366	1.60653	0.885134	1.16127	0.763438	3.03322	0.759533	0.879104	0.733649	0.735566	0.499349	0.584818	0.898971	0.475839	0.818068	1.2506	0.436263	0.00171804	-1.06212	down
gene-TRIM63	22950	23400	28154	8633	21816	17064	18350	17494	30762	13941	5409	3903	2816	8888	5337	2967	2241	3377	4311	2134	347.515	379.414	434.386	130.61	313.448	246.749	254.724	253.056	435.18	203.671	75.0221	58.0472	41.7616	141.364	66.1235	41.6809	35.3933	49.6663	56.1266	33.1312	1.42259e-11	-2.18938	down
gene-RFTN1	650	1173	1770	959	1317	1160	1444	1212	1286	847	695	617	314	250	438	531	471	483	707	477	6.10674	11.812	16.9339	9.09759	11.757	10.4035	12.4628	10.8666	11.3247	7.67497	6.16306	5.68926	3.23751	2.46352	3.36438	4.63628	4.70314	4.40086	5.72186	4.59067	8.96023e-11	-1.15411	down
gene-FOXO1	4960	8614	10172	5174	5370	10202	8729	6637	10294	6617	1113	5382	2236	4974	3804	5125	1871	806	3946	2266	23.1508	43.057	48.3533	24.1316	23.783	45.4738	37.3517	29.5848	44.8916	29.8021	4.75826	24.68	10.2219	24.3867	14.5267	22.195	9.10469	3.65259	15.838	10.8481	0.000656489	-1.1961	down
gene-PPP1R3D	602	386	353	427	488	400	731	541	591	893	1663	1190	1455	748	1383	993	1032	1542	1358	1132	4.62989	3.17535	2.761	3.2809	3.55952	2.93949	5.15401	3.97332	4.24414	6.63374	11.7278	8.99866	10.9691	6.04789	8.70688	7.08813	8.27924	11.5328	8.98836	8.93747	1.13197e-13	1.3042	up
gene-LOC112449293	33	45	96	106	53	4	49	38	30	47	98	27	74	57	318	133	81	297	18	76	0.29295	0.422508	0.906508	0.969019	0.504111	0.034122	0.394178	0.31113	0.245705	0.391035	0.890177	0.2447	0.678781	0.550018	2.68294	1.25283	0.840186	2.75385	0.147563	0.861075	0.0204006	1.30407	up
gene-CCL2	167	49	39	37	44	42	190	22	68	33	232	107	12	290	571	128	97	129	210	94	5.78059	1.81649	1.35797	1.25593	1.4473	1.36429	6.03553	0.721959	2.18812	1.09129	7.35109	3.63337	0.373843	10.5495	16.1827	4.10006	3.48515	4.31456	6.25392	3.33533	0.0047817	1.50065	up
gene-PTX3	3259	2324	578	111	5885	230	275	815	6297	74	63	22	46	31	6	63	56	40	16	36	47.2054	36.0509	8.52343	1.60486	80.8955	3.17004	3.64808	11.2739	85.2307	1.02214	0.833756	0.301344	0.646048	0.457992	0.069311	0.843412	0.842425	0.549078	0.193688	0.52324	1.28919e-13	-5.5465	down
NewGene_15283	82	77	72	50	126	75	122	105	101	73	57	44	35	41	41	37	28	46	34	25	0.79277	0.791718	0.705353	0.481447	1.15545	0.690968	1.07736	0.962157	0.909293	0.67332	0.500205	0.411149	0.330446	0.406922	0.32325	0.324651	0.278845	0.429458	0.275076	0.240338	3.52554e-07	-1.08235	down
NewGene_15756	310	76	71	89	111	119	140	145	117	100	39	23	24	48	21	35	22	15	95	31	2.66482	0.786024	0.634212	0.745177	0.97214	1.00692	1.09509	1.38952	0.816181	0.92398	0.295185	0.168459	0.172601	0.439775	0.178843	0.311505	0.184295	0.128041	0.76657	0.431017	6.75881e-07	-1.80158	down
gene-LOC534578	17	11	57	32	9	21	71	12	6	8	66	84	56	35	102	42	130	101	101	56	0.143481	0.097802	0.50572	0.272552	0.066827	0.168541	0.567099	0.09766	0.04861	0.059631	0.52042	0.712431	0.473468	0.316823	0.722305	0.336704	1.17432	0.847536	0.751292	0.493599	6.06428e-05	1.79301	up
NewGene_7574	123	43	59	106	79	59	116	44	159	115	38	76	16	40	29	14	62	75	29	32	0.775597	0.291352	0.375542	0.668705	0.470339	0.356584	0.672107	0.262908	0.938082	0.701866	0.219534	0.469583	0.095864	0.264234	0.149604	0.081504	0.40737	0.458649	0.15351	0.208229	0.00654035	-1.03451	down
gene-DUSP5	1022	95	69	60	128	44	98	36	86	37	28	38	8	41	66	25	20	31	24	19	11.3281	1.11644	0.772614	0.656906	1.34309	0.461337	0.990222	0.378748	0.887799	0.390314	0.282615	0.405482	0.081351	0.470001	0.591206	0.255467	0.228806	0.333358	0.219856	0.211217	0.000308482	-2.51074	down
gene-MT1A	1124	766	118	67	979	35	77	117	1212	93	84	10	11	21	29	45	41	16	6	51	71.9427	53.1307	7.46975	3.75765	60.1353	2.00243	4.07718	6.55298	72.6089	5.62948	4.82603	0.623099	0.512829	1.43886	1.44557	2.57969	2.77	0.806513	0.313743	3.17711	7.20599e-07	-3.75774	down
gene-SGPL1	741	532	638	394	667	426	746	348	848	263	151	322	164	138	241	222	124	208	376	218	4.75509	3.6569	4.17037	2.52735	4.0613	2.60667	4.42966	2.12365	5.08374	1.64027	0.884047	2.06849	1.02346	0.926405	1.26124	1.31154	0.825377	1.32109	2.07501	1.44638	1.82265e-09	-1.30966	down
gene-MNT	1028	1909	2113	526	2274	2664	2592	1738	2663	1394	348	649	404	1291	731	572	313	202	654	185	5.68633	11.3768	12.4425	2.93245	12.5217	14.7191	13.7465	9.24414	14.0441	7.49904	1.82458	3.53612	2.27846	7.70034	3.35248	3.00707	1.82901	1.08126	3.19235	1.05907	8.45924e-06	-1.69754	down
NewGene_2973	20	30	20	10	12	46	79	28	9	71	55	71	61	17	26	104	58	56	139	88	0.351143	0.569777	0.362441	0.170304	0.203888	0.79746	1.32227	0.489137	0.147942	1.24138	0.907065	1.26641	1.07746	0.323067	0.382619	1.75252	1.10639	0.990221	2.18439	1.643	0.0178074	1.15985	up
gene-KLHL40	51340	41329	38233	27045	34841	17282	51391	28388	36328	23169	22699	5822	5723	14696	10345	8481	6121	14391	7421	5756	739.414	637.397	560.757	389.181	476.101	237.665	678.489	390.451	488.802	321.985	299.468	82.3676	80.7288	222.326	121.905	113.328	91.9303	201.334	91.9052	85.0094	2.03541e-06	-1.68016	down
gene-NABP1	737	169	215	124	311	150	297	269	247	320	158	73	63	186	76	42	69	96	90	51	7.00156	2.21977	2.36617	1.33159	2.89343	1.71972	2.6912	2.70554	2.49722	3.00552	1.45976	0.875571	0.581534	1.93745	0.725787	0.348835	0.679216	1.15379	0.857547	0.486734	1.76456e-05	-1.55493	down
gene-MASP1	434	460	683	428	261	605	422	304	599	492	703	1513	725	522	1800	878	1054	1142	1138	875	3.43339	3.76502	5.27672	3.26929	1.84792	4.44262	2.90392	2.36542	4.36646	3.81794	4.82217	10.8736	5.45734	4.15744	11.1658	6.07563	8.31118	8.4365	7.22814	6.71127	2.25222e-09	1.20319	up
gene-SMPDL3A	401	629	737	1282	655	1405	873	1061	687	950	528	508	182	391	461	332	291	468	652	307	5.45747	9.15836	10.2098	17.4334	8.44975	18.2591	10.8887	13.7891	8.72743	12.4702	6.57803	6.78186	2.42149	5.58915	5.13243	4.19434	4.12344	6.17875	7.63148	4.28573	1.15045e-05	-1.01018	down
gene-CACNA2D3	114	126	123	152	73	369	116	73	123	172	19	68	138	23	56	23	18	34	62	80	0.773918	0.945391	0.859213	1.04258	0.504277	2.44921	0.727463	0.477041	0.785022	1.13519	0.116665	0.454753	0.944772	0.168747	0.310441	0.140711	0.125934	0.225696	0.365645	0.581355	0.00119262	-1.37919	down
gene-PANK1	3177	6701	10362	1121	5208	5931	6918	6173	6874	4338	1019	822	505	278	642	331	443	436	443	518	22.6106	51.3562	77.6178	7.92266	35.1635	40.2006	45.2185	41.7089	45.5627	29.637	6.67052	5.69266	3.65507	2.0758	3.91369	2.17515	3.32212	2.99208	2.68852	3.81583	1.54949e-34	-3.28762	down
gene-SPSB1	2167	2152	1676	951	2419	1015	2284	1524	3206	873	899	1054	730	559	1288	982	531	344	1633	536	17.0743	20.1335	14.745	5.74767	19.9578	8.0948	17.8834	9.34725	24.4254	7.07033	4.20374	8.17563	4.20528	4.65833	5.68791	5.65634	3.12216	2.73247	8.88225	4.5285	0.000218476	-1.03618	down
gene-PDE1C	95	41	207	171	87	105	103	108	76	117	366	289	164	149	256	183	298	360	246	223	0.435959	0.186054	0.947361	0.823143	0.313611	0.348605	0.384198	0.385281	0.302544	0.509853	1.54176	1.33259	0.761646	0.587556	1.0364	0.672857	1.32252	1.52838	0.90955	1.06017	4.34464e-07	1.28802	up
gene-HIST1H2AC-2	3829	1469	2208	1439	2360	2304	1590	686	2785	1054	531	335	579	413	895	1018	313	693	1194	647	162.013	65.2659	92.4761	57.9923	94.7787	90.9716	63.0548	26.6931	108.212	43.6713	21.0165	13.6503	23.2249	18.4343	29.7019	39.7987	13.3265	29.0573	43.9343	27.3848	2.64237e-07	-1.51111	down
gene-HMOX2	2471	4964	3763	1919	4873	2093	6647	3305	3939	2937	3662	963	872	1426	919	837	703	1049	1176	634	37.2427	80.4612	57.9931	29.0227	70.024	30.2371	92.1577	47.608	55.6804	42.8633	50.6754	14.3176	12.9206	22.6612	11.3784	11.7507	11.0884	15.3176	15.2727	9.84363	3.68914e-05	-1.4689	down
gene-NPTX1	139	306	60	40	268	50	64	37	329	49	19	43	0	12	14	26	8	3	19	28	1.82383	4.30748	0.798304	0.523959	3.33402	0.616855	0.761398	0.459066	4.0344	0.617406	0.223107	0.553127	0	0.163859	0.148383	0.309336	0.097171	0.038352	0.21222	0.366578	4.70954e-07	-2.92746	down
gene-DLK1	91	45	44	114	31	91	137	28	0	19	559	254	93	240	304	155	98	44	48	47	1.79781	0.88243	0.893232	2.25755	0.584219	1.72914	2.47382	0.44814	0	0.296466	10.1688	4.90155	1.79418	4.87569	4.73524	2.70734	1.92787	0.798554	0.79234	0.941089	0.0231614	1.71034	up
gene-CA4	102	135	205	244	319	171	320	235	142	202	768	821	508	545	1154	919	834	620	671	580	2.36894	3.27326	4.79976	5.76744	7.3002	3.54184	6.85067	4.91946	3.02704	4.45678	16.6729	19.2142	11.8126	13.7185	22.7428	20.5533	19.2709	13.7593	11.9668	13.6224	1.68396e-25	1.94867	up
gene-METTL7B	254	556	589	304	523	167	242	484	135	249	149	76	73	95	70	34	64	24	16	38	4.024	9.44447	9.51961	4.81078	7.86925	2.52593	3.51286	7.33317	1.99133	3.80848	2.16242	1.1786	1.13481	1.5815	0.905285	0.498227	1.05806	0.368653	0.214461	0.602715	1.5524e-09	-2.34579	down
gene-GABARAPL1	4338	6008	9375	4967	4506	9545	7170	7210	8349	4026	1707	2991	1442	2015	1157	2477	1810	3381	2613	2015	60.4741	89.6953	133.111	69.1957	59.6109	127.086	91.6413	96.0088	108.749	54.1554	21.8008	40.9607	19.6909	29.5062	13.1972	32.0408	26.3123	45.7944	31.3226	28.8112	7.00365e-14	-1.50555	down
gene-NECTIN1	71	163	83	71	110	88	115	39	105	81	38	30	17	64	36	24	14	10	47	28	1.09641	2.70514	1.30446	1.08642	1.61233	1.29621	1.63347	0.572796	1.50961	1.20668	0.533625	0.454126	0.256571	1.03334	0.451344	0.335806	0.224569	0.149727	0.616825	0.440838	1.11624e-05	-1.5012	down
gene-SLC38A4	33	10	49	62	28	56	38	20	32	23	86	109	177	148	75	150	221	247	351	255	0.21269	0.067415	0.324961	0.40991	0.172	0.350712	0.228662	0.124289	0.192809	0.143333	0.51645	0.702761	1.144	1.02305	0.402816	0.919913	1.54508	1.59989	2.01281	1.75076	3.46896e-14	2.48588	up
gene-RCAN1	5685	8510	15613	9009	4756	7602	3053	3250	4931	5453	2120	3048	1818	4860	2577	3365	2126	2516	5721	2123	66.4201	106.577	186.114	104.265	52.3103	84.8018	32.2935	35.9667	53.4585	59.524	22.1735	34.7004	20.2254	59.5311	23.9206	35.8034	25.6115	28.3322	56.7181	25.0727	0.00342894	-1.09493	down
gene-LRIF1	3216	622	921	986	840	373	753	382	944	782	371	450	334	428	411	315	369	421	385	323	18.9339	3.94323	5.45185	7.21781	4.99635	1.95608	3.99072	2.36867	5.59847	4.24634	2.21815	2.92251	2.27054	2.56294	1.95695	1.55644	2.56853	2.77052	2.03689	2.24656	9.472e-05	-1.31152	down
NewGene_11066	332	108	53	79	119	34	59	57	11	79	40	47	19	23	56	34	31	10	44	8	2.40759	0.838149	0.371722	0.59631	0.785713	0.238259	0.373848	0.399677	0.071598	0.524719	0.24593	0.323232	0.119917	0.154746	0.324541	0.224217	0.245977	0.063588	0.259793	0.053593	0.00296457	-1.58131	down
gene-FAM13C	94	142	215	138	88	98	174	109	152	161	279	296	158	151	163	232	246	477	282	336	0.704185	1.2086	1.75168	1.05858	0.612924	0.688186	1.23124	0.776447	1.0617	1.25271	1.99426	2.29746	1.22409	1.18054	1.06474	1.67341	2.03812	3.61367	1.93793	2.7686	1.15769e-05	1.02987	up
gene-LRRC14B	464	281	386	786	642	906	803	589	470	817	861	1833	1625	1025	2001	1279	1035	910	1599	1682	4.43635	2.88239	3.76472	7.51562	5.82821	8.28547	7.04467	5.38586	4.20535	7.55023	7.55614	17.2456	15.2451	10.3062	15.6836	11.3644	10.3331	8.46874	13.1721	16.5213	7.67391e-10	1.26488	up
gene-MYC	2793	1285	1586	686	3373	1837	1644	1017	1335	918	664	529	290	930	451	426	284	465	1304	384	33.4968	16.315	19.3962	8.21979	38.016	20.7098	18.0275	11.6548	15.0753	10.5805	7.31075	6.09276	3.38812	11.7578	4.41141	4.77697	3.57695	5.31622	13.3874	4.75509	3.06612e-06	-1.44858	down
gene-KLHL6	743	625	756	140	192	192	564	316	579	340	147	73	30	168	116	39	31	171	60	82	3.43714	3.09467	3.56165	0.643282	0.839274	0.845652	2.38944	1.39491	2.50074	1.51705	0.621646	0.330277	0.132715	0.815179	0.436309	0.165885	0.148102	0.767788	0.23778	0.387731	2.61978e-08	-2.19828	down
gene-SRXN1	1060	597	527	312	648	606	1365	673	1016	1127	578	186	129	321	381	227	164	238	349	255	11.1477	6.71499	5.64055	3.27709	6.46795	6.07833	13.1622	6.75221	9.97904	11.4408	5.56483	1.9183	1.32868	3.53685	3.27466	2.21352	1.78876	2.42931	3.14843	2.74293	7.43634e-07	-1.38653	down
gene-ZNF729	48	45	100	36	95	39	112	71	109	70	21	37	29	16	23	20	19	37	25	36	0.457805	0.459229	0.974998	0.343826	0.862085	0.347332	0.981051	0.647699	0.979776	0.640767	0.181796	0.34477	0.261414	0.148947	0.173024	0.173255	0.18164	0.330122	0.206301	0.340547	7.57478e-07	-1.34557	down
NewGene_5774	95	123	73	50	95	103	112	68	140	85	29	43	22	34	31	39	22	31	62	21	2.13601	2.97592	1.67198	1.11352	2.02411	2.21413	2.30522	1.45303	2.94387	1.83629	0.581466	0.95057	0.482839	0.79507	0.557665	0.809315	0.513017	0.673362	1.19836	0.484374	1.57791e-09	-1.42775	down
gene-TSSK3	122	111	100	56	100	57	110	68	96	78	141	26	12	34	16	14	12	23	29	23	2.03399	2.00266	1.71409	0.934506	1.59159	0.907447	1.68705	1.0782	1.49381	1.24603	2.17285	0.433741	0.188694	0.593281	0.211937	0.205456	0.197959	0.358454	0.419861	0.392293	0.00356665	-1.34462	down
gene-PLCXD2	737	166	78	120	218	102	157	92	321	150	148	100	51	81	65	39	51	125	119	79	2.54719	0.614221	0.274378	0.413987	0.713948	0.335037	0.496702	0.302983	1.03731	0.499554	0.466522	0.339426	0.169859	0.293023	0.182809	0.124963	0.181152	0.418521	0.352113	0.278715	0.00294455	-1.28485	down
gene-GLCE	416	600	1241	613	715	864	712	676	869	384	285	498	260	219	312	351	205	311	494	280	2.16142	3.44233	6.48292	3.14257	3.42747	4.17755	3.30652	3.60778	4.10345	1.88363	1.56864	2.4791	1.50167	1.15871	1.30974	1.64314	1.07817	1.77424	2.43584	1.66156	2.18222e-08	-1.06296	down
gene-MEGF6	27	30	42	51	37	87	52	8	37	16	76	76	36	28	82	91	52	97	174	68	0.111286	0.13194	0.195797	0.229319	0.141844	0.34022	0.196606	0.028738	0.141882	0.06175	0.31011	0.310429	0.14407	0.12151	0.277847	0.348141	0.223482	0.425938	0.617111	0.287898	0.00568721	1.07508	up
gene-OLFML2B	152	175	593	250	157	353	362	116	234	245	459	555	332	789	505	495	424	491	832	319	1.39809	1.77557	5.36623	2.35631	1.39126	3.16645	3.01948	1.04918	1.96251	2.18973	3.78007	4.88766	3.08013	7.26697	3.80599	4.21616	4.01304	4.36289	6.4763	2.951	4.48235e-05	1.09462	up
NewGene_14216	289	137	132	74	77	104	66	68	507	171	21	4	34	8	162	56	67	33	28	80	4.11161	2.24829	1.63326	0.795941	0.965145	1.39039	0.717427	0.923029	6.48469	2.31167	0.180458	0.037795	0.502864	0.079485	1.70209	0.661442	0.827714	0.374758	0.346388	0.964208	0.0040006	-1.64598	down
gene-CXCL14	141	474	1039	603	230	492	737	479	363	189	85	224	187	140	132	109	51	142	175	246	2.28026	8.24505	17.1852	9.78292	3.53915	7.62309	10.9651	7.42331	5.50594	2.95458	1.25275	3.56609	2.97252	2.38166	1.75274	1.64076	0.856159	2.2378	2.43389	4.08431	2.77756e-06	-1.57501	down
gene-CXCL10	56	45	29	41	8	12	54	2	92	67	94	101	36	95	109	89	124	222	30	43	1.2651	1.07072	0.667673	0.911947	0.161603	0.256562	1.10648	0.042789	1.93437	1.44985	1.93197	2.23741	0.778685	2.23978	2.01239	1.85745	2.91785	4.87528	0.57584	0.978448	0.016743	1.31739	up
gene-GLT8D2	22	74	293	97	18	106	160	42	38	70	114	268	161	130	347	278	172	222	369	142	0.386432	1.45462	5.48648	1.76887	0.303257	1.85403	2.68402	0.725087	0.647246	1.23054	1.9172	4.83262	2.88586	2.50687	5.21334	4.73826	3.2848	3.96373	5.8279	2.66385	0.00161326	1.34818	up
gene-SEMA3G	548	744	965	740	713	793	988	650	538	843	1692	2047	716	693	1700	1474	1421	1928	1217	1612	3.0224	4.39896	5.42281	4.07953	3.7339	4.1741	4.99806	3.42094	2.77099	4.48813	8.55551	11.1043	3.87396	4.019	7.67947	7.54663	8.17823	10.3402	5.77755	9.12558	1.37242e-08	1.03124	up
gene-FAM222A	225	516	451	488	439	861	496	289	482	199	35	81	68	141	84	67	122	73	139	245	1.96021	4.89841	4.29517	4.48213	3.84963	7.60771	4.10637	2.49104	4.09713	1.74265	0.245146	0.732292	0.622577	1.36407	0.629769	0.575387	1.14066	0.643626	1.08344	2.30173	1.36983e-09	-1.95568	down
NewGene_10262	300	584	1558	281	326	754	971	605	340	291	129	343	90	175	806	87	162	88	167	115	0.907063	1.83923	5.04494	0.872217	1.0004	2.29243	2.73068	1.69184	1.33918	1.08748	0.29107	1.2025	0.302586	0.558193	1.98327	0.226175	0.467413	0.232939	0.544319	0.372251	0.00388826	-1.4315	down
NewGene_1244	7	23	17	57	16	40	47	44	71	22	68	100	48	49	16	122	57	19	72	121	0.111885	0.563045	0.356976	1.39655	0.41558	0.786973	0.934	0.797694	1.38118	0.377012	1.1975	2.01668	0.960866	1.03821	0.243592	2.69052	1.46138	0.511358	1.06888	3.26895	0.0271133	1.08782	up
NewGene_3080	363	182	155	120	283	238	440	168	385	242	201	59	75	100	61	34	94	74	106	46	3.15341	1.69438	1.37092	1.04213	2.32933	1.96947	3.50022	1.39301	3.12165	2.02857	1.59497	0.499148	0.632582	0.912976	0.429661	0.271499	0.849479	0.623675	0.787047	0.402711	5.23641e-06	-1.46826	down
NewGene_6755	900	325	645	371	510	399	804	426	816	585	154	193	168	252	325	227	81	352	212	298	16.996	6.57002	12.4034	6.9897	9.12978	7.18887	13.9243	7.67117	14.4047	10.6527	2.64888	3.56478	3.10938	4.99827	5.0185	3.97248	1.58091	6.45668	3.43596	5.75649	2.84843e-07	-1.26212	down
gene-H2B	449	194	214	308	153	290	132	151	133	88	68	57	100	98	73	184	57	20	178	168	15.6623	7.24319	7.57572	10.7082	5.0513	9.66091	4.1976	5.01463	4.3192	2.94467	2.16319	1.93428	3.40026	3.57777	2.0782	5.95883	2.06019	0.656913	5.32744	6.01274	0.0183804	-1.00955	down
gene-PELI2	120	143	391	207	168	232	203	217	117	305	415	464	306	391	533	432	290	382	569	226	0.554288	0.713871	1.85729	0.950993	0.727659	1.00917	0.867044	0.946866	0.499006	1.3714	1.77284	2.12608	1.39426	1.91598	2.03316	1.86658	1.4096	1.69343	2.27893	1.07689	2.69428e-06	1.01418	up
gene-KCNMB4	1121	777	1012	470	1047	565	1121	822	1249	615	310	308	140	192	163	234	276	194	327	190	7.99691	5.87542	7.22515	3.25325	7.05855	3.72383	7.26461	5.52979	8.14987	4.1827	2.00458	2.19128	0.983845	1.40843	0.945672	1.54588	2.00522	1.35307	1.99009	1.37232	3.57137e-20	-1.81603	down
gene-RGS1	641	352	694	87	318	373	833	202	337	158	84	486	100	55	144	239	102	165	420	121	12.947	7.62073	14.3784	1.75361	6.08971	7.24964	15.4324	4.07281	6.36263	3.11652	1.5399	9.65199	1.97166	1.19624	2.38518	4.51039	2.14572	3.22948	7.30147	2.50549	0.0198271	-1.02492	down
gene-RGS6	72	28	62	54	24	53	68	14	20	49	83	160	84	94	134	90	63	103	118	75	0.29731	0.13102	0.266959	0.218829	0.09241	0.218946	0.287437	0.054098	0.073983	0.246905	0.32801	0.780885	0.385371	0.468056	0.521142	0.380331	0.337128	0.408607	0.45133	0.376171	2.04144e-05	1.24603	up
gene-CTH	178	97	89	79	161	31	156	110	71	138	47	43	19	39	56	19	23	35	69	46	2.32597	1.23772	1.19437	1.08658	2.10175	0.354638	1.99874	1.45155	0.892115	1.84318	0.506544	0.591144	0.256014	0.540821	0.600042	0.24257	0.313482	0.475906	0.742536	0.655033	6.71571e-06	-1.42809	down
NewGene_10068	962	97	221	152	108	182	130	57	98	94	72	54	38	55	66	129	43	91	158	144	3.63409	0.39174	0.846918	0.571814	0.386091	0.654632	0.447155	0.205129	0.344076	0.342664	0.247375	0.199639	0.138131	0.216472	0.203682	0.449786	0.16626	0.330871	0.511341	0.554452	0.0135921	-1.29329	down
gene-LOC100850659	4	0	45	152	10	17	73	10	16	57	258	231	61	57	99	127	69	73	252	105	0.020505	0	0.259247	0.867361	0.053946	0.090134	0.380276	0.054552	0.082226	0.312037	1.35774	1.29879	0.339284	0.337644	0.463397	0.674529	0.406383	0.404268	1.2408	0.615222	0.0145689	1.86217	up
gene-HSPH1	20120	5974	2301	4622	4380	2829	5537	3673	6069	4396	2264	1011	1342	3015	2532	866	935	1817	2207	890	149.469	47.6656	17.4744	34.4915	31.0549	20.1168	37.9232	26.113	42.281	31.6647	15.4283	7.377	9.77036	23.6146	15.4194	5.98121	7.24226	13.1387	14.1527	6.77869	5.51269e-05	-1.78833	down
gene-CSMD2	17	22	35	51	29	9	19	20	17	28	44	65	95	36	95	89	47	33	143	77	0.032615	0.045685	0.071408	0.10133	0.054704	0.017211	0.03394	0.037757	0.03072	0.053995	0.079705	0.127879	0.185125	0.074078	0.154204	0.164351	0.096803	0.064092	0.245344	0.158219	2.95822e-06	1.61545	up
gene-GPX3	7692	9942	6547	6558	13125	7120	13320	5301	17677	5025	2126	6071	2498	1742	5637	4059	2536	2597	3433	2412	128.922	178.441	111.743	109.823	208.736	113.961	204.668	84.8509	276.81	81.2596	32.6378	99.9561	40.9965	30.6637	77.3093	63.1173	44.326	42.2703	49.4718	41.4481	7.04698e-09	-1.40628	down
gene-ESRRG	2269	2176	2257	1422	3132	1527	5158	3329	3976	5820	1296	81	105	167	202	92	188	341	261	266	11.8135	11.9861	11.8206	7.3074	15.4479	7.37191	24.6092	16.3533	19.1072	29.0203	6.10408	0.400216	0.515698	0.895692	0.83484	0.428645	0.990425	1.67264	1.13188	1.3799	4.37136e-11	-3.23775	down
gene-EYA1	310	105	165	159	254	228	164	182	250	251	183	602	539	356	474	387	407	285	466	501	2.07759	0.685724	1.02455	0.967805	1.54193	1.45604	0.978579	1.05692	1.42119	1.47981	1.02761	3.86341	3.46056	2.48778	2.58946	2.40234	2.79333	1.85248	2.55704	3.32116	8.36451e-07	1.11407	up
gene-STEAP4	97	45	53	82	24	12	38	28	35	93	332	286	184	62	76	165	202	185	260	220	0.563579	0.27832	0.315693	0.479883	0.129939	0.064546	0.202012	0.15448	0.188866	0.523943	1.78211	1.64373	1.05202	0.378744	0.360941	0.893531	1.23402	1.05295	1.3076	1.3217	1.5708e-07	2.01853	up
gene-CIB2	345	304	247	694	594	569	451	342	526	317	162	115	162	295	250	256	128	111	427	155	6.74056	6.45252	4.94777	13.4247	10.9405	10.482	8.00577	6.40126	9.42012	5.8794	2.89836	2.18179	2.92714	5.96273	3.90301	4.63483	2.54473	2.07847	7.13839	2.94204	0.000298927	-1.00262	down
gene-SBK1	65	102	75	61	101	90	204	264	63	293	289	424	312	162	322	162	217	285	325	378	0.35302	0.59551	0.428122	0.332576	0.526352	0.465854	1.02928	1.37967	0.318978	1.54799	1.45414	2.28645	1.67941	0.940371	1.44338	0.823906	1.24446	1.51654	1.53435	2.13296	0.00024778	1.2093	up
gene-TRIL	97	107	325	235	70	111	239	119	149	132	366	322	175	163	317	284	317	379	439	338	0.3562	0.423454	1.22326	0.865135	0.245432	0.389644	0.807335	0.419012	0.512931	0.470564	1.23892	1.16853	0.63359	0.632537	0.95811	0.97218	1.22135	1.36163	1.39395	1.28107	6.06428e-05	1.06421	up
gene-OTUD1	21258	13141	20664	7332	13272	12105	12932	12588	6494	13758	6212	1808	5032	16891	5169	9144	3002	1889	5448	3738	196.748	130.236	194.761	67.8053	116.551	106.983	109.72	111.257	56.1458	122.865	52.6615	16.4306	45.6109	164.212	39.1445	78.5182	28.9684	16.9769	43.3557	35.4807	0.0433624	-1.05708	down
gene-CSRNP3	74	39	77	161	38	141	49	47	50	143	110	242	81	38	180	100	203	210	125	320	0.159413	0.090078	0.168718	0.345622	0.07644	0.289284	0.096961	0.096667	0.099488	0.296752	0.216139	0.511915	0.169363	0.084233	0.31653	0.198817	0.455529	0.464785	0.230866	0.706978	0.0121199	1.04579	up
gene-PLIN1	209	190	451	330	157	185	284	495	245	56	94	701	220	839	148	665	91	328	3498	367	1.71508	1.67086	3.78512	2.716	1.21718	1.45715	2.13644	3.90081	1.8846	0.432088	0.701642	5.67527	1.76861	7.27154	0.995009	5.09021	0.780359	2.62871	24.8679	3.09757	0.0428197	1.40344	up
gene-OLFML3	228	390	383	417	235	347	397	286	346	474	527	866	869	750	1091	767	698	682	913	632	3.43793	6.30384	5.89554	6.28925	3.36476	5.00429	5.50365	4.12919	4.88518	6.90865	7.29401	12.8679	12.8643	11.9036	13.4933	10.7629	11.0017	10.0155	11.8762	9.79606	2.6625e-16	1.24019	up
gene-SAA3	172	267	486	333	1663	263	264	106	115	39	4	50	23	18	17	40	9	25	47	33	8.3818	13.9649	24.2012	16.2687	77.1529	12.2359	11.8223	4.94378	5.25314	1.80736	0.1789	2.382	1.07167	0.891463	0.65358	1.77905	0.450864	1.15346	1.93892	1.64446	1.59228e-10	-3.70118	down
gene-RETREG1	26329	15781	22876	17163	19117	13444	29840	21180	42803	34793	20260	6077	5138	18041	6340	5643	5231	11827	10779	3054	232.974	143.335	191.316	139.553	150.416	104.814	229.144	155.389	299.652	268.67	150.591	51.5569	39.7922	156.639	43.7795	40.444	46.6118	93.7695	67.1586	21.732	0.0025817	-1.27262	down
gene-SLC27A4	87	244	163	82	222	142	291	170	348	86	64	94	44	103	62	64	60	103	84	72	0.829514	2.50648	1.58807	0.780416	2.01824	1.29604	2.55543	1.55301	3.11456	0.790412	0.557348	0.879553	0.41015	1.03608	0.483474	0.562701	0.595735	0.959818	0.689351	0.700374	4.24451e-05	-1.17977	down
gene-SYNJ2	555	1954	1093	393	732	628	1553	812	2316	1062	562	179	104	758	231	95	107	139	169	110	1.9102	7.63528	4.29507	1.35223	2.44489	2.22213	5.15846	2.74849	8.11507	3.52942	1.82009	0.661975	0.348484	2.81463	0.667817	0.318879	0.391813	0.477144	0.52281	0.395615	7.23897e-05	-2.03712	down
gene-WISP2	182	157	115	132	171	116	158	60	99	91	139	554	189	130	218	210	93	329	642	192	2.1386	2.23407	1.71656	1.51161	2.2809	1.70803	2.07502	0.732389	1.02328	1.25178	1.75118	7.19093	2.62541	2.16679	2.25632	2.28518	1.34814	4.36518	6.59683	2.33642	0.000809108	1.08165	up
gene-ZNF750	53	130	149	145	192	433	134	201	144	277	158	1810	416	203	611	615	793	728	1387	625	0.453225	1.19396	1.29971	1.2422	1.56659	3.56233	1.05336	1.64695	1.15271	2.29923	1.24106	15.3265	3.50578	1.83375	4.30456	4.91412	7.12399	6.09494	10.2806	5.52471	2.17158e-06	2.02614	up
gene-MMP17	44	63	80	62	40	70	51	50	36	38	148	81	82	98	130	84	121	85	203	112	0.261629	0.392965	0.483608	0.364286	0.219346	0.397242	0.279527	0.275643	0.197296	0.217313	0.811616	0.475581	0.472261	0.611292	0.633539	0.462927	0.74628	0.492945	1.04246	0.687596	6.00783e-07	1.17723	up
gene-KCNC4	380	1356	491	881	596	356	600	742	938	763	345	303	336	603	684	300	60	119	335	166	1.55686	5.84584	2.55089	4.15612	2.92858	1.6274	2.4832	3.60484	3.69643	3.30912	1.47253	1.91355	1.75657	3.28573	3.05544	1.48346	0.28931	0.525021	1.54415	0.768054	0.0164386	-1.07384	down
gene-TGM3	123	70	135	90	60	34	54	85	101	55	85	38	5	22	11	40	11	32	38	14	1.22218	0.746012	1.38366	0.892604	0.563663	0.320757	0.48748	0.80074	0.928444	0.522445	0.786452	0.366487	0.046186	0.22982	0.084984	0.366871	0.110751	0.298211	0.322129	0.139865	0.00222855	-1.38543	down
gene-SDC4	7670	7698	9789	3531	8380	7839	7096	6708	5682	4961	3965	1918	2084	5370	2965	2553	1725	1851	4482	817	80.7477	86.7836	104.953	37.1435	83.7028	78.8128	68.4849	67.4348	55.8901	50.3891	38.2423	19.8293	21.483	59.3905	25.5409	24.938	18.9376	18.9243	40.5776	8.82063	1.64162e-05	-1.22482	down
gene-EFR3B	245	143	302	206	305	103	192	335	261	229	39	63	64	34	37	48	36	72	81	76	0.983718	0.614523	1.23626	0.828698	1.16195	0.394256	0.705688	1.28538	0.981066	0.888945	0.140842	0.24822	0.250937	0.1414	0.119234	0.176327	0.147271	0.278524	0.280434	0.311458	9.77119e-18	-1.99225	down
gene-RASD1	733	1099	1192	673	584	637	674	355	721	512	269	612	273	216	430	399	139	219	386	342	12.9828	20.8539	21.512	11.9174	9.82182	10.7773	10.9443	5.99863	11.9401	8.75752	4.35494	10.6435	4.73582	4.00653	6.22429	6.56356	2.56594	3.76586	5.88264	6.20893	1.28187e-05	-1.08408	down
gene-PDGFRL	82	127	355	216	99	191	291	75	183	139	325	544	155	217	500	490	219	288	732	185	1.39865	2.33023	6.21488	3.69843	1.60501	3.13004	4.58455	1.22967	2.93834	2.29145	5.10835	9.1929	2.59914	3.91989	7.03644	7.8184	3.92921	4.80387	10.8175	3.2532	0.000377729	1.12328	up
gene-MYOD1	572	486	109	1191	280	123	894	160	214	428	1674	3057	2063	2023	2042	1952	2587	5435	3836	4523	8.15354	7.41159	1.58206	16.9679	3.78628	1.67197	11.6771	2.17326	2.84374	5.88375	21.8617	42.8236	28.8152	30.3098	23.8273	25.831	38.479	75.2995	47.0501	66.1536	3.45181e-09	2.77651	up
NewGene_288	121	177	133	121	138	420	294	89	194	88	14	66	97	68	39	164	28	17	50	30	0.649716	1.20128	1.00963	0.842887	0.834831	2.33081	1.77891	0.466014	1.28316	0.453122	0.066859	0.343019	0.50936	0.376638	0.164325	0.816979	0.307948	0.084975	0.228324	0.159456	0.000942784	-1.49025	down
gene-VEGFD	25	44	128	112	41	136	174	34	51	65	151	243	135	36	244	238	102	209	297	126	0.306104	0.615265	1.69967	1.44781	0.483258	1.69489	2.07444	0.405503	0.589184	0.80812	1.78698	3.1088	1.69134	0.482228	2.5981	2.8646	1.37834	2.6483	3.32593	1.67249	0.00150776	1.21969	up
gene-TLR5	37	22	57	40	14	22	60	31	14	16	44	55	51	31	21	75	65	53	122	77	0.380759	0.237467	0.591063	0.409288	0.136155	0.211363	0.564644	0.304347	0.127626	0.155949	0.410201	0.55282	0.508961	0.326801	0.17367	0.710662	0.692738	0.531955	1.08129	0.811953	0.0101746	1.02145	up
gene-B3GALNT2	2423	3029	3075	2643	2121	2075	2014	1588	2834	1243	669	873	1168	1038	1075	1084	975	931	1656	1219	26.5181	33.4609	35.8887	27.7882	21.0992	22.9339	20.2989	15.6692	29.1326	13.3897	6.73244	9.39917	12.1841	12.489	10.4759	10.445	12.1419	9.98108	14.9289	13.4781	1.43256e-07	-1.02652	down
gene-B3GALNT1	137	81	188	148	154	129	131	74	174	158	130	284	266	246	203	323	169	298	430	250	1.5235	0.970386	2.14125	1.65273	1.62675	1.37621	1.33981	0.786761	1.81075	1.69709	1.32679	3.12457	2.91285	2.88778	1.85173	3.34773	1.96529	3.23253	4.13451	2.86953	1.05849e-06	1.0142	up
gene-TNFSF10	246	154	241	369	65	104	235	189	247	289	519	587	215	102	289	331	515	990	396	581	5.14214	3.55334	5.22202	8.56596	1.46137	2.19492	4.75124	4.26993	5.15472	5.79589	10.3346	12.5238	4.77467	2.5514	5.03604	6.81415	11.9018	21.5012	7.15904	12.8904	0.00164983	1.15231	up
gene-FKBP5	7407	12737	19312	6796	10162	12381	9879	12015	14418	9204	2190	4945	6104	3309	3631	3319	3943	4116	3552	3900	51.2826	92.9243	135.561	47.1731	65.9218	81.5612	61.9548	78.7651	93.1296	61.4359	14.0404	33.8834	41.3542	24.1622	20.4532	21.3334	28.7246	28.0357	21.1219	27.711	2.70248e-13	-1.44096	down
gene-ANGPTL2	410	401	776	489	366	764	933	465	994	607	1853	1816	592	1144	1580	1251	1084	1776	2334	846	2.87613	3.0519	5.61234	3.50093	2.51251	5.15195	6.02955	3.1836	6.56946	4.17156	11.9361	12.5289	4.23065	8.47796	9.21296	8.20725	8.02645	12.1382	14.155	6.13253	2.05969e-09	1.28796	up
gene-PGR	43	66	47	48	66	98	58	53	73	46	35	25	19	17	23	9	12	27	29	40	0.331597	0.463826	0.399618	0.221726	0.40762	0.85346	0.307666	0.466085	0.607034	0.417824	0.242059	0.153362	0.119395	0.122328	0.107172	0.038292	0.056464	0.179602	0.173718	0.242594	8.06328e-06	-1.25795	down
gene-LHX6	60	52	138	94	60	107	79	70	127	34	124	417	114	200	303	229	126	333	204	107	0.501331	0.519263	1.46906	0.76632	0.517325	0.883231	0.591274	0.529252	0.924585	0.447357	1.54358	3.58725	0.961066	1.93181	2.14148	1.90888	1.09341	2.7728	1.46975	1.49008	3.63818e-07	1.45797	up
gene-GFPT2	1052	1168	995	530	915	606	1642	416	1904	466	324	367	198	292	420	919	164	305	1266	199	9.64448	11.4692	9.29462	4.85786	7.96432	5.30937	13.8103	3.64092	16.3162	4.11778	2.71955	3.30195	1.7753	2.80641	3.15176	7.82397	1.56881	2.71098	9.98643	1.87165	0.0177687	-1.06427	down
gene-TTC39C	624	325	343	237	385	219	318	284	291	275	83	167	108	133	163	151	123	173	144	146	4.07266	2.29586	2.24561	1.51706	2.3704	1.37789	1.86777	1.73211	1.77534	1.69886	0.482461	1.04863	0.676209	0.89209	0.848221	0.897216	0.821037	1.08463	0.810073	0.954065	1.49418e-08	-1.17718	down
gene-NPC1	921	1266	1081	1117	1589	1202	2513	1410	1429	1154	1310	492	375	841	449	345	328	381	689	428	5.69848	8.3888	6.81285	6.90542	9.32811	7.10215	14.2581	8.33232	8.25775	6.88998	7.42286	2.98816	2.26809	5.46614	2.27208	1.97751	2.11621	2.2862	3.66496	2.71383	9.14349e-06	-1.15554	down
gene-SLC25A5	633	454	404	232	655	249	562	506	716	393	398	198	172	189	185	157	236	159	276	154	14.7456	11.3187	9.58544	5.39236	14.4756	5.52154	11.9858	11.2491	15.5797	8.81601	8.49325	4.52197	3.92267	4.60886	3.5137	3.38222	5.72226	3.59096	5.52906	3.66764	1.5534e-05	-1.07371	down
gene-IL7R	140	48	129	33	60	20	221	51	98	50	21	83	46	7	19	50	21	42	73	14	0.806015	0.291855	0.753128	0.189646	0.32356	0.151617	1.1637	0.278913	0.527153	0.272549	0.108725	0.464551	0.25574	0.041504	0.089102	0.266743	0.124501	0.229434	0.359239	0.082069	0.0304568	-1.0997	down
gene-CLEC11A	5	20	49	46	30	42	24	17	37	17	49	78	36	43	74	39	53	80	91	41	0.09671	0.414103	0.958358	0.884551	0.538769	0.764499	0.413964	0.305634	0.665349	0.318555	0.859826	1.48592	0.674467	0.864104	1.17075	0.701398	1.06894	1.49381	1.51359	0.81645	0.000987131	1.10324	up
gene-NFKBIZ	780	262	201	146	292	233	270	125	529	231	167	146	74	82	190	109	78	183	226	111	5.93648	2.13124	1.55679	1.10994	2.11107	1.6899	1.88366	0.905225	3.7597	1.69446	1.16332	1.09147	0.54655	0.651882	1.18187	0.766877	0.618568	1.35462	1.47933	0.862619	0.000773151	-1.13526	down
NewGene_203	47	38	66	29	81	51	124	50	100	78	31	21	19	0	24	30	16	44	21	31	2.48582	2.13179	3.57094	1.51329	4.08092	2.58973	5.99769	2.51126	4.96875	3.95549	1.46698	1.05686	0.938805	0	1.00189	1.4319	0.8443	2.2518	0.931487	1.67624	0.000580532	-1.36517	down
gene-PPP2R2C	119	300	136	229	130	379	162	185	255	189	22	102	159	98	156	53	29	64	106	93	0.807115	2.17638	0.933481	1.54834	0.835679	2.46073	1.0104	1.20813	1.61279	1.23532	0.133587	0.675089	1.0522	0.700591	0.863426	0.327402	0.200594	0.447222	0.613419	0.645549	0.000997598	-1.17984	down
NewGene_10548	48	89	174	53	116	69	92	107	65	71	27	51	19	26	30	35	40	48	53	44	0.706061	1.40982	2.62638	0.774272	1.63263	0.967409	1.24668	1.51739	0.89567	1.00448	0.354272	0.7381	0.266163	0.400934	0.354533	0.477538	0.614597	0.681399	0.667149	0.65535	2.09015e-05	-1.15394	down
gene-F2RL2	470	579	901	250	497	174	671	267	737	410	410	174	74	129	378	237	226	235	269	138	4.3732	5.77407	8.55028	2.3288	4.39478	1.54286	5.73092	2.37309	6.41426	3.68813	3.49844	1.59334	0.674772	1.25697	2.88126	2.04604	2.19675	2.12828	2.15168	1.31744	0.00159948	-1.03586	down
NewGene_9858	92	307	956	358	249	1149	406	397	368	456	100	94	81	134	52	263	151	38	297	93	1.42209	5.24331	15.4547	5.69306	3.75532	17.4582	5.91007	6.03776	5.4574	6.97046	1.45118	1.45954	1.24489	2.22458	0.652113	3.84157	2.49062	0.560015	4.03203	1.49997	0.000274309	-1.74013	down
NewGene_9856	209	407	1107	494	360	1378	577	597	485	703	255	115	110	277	88	435	172	82	421	134	0.956432	1.99582	5.16517	2.26075	1.56355	6.02867	2.4219	2.61349	2.07445	3.10834	1.07035	0.516909	0.493858	1.32927	0.329538	1.84624	0.820251	0.364085	1.65621	0.62644	0.000113754	-1.47228	down
gene-HSP90B1	26147	6172	5590	7216	6119	4966	8648	4520	12447	6291	5086	3308	2449	4532	4067	2144	2968	4415	4084	2972	250.686	63.3602	54.5767	69.1207	55.664	45.4608	76.0076	41.3836	111.488	58.1955	44.6664	31.1505	22.9895	45.6393	31.9048	19.0709	29.67	41.1162	33.6682	29.2168	0.000755223	-1.22983	down
gene-RTN4RL1	80	34	161	166	110	183	219	69	88	215	142	471	313	335	336	297	233	139	398	173	0.599384	0.267367	1.23402	1.24442	0.783134	1.31425	1.50906	0.489063	0.613465	1.55634	0.978285	3.48171	2.30185	2.64666	2.06894	2.07027	1.82525	1.01122	2.57307	1.33409	9.87034e-05	1.2098	up
gene-DACH1	117	97	257	68	150	138	257	155	121	162	350	450	289	214	487	240	222	290	333	208	0.615906	0.544255	1.38668	0.353766	0.75105	0.690588	1.24063	0.77998	0.595977	0.820557	1.69874	2.34708	1.48887	1.18481	2.09948	1.17362	1.21953	1.48656	1.53108	1.12399	1.08115e-07	1.11284	up
NewGene_4747	262	119	954	999	243	713	552	537	145	575	736	1605	1534	1014	3224	1972	1863	1610	2874	3409	1.97813	0.643274	10.3858	4.36555	1.82627	5.53419	3.70886	2.10605	0.94581	4.01311	4.57836	12.7501	13.1569	4.27498	19.5805	14.8132	11.6546	8.44151	16.4408	25.7417	9.76023e-07	2.04543	up
NewGene_1999	853	1112	256	264	456	236	1000	430	285	243	351	183	289	213	270	226	203	273	231	176	28.6527	36.0013	9.66607	7.95906	14.8868	7.6567	31.0199	12.4721	9.5341	7.27008	11.1514	5.6151	8.86769	6.58987	6.92637	6.71954	6.25515	7.56186	6.12474	6.37202	0.00432813	-1.01569	down
NewGene_5198	184	88	202	137	140	203	99	187	206	211	156	415	426	337	365	253	515	516	274	244	1.05788	0.543583	1.19	0.980589	0.765013	1.11463	0.520019	0.903884	1.2126	1.11412	0.759073	2.20832	2.1316	1.92091	1.65458	1.19005	2.7322	2.8946	1.36057	1.4443	2.31587e-06	1.18823	up
gene-SIM2	98	103	86	109	57	78	29	169	144	80	76	46	61	58	81	15	5	34	39	13	1.30589	1.46345	1.15881	1.41359	0.610011	0.956582	0.309411	2.10123	1.78511	0.977197	0.894729	0.513832	0.7294	0.82034	0.830598	0.165863	0.053021	0.360518	0.42509	0.142556	0.0180522	-1.11047	down
gene-COL27A1	21	16	76	47	27	29	48	58	40	29	100	151	68	115	46	74	100	108	109	112	0.075005	0.05689	0.264268	0.157122	0.084184	0.090346	0.145845	0.185756	0.123515	0.093849	0.307039	0.497989	0.220872	0.410347	0.125	0.231344	0.353488	0.355331	0.316196	0.385186	7.15906e-07	1.4439	up
gene-RTN4R	49	66	73	108	136	103	153	60	119	101	26	42	30	73	78	11	21	29	85	26	0.67962	0.993067	1.03481	1.5033	1.80625	1.37769	1.96132	0.793883	1.56017	1.35896	0.328374	0.576904	0.412979	1.06444	0.885896	0.142207	0.305799	0.386279	1.02299	0.369946	0.0013495	-1.11475	down
gene-LTF	556	686	337	99	414	398	323	356	526	287	30	15	16	49	13	15	8	47	38	35	6.03848	7.7906	3.6613	0.992493	4.2429	3.83104	3.16548	3.43135	5.11278	2.99174	0.268434	0.141216	0.152601	0.511346	0.105235	0.139004	0.082612	0.457644	0.325765	0.359341	4.27174e-29	-3.82942	down
gene-ZNF274	349	574	445	457	806	610	655	461	528	512	185	235	125	182	185	212	174	215	283	231	3.48375	6.20534	4.57646	5.50338	7.7163	5.88364	6.04974	4.6235	4.97954	5.21647	1.77721	2.29945	1.22267	1.90738	1.53652	1.98074	1.93085	2.18303	2.56694	2.39156	1.51442e-21	-1.31932	down
gene-FERMT1	98	83	79	12	108	54	114	71	166	57	33	22	37	40	29	24	8	62	61	43	0.457456	0.41195	0.372869	0.053721	0.474304	0.244902	0.485369	0.316072	0.723572	0.256521	0.146491	0.100798	0.16542	0.191472	0.1104	0.101649	0.038279	0.277864	0.243958	0.203579	0.00537017	-1.13347	down
gene-TNFRSF6B	700	495	82	41	925	83	164	151	710	123	119	35	29	41	52	15	41	43	17	48	18.3263	13.8826	2.16703	1.05726	22.9927	2.07301	3.92942	3.76458	17.3637	3.10079	2.85093	0.895614	0.735403	1.10231	1.10549	0.358542	1.10607	1.08743	0.364581	1.26777	2.06792e-06	-2.88114	down
gene-CASZ1	271	401	289	491	507	691	641	423	131	661	732	1314	938	1018	1050	787	498	698	993	816	1.28269	1.67509	1.37808	1.79553	1.65685	2.68448	2.15245	1.90965	0.577443	2.28462	2.24605	4.57791	3.35206	3.97512	3.21838	2.49346	2.44584	2.54468	3.2906	2.79697	1.85549e-05	1.0609	up
gene-RAB40B	225	35	25	151	77	46	91	58	50	23	16	35	8	69	18	12	2	48	31	35	3.4595	0.563949	0.388612	2.31197	1.11994	0.668561	1.28392	0.847463	0.71513	0.340467	0.212848	0.520262	0.119221	1.11213	0.223399	0.165169	0.032138	0.711054	0.399332	0.542335	0.012719	-1.46171	down
gene-RUNX1	3584	855	924	438	967	335	418	297	755	268	211	195	85	1127	195	198	192	266	304	142	16.9239	4.33941	4.41674	2.09644	4.28951	1.5178	1.77151	1.31059	3.26618	1.19696	0.910313	0.893246	0.384826	5.56854	0.736665	0.849372	0.923667	1.23328	1.20934	0.6664	0.0221098	-1.5178	down
gene-ADCY10	62	39	58	36	65	81	79	48	57	79	42	9	6	17	7	16	7	30	34	13	0.284859	0.190886	0.268212	0.165249	0.280653	0.355832	0.330194	0.210724	0.243418	0.350392	0.176981	0.036673	0.02617	0.079914	0.023469	0.067733	0.031192	0.131861	0.133579	0.060122	8.94985e-06	-1.64202	down
gene-PRG4	1090	731	161	81	493	310	815	206	2000	265	221	46	16	80	74	51	69	75	41	30	6.39723	4.8042	0.951638	0.431215	2.77539	1.68088	4.29394	0.991131	10.4292	1.35561	1.00998	0.223859	0.073751	0.415778	0.300693	0.285789	0.377364	0.360178	0.209378	0.151453	3.16603e-07	-3.01172	down
gene-TAGAP	34	48	55	67	58	49	125	58	67	56	94	161	94	92	77	95	103	147	208	151	0.28807	0.440881	0.47822	0.572685	0.468345	0.403514	0.987315	0.472663	0.539381	0.464073	0.738761	1.36214	0.799262	0.833855	0.537446	0.760649	0.91924	1.22519	1.54748	1.32626	1.55954e-06	1.0854	up
gene-LIMD2	64	202	199	91	214	352	240	465	371	237	106	133	104	92	39	74	38	85	103	60	1.27243	4.27366	4.01393	1.73132	4.06657	6.63768	4.366	8.7881	6.77871	4.55781	1.93553	2.63637	1.989	1.90433	0.582841	1.38471	0.758587	1.65823	1.7475	1.23182	1.33606e-05	-1.44667	down
gene-AOC2	134	164	103	114	394	202	324	115	176	187	76	111	61	92	83	70	75	72	111	70	1.335	1.75884	1.04726	1.13754	3.74041	1.92735	2.97594	1.09937	1.64683	1.80303	0.690064	1.08446	0.596328	0.961078	0.678776	0.647218	0.781639	0.69202	0.948616	0.713515	3.37725e-06	-1.10519	down
gene-SLC7A5	142	88	93	62	103	47	120	35	138	24	69	18	45	40	41	16	14	20	75	27	0.987367	0.650814	0.658569	0.42652	0.678697	0.311402	0.763889	0.22701	0.894073	0.159353	0.434954	0.119651	0.300661	0.286099	0.229924	0.099653	0.099365	0.134341	0.445438	0.189335	0.00777637	-1.13866	down
gene-SLC7A8	562	2089	2628	1923	1176	7332	2748	3299	3751	2667	923	919	377	710	350	557	722	329	1196	432	3.82601	15.3184	18.2454	12.6778	7.353	50.0486	17.8753	22.1053	25.2079	17.4156	5.89643	6.02012	2.46955	5.00898	2.02017	3.43031	5.21061	2.1942	7.30119	3.07729	4.55409e-07	-2.0122	down
gene-CCL21	47	81	126	49	19	10	240	12	57	65	163	214	82	69	134	228	60	203	311	112	1.44154	2.67494	3.97702	1.52286	0.560844	0.267459	6.83125	0.345355	1.65221	1.92991	4.62432	6.5304	2.47998	2.2476	3.39802	6.56066	1.92098	6.11522	8.31429	3.56489	0.0128303	1.25256	up
gene-DACT3	17	28	71	34	17	34	26	36	28	44	44	121	39	47	74	43	64	69	74	68	0.152911	0.285866	0.688731	0.324096	0.14636	0.309611	0.221416	0.325281	0.244461	0.400222	0.380712	1.1305	0.363873	0.465404	0.571464	0.37639	0.631603	0.635994	0.600677	0.661438	0.000642027	1.01173	up
gene-KLF5	3030	520	699	444	693	323	707	279	634	546	421	231	300	317	168	268	252	622	364	664	24.4351	4.48433	5.73737	3.57464	5.29552	2.482	5.22386	2.14282	4.77493	4.24641	3.10568	1.82979	2.36484	2.68043	1.10748	2.00393	2.11397	4.87174	2.51777	5.48943	0.0397217	-1.06256	down
gene-TRIM2	1133	448	657	723	478	488	687	358	493	732	405	1238	1223	974	1510	1355	1221	1495	1646	1889	3.93514	1.66576	2.32143	2.50562	1.57323	1.6154	2.5962	1.18476	1.59816	2.44979	1.2879	4.22196	4.16378	4.16719	4.29434	4.36653	4.41856	5.04025	4.91188	6.72454	5.46921e-06	1.14005	up
gene-LOC787269	4930	1882	3779	4384	2169	1569	1481	1169	4364	3563	657	296	320	289	407	1180	346	936	769	892	53.6845	21.9376	41.904	47.702	22.4044	16.3077	14.7789	12.1546	44.3962	37.4295	6.54856	3.1603	3.41214	3.3014	3.62029	11.917	3.92787	9.90025	7.19749	9.95301	1.17426e-08	-2.18623	down
gene-LOC100337457	1963	2603	2624	2012	2236	1234	2982	2331	1584	1965	1478	2284	530	416	721	899	824	982	1275	920	13.1766	18.8279	18.0608	12.8987	14.2109	7.99454	18.322	14.5953	9.90593	12.8854	9.21493	14.1956	3.46763	3.10105	4.13752	5.58694	5.53813	6.05141	7.44712	6.1852	3.98455e-05	-1.00673	down
gene-MEDAG	2079	1381	2361	813	1328	1496	2101	862	2350	676	647	1040	466	461	894	995	362	523	1478	387	26.0002	18.4899	30.0657	10.152	15.7479	17.8566	24.0781	10.2912	27.449	8.14671	7.40393	12.7697	5.70021	6.05384	9.13926	11.5454	4.72077	6.3476	15.8915	4.95802	0.000231955	-1.0358	down
gene-PEG3	908	319	232	214	419	186	344	212	209	215	85	142	96	106	112	125	61	122	210	97	2.18864	0.822181	0.569249	0.513725	0.958804	0.427227	0.76051	0.488337	0.470299	0.498969	0.18757	0.336495	0.226429	0.266677	0.219516	0.279366	0.153414	0.285827	0.435336	0.237758	2.59996e-06	-1.46262	down
gene-MXRA8	59	209	828	502	93	485	582	177	255	292	434	1406	492	995	1074	810	466	777	1320	552	0.691135	2.64573	9.97464	5.93777	1.0433	5.47856	6.31597	1.99419	2.81852	3.3289	4.70174	16.3466	5.69834	12.3707	10.4004	8.89365	5.75263	8.93208	13.4391	6.70139	0.00205235	1.34503	up
gene-CNGA3	11	7	64	8	30	27	53	16	8	28	104	70	66	52	126	65	34	77	86	74	0.068171	0.044766	0.426492	0.052644	0.188127	0.167281	0.322085	0.101182	0.04385	0.177063	0.637457	0.450878	0.433905	0.367726	0.689728	0.404706	0.238766	0.490581	0.493119	0.506768	1.04691e-05	1.70708	up
gene-SLC25A22	188	98	66	73	177	64	137	40	191	93	81	53	17	77	54	18	34	48	84	29	1.96916	1.09655	0.697673	0.665617	1.7999	0.640815	1.31038	0.392364	1.86983	0.815862	0.776412	0.539642	0.174217	0.885129	0.452734	0.152333	0.316259	0.482842	0.748675	0.304187	0.00408542	-1.10578	down
gene-BHLHE41	1131	658	1067	832	952	1599	991	952	518	1902	1119	2273	1892	1301	2242	2821	2025	2408	2291	2719	8.78439	5.4724	8.43626	6.45463	7.01431	11.8581	7.05706	7.06215	3.75357	14.2511	7.95939	17.3418	14.3966	10.6108	14.2471	20.3346	16.4896	18.1701	15.3022	21.6568	1.72589e-06	1.08567	up
gene-DTX1	179	157	255	121	89	159	200	47	149	131	379	339	144	228	277	309	149	335	607	235	1.22605	1.29095	1.87415	0.82614	0.690637	1.06925	1.39117	0.305595	0.973502	0.910685	2.41038	2.32332	0.969298	1.75103	1.63784	1.97105	1.13616	2.25108	3.65531	1.92585	0.000111501	1.07351	up
gene-MAFF	7308	11587	9468	4976	13809	8156	16333	12491	16168	11459	9207	2133	2766	6837	4734	2487	1724	2086	2394	1469	88.2534	150.269	119.789	60.0356	158.229	97.5099	181.482	144.53	182.415	138.969	105.662	25.2958	32.7081	87.0105	46.7725	27.8615	21.695	24.4668	24.8585	18.1882	0.000105541	-1.50449	down
gene-NAMPT	2710	4748	6576	2807	3048	2752	2883	3873	4470	3339	1675	2458	1583	1159	1690	1935	1912	1602	1413	2016	14.4323	27.1225	35.8207	14.9359	15.3461	14.0105	14.1722	19.6616	22.2739	17.1412	8.21879	12.8281	8.22245	6.45998	7.33559	9.54517	10.6671	8.31633	6.4869	11.0346	1.69752e-07	-1.00056	down
gene-IRS1	4056	1919	4093	3029	2500	6169	2824	3868	2422	3580	2133	8554	5976	5769	8702	7402	6212	4217	9884	8681	11.4858	5.81867	11.8029	8.56984	6.71812	16.6829	7.3313	10.4613	6.40638	9.78204	5.53248	23.7977	16.5749	17.1625	20.1639	19.4491	18.3467	11.6016	24.0693	25.2133	2.55128e-05	1.04489	up
gene-IRS2	3069	1464	2381	1318	2763	1889	2253	1238	1904	2003	703	795	498	853	1122	962	502	545	821	264	11.6971	5.97449	9.24017	5.01977	9.98984	6.87352	7.87078	4.50637	6.77796	7.36396	2.45255	2.97611	1.85794	3.41379	3.49903	3.39949	1.99402	2.01552	2.68917	1.0319	4.36316e-11	-1.43661	down
gene-DOC2G	110	470	184	139	564	248	290	288	377	222	133	120	61	50	119	87	135	62	113	179	1.8856	8.56023	3.16334	2.34107	9.05553	3.94564	4.53363	4.62185	6.11997	3.64585	2.06133	1.97407	1.00146	0.837219	1.65388	1.33973	2.36704	1.00766	1.62944	3.03985	1.93085e-05	-1.35041	down
gene-TCF15	65	105	267	222	199	331	396	196	243	322	630	748	329	343	850	775	303	365	525	329	1.64023	2.83286	6.8946	5.62897	4.79035	8.01064	9.20469	4.75377	5.74875	7.88278	14.6421	18.6529	8.17094	9.15297	17.6654	18.2557	8.02357	8.99369	11.4561	8.54984	4.11592e-06	1.24961	up
gene-PLIN2	5467	1980	1928	1364	2334	1162	1850	995	1594	1018	1253	963	415	772	610	495	772	1089	1060	505	83.7186	32.5032	30.0913	20.8956	33.7403	16.962	25.9379	14.4746	22.7869	14.8695	17.5838	14.4786	6.19003	12.4014	7.64517	7.04545	12.3393	16.1601	13.9545	7.87063	8.4536e-05	-1.26106	down
gene-CD163	821	821	1396	262	410	555	2405	218	1480	147	76	303	41	82	163	215	85	252	384	107	5.80517	6.20606	10.0551	1.84405	2.74456	3.74606	15.5749	1.4656	9.77618	0.996073	0.489362	2.10728	0.282847	0.60338	0.937797	1.40608	0.621254	1.72453	2.33501	0.768734	1.72635e-05	-2.24854	down
gene-AHNAK2	22	7	83	51	66	85	61	75	55	36	81	65	84	107	79	153	48	71	245	127	0.03239	0.009622	0.125373	0.074526	0.092713	0.120429	0.082411	0.105184	0.07604	0.050287	0.109443	0.094233	0.121718	0.166719	0.094956	0.210635	0.074394	0.101683	0.313139	0.193707	0.00547173	1.07837	up
gene-CYGB	158	132	245	188	152	79	212	207	163	193	510	728	302	277	354	449	314	420	470	361	2.15059	1.94807	3.45499	2.5908	2.00235	1.03455	2.67233	2.72761	2.09584	2.56367	6.45396	9.88109	4.08226	4.00169	4.00243	5.77099	4.50282	5.5989	5.58157	5.078	3.18452e-13	1.35284	up
NewGene_9030	106	49	134	63	47	76	60	175	79	285	25	45	24	34	66	10	22	143	44	57	1.48728	0.679101	1.86482	0.820664	0.56172	1.05301	0.766504	2.29921	1.04041	3.89177	0.285146	0.588435	0.2996	0.458453	0.714807	0.122396	0.298585	1.88017	0.554527	0.798352	0.0175713	-1.1423	down
gene-CRELD2	508	578	391	522	638	429	839	436	875	380	267	237	199	256	309	142	171	192	323	147	9.97721	12.1521	7.80969	10.2295	11.8897	8.04489	15.0974	8.17877	16.0553	7.19354	4.79072	4.56191	3.81187	5.27243	4.96176	2.58012	3.49087	3.66258	5.44288	2.96168	3.05766e-11	-1.22994	down
gene-PLEKHH3	166	233	168	329	171	291	401	130	153	325	440	1617	1396	484	480	664	725	386	1297	1301	1.6269	2.31402	1.655	3.14369	1.52834	2.61358	3.43777	1.17445	1.26395	2.98135	3.82823	15.0934	13.0372	4.83379	3.79355	5.87606	7.34403	3.62421	10.4451	12.6623	1.51789e-11	1.98532	up
gene-LOC508916	185	449	368	221	259	683	336	241	556	199	38	308	54	167	99	232	82	45	238	123	2.44414	6.48314	5.02008	2.92746	3.31956	8.89722	4.09016	3.07947	6.97647	2.58726	0.477406	4.08243	0.701999	2.38631	1.06695	2.8673	1.20947	0.604905	2.72822	1.71961	0.00105679	-1.2728	down
NewGene_7337	68	55	46	26	141	37	167	91	55	61	49	0	13	35	2	9	20	2	33	9	0.591071	0.605335	0.477049	0.246985	1.48459	0.221739	1.14152	0.541689	0.431243	0.547021	0.629012	0	0.07816	0.307933	0.022708	0.08836	0.150409	0.011782	0.176825	0.054526	0.00204095	-1.94134	down
gene-LOC407145	128	72	117	111	102	103	84	94	84	100	29	547	173	120	231	206	243	203	173	299	0.843345	0.508897	0.786966	0.728514	0.637209	0.647798	0.505575	0.588698	0.514925	0.636124	0.173836	3.55039	1.11597	0.831571	1.24706	1.2612	1.67518	1.29989	0.982067	2.02553	0.000246086	1.2207	up
gene-TMEM86A	76	77	121	133	186	98	308	47	139	117	48	93	13	37	31	88	47	52	102	60	1.05084	1.15092	1.71155	1.84917	2.46439	1.30701	3.94106	0.625806	1.81397	1.57821	0.608654	1.27177	0.176545	0.540219	0.343929	1.12955	0.672713	0.701473	1.2245	0.859988	0.00254052	-1.07583	down
gene-TIPARP	6124	4711	4849	1262	4133	3554	2279	3372	6386	2580	734	1059	1029	1450	969	602	846	854	1257	735	42.7371	35.2035	34.4594	8.79397	27.3631	23.6841	14.5779	22.4707	41.6337	17.3731	4.68715	7.25711	7.03251	10.6264	5.52945	3.89451	6.15153	5.78748	7.53798	5.254	6.12942e-15	-1.95755	down
gene-EGLN3	5009	8685	5351	4398	3998	5497	2569	2925	3292	3299	1571	3755	1965	1536	3741	1534	1166	1847	3179	1914	65.8741	122.321	71.672	57.7976	49.8859	69.0386	30.973	36.7405	40.4462	41.8665	18.922	48.5106	25.304	21.2205	40.2545	18.7162	15.9865	23.5889	35.955	25.809	9.71866e-05	-1.01336	down
gene-LOC101903647	17	18	70	21	24	24	37	36	22	45	31	143	66	64	45	92	92	98	67	95	0.079901	0.094488	0.353909	0.101328	0.111993	0.111719	0.170666	0.170288	0.102958	0.223048	0.143533	0.743449	0.325119	0.332222	0.183573	0.419947	0.529011	0.485643	0.287433	0.496021	8.75751e-06	1.45235	up
gene-LOXL4	802	620	605	416	397	656	657	329	1086	272	468	313	148	301	402	185	150	218	335	196	6.00396	4.91478	4.55254	3.07272	2.81415	4.63281	4.47607	2.39538	7.5366	1.92855	3.16133	2.25634	1.07152	2.3342	2.41777	1.25855	1.14861	1.56221	2.12779	1.5087	0.000174459	-1.03516	down
gene-RBM14	2935	3507	2483	2667	4306	2248	4518	2381	3008	2668	1608	1312	807	1667	1436	1124	988	1113	1889	1407	27.8633	35.6477	23.7966	25.0092	39.135	20.2133	39.3705	21.5804	26.651	24.5938	13.8909	12.284	7.45437	16.4566	10.9579	9.83456	9.69754	10.2465	15.3252	13.691	4.29479e-12	-1.10855	down
gene-XIRP1	163603	112198	90818	61679	90568	29996	101110	57774	98660	76814	84941	8037	9794	69402	22894	24321	13858	53065	18940	9139	718.321	515.038	404.901	271.053	367.715	125.04	405.464	236.355	405.006	317.622	343.84	34.5156	41.0348	320.747	80.1732	98.2598	61.8642	220.989	69.6484	40.1518	0.019445	-1.37995	down
gene-STAC	118	97	161	71	92	201	171	126	125	61	280	336	148	244	261	239	212	214	303	128	1.21669	1.07386	1.70842	0.825492	0.902195	2.05382	1.67472	1.24583	1.23796	0.598761	2.7076	3.44932	1.52304	2.76994	2.29426	2.29976	2.31846	2.15763	2.74597	1.43044	3.10843e-06	1.04094	up
NewGene_13913	374	100	61	43	113	84	211	100	216	230	14	6	8	90	10	11	27	4	43	2	1.18926	0.357184	0.19538	0.135798	0.339498	0.252524	0.824709	0.310794	0.958883	1.02941	0.038861	0.01873	0.024872	0.299133	0.026059	0.03223	0.089658	0.012334	0.115937	0.006511	5.79222e-06	-2.69008	down
NewGene_1184	182	73	74	91	133	59	68	90	83	164	242	248	298	206	354	189	366	153	140	151	3.00279	1.28274	1.23779	1.50447	2.08191	0.932382	1.02675	1.42549	1.28356	2.62264	3.66362	4.03758	4.82821	3.58013	4.79332	2.9038	6.32731	2.45391	1.98995	2.56584	7.75361e-06	1.30724	up
gene-REM1	80	172	322	122	186	430	344	231	207	252	745	840	589	441	763	698	654	577	929	364	1.38269	3.30895	5.80581	2.23035	3.12512	7.28067	5.62227	3.98086	3.45457	4.31423	12.1263	14.7352	10.3689	8.3323	11.2192	11.493	12.1112	10.0897	14.3531	6.66883	2.52454e-12	1.59747	up
gene-TNFAIP6	380	532	257	119	323	136	364	123	1171	172	126	113	65	86	146	133	56	93	236	54	8.63319	13.2294	5.92272	2.69137	7.26096	3.17256	7.69547	2.49714	25.0236	3.607	2.54318	2.74199	1.42255	2.14783	2.79719	2.75461	1.34731	2.1408	4.64726	1.22802	4.65031e-05	-1.63419	down
gene-SSC5D	49	71	139	159	65	156	206	53	80	98	141	281	100	270	366	297	97	235	361	149	0.239905	0.372347	0.704052	0.795604	0.309921	0.743968	0.941909	0.250336	0.37441	0.473293	0.644635	1.38482	0.488224	1.41955	1.51574	1.37926	0.502072	1.14336	1.55556	0.758993	0.000155129	1.17478	up
gene-DEDD2	1528	726	407	836	1020	670	983	566	769	758	462	479	263	399	633	324	291	266	535	281	21.427	10.8908	5.80276	11.7028	13.5706	8.96563	12.63	7.57543	10.0668	10.2559	5.92621	6.58602	3.61236	5.8651	7.26141	4.20605	4.2442	3.61315	6.44552	4.03671	1.00026e-05	-1.01605	down
gene-RRAD	69511	38069	46143	33995	35768	19622	24311	18040	34705	27360	13736	10550	6444	20584	8242	9456	6903	15215	17468	9615	1295.24	759.594	875.6	632.918	632.376	349.127	415.256	321.021	604.153	491.934	234.454	193.108	117.59	402.882	125.658	163.47	134.146	275.391	279.874	183.734	1.79597e-05	-1.48683	down
gene-PPARD	820	1510	768	581	1004	705	1166	737	1097	741	671	480	281	697	440	310	247	141	383	309	6.65404	12.8725	6.32104	4.67504	7.66277	5.38696	8.66354	5.66659	8.24844	5.7831	4.93778	3.8237	2.2453	5.92385	2.91062	2.31775	2.07156	1.09357	2.66134	2.54183	6.4401e-05	-1.11061	down
gene-ALB	81	116	109	117	115	108	125	100	80	134	873	138	105	157	530	78	100	106	141	117	1.05035	1.61136	1.43906	1.51795	1.41506	1.34353	1.48628	1.237	0.967471	1.68197	10.421	1.76336	1.34005	2.13808	5.64612	0.941578	1.34755	1.33332	1.58036	1.55746	0.00712318	1.18735	up
gene-CD248	108	227	285	225	180	255	559	158	386	175	451	603	171	507	691	832	317	458	1399	365	1.08758	2.44396	2.92257	2.26752	1.71698	2.45086	5.1638	1.52077	3.62872	1.69778	4.16332	5.96883	1.68604	5.37231	5.69718	7.78467	3.33198	4.47943	12.1337	3.76712	4.44908e-05	1.26039	up
gene-BMPR1B	148	68	144	121	96	105	50	123	186	137	111	209	257	219	228	232	225	163	364	243	0.787885	0.33209	0.788526	0.551221	0.415852	0.455961	0.208282	0.537665	0.944266	0.603897	0.46372	1.125	1.24996	1.18607	1.02872	1.07196	1.29782	0.725671	1.6899	1.32049	5.28987e-05	1.02115	up
gene-MTHFD1L	724	424	191	84	424	151	257	117	507	188	128	100	47	103	112	68	100	111	115	130	5.50837	3.45393	1.47507	0.633183	3.05677	1.09252	1.78962	0.85011	3.60286	1.37553	0.891286	0.742636	0.343341	0.818914	0.696616	0.477757	0.792716	0.817346	0.746711	1.00819	3.16472e-05	-1.53061	down
gene-SHISA3	299	176	374	229	154	122	307	217	536	134	77	72	142	194	81	30	42	138	64	100	4.58485	2.8873	5.8344	3.50764	2.23653	1.77482	4.31799	3.18117	7.68321	1.9758	1.07735	1.07394	2.12524	3.12272	1.00643	0.426933	0.666695	2.04685	0.839217	1.56648	0.000404943	-1.30307	down
gene-AMOT	3332	1514	1446	1799	1374	1108	2566	1528	1556	1463	4780	3142	3330	3207	3244	3880	4193	3206	4753	4014	11.6328	5.65484	5.16296	6.82842	4.55223	4.7196	8.74783	6.30324	5.11927	5.1344	15.3994	11.4747	11.3725	12.038	10.0323	12.6331	15.6144	11.0209	15.3971	15.4677	6.91996e-09	1.18579	up
gene-SERTM1	111	84	422	177	211	127	124	138	190	121	83	106	18	108	45	51	56	45	198	31	0.871313	0.751945	3.38583	1.38441	1.5889	0.980378	0.893333	1.03027	1.4222	0.91415	0.595702	0.811808	0.134281	0.890823	0.285566	0.366162	0.45205	0.337858	1.37557	0.881383	0.00409404	-1.12599	down
NewGene_8567	55	6	20	4	5	101	31	6	37	17	31	51	79	58	46	218	84	12	107	63	0.399379	0.039647	0.142334	0.029595	0.035083	0.709481	0.210332	0.040167	0.254165	0.119944	0.210056	0.357986	0.56012	0.444319	0.268982	1.5009	0.646067	0.083633	0.677694	0.477029	0.0175914	1.54166	up
gene-COL21A1	56	43	185	67	57	210	140	60	93	64	223	181	243	254	229	177	235	210	332	180	0.357994	0.295136	1.22063	0.42771	0.34535	1.28015	0.81726	0.364787	0.552439	0.394567	1.3066	1.17213	1.52806	1.7164	1.1952	1.05157	1.56895	1.30821	1.84534	1.18137	1.58097e-06	1.34802	up
gene-FBXL22	58	92	111	129	123	105	94	117	54	49	107	189	153	88	288	176	207	207	237	251	1.1165	1.923	2.2045	2.52131	2.27932	1.95906	1.68677	2.17962	0.978699	0.922192	1.90926	3.61913	2.92542	1.7893	4.61259	3.18811	4.20706	3.93148	3.98831	5.03632	8.997e-06	1.10451	up
gene-LOC781423	322	439	231	208	139	320	112	205	127	163	52	39	0	77	2	17	0	21	70	27	4.39943	6.41392	3.19279	2.81883	1.79485	4.17583	1.38899	2.70433	1.60503	2.15083	0.646458	0.508631	0	1.08837	0.022294	0.203175	0	0.271208	0.811911	0.372722	0.000167441	-2.86793	down
NewGene_433	65	51	71	35	37	78	79	46	12	87	64	134	78	21	73	292	198	39	146	26	0.493319	0.415361	0.55544	0.264845	0.508137	0.832566	0.730153	0.843153	0.097565	0.69298	0.524003	1.01667	0.589607	0.483118	0.538004	2.16198	1.59898	0.288507	0.976299	0.509399	0.0436745	1.04226	up
gene-PCK1	43	36	62	31	41	64	42	22	38	38	108	54	39	98	30	108	68	59	576	67	0.441512	0.39219	0.644967	0.313993	0.400898	0.624948	0.394481	0.209371	0.363385	0.37199	1.02118	0.546713	0.387935	1.05783	0.24871	1.02984	0.728845	0.590678	5.12783	0.70712	0.000887667	1.55971	up
gene-SLC46A2	20	124	180	44	98	65	195	106	104	79	31	17	11	46	44	26	16	17	24	28	0.232361	1.54711	2.13394	0.511242	1.08451	0.722454	2.08825	1.17721	1.1286	0.885558	0.323784	0.190262	0.115855	0.556306	0.415337	0.277525	0.194026	0.190269	0.233733	0.330752	9.73072e-07	-1.83625	down
gene-LOC112442278	34	599	50	168	962	117	240	118	231	75	44	47	9	40	147	43	32	19	46	38	0.315507	6.02829	0.476511	1.57044	8.58351	1.04228	2.06227	1.0569	2.02663	0.675912	0.378314	0.431704	0.079314	0.394738	1.12413	0.372358	0.311575	0.169512	0.371652	0.358545	0.000108694	-2.4336	down
gene-FZD8	460	345	639	457	578	2735	827	1484	1595	1018	448	463	223	194	331	274	249	382	595	231	3.44408	2.76735	4.87682	3.41763	4.1082	19.5713	5.67979	10.6218	11.1678	7.36228	3.07087	3.40441	1.63547	1.52229	2.02486	1.90037	1.94515	2.78154	3.83344	1.77434	5.78303e-06	-1.50506	down
gene-FZD5	216	151	126	84	165	56	86	52	109	72	49	47	21	57	29	26	12	37	35	47	0.842667	0.624096	0.483506	0.318128	0.593838	0.200825	0.296625	0.188108	0.383738	0.263553	0.169563	0.173798	0.076902	0.225517	0.088826	0.089924	0.047514	0.134789	0.112547	0.18192	5.59347e-06	-1.56497	down
gene-DIO2	525	380	224	72	134	355	362	291	520	266	95	57	70	28	116	13	56	110	54	41	2.21276	1.7169	0.960127	0.302667	0.535909	1.42658	1.39682	1.17049	2.04948	1.08054	0.364795	0.235302	0.287679	0.122602	0.398204	0.049854	0.245382	0.449006	0.195381	0.173799	1.5524e-09	-2.23152	down
gene-VCAM1	145	118	318	154	76	123	256	64	127	120	396	524	206	173	488	307	194	305	667	225	1.51689	1.34671	3.36627	1.60143	0.750111	1.21993	2.44354	0.637963	1.24547	1.20277	3.78383	5.37849	2.08068	1.91527	4.13286	2.95623	2.09321	3.07267	6.00805	2.40504	8.7505e-06	1.27215	up
gene-FAM110C	303	438	587	237	1088	378	383	421	1371	453	176	170	164	110	223	130	142	211	146	172	1.79709	2.7839	3.54781	1.40454	6.12875	2.14362	2.08032	2.38654	7.60358	2.59657	0.955241	0.989369	0.948768	0.685899	1.0796	0.713553	0.87782	1.2157	0.74483	1.04777	5.55112e-10	-1.66529	down
gene-MKL1	1043	559	771	960	788	969	1092	748	655	857	1549	2512	1632	1760	1666	2448	2572	1056	3325	2944	6.17645	3.54753	4.59962	5.697	4.3891	5.44697	5.90079	4.32901	3.5819	4.97467	8.55323	14.7866	9.61886	11.0876	8.1529	13.6333	16.0063	6.15145	17.3261	17.8587	5.27783e-14	1.44351	up
gene-HMOX1	7129	4157	5479	2516	5703	7305	7550	5205	4884	3560	2086	2422	517	1596	707	743	713	1022	987	1144	122.011	76.1769	95.499	43.021	92.6058	119.385	118.459	85.0783	78.0847	58.7895	32.7062	40.7146	8.66626	28.6907	9.89829	11.7976	12.7099	16.981	14.5261	20.0676	1.2201e-15	-2.07298	down
gene-KCNE4	239	79	184	45	107	172	119	66	86	129	69	71	44	42	20	46	22	60	140	34	2.4161	0.850054	1.89527	0.446561	1.02959	1.66581	1.10566	0.636993	0.813969	1.25845	0.634996	0.703919	0.430256	0.440268	0.162312	0.426792	0.232062	0.590517	1.22074	0.348995	0.00344019	-1.1126	down
gene-FRMD4B	68	52	164	67	69	86	179	37	138	90	114	166	116	71	267	224	134	126	366	232	0.289379	0.243638	0.714358	0.285652	0.278861	0.349264	0.725128	0.148814	0.550407	0.372462	0.444943	0.715708	0.486641	0.319501	0.93665	0.887284	0.598993	0.524751	1.35048	1.02044	0.00102335	1.03101	up
gene-HSPA5	57293	13589	9567	10715	12535	10258	13636	10359	14309	9632	6389	4986	5336	8477	8495	5137	4036	5409	8607	4426	612.854	156.174	104.112	115.021	127.403	104.725	133.636	105.85	143.288	99.0587	62.6235	52.7548	55.9757	95.2149	74.0141	50.9442	45.4962	56.8462	79.9511	48.1146	0.000540084	-1.36629	down
gene-EEPD1	1157	1292	1114	1229	1547	933	1545	1142	1166	978	2790	3517	2768	2619	4191	2179	1610	1649	2500	2337	11.3057	13.5088	11.0633	11.9775	14.3131	8.67599	13.8236	10.6365	10.6489	9.21563	24.9491	33.7502	26.4761	26.9071	33.4886	19.7743	16.4022	15.629	20.9761	23.397	1.66721e-15	1.19173	up
gene-PRDM1	127	130	295	91	248	81	168	108	193	199	85	102	28	40	31	71	67	67	115	79	0.596522	0.631672	1.5915	0.420986	1.27266	0.40673	0.812433	0.466448	0.976496	0.878513	0.369276	0.46438	0.123618	0.195906	0.114508	0.299736	0.326964	0.307277	0.519823	0.421306	8.75945e-05	-1.16068	down
gene-CA12	266	475	281	151	486	41	315	235	234	1091	38	49	34	22	145	31	69	36	23	46	1.72054	3.21479	1.74616	0.965009	2.94597	0.230424	1.7979	1.36213	1.38385	6.6171	0.20619	0.285772	0.197758	0.136497	0.753943	0.172971	0.430808	0.205801	0.117648	0.281497	9.9425e-11	-2.78599	down
gene-LRRC8B	689	338	332	188	225	219	275	145	325	190	265	83	120	134	79	122	84	195	181	56	2.80233	1.46931	1.3741	0.760763	0.865987	0.850857	1.02327	0.562382	1.23468	0.741509	0.986129	0.330061	0.477216	0.569241	0.25987	0.459478	0.354206	0.766248	0.632919	0.230995	0.00216799	-1.07923	down
NewGene_9067	1001	2862	2967	1134	1544	2889	2619	2681	2452	2052	226	1134	665	595	703	680	699	802	607	968	3.93106	16.5344	15.27	4.95227	10.5365	11.8587	10.9647	13.1203	9.02894	8.01337	0.947142	5.80792	2.88899	2.60693	2.25618	3.41125	3.43969	3.94212	1.96333	5.09727	1.98765e-10	-1.55554	down
NewGene_11660	197	170	37	50	214	97	137	90	114	66	42	32	53	37	46	80	34	40	52	43	1.30629	1.20559	0.249703	0.329466	1.34282	0.680123	0.833577	0.614883	0.704592	0.419004	0.25385	0.203823	0.343637	0.255753	0.344406	0.491031	0.229316	0.253969	0.292978	0.286292	0.000294361	-1.26329	down
gene-H2AFX	621	469	285	379	708	368	484	246	429	302	168	284	168	158	236	173	147	157	290	158	12.574	10.1812	5.86574	7.67679	13.6173	7.1222	8.99428	4.75775	8.10864	5.90212	3.10502	5.64142	3.33379	3.3454	3.91134	3.25297	3.09924	3.0844	5.04746	3.28306	7.64348e-08	-1.08292	down
gene-TENT5C	9078	2592	994	2150	2134	1699	2357	1333	1942	2107	1597	633	848	1103	1070	413	702	923	1989	801	42.3088	12.9003	4.69616	9.97095	9.47304	7.52884	10.0329	5.90749	8.42138	9.50267	6.7999	2.8846	3.85697	5.37112	4.06408	1.78258	3.4233	4.17354	8.0018	3.81329	0.00224829	-1.36447	down
gene-SLC30A3	525	350	344	264	408	270	544	247	640	247	126	70	95	146	150	93	91	86	106	52	3.53386	3.48796	3.62466	3.40321	4.24277	3.20124	5.68073	1.57336	7.07791	2.42811	1.45991	0.923576	0.766407	1.75895	1.61587	1.09949	1.27308	1.12313	1.1517	0.298354	5.70262e-15	-1.80837	down
gene-MGC138914	287	248	814	229	108	228	265	159	103	221	46	1050	178	2709	155	518	249	240	291	1768	2.54061	2.26489	7.08259	1.95495	0.870266	1.85617	2.07513	1.29716	0.846061	1.89004	0.354033	9.13974	1.49073	24.3319	1.11936	4.10865	2.21968	2.06573	2.13327	15.5082	0.0334185	1.59361	up
NewGene_15004	21	22	47	66	57	72	31	24	55	58	30	114	104	72	38	108	78	83	172	145	0.394115	0.217154	0.394829	0.59895	0.727585	0.944841	0.190137	0.17368	0.573026	0.388887	0.239476	1.23835	1.1281	0.651933	0.331813	1.34793	0.923443	0.9213	1.81915	1.60659	0.00103481	1.16352	up
gene-SMIM10	45	21	41	62	22	7	38	51	32	83	115	121	48	28	91	43	99	119	58	87	0.644432	0.316055	0.594171	0.882311	0.288908	0.090695	0.495649	0.702917	0.430796	1.14941	1.51211	1.71593	0.674963	0.415267	1.07578	0.576215	1.485	1.66383	0.713346	1.27937	0.00827487	1.08119	up
gene-PTI	119	45	271	54	62	202	308	73	88	75	299	578	407	189	556	544	238	393	1248	450	3.58391	1.43941	8.3462	1.61363	1.75575	5.82116	8.55307	2.08779	2.4694	2.16954	8.29707	17.2069	12.0637	5.99731	13.7851	15.2953	7.50322	11.5477	32.512	13.9815	1.97774e-08	2.00238	up
gene-KLF15	466	1561	1566	855	2765	1670	2393	1598	1941	1425	496	732	345	481	718	429	338	378	537	234	5.37654	19.3261	18.4385	9.88289	30.3373	18.4448	25.3628	17.6462	20.9716	15.8959	5.24772	8.30868	3.9025	5.83116	6.78965	4.60134	4.07553	4.2439	5.33116	2.76575	1.46033e-13	-1.69463	down
gene-DNAJB9	9230	4739	4789	3701	5831	3593	5698	3979	6397	5034	2658	1617	1505	1510	1955	1431	1374	2124	1767	1529	102.108	56.1662	53.9622	40.9188	61.2245	37.9869	57.7898	42.0818	66.1439	53.7502	27.0758	17.6025	16.3432	17.5595	17.715	14.7196	15.8919	22.8434	16.8237	17.3934	1.24802e-17	-1.51685	down
gene-SLC16A3	1042	2257	1551	1873	1894	2208	2548	2978	1690	1324	3902	3282	4143	3127	3462	3945	3873	3322	3866	3791	12.0679	27.1229	17.7497	21.2406	20.464	24.0925	26.2013	31.9721	17.7524	14.3567	40.8804	36.7064	46.4523	36.8167	32.4672	42.1608	45.9423	36.594	38.5091	44.5059	7.53578e-09	1.0287	up
gene-RHOBTB1	1946	1032	961	1645	1154	1654	1366	1591	1489	1405	2507	3914	3406	2414	3100	3227	2651	2381	3619	3319	13.3814	7.67516	6.69093	11.4569	7.4745	10.6353	8.86621	10.8029	9.7744	9.35917	15.5365	26.262	22.8312	17.4801	17.757	20.609	19.0189	15.7283	21.416	23.3581	5.58098e-15	1.17825	up
gene-C3H1orf226	239	443	182	114	320	134	413	192	348	188	207	114	78	76	60	91	79	115	128	111	1.37102	2.7256	0.789491	0.475913	2.0479	0.531103	2.41667	0.844531	1.95859	0.763716	1.20336	0.513078	0.311972	0.346098	0.217144	0.5602	0.375161	0.514958	0.478996	0.471891	6.4401e-05	-1.18751	down
gene-PTPRF	319	167	315	95	310	242	311	157	215	131	87	96	47	82	67	107	86	91	170	95	1.11604	0.624706	1.12186	0.332614	1.03023	0.806937	0.997036	0.523825	0.702961	0.440295	0.27713	0.328977	0.160893	0.300424	0.191363	0.345498	0.313235	0.308225	0.51033	0.341191	1.93037e-06	-1.19045	down
gene-ELOVL7	305	101	331	209	392	118	231	207	510	101	84	99	85	41	122	52	46	68	109	71	2.28559	0.810375	2.52522	1.56242	2.7882	0.843046	1.58811	1.47672	3.57268	0.728923	0.57526	0.729095	0.620063	0.317712	0.744441	0.355214	0.353981	0.489862	0.700463	0.541552	4.95603e-08	-1.60664	down
gene-SLC38A3	24	29	68	33	73	44	67	35	52	48	60	128	67	29	95	102	78	78	92	153	0.213592	0.283908	0.823268	0.37626	0.881162	0.44851	0.551586	0.299186	0.559507	0.415716	0.665431	1.23469	0.595701	0.27226	0.87068	1.26418	0.905739	0.683793	0.938834	1.87661	0.000338282	1.01041	up
gene-EFS	21	19	61	70	51	65	65	16	54	22	95	141	84	94	69	73	43	64	170	79	0.23918	0.200994	0.647977	0.682637	0.494206	0.614044	0.615614	0.150687	0.513539	0.242256	0.945125	1.48925	0.868438	0.969075	0.554751	0.710749	0.469379	0.710046	1.59138	0.793791	0.000522588	1.13455	up
gene-HYOU1	2900	1506	1296	1424	1768	1434	1824	1078	2406	1175	758	832	525	864	1023	651	625	679	1212	631	17.1133	9.54924	7.80195	8.41884	9.9239	8.07726	9.83453	6.09219	13.242	6.70499	4.12883	4.79186	3.04228	5.34706	4.92906	3.5898	3.86336	3.899	6.1466	3.81758	7.36416e-08	-1.04121	down
gene-FGG	43	51	69	43	67	62	73	42	26	57	521	66	61	191	264	75	41	48	72	65	0.661063	0.864665	1.11651	0.670666	0.998429	0.918791	1.05222	0.627943	0.379529	0.87758	7.6684	1.04549	0.932896	3.20534	3.44481	1.09679	0.689596	0.735902	0.978677	1.05087	0.00137922	1.50762	up
gene-ISYNA1	146	229	453	324	238	329	512	181	213	513	782	898	715	343	1266	919	612	717	862	840	2.13042	3.57189	6.73017	4.72244	3.28529	4.58641	6.85152	2.51842	2.90073	7.21931	10.4613	12.8775	10.217	5.26011	15.1202	12.4513	9.3091	10.1615	10.8219	12.5699	1.02788e-10	1.4411	up
gene-ASB5	83727	71142	93508	65424	79468	55540	95349	68955	115249	84919	88638	23657	15577	54862	22450	21815	16968	52548	24404	19127	774.115	704.352	880.429	604.401	697.138	490.338	808.148	608.853	995.495	757.601	750.734	214.862	141.054	532.823	169.831	187.14	163.614	471.955	194.023	181.368	0.00622979	-1.13786	down
gene-TM4SF18	257	73	88	85	151	34	128	160	306	95	129	70	42	41	100	19	88	48	49	43	5.89756	1.76301	2.06284	1.97187	3.35158	0.747491	2.6855	3.48531	6.49548	2.10996	2.68073	1.69588	0.980426	0.970303	1.84061	0.379832	2.12193	1.04388	1.03261	0.979618	0.0153996	-1.04087	down
gene-CXXC5	948	647	740	666	788	1050	697	550	953	1198	937	1966	1916	1778	1948	1579	1312	1196	2744	1907	9.10322	6.69049	7.98639	6.37439	5.58028	10.4903	6.42947	5.24345	9.79938	11.7812	9.13523	19.1482	20.4196	19.0447	16.3917	13.9495	14.0213	12.0821	25.6674	21.2799	9.09393e-11	1.15217	up
NewGene_9657	39	15	78	31	27	61	97	25	66	22	72	118	93	23	127	76	39	67	221	63	1.18399	0.490237	2.47259	0.949733	0.786177	1.78791	2.75264	0.735951	1.90409	0.642182	2.04	3.59691	2.81286	0.727456	3.23127	2.18363	1.24604	2.02787	5.91126	2.01146	0.0102653	1.03631	up
gene-NRIP2	18	17	112	215	25	45	87	83	42	216	372	492	326	185	365	358	292	383	260	424	0.182223	0.185025	1.15773	2.17952	0.237507	0.432418	0.811571	0.806572	0.391982	2.11941	3.46497	4.92072	3.2468	1.97182	3.04031	3.37356	3.09898	3.7886	2.27032	4.42177	3.94181e-07	2.10314	up
gene-LONRF3	5415	2787	2892	1322	3530	2709	4407	2320	4209	3100	2021	566	555	1864	833	694	464	1210	1095	593	19.9308	11.7512	11.4317	7.41702	12.6196	10.7174	14.9966	9.4091	14.8547	13.051	11.17	2.91222	3.1339	7.75589	4.00724	3.57062	2.68015	6.49673	5.28529	3.48783	9.18245e-08	-1.61159	down
gene-LOC783396	88	72	70	69	68	56	96	58	111	54	32	25	43	23	67	38	22	7	53	36	0.526098	0.457111	0.423006	0.407101	0.385258	0.319427	0.525303	0.326893	0.616976	0.309262	0.173857	0.144834	0.250234	0.143053	0.325209	0.208313	0.135657	0.038578	0.270726	0.217077	0.000996381	-1.02208	down
gene-LYPD6	101	65	73	161	134	95	91	92	113	103	115	229	195	113	221	277	168	150	319	199	0.721388	0.498521	0.531418	1.15138	0.907325	0.64991	0.597852	0.617182	0.747784	0.711743	0.751027	1.60726	1.36563	0.838514	1.29276	1.83876	1.25732	1.03014	1.96908	1.46438	2.13767e-06	1.02579	up
gene-FAM212B	52	73	120	72	92	102	95	62	47	110	159	276	115	143	241	198	185	162	163	187	0.940405	1.41705	2.23263	1.30159	1.59095	1.77078	1.58661	1.07334	0.793868	1.93556	2.66296	4.96228	2.05061	2.74968	3.60199	3.35383	3.52862	2.86897	2.56148	3.49726	3.68453e-11	1.24221	up
NewGene_12240	181	101	75	113	268	107	210	80	159	133	19	15	58	70	32	64	40	41	68	41	1.41027	0.649298	0.519004	0.831331	1.11361	0.656258	1.18204	0.500331	0.765161	0.944027	0.086387	0.174637	0.482137	0.595072	0.214246	0.475188	0.393804	0.359504	0.360109	0.323	3.46457e-06	-1.53171	down
gene-FADS2	227	144	234	280	184	186	440	240	239	267	707	440	492	587	1071	841	470	544	672	448	2.02542	1.38587	2.15105	2.52146	1.56794	1.59563	3.57291	2.06636	2.01135	2.32575	5.83812	3.862	4.3456	5.56718	7.89298	7.04293	4.34921	4.76517	5.21579	4.14263	6.12942e-15	1.46496	up
gene-FADS1	41	78	105	70	50	62	107	57	67	54	134	198	250	316	322	283	156	255	182	118	0.331329	0.755576	0.971158	0.575009	0.388382	0.479117	0.806061	0.448931	0.51692	0.424025	1.0991	1.60958	2.20873	3.00286	2.37498	2.36097	1.46833	2.23423	1.40934	1.09139	1.33834e-14	1.7914	up
gene-NFKBIA	2826	4137	3939	1983	6098	2899	4253	3850	3184	3104	1826	2572	1149	732	1257	1741	959	1202	1353	976	47.8793	75.0546	67.9609	33.5575	98.0188	46.8881	66.0497	62.2873	50.3935	50.7415	28.3306	42.8042	19.0605	13.0185	17.4184	27.3655	16.9342	19.771	19.7049	16.9559	6.52754e-11	-1.31754	down
gene-BMPER	54	39	51	45	45	83	98	32	57	30	174	241	97	68	180	104	130	165	424	91	0.429349	0.329149	0.411351	0.355682	0.338714	0.628456	0.709672	0.242665	0.418201	0.230309	1.27013	1.88483	0.753089	0.567118	1.17307	0.763883	1.07946	1.27165	2.90205	0.742492	4.49285e-09	1.69942	up
gene-IYD	54	41	137	69	152	474	54	101	169	51	114	94	710	199	665	421	424	160	175	396	1.10796	0.916243	2.70562	1.45348	2.7856	9.52971	1.07345	1.81958	3.36344	0.878276	2.07448	1.68245	14.0911	3.87985	11.6579	8.56813	9.50672	3.32072	2.96138	8.51062	0.00891059	1.52305	up
gene-ACKR1	311	105	550	49	679	326	228	218	477	46	169	166	24	151	48	69	75	68	289	83	8.16686	2.94751	14.7418	1.26314	16.9514	8.19179	5.48313	5.46389	11.7323	1.15563	4.07467	4.29114	0.604691	4.15475	1.02935	1.66635	2.05769	1.73094	6.5296	2.23782	0.0254379	-1.29261	down
gene-PDGFD	31	12	65	16	17	50	46	22	40	29	43	66	74	92	47	56	62	114	200	39	0.39694	0.234944	0.972926	0.202482	0.241777	0.751768	0.571255	0.408155	0.51746	0.355803	0.616497	1.24841	0.959242	1.33159	0.570826	0.672403	0.880816	1.51839	2.56621	0.532686	0.00020874	1.37125	up
gene-PDGFC	411	461	852	365	784	735	659	549	946	535	356	357	185	259	257	273	206	301	451	216	3.58516	4.30241	7.63336	3.1831	6.75053	6.15471	5.32109	4.6202	7.71775	4.50741	2.86901	3.05617	1.56931	2.37363	1.84256	2.20712	1.86896	2.54936	3.39	1.92707	1.3703e-09	-1.04213	down
gene-TMEM132E	35	40	65	41	11	53	51	8	19	70	52	129	70	108	115	71	73	72	138	73	0.142073	0.170854	0.268619	0.164271	0.042381	0.203914	0.190158	0.030495	0.072122	0.273416	0.193721	0.515145	0.278064	0.462065	0.384598	0.268096	0.310156	0.283756	0.48452	0.30582	0.000370944	1.27288	up
gene-DBX1	111	23	25	28	18	18	33	27	77	133	81	82	92	208	94	74	157	107	188	109	1.56622	0.338056	0.358247	0.390574	0.228005	0.233695	0.418805	0.359444	1.01017	1.80681	1.04187	1.13298	1.26986	3.08313	1.0842	0.9605	2.30072	1.45873	2.28455	1.57387	0.00224829	1.37427	up
gene-HIST1H2AK	979	1294	591	990	1382	1332	1413	1278	1073	1040	519	310	376	680	951	611	306	497	612	396	47.3165	66.993	29.1081	47.8438	63.393	61.5234	62.6417	59.0105	48.4825	48.5169	22.9669	14.7252	17.8072	34.5029	37.6086	27.3985	15.4126	23.3212	25.4225	19.6311	1.29069e-06	-1.03164	down
gene-SLC3A2	3922	9919	11356	8721	9658	19232	9580	12781	9775	8918	3036	5264	5006	5041	5607	4536	4763	2857	7296	4782	51.4184	138.949	151.953	114.392	119.882	240.937	114.886	159.689	119.473	112.884	36.3768	67.6464	64.1446	69.2674	60.0206	55.0585	64.976	36.3	82.0671	64.1627	3.21666e-06	-1.01297	down
gene-ELL2	2599	2100	1478	792	1411	877	778	836	1576	660	445	647	521	723	565	669	471	771	990	536	11.9515	10.3105	6.89087	3.63427	6.15068	3.82855	3.25386	3.64015	6.74343	2.92513	1.86294	2.8952	2.32858	3.47165	2.11299	2.84211	2.23738	3.41484	3.89971	2.50563	0.000380034	-1.00149	down
gene-RFLNB	1066	764	1595	946	972	1103	1035	1171	1181	1009	4346	1896	2388	2052	3543	1998	2191	3298	2622	1938	7.24919	5.56488	11.0445	6.42552	6.26853	7.16465	6.45017	7.60248	7.50441	6.62138	27.0799	12.667	15.91	14.6631	19.7166	12.6068	15.5389	21.7949	15.3346	13.5212	5.09702e-17	1.37339	up
gene-CYB561D1	116	68	158	133	134	183	203	305	146	143	227	219	231	125	164	344	696	355	819	295	0.784732	0.449525	0.988837	0.860602	0.942842	1.12225	1.4315	2.32495	0.937835	0.932551	1.61229	1.51346	1.57781	0.928505	0.90454	2.17935	5.42985	2.1509	5.10258	1.93099	0.000409124	1.23447	up
gene-GATM	119	67	85	139	38	67	92	33	79	118	168	129	255	124	155	221	198	196	314	297	1.36905	0.824414	0.96103	1.56978	0.41259	0.73758	0.972416	0.340423	0.848956	1.27917	1.77173	1.45428	2.83709	1.50171	1.45743	2.32911	2.34643	2.1813	3.09582	3.48463	1.58097e-06	1.38935	up
NewGene_4309	718	67	51	32	94	18	123	54	46	42	79	4	4	69	8	48	18	11	29	19	2.22834	0.218323	0.158022	0.097573	0.272744	0.052619	0.344207	0.155204	0.130238	0.121415	0.219403	0.01061	0.011998	0.22137	0.018326	0.136053	0.055254	0.032566	0.075	0.058588	0.0174951	-2.03792	down
gene-QPRT	11	33	79	24	32	52	57	35	17	32	56	53	53	39	67	59	57	49	229	61	0.238228	0.760301	1.75478	0.512719	0.651741	1.07412	1.13397	0.713229	0.347907	0.665502	1.12027	1.13505	1.1216	0.881224	1.19896	1.19115	1.29139	1.04091	4.30068	1.3543	0.00889167	1.02883	up
gene-PLAUR	235	72	160	47	224	107	244	88	357	98	90	32	51	90	155	100	37	65	87	35	4.79167	1.56535	3.32116	0.946314	4.3342	2.07802	4.56102	1.70835	6.80377	1.92444	1.67334	0.638638	1.00267	1.91066	2.57807	1.87646	0.780921	1.27644	1.5106	0.720228	0.00997252	-1.02479	down
gene-PAMR1	39	12	21	7	35	17	41	38	5	36	115	71	39	103	35	94	60	52	21	81	0.371114	0.116611	0.199929	0.063133	0.313764	0.14819	0.357341	0.342776	0.036141	0.326929	1.01829	0.669573	0.367275	1.04501	0.273426	0.837033	0.60005	0.485327	0.170204	0.801229	0.000501787	1.56245	up
gene-PDK4	149193	115600	109619	108415	85964	91268	77835	88760	154411	76399	37110	52391	15915	23965	34716	22075	23888	34242	16246	19509	1054.18	874.671	788.779	765.418	576.324	615.8	504.161	598.945	1019.3	520.891	240.204	363.643	110.137	177.868	200.705	144.723	176.028	235.031	98.709	141.37	9.70648e-19	-1.86081	down
gene-ADM	4512	3820	2413	652	2177	1777	1363	1591	2088	1110	788	792	649	576	501	936	516	446	1365	435	76.108	68.4852	40.9455	11.1886	34.7149	28.4639	21.0327	25.5257	32.6959	17.5717	11.8859	12.3361	10.6736	9.91646	6.77038	14.5162	9.20402	7.10526	19.8978	7.22665	1.34694e-05	-1.58379	down
gene-KCP	43	0	202	71	55	38	69	21	61	34	96	219	79	71	133	76	120	161	89	86	0.147085	0	0.717342	0.243657	0.178225	0.125044	0.221212	0.066425	0.194532	0.112929	0.30236	0.859783	0.270914	0.25343	0.396621	0.246	0.457492	0.576879	0.265587	0.316796	0.0472582	1.04344	up
gene-TMEM233	1452	1579	3665	1663	1377	2433	1224	2008	1477	1375	3192	3522	3148	2687	2545	4966	4652	4825	6396	4048	15.8908	18.5028	40.8539	18.1853	14.2986	25.4346	12.2832	20.9858	15.1056	14.523	32.012	37.8715	33.7538	30.8895	22.7954	50.4415	53.1048	51.3082	60.2054	45.4451	3.40303e-08	1.22405	up
gene-CEBPD	6414	6630	5142	2969	7797	5117	5722	4467	6883	2941	1840	2462	610	934	1607	1329	629	635	1445	639	107.363	118.846	87.6518	49.6606	123.838	81.7975	87.8048	71.4138	107.643	47.502	28.2028	40.4763	9.98795	16.4215	22.0072	20.6312	10.9715	10.316	20.7904	10.9662	1.23919e-17	-2.10814	down
gene-ARRDC2	6073	8997	4710	3414	4580	5012	5055	5244	6634	3760	1577	1436	1098	729	2091	1975	1327	713	970	683	67.1719	106.532	53.0397	37.6924	48.026	52.8972	51.2376	55.3547	68.527	40.1035	15.9556	15.5844	11.8795	8.44746	18.9152	20.2579	15.2994	7.63671	9.19903	7.72931	1.23919e-17	-2.01895	down
gene-METRN	201	91	121	187	246	310	138	200	265	270	84	35	89	77	209	40	31	53	71	120	5.38022	2.60716	3.29163	4.97868	6.23475	7.90344	3.38262	5.0965	6.623	6.97046	2.03871	0.91485	2.32974	2.15894	4.57023	0.970141	0.860283	1.35304	1.61241	3.29531	0.00027019	-1.24392	down
gene-DNAJA4	44614	8777	6106	5137	8219	7693	8956	8017	9265	9570	8982	3381	3564	5196	5674	1980	1840	5611	4497	3700	376.649	78.6941	51.945	43.023	65.9464	61.3306	68.4372	64.1201	72.6074	77.333	68.5444	27.8321	29.0458	45.8	38.9766	15.3074	15.9963	45.8847	32.416	31.6628	0.00467624	-1.35787	down
gene-DNAJA1	14189	6443	3240	5441	4366	4132	6175	3284	7009	5043	3482	2149	2409	3923	3855	1637	2249	2904	3986	1719	261.458	127.138	60.799	100.176	76.3286	72.6931	104.312	57.779	120.665	89.6574	58.7793	38.8891	43.4693	75.9193	58.1154	27.9811	43.2157	51.9785	63.1483	32.4845	0.000481084	-1.01115	down
gene-KLHL30	10717	10570	11007	10057	10406	11035	20426	12263	15468	15939	7708	3158	3007	15822	4754	5977	2699	2997	7789	1913	45.2049	47.7448	47.2826	42.3886	41.6456	44.4472	78.9855	49.4013	60.9548	64.8761	29.7834	13.0841	12.4224	70.1073	16.4055	23.3937	11.8696	12.2794	28.2506	8.2725	0.0170024	-1.05798	down
gene-SETBP1	775	297	352	265	369	277	316	261	303	210	320	1041	800	834	781	807	562	753	885	624	2.09085	0.856711	0.967323	0.714025	0.945712	0.711928	0.781405	0.672907	0.762734	0.545374	0.788941	2.76095	2.11439	2.36662	1.72419	2.02214	1.57983	1.97428	2.05738	1.72848	2.32039e-06	1.17552	up
gene-CPED1	982	314	1031	810	405	566	518	530	672	974	880	1893	1186	1151	1446	955	1488	2059	1032	1518	5.1737	1.54806	4.83469	3.72862	1.85352	2.48522	2.18157	2.37828	2.8874	4.33923	3.91088	8.57477	5.43929	5.5605	5.51754	4.16289	7.16486	9.21239	4.08041	7.17481	4.7429e-06	1.0878	up
gene-ARHGAP22	134	79	75	92	45	100	147	52	44	128	252	339	117	189	189	175	244	151	566	195	1.1749	0.741565	0.66572	0.790418	0.364288	0.823825	1.23198	0.432407	0.349619	1.08058	2.11815	3.07635	1.05156	1.82796	1.35313	1.49185	2.32517	1.34138	4.47511	1.84582	4.65958e-07	1.48527	up
gene-ULBP27	98	298	166	84	167	159	176	195	110	71	37	50	83	26	69	41	53	53	82	34	2.16665	7.06288	3.74922	1.85363	3.51005	3.36331	3.56899	4.12797	2.26567	1.51751	0.743373	1.08801	1.79576	0.583513	1.25242	0.837104	1.22601	1.13299	1.56311	0.764424	1.24655e-06	-1.4657	down
gene-SNED1	532	1105	1209	377	852	807	1039	602	1258	625	231	219	108	279	159	172	166	225	192	149	2.35452	5.28453	5.45745	1.6552	3.56641	3.4133	4.26824	2.48479	5.29829	2.6453	0.906779	0.938762	0.452848	1.26481	0.561577	0.683833	0.751027	0.945505	0.708753	0.656158	2.22169e-21	-2.03238	down
gene-PDE3A	161	197	150	170	143	187	217	132	101	204	278	284	205	340	404	369	271	317	384	360	0.545896	0.715522	0.519286	0.575436	0.458874	0.605045	0.676223	0.427723	0.320373	0.669187	0.864525	0.947416	0.680389	1.21115	1.12147	1.16378	0.960613	1.04697	1.12081	1.25397	2.70768e-10	1.03594	up
gene-CRISPLD1	17	46	77	69	23	20	52	22	17	29	96	56	38	58	55	72	55	85	71	127	0.148386	0.451451	0.713785	0.627857	0.200383	0.170803	0.433833	0.190873	0.14	0.249976	0.801109	0.498503	0.33402	0.555316	0.406712	0.605526	0.517687	0.749733	0.557548	1.19552	0.00583895	1.04131	up
gene-ZFAND2A	8771	177	139	69	201	88	181	45	126	100	141	67	51	69	85	52	57	35	118	29	124.35	3.63637	2.11653	1.05966	2.75756	1.11234	2.45542	0.591051	1.80859	1.58847	2.40455	0.859249	0.680451	1.02333	1.08827	0.637248	0.877545	0.437315	1.43435	0.362021	8.95282e-05	-3.88073	down
gene-FNIP2	11258	10115	8886	2490	7635	4339	9928	6642	13057	5158	5464	1020	897	9768	1513	639	1097	1532	1033	733	42.0192	39.6876	33.0983	9.499	26.4801	15.2581	34.0145	23.1912	44.4901	18.7504	18.4811	3.87997	3.39727	37.3712	4.65304	2.27696	4.23014	5.59253	3.44252	2.91225	0.0174163	-1.58067	down
gene-SLC6A17	58	220	153	192	108	100	271	122	133	148	24	172	25	124	45	39	17	16	51	51	0.243657	1.09047	0.679456	0.815885	0.433321	0.403521	1.08773	0.495115	0.527899	0.711669	0.093283	0.716739	0.102493	0.551546	0.156579	0.152756	0.075421	0.064926	0.183751	0.219713	0.00220486	-1.34697	down
gene-HVCN1	21	42	97	49	32	47	102	19	22	40	78	187	96	55	73	133	103	120	116	44	0.178148	0.390419	0.871104	0.427261	0.262206	0.398986	0.856387	0.15972	0.176166	0.337876	0.632148	1.63596	0.860552	0.503979	0.598277	1.15291	0.952114	1.03489	0.928559	0.443208	0.000653614	1.2035	up
NewGene_8461	13	14	17	29	66	39	12	58	24	64	59	11	85	79	87	149	34	43	81	70	0.165677	0.234222	0.22041	0.509144	1.05735	0.58557	0.145689	1.04053	0.296245	1.11597	0.987681	0.188128	1.13739	1.12915	1.44755	2.11239	0.712771	0.585833	0.991439	1.12878	0.0159488	1.17847	up
gene-OR51E1	92	57	133	16	13	61	50	219	24	37	61	170	32	126	206	177	91	156	185	292	0.858789	0.57286	1.27119	0.141943	0.110415	0.544329	0.425607	1.9556	0.208281	0.329595	0.521702	1.55879	0.29335	1.23894	1.57767	1.53526	0.886032	1.4156	1.49281	2.80742	0.0350779	1.12712	up
gene-TMEM119	10	3	12	9	6	7	17	6	9	0	77	98	46	138	67	44	38	40	172	37	0.096442	0.025325	0.170487	0.084901	0.054151	0.070049	0.161108	0.06086	0.088049	0	0.758366	1.34267	0.558964	1.99042	0.711189	0.649368	0.416641	0.474698	1.9344	0.41701	5.10265e-16	3.34865	up
gene-CPA5	22	9	40	40	7	21	43	40	31	82	75	36	72	24	124	43	120	72	133	32	0.236839	0.088043	0.67763	0.627541	0.074987	0.286721	0.652233	0.634273	0.293037	1.27464	1.10199	0.545371	1.12357	0.331544	1.66011	0.658512	2.00743	1.14731	1.85153	0.361344	0.00799055	1.22054	up
gene-CPA3	43	14	83	4	34	49	68	25	44	21	53	144	78	29	86	93	27	78	223	88	0.694997	0.229263	1.36325	0.062963	0.580595	0.862844	1.02201	0.378947	0.721924	0.328452	0.896901	2.30135	1.32346	0.489646	1.17951	1.39702	0.472764	1.22799	3.13911	1.51126	0.00403782	1.29127	up
gene-PIK3R6	52	67	65	23	29	42	70	33	28	14	83	112	68	59	112	63	117	91	77	70	0.301626	0.420056	0.384783	0.133868	0.160509	0.23179	0.380701	0.188118	0.152755	0.075291	0.450763	0.673615	0.397889	0.369563	0.545626	0.345818	0.723562	0.523152	0.392198	0.42445	0.000370944	1.09484	up
gene-FMOD	750	1080	800	734	526	775	1037	422	1062	777	1353	1321	976	4487	1863	1576	962	1131	2062	643	7.52163	11.6084	8.17347	7.36093	5.00864	7.42883	9.53981	4.04317	9.95847	7.52105	12.4393	13.0258	9.59094	47.3263	15.302	14.6802	10.0717	11.0241	17.7977	6.61864	0.00024695	1.15034	up
NewGene_844	118	165	93	105	141	139	284	115	208	165	55	74	67	63	43	46	38	67	109	77	1.93889	3.00476	1.55611	1.61345	2.19458	2.16084	4.21135	1.75319	3.19702	2.69156	0.776604	1.12083	1.15857	1.07406	0.576499	0.572894	0.655883	1.16972	1.55128	1.23616	3.31628e-07	-1.16337	down
gene-RHPN2	120	192	127	190	181	94	125	100	96	147	44	105	65	33	52	38	12	52	78	121	1.01206	1.73572	1.08925	1.60258	1.45068	0.755602	0.967568	0.803845	0.758881	1.19863	0.34042	0.873558	0.534957	0.292233	0.355958	0.29743	0.104605	0.421941	0.562271	1.04937	0.000500212	-1.14495	down
gene-MSTN	478	26	104	112	107	33	13	98	92	99	28	732	708	172	363	392	387	215	387	716	4.61009	0.264448	1.01801	1.07916	0.971374	0.303737	0.114018	0.900867	0.827209	0.917863	0.2449	6.93327	6.68386	1.73832	2.86195	3.50167	3.88463	2.0103	3.20784	7.07683	0.00654035	1.85118	up
NewGene_1242	29	20	81	24	61	30	23	26	240	108	154	91	199	35	296	361	50	218	370	144	0.400632	0.288651	1.44291	0.356838	0.918682	0.391156	0.287039	0.336744	3.70871	1.63739	2.45352	1.4127	3.41218	0.52893	4.34408	5.8751	0.785088	3.67851	5.47816	2.4634	0.00117189	1.67652	up
gene-P4HA3	670	964	907	303	844	580	910	906	1063	938	295	211	117	304	132	115	189	141	180	179	8.27758	12.6962	11.3282	3.67432	9.67486	6.75175	10.1819	10.4682	12.1207	10.919	3.25157	2.52873	1.35492	3.81497	1.29377	1.26626	2.35199	1.63981	1.81305	2.2308	2.58279e-17	-1.99939	down
gene-ABHD2	2269	1354	1077	1192	2194	2109	3245	1472	1900	1748	755	803	273	649	531	710	542	618	1205	786	10.1913	6.85302	5.24319	6.01252	9.77585	9.04716	13.8256	6.32939	5.98498	7.368	3.53957	3.45537	0.899911	2.57605	2.00756	3.0955	2.9579	2.69688	4.69674	4.02972	1.16548e-10	-1.34204	down
gene-MSS51	2567	2191	1663	1774	3572	2934	2117	1764	1907	2605	3226	6057	6120	4115	7265	6302	3780	5945	7542	5946	19.581	13.8221	15.7315	15.7752	32.6559	26.7465	11.5598	15.4723	10.6184	15.0702	28.3273	57.4576	58.4161	41.2671	58.4394	34.3315	37.4479	55.3009	63.3197	58.9141	4.30606e-17	1.36221	up
gene-IKZF2	259	64	106	67	99	77	115	63	78	161	106	274	204	171	274	202	319	224	214	251	0.732955	0.187381	0.298798	0.183014	0.260089	0.201997	0.296786	0.165243	0.200765	0.43745	0.271471	0.758627	0.564913	0.50783	0.633811	0.529207	0.944103	0.614964	0.509206	0.728274	0.00017987	1.12533	up
gene-EMILIN3	77	89	190	252	59	208	173	77	84	109	344	822	338	330	448	322	278	445	525	259	0.552539	0.684915	1.40034	1.82068	0.404506	1.43465	1.14742	0.525549	0.563922	0.758379	2.27935	5.84302	2.39437	2.50526	2.64935	2.15708	2.09665	3.125	3.26636	1.92202	1.59334e-10	1.70358	up
gene-LNX1	409	336	676	155	782	274	81	463	322	245	62	206	75	28	135	230	201	46	145	234	3.53203	2.99032	5.71723	1.25078	6.20654	2.28033	0.604868	3.67433	2.74876	1.96353	0.512115	1.71807	0.604708	0.230791	0.992469	1.80133	1.76971	0.354074	1.00815	2.11012	0.00187784	-1.36695	down
gene-ZSWIM4	1736	590	631	757	720	673	779	597	632	508	908	184	243	551	294	325	112	498	192	112	10.5377	3.79396	3.85925	4.64091	4.1658	3.92712	4.42008	3.42924	3.54828	3.06322	5.05011	1.08667	1.43053	4.10389	1.87561	1.80923	0.699805	2.9074	0.992491	0.689839	0.0209671	-1.06507	down
gene-RIPOR2	269	102	280	185	161	125	251	185	246	181	246	795	468	238	628	175	490	644	210	613	1.521	0.586203	1.49371	0.979234	0.833214	0.671895	1.33477	1.04635	1.29573	0.959748	1.47367	5.11904	3.1191	1.50256	3.49612	0.909523	2.74732	4.14718	0.998915	3.92241	1.09897e-05	1.27199	up
gene-ZBED5	299	213	465	157	202	251	274	306	187	358	255	817	347	499	655	550	459	532	461	833	3.02566	2.30641	4.80482	1.58207	1.94024	2.42955	2.54014	2.96362	1.74059	3.47463	2.3544	8.17686	3.42745	5.32895	5.44804	5.17796	4.82676	5.2744	4.00917	8.66916	3.06569e-06	1.08118	up
gene-ST3GAL1	469	516	626	289	603	843	799	544	638	689	399	324	96	175	246	254	241	437	331	250	1.97852	2.32376	2.71571	1.20602	2.40119	3.38595	3.09279	2.17636	2.52317	2.78188	1.52719	1.32904	0.405497	1.16845	0.839566	0.987211	1.17692	2.16514	1.18822	1.43223	2.59996e-06	-1.03604	down
gene-SLC5A6	616	3808	2918	869	2094	1855	1749	1901	2272	889	604	329	235	460	425	293	301	252	549	311	5.23622	35.1038	25.4561	7.48202	17.0778	15.1731	13.5526	15.6501	18.2613	7.35841	4.66807	2.75527	1.96111	4.13589	2.95371	2.30013	2.64805	2.10105	4.02407	2.70801	2.08661e-15	-2.25492	down
gene-SLC5A3	4657	749	711	789	545	618	793	287	820	694	249	242	156	512	360	216	162	302	443	200	10.9816	1.89278	1.70509	1.85685	1.21707	1.39179	1.72167	0.64949	1.80302	1.57537	0.534516	0.558272	0.357028	1.266	0.69656	0.470553	0.395736	0.689029	0.895455	0.482258	0.000175528	-1.89016	down
gene-SLC6A6	113	152	157	8	200	93	288	125	131	137	39	75	11	58	21	82	13	81	66	30	0.499339	0.723649	0.711348	0.032778	0.840859	0.390906	1.17091	0.527781	0.541577	0.585252	0.157831	0.325397	0.046179	0.264734	0.073688	0.335123	0.058999	0.34628	0.24983	0.132816	0.00170391	-1.46214	down
gene-ZBTB43	777	1097	1261	740	1404	763	1846	1280	1445	1412	1300	378	322	512	437	434	377	771	477	381	3.99012	5.58918	6.5872	3.64063	7.36759	3.97479	8.85202	6.68964	6.42511	7.79478	5.7222	2.04923	1.57922	2.96468	2.03872	1.93299	2.1849	3.74748	1.9405	2.03493	6.86503e-05	-1.03517	down
gene-MT2A	3694	4913	1321	674	6625	831	1144	1504	5818	639	492	394	303	424	445	418	202	295	234	376	234.835	334.455	85.4903	42.8019	399.598	50.4321	66.6234	91.2891	345.511	39.1533	28.6226	24.6006	18.861	28.2517	23.0986	24.6421	13.3639	18.2171	12.7419	24.4739	2.25222e-09	-2.83672	down
gene-KCNG2	29	132	108	53	64	25	144	14	60	53	241	185	152	188	268	82	81	82	72	265	0.458748	2.27216	1.75817	0.839684	0.970247	0.382286	2.12861	0.207085	0.901675	0.812144	3.54893	2.92001	2.40093	3.17253	3.53207	1.21287	1.36214	1.28037	0.996223	4.37505	0.00148601	1.35645	up
gene-GPD2	932	1016	864	1196	789	603	736	670	673	648	1375	1648	2008	2083	1676	2399	1245	1661	2020	1399	2.86929	3.25443	2.29534	3.67368	2.17529	1.69409	2.05542	1.6664	1.57918	1.84952	3.83452	4.79007	5.59566	6.4287	4.10352	6.52587	3.93338	4.67187	4.4389	4.1081	7.5009e-11	1.18959	up
gene-ARC	1489	307	12	92	199	28	144	113	224	82	28	23	71	60	12	32	13	44	41	30	15.113	3.21524	0.109743	0.875252	1.74262	0.235538	1.25411	0.972892	1.94011	0.788975	0.237455	0.224761	0.64258	0.616	0.08169	0.270684	0.1216	0.389144	0.315823	0.274777	0.000119391	-2.89679	down
gene-ARID5B	5448	6396	13327	3187	6612	6745	3786	3373	5155	3962	661	2303	1335	1204	2539	4343	1308	689	1263	676	20.204	25.4078	50.3379	11.8134	23.2752	23.8874	12.8693	11.9451	17.8665	14.1816	2.13851	8.38761	4.85097	4.68508	7.70584	14.9491	5.05877	2.48148	4.02329	2.57167	1.36164e-05	-1.7381	down
gene-DKK1	301	164	141	152	417	182	199	85	307	209	93	265	15	41	184	40	34	80	56	79	8.40918	4.90714	4.00798	4.23656	11.0617	4.85383	5.10528	2.26546	8.02248	5.62855	2.35956	7.2809	0.393851	1.18643	4.21071	1.02356	0.98118	2.16989	1.32559	2.26547	0.00263355	-1.26293	down
gene-SLC39A14	3209	1763	1174	1141	1730	1153	1819	1412	2470	1379	1012	806	706	845	814	733	592	938	1064	600	18.5581	10.8636	6.93329	6.61703	9.52716	6.39283	9.59107	7.82218	13.4026	7.72825	5.37968	4.59747	4.01078	5.15091	3.86607	3.9498	3.58405	5.28868	5.22923	3.56965	1.23752e-06	-1.01699	down
gene-PDXK	1030	2946	2319	1486	1643	1472	2744	1674	1722	1327	636	639	691	556	1374	822	564	501	1176	522	4.72363	15.9063	10.946	7.20535	7.75973	6.80905	12.3175	7.43664	7.81827	6.21334	3.18756	3.15712	3.35876	3.14807	5.45986	3.77466	2.87406	2.44787	4.64811	2.74829	9.37384e-09	-1.22951	down
gene-BTG1	5725	4682	9718	3609	7504	5752	5429	4118	6250	3737	2219	2967	1698	1678	3077	2589	1437	2284	3903	2312	86.4521	75.7197	149.461	54.4554	107.521	82.9512	75.1504	59.3877	88.1845	54.4492	30.6988	44.0064	25.107	26.6098	38.0179	36.2693	22.63	33.5014	50.6836	35.8069	1.28375e-11	-1.15318	down
NewGene_8436	615	86	412	73	248	282	393	512	716	858	4	96	94	12	173	123	21	45	161	127	3.22441	0.521235	2.04225	0.339868	1.14907	1.34624	1.75034	2.49745	3.53775	4.4782	0.014391	0.583469	0.471651	0.046929	1.06975	0.58388	0.142759	0.240968	0.657002	0.659849	0.000286383	-2.24609	down
gene-TP63	408	205	661	381	190	610	149	547	197	558	186	978	1086	635	1006	1603	1074	500	1335	1461	2.83637	1.6231	5.44411	3.12399	1.24492	4.84233	1.05499	4.32965	1.58513	4.35358	1.37581	7.42292	8.52917	5.56702	6.89843	11.9691	9.12602	4.09387	9.06496	12.4005	0.000786169	1.42427	up
gene-ADRB2	4391	1702	4538	2362	2788	2911	2054	1983	3164	1916	1180	959	683	1146	1664	1189	471	1074	1191	904	57.7474	23.9688	60.7827	31.0307	34.7852	36.5607	24.7638	24.9025	38.878	24.3174	14.2119	12.383	8.79151	15.8314	17.9006	14.5023	6.45375	13.7129	13.4614	12.1827	3.90164e-10	-1.33798	down
gene-AMPD3	3059	2169	1462	1530	1819	1283	1943	1389	1995	2463	1630	1089	397	1329	775	636	698	1220	416	645	18.6675	14.1752	9.08246	9.32653	10.5324	7.47261	10.8666	8.09343	11.3703	14.504	9.10889	6.52467	2.37238	8.51967	3.8676	3.60118	4.44002	7.22935	2.17997	4.03199	0.000325708	-1.02289	down
gene-LOC781977	161	119	240	138	97	79	325	53	51	117	346	406	168	185	615	546	511	416	664	248	2.19973	1.72933	3.35052	2.0007	1.28269	1.06288	4.06728	0.655712	0.619036	1.97504	4.28881	5.56364	2.23386	2.65775	6.85305	6.97824	7.05722	5.44789	7.8377	3.59651	4.13154e-07	1.66287	up
gene-FAM124B	65	5	48	39	6	14	25	27	37	22	140	90	60	56	109	88	157	161	58	131	0.455033	0.037389	0.337982	0.27115	0.039871	0.090137	0.155464	0.180833	0.239855	0.148431	0.899927	0.619915	0.412081	0.411203	0.625743	0.5727	1.15257	1.09829	0.348349	0.946388	2.77756e-06	1.96353	up
gene-ANGPT1	77	33	51	58	49	40	25	38	117	87	95	231	190	120	124	62	115	258	96	159	0.937744	0.427421	0.628441	0.699926	0.562443	0.460233	0.273418	0.432233	1.32529	1.01413	1.05154	2.76175	2.2592	1.53029	1.22921	0.692156	1.45915	3.04846	1.00309	1.98386	1.31445e-05	1.42171	up
NewGene_11525	95	132	76	14	61	40	66	66	80	24	21	0	26	6	47	12	21	6	48	28	1.02486	1.6698	0.973958	0.159184	0.560512	0.370648	0.765426	0.621127	0.728343	0.176257	0.14156	0	0.229193	0.067702	0.494744	0.083992	0.27401	0.066259	0.390063	0.296292	0.00650514	-1.56657	down
gene-EDN1	708	359	343	242	593	259	182	215	414	155	109	73	24	39	36	49	55	304	126	122	9.34448	5.07159	4.61015	3.19202	7.42103	3.26132	2.19348	2.7018	5.09967	1.96354	1.31396	0.936731	0.303525	0.539334	0.382795	0.596635	0.756555	3.89506	1.42868	1.65188	1.19738e-05	-1.84357	down
gene-B3GALT1	13	0	34	38	17	24	11	34	38	29	16	180	98	51	92	77	105	182	72	262	0.057548	0	0.163734	0.177771	0.07708	0.109629	0.04827	0.151806	0.166725	0.133979	0.067829	0.846509	0.457211	0.253856	0.357205	0.339683	0.52892	0.842483	0.294325	1.2988	1.80496e-06	2.35345	up
gene-ISLR	30	126	213	189	46	123	369	79	106	127	174	530	210	346	570	561	173	300	932	210	0.346748	1.57891	2.53651	2.21517	0.505388	1.3598	4.00297	0.893597	1.22617	1.46127	1.84152	6.07953	2.44625	4.24455	5.46898	6.12369	2.08608	3.47881	9.41375	2.52261	4.14332e-05	1.58062	up
gene-BREH1	116	110	204	137	177	219	258	264	275	337	495	872	270	217	488	187	378	668	330	307	1.657	1.69246	2.97728	1.95277	2.38733	2.98695	3.38332	3.51371	3.53076	4.58892	6.60705	12.5718	3.78713	3.22304	5.61638	2.38896	4.68426	9.26736	3.97415	4.39429	6.06428e-05	1.08567	up
NewGene_11093	839	56	120	265	92	103	104	51	155	135	87	10	17	21	45	15	49	53	53	24	4.82329	0.321098	0.890333	1.42437	0.465257	0.608537	0.658254	0.257933	1.06111	0.699262	0.646983	0.049962	0.087054	0.117176	0.197249	0.073482	0.274566	0.725701	0.241098	0.123272	1.36985e-05	-2.33154	down
NewGene_7944	57	35	63	39	20	24	29	40	49	35	15	109	65	27	202	54	99	70	147	161	0.696596	0.418477	0.774563	0.417003	0.171329	0.287192	0.23596	0.355509	0.557411	0.305649	0.124645	1.22689	0.680503	0.252541	1.90934	0.601244	1.26772	0.868833	1.41709	1.90559	0.00139817	1.31463	up
gene-HSPA6	271141	4430	90	3359	1035	68	1371	92	5787	297	5386	60	125	1006	3360	18	101	834	436	41	2868.46	50.1813	0.967463	35.5029	10.3814	0.68297	13.2922	0.923901	57.1898	3.02462	52.1873	0.616884	1.29046	11.1685	29.0836	0.175967	1.10441	8.56837	3.95722	0.439136	0.00121513	-4.7554	down
gene-PRKG2	37	46	48	54	36	36	53	23	29	28	104	95	65	54	94	81	54	144	76	69	0.205284	0.276282	0.276437	0.306045	0.19219	0.191215	0.272138	0.120232	0.151799	0.152619	0.539902	0.526154	0.360061	0.317527	0.435958	0.422201	0.319436	0.794125	0.369916	0.40107	4.73263e-07	1.17796	up
gene-PDPN	269	185	191	83	260	92	149	72	173	86	92	37	51	105	34	34	38	100	122	56	14.2178	10.4655	10.2793	4.34822	13.0201	4.61489	7.19414	3.64055	8.54022	4.37621	4.42377	1.90064	2.59629	5.78969	1.47331	1.66414	2.06941	5.10503	5.55497	3.00515	0.00199334	-1.13305	down
gene-OSGIN1	378	309	127	302	273	171	335	192	337	131	78	144	51	110	124	53	40	86	96	60	4.90864	4.33316	1.69337	3.86755	3.41388	2.02823	4.0866	2.35826	4.20578	1.56694	0.890701	1.84778	0.610119	1.55556	1.27766	0.598844	0.513576	1.06495	1.04211	0.779975	7.97797e-09	-1.55496	down
gene-CREM	3579	6673	7676	6448	6596	5150	5814	4207	7898	6219	1516	2366	1281	3110	2835	2544	3120	2381	3660	1870	64.8795	124.271	141.681	116.462	111.213	83.0595	92.9492	70.6384	126.564	107.886	23.612	40.5499	20.7375	59.1291	40.8944	41.7472	56.3108	38.8449	53.3354	33.0996	2.2057e-10	-1.18891	down
				MLC1
				SLCO4A1
				SLC25A25
				WBP1L
				CXCL14
				DBP
				RBM15
				FOSL2
				PCMTD2
				NECTIN1
				TMEM204
				PTPN1
				CRHR1
				GADL1
				CA4
				MXRA8
				TACC1
				CARNS1
				SORBS1
				RFTN1
				EGFR
				CYGB
				CACNA1A
				SLC8A3
				MYADML2
				SPTB
				IRS1
				LHX6
				SLC16A3
				SCN4A
				EZR
				MLST8
				CASZ1
				IL6R
				SLC43A2
				CIITA
				PKMYT1
				DTX1
				FZD8
				FADS2
				MMP17
				SIGLEC10
				MAMSTR
				SMTNL2
				GPRC5C
				RHBDF2
				SPON2
				VASN
				IP6K3
				AQP1
				CA3
				ATP2A1
				PEG3
				MAP1B
				DOK4
				PLEKHH3
				RGS6
				ANO1
				CD248
				TNFAIP2
				CACNA1H
				MYH3
				CAV3
				ZBTB16
				LZTS1
				RBM20
				NREP
				MBP
				DISP1
				CACNG1
				RGMA
				GPX3
				SHISA2
				TRIM63
				SSC5D
				MASP1
				DNMT3A
				TMEM131L
				CD93
				TCF15
				CRTC1
				LRRC14B
				DDR1
				PTP4A3
				PRKAG3
				TMEM119
				MYOZ1
				FGFR4
				SNED1
				PTDSS2
				ATP1B3
				COL27A1
				MYO18B
				FAM222A
				FOXO1
				ADA
				SMYD1
				IRF2BPL
				FBXO15
				ANKRD23
				UBE2QL1
				ACKR3
				CACNA2D3
				ADGRF5

## Sheet: Table S8
Table S8. Statistics of DEGs in L_ST vs. T_ST comparison
#ID	T_10ST Count	T_1ST Count	T_2ST Count	T_3ST Count	T_4ST Count	T_5ST Count	T_6ST Count	T_7ST Count	T_8ST Count	T_9ST Count	L_10ST Count	L_1ST Count	L_2ST Count	L_3ST Count	L_4ST Count	L_5ST Count	L_6ST Count	L_7ST Count	L_8ST Count	L_9ST Count	T_10ST FPKM	T_1ST FPKM	T_2ST FPKM	T_3ST FPKM	T_4ST FPKM	T_5ST FPKM	T_6ST FPKM	T_7ST FPKM	T_8ST FPKM	T_9ST FPKM	L_10ST FPKM	L_1ST FPKM	L_2ST FPKM	L_3ST FPKM	L_4ST FPKM	L_5ST FPKM	L_6ST FPKM	L_7ST FPKM	L_8ST FPKM	L_9ST FPKM	FDR	log2FC	regulated
NewGene_11114	1367	420	208	539	159	149	167	130	292	180	139	18	30	144	75	234	43	58	121	21	12.5322	4.15068	2.0524	4.86798	1.61258	1.51883	1.71363	1.25737	2.92602	1.79854	1.12576	0.163228	0.290726	1.47342	0.664286	2.04902	0.382346	0.54234	1.10446	0.181356	0.00104773	-1.94652	down
gene-GLUL	15757	34576	48680	20607	27987	21537	19050	18625	21172	17913	8737	11165	9109	8573	13099	9471	11060	10893	14616	9316	142.718	338.908	480.011	185.316	282.824	217.938	193.418	197.513	211.356	177.974	77.5986	112.458	88.0329	87.7864	126.418	90.4356	108.029	112.349	134.001	86.4882	1.36e-08	-1.14355	down
NewGene_14752	30	38	5	13	0	7	24	8	32	35	147	62	152	28	56	121	90	106	76	73	0.522759	0.714476	0.092772	0.218471	0	0.130596	0.463514	0.158468	0.612958	0.656026	2.50221	1.18491	2.82295	0.543995	1.03761	2.21936	1.66512	2.07693	1.32022	1.29688	3.39e-06	2.27116	up
gene-THSD7A	51	33	42	35	49	28	32	41	39	26	79	78	98	79	68	76	53	57	95	76	0.125213	0.096663	0.106697	0.079654	0.127956	0.073557	0.083543	0.112236	0.100111	0.066183	0.18063	0.202108	0.244264	0.206469	0.174839	0.185213	0.131919	0.154455	0.223411	0.181178	1.25e-08	1.07531	up
gene-TACC1	8752	7656	8032	5829	7185	5337	3106	5763	7624	3435	3170	3700	3250	2278	2472	2763	2395	2825	2351	2641	30.568	29.2055	29.6904	19.7755	27.5486	20.2288	12.1638	23.2108	28.8126	12.9974	10.705	14.362	12.3023	8.76287	8.88401	10.0165	9.03685	10.6472	8.04053	9.38513	6.67e-12	-1.1057	down
gene-ANO1	210	215	99	226	132	84	134	121	173	176	354	522	376	232	207	348	216	416	156	311	1.01422	1.12255	0.511297	1.07476	0.711428	0.45279	0.725467	0.679057	0.916038	0.925477	1.66161	2.77941	1.96299	1.26601	1.08651	1.76486	1.11672	2.25822	0.7507	1.52958	7.28e-06	1.04982	up
gene-LIN7A	95	58	56	99	111	82	58	51	44	43	38	37	24	52	4	31	16	42	20	33	0.528516	0.330133	0.259882	0.535226	0.608832	0.513826	0.320755	0.344725	0.206295	0.2017	0.215834	0.265401	0.188983	0.297397	0.018254	0.138034	0.069508	0.313741	0.090362	0.182987	0.000665474	-1.16441	down
gene-PPARGC1A	20436	6194	3943	5269	2286	6767	6256	5001	19275	4328	14006	589	920	2592	915	1667	1141	853	919	828	82.2166	26.2597	17.2037	20.7285	10.1297	29.8258	28.6227	23.5176	85.1895	18.8792	54.64	2.50467	3.78506	11.3714	3.77777	6.78395	4.92417	3.60785	3.6417	3.27332	0.0144676	-1.69207	down
gene-NOTCH3	491	877	848	984	1370	885	967	933	581	728	1926	3167	2915	1327	1576	1438	1669	1165	1630	2287	1.49748	2.88857	2.79607	2.95994	4.65622	3.00839	3.31695	3.30368	1.93894	2.42411	5.70735	10.6345	9.41614	4.53295	5.09435	4.58539	5.44872	3.99276	4.98571	7.08167	2.84e-09	1.19316	up
gene-GREM1	166	135	112	130	107	213	92	230	223	100	143	515	463	327	227	121	316	441	272	245	0.868376	0.786015	0.650555	0.669305	0.623091	1.24052	0.538014	1.39439	1.27553	0.568674	0.727073	3.09777	2.68696	1.99759	1.31192	0.660788	1.83545	2.59355	1.42478	1.29864	0.00026151	1.07901	up
gene-SLC43A2	5602	6193	16366	10575	5412	20130	13340	11906	13014	12245	6480	6165	4966	2163	2821	5901	4850	1820	4968	3894	20.556	30.1261	58.5763	35.5106	23.5929	73.0563	49.2007	52.2135	49.3544	43.5494	23.7908	22.4039	17.8194	9.30273	11.3435	22.4932	18.0228	7.51959	17.28	13.4495	1.94e-06	-1.36592	down
NewGene_1950	31	27	55	14	11	30	17	16	55	48	153	21	80	285	85	100	181	186	124	211	0.352744	0.307528	0.745859	0.137172	0.136905	0.462062	0.25639	0.260913	0.813866	0.700681	2.00212	0.298202	1.07358	4.3062	1.1836	1.36213	2.63178	2.77042	1.63672	2.72887	4.01e-08	2.27739	up
gene-EFCC1	10	16	41	32	32	39	6	20	12	20	47	164	72	73	150	25	46	103	31	78	0.082677	0.141452	0.365051	0.258028	0.289103	0.357438	0.05075	0.185821	0.104074	0.172717	0.376341	1.49209	0.622405	0.669508	1.30971	0.21203	0.399055	0.956004	0.252058	0.651594	1.47e-05	1.86041	up
gene-CDKN1C	325	558	759	1235	442	721	610	354	241	581	1432	1103	1203	2019	1134	1433	1758	3255	976	1565	6.74657	12.4973	17.0363	25.2778	10.2212	16.6682	14.2354	8.52986	5.46723	13.1582	28.8771	25.1988	26.4292	46.9477	24.9372	31.1095	39.044	75.9157	20.3181	32.9714	5.07e-08	1.5081	up
NewGene_873	123	11	84	143	27	98	34	83	57	39	0	0	16	49	14	42	5	43	12	10	0.989328	0.084415	0.796234	1.24199	0.244586	1.48666	0.418582	0.951615	0.68061	0.426747	0	0	0.120498	0.437528	0.114282	0.393775	0.046296	0.415752	0.117717	0.073877	0.00939889	-1.80567	down
NewGene_6228	388	373	208	373	357	244	199	195	272	178	118	189	150	175	52	128	80	216	143	62	2.56163	2.65413	1.48183	2.42212	2.6175	1.79194	1.46848	1.48791	1.96249	1.27583	0.750539	1.3676	1.04461	1.28873	0.362676	0.880116	0.561809	1.59484	0.944274	0.412393	9.45e-05	-1.01336	down
gene-TFCP2L1	129	123	56	37	54	384	271	342	348	259	27	18	61	92	23	64	12	32	18	78	0.359774	0.367058	0.166765	0.099465	0.167268	1.19371	0.850461	1.10929	1.06558	0.788094	0.071669	0.054316	0.1794	0.285969	0.066112	0.185434	0.035557	0.097687	0.048712	0.219606	5.69e-06	-2.23218	down
gene-KCND3	9	18	15	35	51	71	14	41	37	51	101	110	121	15	162	77	21	36	101	20	0.026705	0.064415	0.05361	0.113019	0.188137	0.268839	0.050733	0.157115	0.132038	0.184087	0.324846	0.401581	0.439672	0.052263	0.59975	0.267264	0.073882	0.13424	0.340747	0.067527	0.0226556	1.20661	up
gene-LDB2	193	65	98	90	187	60	101	120	88	136	368	581	460	391	344	359	318	358	198	350	1.72499	0.620269	1.01784	0.789776	2.06785	0.643161	1.0735	1.29835	0.930778	1.30753	3.42557	6.09544	4.74643	4.12866	3.4585	3.61272	3.20761	3.85223	1.86377	3.38334	5.02e-16	1.76697	up
gene-LOC786948	94	65	17	17	224	142	50	233	78	48	232	236	394	267	624	365	451	132	228	364	2.19135	1.6364	0.413618	0.385294	5.80006	3.68672	1.28693	6.30109	1.97326	1.22087	5.25515	6.04433	9.72551	6.97429	15.4201	8.89868	11.2526	3.45812	5.3285	8.62349	2.2e-05	1.84218	up
gene-NAV3	47	54	69	64	100	35	30	68	59	77	171	231	165	128	131	129	200	146	210	55	0.10955	0.133947	0.18633	0.146946	0.256992	0.089982	0.076152	0.182061	0.148613	0.196076	0.395647	0.617416	0.413525	0.34384	0.321512	0.327312	0.543215	0.380226	0.498041	0.132275	2.6e-08	1.44247	up
NewGene_9389	226	144	192	189	210	173	227	85	78	184	59	29	57	43	19	32	135	187	72	41	1.62814	1.13682	1.51356	1.38086	1.80653	1.43352	1.8402	0.981625	0.856881	1.45473	0.410422	0.222489	0.436349	0.474747	0.194605	0.248464	1.05713	1.84115	0.51859	0.287822	0.00140633	-1.27399	down
NewGene_8031	20	52	63	71	46	52	160	89	65	205	203	284	315	209	145	213	221	153	179	176	0.085625	0.268986	0.32256	0.317703	0.223713	0.291668	1.03611	0.471152	0.330192	1.05967	0.941858	1.46774	1.6421	1.25714	0.759177	1.18085	1.05591	0.762485	0.854745	0.880443	0.000159087	1.35174	up
gene-ATP1A1	5697	8625	7079	7534	7453	8707	2835	7639	7053	2844	2290	2343	2081	2193	2459	1771	1639	1768	1739	1597	38.5599	62.9982	51.7514	50.2176	56.1151	65.6125	21.5378	59.9657	52.1804	20.9777	15.0357	17.4318	14.8918	16.597	17.6087	12.511	11.8533	13.4182	11.782	10.9549	2.17e-19	-1.64899	down
gene-SLC25A33	3030	1239	776	746	745	854	947	1021	1882	956	1012	208	220	336	413	235	337	331	251	165	49.4862	21.8348	13.6886	11.9903	13.5265	15.5191	17.3545	19.3365	33.5909	17.0065	16.0244	3.72011	3.79493	6.12864	7.13099	3.99342	5.87128	6.05237	4.09187	2.72721	9.08e-08	-1.74438	down
gene-SLC25A35	51	68	67	51	96	35	69	36	89	55	80	119	105	89	237	203	94	148	144	131	0.767369	0.930284	0.918244	0.639502	1.36904	0.48677	0.98115	0.578048	1.23694	0.769617	0.995864	1.67877	1.41868	1.27385	3.20743	2.73235	1.28112	2.27587	1.88129	1.69741	5.93e-06	1.20296	up
gene-TBXA2R	47	52	22	25	50	14	15	40	65	42	87	135	74	70	96	68	90	125	43	104	0.520819	0.533954	0.233375	0.238003	0.563141	0.147702	0.159651	0.494841	0.724844	0.433748	0.906097	1.57413	0.805692	0.792731	1.0597	0.819443	0.978475	1.62949	0.531888	1.07804	1.75e-05	1.32842	up
gene-HES6	90	120	83	105	116	106	61	89	93	44	31	39	31	65	35	20	34	36	16	35	1.08963	1.54561	1.02984	1.34609	1.68732	1.42306	0.780941	1.49024	1.2185	0.686943	0.443148	0.43725	0.476531	0.908953	0.549163	0.210987	0.377967	0.518348	0.161685	0.474606	1.1e-07	-1.33298	down
gene-MAMSTR	127	256	218	268	125	192	230	228	188	207	396	673	791	813	690	539	1058	633	446	726	1.48529	3.01783	2.75838	3.05805	1.85404	2.34224	2.80726	3.30442	2.4958	2.86094	4.99777	9.25696	10.4162	11.3379	9.38517	7.12652	14.4062	8.65902	5.10531	8.88117	1.81e-19	1.78471	up
gene-PDGFRB	872	1418	1304	1859	2069	1343	1151	2126	1214	1127	3420	4419	3679	1806	2758	3255	3293	3114	1913	3097	4.07961	6.83619	7.07963	8.44076	10.6019	6.61602	6.36775	11.0918	5.8729	6.004	14.8541	22.0233	16.8754	9.76999	13.4895	14.8069	18.6743	15.3479	8.53633	14.0287	1.14e-10	1.14106	up
gene-SEMA6C	2802	2500	2591	4613	2135	4013	3807	3628	3846	4203	4994	10375	9486	11394	9552	7475	7833	4880	10716	7753	18.0864	16.9902	16.4543	28.4747	14.1221	26.5931	25.9102	26.2533	24.7643	27.4501	30.6111	72.9817	63.9514	77.3861	64.6935	48.2826	53.3941	32.5882	67.3406	49.6304	1.28e-11	1.35832	up
gene-CARNS1	687	731	843	1150	1132	1215	943	1033	876	719	2192	2469	2657	1827	2086	1165	1503	1119	2428	2288	4.16844	4.79076	5.53246	6.78757	7.55203	8.23851	6.31919	7.14493	5.70406	4.80144	12.982	16.3628	17.1135	12.18	13.3906	7.25475	9.62712	7.48475	14.4904	13.8745	2.53e-10	1.13909	up
gene-LRRC2	26857	27201	21541	17808	23490	16251	14775	14676	26054	12141	8883	9490	10987	10228	4156	12459	9972	9616	8589	7590	60.1105	64.4033	52.8342	37.8536	60.554	40.2894	39.9726	38.5328	63.8946	28.932	19.3157	23.045	25.4094	25.1671	10.6687	28.5545	22.3329	21.4339	19.6965	16.8153	8.22e-10	-1.0631	down
gene-VSTM4	196	247	171	252	273	178	233	321	189	272	458	595	651	202	438	455	540	603	449	471	2.11483	2.87787	1.99102	2.70062	3.28667	2.13794	2.82718	4.02358	2.23489	3.20459	4.81264	7.07213	7.45934	2.44771	5.01361	5.14363	6.244	7.32283	4.89384	5.17234	3.28e-09	1.11031	up
gene-PRTG	62	100	55	55	47	62	48	77	117	58	16	47	22	28	12	35	16	7	32	28	0.140897	0.244425	0.135622	0.122948	0.116954	0.156255	0.122287	0.201504	0.289989	0.143032	0.035353	0.11726	0.051874	0.069942	0.028144	0.082648	0.038987	0.016476	0.071669	0.064342	1.18e-05	-1.43696	down
gene-LRRC17	44	19	17	99	89	46	28	28	71	27	356	337	191	106	216	160	163	126	123	121	0.547225	0.255811	0.225077	1.2151	1.23695	0.635945	0.393365	0.39471	0.959546	0.364497	4.32721	4.63011	2.52332	1.47662	2.85887	2.09243	2.17664	1.76479	1.53463	1.5337	3.78e-10	2.0967	up
gene-LRRC15	38	100	81	53	22	106	42	17	54	46	160	318	241	241	181	305	155	131	243	91	0.162868	0.459694	0.374425	0.222573	0.101944	0.502868	0.198755	0.084095	0.249579	0.21179	0.662289	1.49601	1.08901	1.1555	0.821543	1.36483	0.70769	0.62855	1.04232	0.393017	2.56e-09	1.93149	up
gene-ZNF404	30	63	56	97	90	54	43	57	47	48	22	12	17	18	22	34	47	49	27	5	0.38509	0.884041	0.785192	1.25211	1.30823	0.781847	0.625913	0.865048	0.662643	0.680936	0.271551	0.163454	0.233963	0.254645	0.30329	0.454976	0.654969	0.708736	0.344976	0.053173	0.00261181	-1.12992	down
NewGene_6534	117	11	134	90	232	224	129	112	142	161	21	2	7	57	129	31	35	49	28	16	4.45616	0.434628	5.45483	3.21824	9.69413	8.76126	5.47448	4.69725	5.90685	6.62544	0.780412	0.077951	0.271218	2.35077	5.23856	1.16054	1.45134	2.08246	1.02285	0.621515	0.00187577	-1.76203	down
gene-MEOX1	70	90	101	132	222	66	55	183	161	82	225	248	246	294	248	248	166	205	149	217	0.572916	0.792943	0.888703	1.06075	2.02571	0.599999	0.501228	1.73413	1.43355	0.724447	1.78788	2.22629	2.13278	2.68929	2.14163	2.12066	1.45059	1.88292	1.21838	1.80564	4.23e-05	1.02127	up
gene-GADD45G	2539	7164	6111	2647	5521	2966	1201	4036	3204	1179	796	872	1115	841	897	1163	874	1063	990	993	57.6871	175.666	149.969	59.2363	139.548	75.0178	30.6279	106.358	79.5769	29.194	17.542	21.7721	26.7823	21.3777	21.5452	27.5899	21.2088	27.0959	22.5061	22.8736	8.24e-13	-1.85062	down
gene-SOX7	520	423	435	582	374	403	445	347	393	432	722	836	828	656	747	1441	690	1042	412	1052	3.60052	3.16026	3.25132	3.9662	2.87877	3.10007	3.45682	2.78037	2.96824	3.25585	4.84486	6.35848	6.06165	5.07948	5.46988	10.4209	5.10176	8.09267	2.85053	7.38024	1.2e-08	1.00094	up
gene-SOX8	33	97	116	95	51	98	61	99	109	96	102	344	192	233	195	86	95	273	221	170	0.265459	0.839357	1.00482	0.751043	0.452629	0.877773	0.546493	0.920872	0.954839	0.835915	0.796727	3.04802	1.63616	2.09763	1.66233	0.718223	0.81216	2.4636	1.78177	1.38453	9.64e-05	1.21121	up
gene-TPSB2	44	20	25	21	74	140	22	152	25	8	125	131	69	73	391	67	114	18	110	161	0.960818	0.452594	0.583318	0.436829	1.81255	3.42689	0.541937	3.88855	0.579774	0.183665	2.66898	3.17631	1.58907	1.77909	9.11149	1.5314	2.67634	0.436151	2.41866	3.58637	0.0263867	1.31765	up
gene-UCN	605	244	105	140	180	161	86	129	271	67	18	24	15	71	28	38	33	43	49	27	11.9112	5.28704	2.17737	2.69908	3.83593	3.41097	1.80037	2.78672	6.41577	1.3651	0.313993	0.47796	0.679812	1.47019	0.54234	0.867549	0.633897	0.999823	0.906932	0.511387	1.42e-10	-2.42246	down
gene-ACTA2	3472	4006	7263	6952	3654	5011	4129	4397	3588	5470	10962	10351	9574	6485	10696	7693	12869	29241	7248	12555	63.4773	79.0441	143.111	125.055	74.2061	101.887	84.5984	92.8717	71.672	108.613	194.439	208.093	185.031	132.48	206.253	146.938	251.329	597.57	132.749	232.461	9.18e-08	1.34899	up
gene-ZNF827	130	105	98	50	47	106	80	127	120	67	95	157	254	298	120	337	269	138	128	246	0.418355	0.364355	0.442291	0.158962	0.165944	0.380414	0.29035	0.535595	0.442148	0.235596	0.29541	0.557902	1.01278	1.36511	0.431449	1.17874	1.02055	0.497602	0.412003	0.835755	5.71e-05	1.17775	up
NewGene_6380	59	80	42	53	142	94	65	37	68	59	20	18	39	53	10	29	40	54	8	15	0.312204	0.46102	0.2406	0.274815	0.842926	0.560912	0.387477	0.224089	0.395917	0.343929	0.101927	0.104953	0.215618	0.317259	0.055109	0.159961	0.224222	0.319926	0.041767	0.076956	0.00172768	-1.22096	down
gene-CDH6	34	43	58	57	37	39	48	66	40	40	86	113	135	35	52	135	115	171	26	95	0.099419	0.137051	0.18548	0.166812	0.119938	0.127308	0.15969	0.228962	0.248811	0.129208	0.248132	0.380467	0.466422	0.116524	0.161612	0.469768	0.365083	0.573171	0.080218	0.287886	0.000925655	1.09473	up
gene-C1QTNF2	26	41	38	25	30	24	30	37	16	26	253	258	256	94	227	126	142	105	118	118	0.547097	0.933676	0.862422	0.523015	0.704267	0.563113	0.713703	0.902701	0.356601	0.599741	5.21537	6.0182	5.75677	2.22452	5.10935	2.79672	3.21203	2.50156	2.49741	2.53418	1.17e-24	2.57919	up
gene-C1QTNF6	33	57	99	27	71	79	27	117	62	21	488	265	86	115	223	36	76	82	136	172	0.299189	0.555801	0.971325	0.242484	0.714264	0.797839	0.263443	1.23405	0.609702	0.208372	4.31683	2.65628	0.820907	1.16677	2.14877	0.335158	0.727456	0.831025	1.24156	1.57674	0.000626691	1.54212	up
gene-CCDC8	282	226	250	336	479	229	312	302	240	200	698	1341	917	982	792	1119	1061	504	1279	1109	2.62937	2.27754	2.5203	3.08733	4.98371	2.38022	3.26805	3.26878	2.44464	2.02971	6.33351	13.7883	9.06372	10.2724	7.83136	10.9226	10.5985	5.28189	11.9731	10.5088	2.8e-25	1.85043	up
NewGene_14686	58	57	40	34	38	52	35	25	53	69	68	57	79	50	81	92	171	152	75	89	1.05185	1.10437	0.774093	0.610297	0.753025	1.04706	0.700521	0.510105	1.04402	1.3623	1.20277	1.13775	1.52291	1.01256	1.54863	1.73974	3.33225	3.10948	1.3547	1.62768	0.000443728	1.04608	up
gene-FGFR3	71	47	72	140	44	106	36	53	87	82	96	127	217	261	133	175	136	129	78	88	0.369554	0.254968	0.403138	0.716365	0.250545	0.763566	0.202246	0.320628	0.494463	0.44872	0.507594	0.92673	1.20966	1.73441	0.794043	1.02017	0.768509	0.756022	0.404548	0.473707	0.000732726	1.01929	up
gene-FGFR4	39	192	41	183	124	109	104	98	100	56	214	501	468	518	345	251	451	210	443	392	0.296457	1.64785	0.337469	1.41886	1.10992	0.962183	0.912487	0.886918	0.842409	0.460421	1.62739	4.33426	3.90072	4.59307	2.87331	2.1007	3.81391	1.91933	3.50193	3.13381	9e-12	1.94027	up
gene-ZNF570	342	421	321	318	416	337	302	255	404	237	209	155	139	195	38	259	203	180	100	86	1.32303	2.00955	1.4442	1.21238	1.79064	1.45125	1.31168	1.18822	1.70906	0.997548	0.807582	0.659134	0.575755	0.843238	0.155203	1.08728	0.837127	0.781044	0.38698	0.3336	3.33e-05	-1.04835	down
NewGene_14333	62	35	59	100	81	258	214	223	150	186	25	24	96	22	79	16	14	18	24	41	0.219155	0.131685	0.224033	0.350337	0.318174	1.02549	0.857163	0.921229	0.585229	0.722714	0.084555	0.092061	0.361927	0.087075	0.297709	0.058263	0.053377	0.071868	0.085055	0.146975	4.13e-05	-1.91144	down
gene-FOSL2	4104	3467	3444	1868	5677	2035	1252	2498	3356	1032	1250	1560	1524	1473	1626	1214	889	697	1326	961	18.5117	16.5714	16.8938	8.21098	28.6553	10.4644	6.47909	13.1652	16.5975	5.06255	5.84621	7.91627	7.19511	7.51052	7.9915	5.44285	4.29068	3.06014	5.91158	4.61775	1.75e-05	-1.11045	down
gene-MYH11	1104	1625	3019	2562	1180	1332	1613	1975	799	2051	5612	4178	4492	2608	2604	2234	5261	7350	2372	5064	4.14085	6.56186	12.1634	9.45321	4.92097	5.53926	6.77158	8.57148	3.2533	8.37954	20.4208	17.1935	17.79	10.9094	10.298	8.72329	21.0828	30.8195	8.88351	19.2331	1.14e-06	1.31687	up
NewGene_14809	151	168	87	200	239	202	87	129	216	90	130	21	76	28	16	81	104	49	84	32	0.481837	0.577041	0.298403	0.628894	0.84905	0.718008	0.309552	0.47565	0.751372	0.312952	0.402944	0.073768	0.256651	0.097694	0.051477	0.267296	0.354157	0.175622	0.267363	0.100785	0.000619164	-1.27089	down
gene-AQP4	478	473	719	388	523	475	240	390	415	212	1022	397	1172	1067	527	2797	1657	1367	516	1232	2.06232	2.2048	3.35461	1.6487	2.35217	2.13452	1.16308	1.9525	1.96095	0.93158	4.28239	1.88353	5.3557	5.15756	2.41016	12.6264	7.65386	6.1982	2.23226	5.39758	5.77e-07	1.50024	up
NewGene_6273	120	92	105	78	121	47	43	66	79	71	22	37	27	32	21	55	25	46	21	14	1.19065	0.981452	1.12539	0.7636	1.34201	0.521192	0.473694	0.7597	0.854698	0.768886	0.209168	0.40233	0.280183	0.351912	0.219457	0.569731	0.264044	0.513416	0.209361	0.14106	5.96e-07	-1.38848	down
gene-CCDC71L	1092	2018	1854	915	1267	605	705	810	866	454	310	357	364	348	278	413	257	237	328	415	5.33929	10.6464	9.78895	4.40732	6.89228	3.29379	3.86952	4.59125	4.628	2.417	1.46983	1.91807	1.88002	1.89894	1.43507	2.10698	1.33986	1.29911	1.60154	2.05601	8.97e-13	-1.6075	down
gene-KCNA5	1481	464	368	380	569	612	513	446	505	437	167	250	306	250	307	364	209	208	152	398	16.622	5.61024	4.45844	4.1911	7.09952	7.6423	6.46365	5.80436	6.19181	5.34209	1.81086	3.08337	3.62891	3.13974	3.63926	4.26404	2.50147	2.61916	1.6977	4.52032	3.83e-05	-1.08176	down
NewGene_8239	14	8	38	27	19	24	16	18	40	15	52	57	44	26	83	40	11	37	42	61	0.206902	0.124195	0.597768	0.395292	0.300525	0.393037	0.257761	0.307909	0.637638	0.241028	0.749783	0.926686	0.679997	0.420823	1.29922	0.620318	0.173347	0.615063	0.623107	0.908152	0.00559162	1.1052	up
gene-TRIM63	37218	22570	26819	17981	16505	18141	14034	14614	34688	13249	8288	4249	4569	4836	4570	4355	2657	3146	6342	3989	520.814	341.041	405.385	247.848	256.954	282.742	220.512	237.231	530.879	202.095	112.531	65.3637	67.6016	75.6929	67.6572	63.6385	39.7266	49.3754	88.8759	56.5998	2.4e-23	-2.13752	down
gene-PPP1R3D	505	535	277	413	372	256	605	478	553	589	1230	1031	1422	695	662	1099	782	1065	1159	854	3.59274	4.10742	2.12627	2.89	2.94253	2.02537	4.83205	3.94139	4.29436	4.56811	8.49083	8.06193	10.6944	5.52626	4.9779	8.16013	5.94514	8.49565	8.25643	6.15785	1.26e-09	1.1642	up
gene-TRIM36	134	212	78	95	151	71	68	90	133	32	38	43	29	65	46	28	24	47	59	31	0.792687	1.35671	0.497707	0.554702	0.996124	0.470255	0.452763	0.618074	0.86479	0.202421	0.214284	0.275197	0.181519	0.427624	0.284775	0.172134	0.151762	0.30986	0.349578	0.186047	4.44e-05	-1.2812	down
gene-ATP1B2	8	23	22	33	33	23	45	31	18	26	57	72	55	63	96	63	50	39	50	45	0.210778	0.642263	0.624419	0.845991	0.968288	0.660172	1.31644	0.939736	0.510214	0.723687	1.45136	2.08906	1.53444	1.85443	2.67588	1.72835	1.40916	1.13431	1.32058	1.19939	3.26e-05	1.22453	up
gene-LOC526769	560	592	563	196	613	269	519	534	689	331	245	116	212	172	88	195	248	79	197	135	4.92961	5.69828	5.50385	1.65914	6.18211	2.58525	5.13678	5.48949	6.74853	3.22398	2.09871	1.2102	1.95937	1.70737	0.860114	1.8663	2.3713	0.761059	1.83436	1.22677	1.1e-08	-1.47518	down
gene-CCL2	77	136	19	48	118	19	10	67	39	12	69	252	42	306	241	65	48	267	139	79	2.44397	4.69592	0.629095	1.49641	4.18367	0.643249	0.329859	2.489	1.34142	0.409674	2.11779	8.86197	1.3921	10.9421	8.16598	2.17297	1.63966	9.58772	4.43752	2.55986	0.00282712	1.59423	up
gene-PTX3	1903	3295	1929	328	3223	506	79	836	1614	121	54	148	38	26	37	18	22	30	119	106	25.4709	47.6077	27.8958	4.32528	48.0013	7.54163	1.1833	12.9685	23.6137	1.75374	0.698181	2.16859	0.529745	0.374772	0.516925	0.251319	0.308279	0.443534	1.5835	1.42941	2.6e-12	-4.41976	down
NewGene_15756	253	162	60	104	85	87	52	103	165	37	42	20	21	32	33	34	21	31	30	21	2.07928	1.45575	0.429907	0.780255	0.830234	0.858949	0.575586	1.11335	1.43646	0.352889	0.403739	0.190889	0.167101	0.260519	0.273705	0.312737	0.194237	0.293237	0.293644	0.15526	5.34e-09	-1.87952	down
gene-LOC404103	116	27	28	34	158	47	16	84	40	48	131	94	172	62	292	156	240	120	84	94	3.00258	0.745223	0.816113	0.878731	4.68012	1.30421	0.458277	2.51622	1.1434	1.36824	3.37334	2.6863	4.91894	1.82248	8.31247	4.32748	6.93072	3.63672	2.27054	2.51224	0.00103008	1.36966	up
gene-PTGR1	143	185	221	37	198	217	45	43	23	51	218	315	186	49	212	298	340	218	252	200	2.78177	3.90154	4.66061	0.70027	4.29577	4.71389	0.986254	0.959738	0.483273	1.07942	4.12612	6.77001	3.84285	1.06173	4.36723	6.07858	7.10404	4.77313	4.91756	3.95478	0.0213442	1.04935	up
gene-SGPL1	562	726	729	514	1031	451	243	607	698	253	224	267	297	248	420	273	294	173	226	302	3.33369	4.64483	4.67021	3.04053	6.80243	2.96162	1.6068	4.20045	4.58592	1.6253	1.28775	1.73082	1.86938	1.63451	2.65261	1.6998	1.89972	1.14468	1.35261	1.8039	2.04e-05	-1.00699	down
NewGene_12090	38	138	41	119	65	85	72	54	73	78	172	208	148	99	257	132	153	189	142	183	0.315357	1.24221	0.364655	1.02428	0.601997	0.783277	0.674373	0.516197	0.661588	0.70969	1.39038	1.91774	1.37567	0.934082	2.2624	1.14855	1.36071	1.76544	1.18647	1.54584	1.81e-06	1.20885	up
gene-LOC100141258	1844	272	99	198	320	1335	495	794	107	675	61	611	207	65	274	204	139	192	303	388	21.0193	3.33816	1.2171	2.21659	4.05068	16.931	6.32924	10.4922	1.32278	8.37511	0.670015	7.64377	2.49267	0.826483	3.29272	2.41877	1.68382	2.45171	3.45659	4.47625	0.0497292	-1.28293	down
gene-ZMYM3	185	262	216	242	273	189	233	295	183	251	387	533	630	399	467	541	436	262	419	473	0.811988	1.24873	1.02766	1.04738	1.35371	0.923802	1.16037	1.50338	0.87453	1.20338	1.66766	2.5947	2.95138	1.98084	2.19244	2.50283	2.06333	1.29499	1.85347	2.12349	3.09e-11	1.01611	up
gene-MNT	5191	2567	1106	927	1134	1522	748	1030	3346	720	543	411	433	491	556	708	340	167	245	273	26.9272	14.8171	6.28406	4.65962	6.71608	8.94072	4.16352	6.1474	19.0014	4.10062	2.70876	2.31128	2.36884	2.80548	3.06659	3.86862	1.86354	1.00161	1.26822	1.45725	2.65e-07	-2.06439	down
NewGene_2973	42	44	36	26	19	27	31	46	17	42	68	94	141	43	73	121	86	193	104	33	0.696925	0.802845	0.655213	0.424648	0.339418	0.502032	0.570761	0.883396	0.310115	0.764938	1.1052	1.74844	2.52197	0.813793	1.29061	2.12962	1.54306	3.66292	1.75814	0.56282	1.97e-06	1.57544	up
gene-KLHL40	41824	37621	14858	25478	29650	16929	14620	19936	21567	19827	12167	6614	8404	13057	7496	10992	8909	11783	13535	8794	556.716	540.39	213.596	334.006	439.017	250.879	218.496	307.769	313.818	287.664	157.106	96.7594	118.281	194.405	105.569	152.778	126.709	175.938	180.399	118.661	3.11e-09	-1.17079	down
gene-NABP1	373	223	109	240	201	175	134	111	210	116	118	35	56	135	49	83	75	82	109	42	3.56364	2.09051	1.11536	2.22189	2.07674	1.94014	1.51391	1.18792	2.09651	1.09998	1.04573	0.333143	0.531148	1.45434	0.452796	0.770849	0.669917	0.803635	1.09813	0.56561	6.01e-05	-1.18958	down
gene-MASP1	792	446	728	625	286	736	491	349	537	435	969	658	1052	1084	1140	1456	1859	1056	742	1003	5.7844	3.60493	5.53062	4.32162	2.2374	5.87609	4.07604	2.93621	4.26085	3.43244	6.67542	4.88491	7.87189	8.63939	8.37513	10.4812	14.1779	8.68716	5.30809	7.09181	1.42e-06	1.07859	up
gene-TMEM100	185	306	126	308	493	272	164	339	233	218	585	767	548	560	681	516	613	748	318	458	3.07801	5.50115	2.23616	5.05936	9.15733	5.02958	3.05187	6.50412	4.09422	3.92806	9.46953	14.0682	9.57701	10.41	12.0288	8.99162	10.9155	14.005	5.20487	7.68253	1.49e-08	1.20524	up
gene-PANK1	6854	4679	5171	1990	2681	4733	4197	2149	7669	3141	818	438	800	638	583	789	783	518	282	725	44.7667	33.3672	36.4855	12.8401	19.5565	34.6111	30.8069	16.2848	55.0081	22.3096	5.24064	3.17476	5.5583	4.70513	4.04057	5.43099	5.54573	3.79323	2.09549	4.85631	9.36e-30	-2.71818	down
gene-PDE1C	82	103	103	233	101	122	160	143	154	156	297	262	352	316	199	386	236	405	165	187	0.345787	0.379428	0.453199	0.943782	0.383448	0.593999	0.720164	0.643411	0.731287	0.710988	1.23684	1.08574	1.45194	1.38549	0.926408	1.57333	0.917515	2.114	0.656866	0.692328	1.18e-06	1.08819	up
gene-HIST1H2AC-2	2019	1253	881	1116	1122	1823	169	507	1134	307	190	73	91	202	119	348	170	763	362	182	77.4701	52.3837	37.6111	40.9545	48.772	76.7241	7.45435	23.3651	47.0833	13.5683	7.67819	2.8788	3.67431	8.78621	5.1693	14.211	7.50824	31.0328	13.9393	7.19574	0.000128822	-1.95453	down
gene-CXCL3	333	99	57	81	3250	72	133	56	141	77	100	104	91	162	52	16	42	68	62	46	7.86444	2.52412	1.44315	1.87522	85.6117	1.88078	3.52814	1.53603	3.62621	1.96614	2.27523	2.6898	2.25819	4.26746	1.28599	0.371964	1.0421	1.78772	1.46544	1.09692	0.00446397	-2.35529	down
gene-HMOX2	5701	4958	2025	2473	4087	2433	2357	2136	3610	2274	2488	1220	1278	1174	1351	1185	807	1480	1236	1238	79.7915	74.8897	30.6104	34.0833	63.5961	37.8726	37.0324	34.6406	55.2079	34.6957	33.786	18.7599	18.9097	18.3795	20.0052	17.2122	12.0563	23.1944	17.3131	17.5387	1.67e-08	-1.18295	down
gene-NPTX1	152	363	163	132	149	76	141	287	127	102	16	20	18	25	16	36	13	4	13	21	1.8488	4.76184	2.1286	1.57923	2.00558	1.01689	1.91877	4.04235	1.6754	1.34726	0.186194	0.256965	0.22713	0.331618	0.20101	0.446738	0.161929	0.049029	0.147934	0.257455	2.48e-23	-3.16344	down
gene-DLK1	23	12	60	36	67	51	16	0	0	46	1051	144	127	21	595	59	20	86	42	61	0.403882	0.198894	1.18372	0.549587	1.28254	0.969472	0.279303	0	0	0.899896	18.6639	2.74625	2.30535	0.36447	11.3395	1.13359	0.329999	1.72941	0.710707	1.11303	0.00322617	2.87015	up
gene-CA4	262	114	242	473	311	159	169	150	204	167	496	306	461	583	590	754	652	956	240	768	5.78935	2.17202	5.72444	10.2713	6.75351	3.74272	4.21714	3.81421	4.6145	3.42103	10.5421	7.37915	10.6501	14.3099	13.3164	17.3644	15.5181	24.1583	4.42886	16.5954	5.07e-08	1.44761	up
gene-PCBP3	151	281	311	191	348	405	609	509	343	674	326	158	206	75	109	23	66	142	201	88	1.69122	3.42699	3.82627	2.09932	4.35986	5.3025	7.75862	6.61129	4.24452	8.62361	3.65915	1.95742	2.44079	0.927933	1.27174	0.259414	0.791416	1.77743	2.24607	1.04823	0.000260481	-1.44466	down
gene-TLE4	1874	2202	1525	1789	1532	1102	966	1674	1661	1087	750	545	441	756	624	690	595	894	1364	511	9.83255	12.5698	8.4912	9.12706	9.18351	6.56766	5.75677	10.765	10.2546	6.11486	3.97283	3.54025	2.49988	5.48095	4.12385	3.71098	3.35652	5.29749	7.19141	2.79316	9.6e-07	-1.02271	down
gene-METTL7B	571	1101	461	627	1505	305	349	447	160	509	194	141	84	157	105	160	139	25	100	124	8.37776	17.4218	7.29997	9.05084	24.5487	4.97054	5.73332	7.60377	2.55393	8.13961	2.75719	2.26686	1.29684	2.57173	1.62548	2.4414	2.17506	0.403943	1.46394	1.84309	4.9e-11	-2.20754	down
NewGene_15121	57	71	43	68	48	49	35	35	38	26	126	105	50	111	99	199	113	44	76	165	0.710642	1.0497	0.658025	0.918447	0.852887	0.788051	0.662024	0.602337	0.632298	0.413815	1.75089	1.70992	0.608854	1.99468	1.40562	3.05791	1.53133	0.567895	1.12552	2.26659	7.75e-06	1.2784	up
gene-CCRL2	76	126	57	93	53	66	131	120	88	86	327	214	189	129	107	275	257	508	191	148	1.17534	2.64752	1.1887	1.70942	1.05533	1.41207	2.79813	2.60652	1.48179	1.70539	5.95232	4.45228	3.76511	2.72302	2.1386	5.29323	5.21667	10.95	3.66194	2.81863	6.38e-07	1.42582	up
NewGene_4268	83	35	125	61	32	158	58	60	98	34	30	26	43	38	0	34	16	12	41	45	0.31974	0.143764	0.517239	0.229301	0.135716	0.677966	0.2486	0.265271	0.409221	0.139288	0.111463	0.107369	0.172003	0.161373	0	0.13396	0.065282	0.049366	0.155813	0.172739	0.00635636	-1.35113	down
gene-GABARAPL1	7733	6722	8911	5360	5301	7317	3594	4796	10792	3525	2606	2026	2094	2742	1200	4228	2726	4990	3081	3148	99.65	93.4715	124.025	68.0278	75.9794	104.976	51.9885	71.6714	152.021	49.5081	32.5782	28.6859	28.5274	39.518	16.353	56.8921	37.5288	72.1379	39.7537	41.1256	1.13e-05	-1.0908	down
gene-COL4A6	26	28	87	40	81	48	29	47	27	30	113	151	122	91	96	50	71	166	81	103	0.096054	0.108814	0.344535	0.145553	0.330084	0.1961	0.119688	0.200476	0.106295	0.119852	0.402495	0.6119	0.476769	0.375029	0.372526	0.192599	0.27966	0.688153	0.299619	0.384547	1.87e-05	1.29796	up
NewGene_8799	86	110	94	79	28	73	232	26	175	223	254	342	90	153	303	360	200	222	447	263	0.570605	0.786875	0.674253	0.512558	0.207064	0.536819	1.73387	0.196065	1.27182	1.61783	1.63663	2.91969	0.631568	1.13369	2.13362	2.49874	1.41601	1.65779	2.97592	1.77314	0.00268137	1.25365	up
gene-NECTIN1	118	163	67	140	121	142	112	130	170	50	87	49	77	35	66	82	47	2	64	37	1.68692	2.50747	1.03244	1.97378	1.9259	2.25095	1.79765	2.15358	2.65945	0.773678	1.20029	0.764661	1.16596	0.558107	0.993682	1.22327	0.717255	0.032154	0.904401	0.534648	0.00488941	-1.09432	down
gene-KRBA1	71	94	52	89	116	92	141	96	86	158	101	310	379	255	206	191	279	126	201	361	0.259766	0.378051	0.207736	0.328967	0.477533	0.376038	0.590446	0.406438	0.360571	0.636568	0.363741	1.25656	1.49504	1.0464	0.807886	0.738047	1.1381	0.521078	0.745134	1.35024	1.4e-06	1.31907	up
gene-SLC38A4	19	35	60	72	35	51	23	48	67	16	180	60	109	180	32	106	214	111	128	103	0.115515	0.229157	0.396043	0.429042	0.237715	0.342969	0.155422	0.338168	0.444081	0.096056	1.06396	0.401987	1.03851	1.23917	0.200775	0.676737	1.4164	0.759936	0.781958	0.63501	9.71e-06	1.58582	up
gene-ST6GAL1	176	196	109	126	298	129	89	144	149	164	407	470	318	164	296	261	281	223	249	445	0.944524	1.26057	0.627204	0.663914	1.85398	0.768295	0.551124	1.08182	0.870748	0.959352	2.11718	2.77854	1.81979	1.01334	1.72013	1.48852	1.82936	1.34271	1.35467	2.49598	2.73e-06	1.04619	up
gene-LRIF1	1954	2646	830	2012	1489	684	865	922	1321	650	630	529	507	734	258	711	559	770	542	300	11.6642	17.511	5.09815	11.7068	9.72273	4.99235	5.16689	5.77873	8.45816	4.3014	3.25597	3.76542	2.73058	4.90013	1.70699	3.75646	3.26854	4.22931	3.13679	1.87028	6.99e-06	-1.18796	down
NewGene_8057	37	50	36	40	48	16	41	44	51	19	76	95	71	62	86	75	69	196	63	85	0.877151	1.29796	0.944915	0.958469	1.27731	0.43138	1.10815	1.22109	1.33784	0.487775	1.77456	2.52187	1.81888	1.66562	2.21143	1.88288	1.77543	5.32959	1.52491	2.07629	6.56e-06	1.26969	up
gene-C1QL2	106	167	116	116	64	222	99	59	452	82	37	10	9	69	31	103	69	105	62	58	1.57912	2.68103	1.86857	1.70653	1.06302	3.69269	1.65633	1.0206	7.39171	1.32135	0.529924	0.159571	0.140526	1.1394	0.47545	1.60301	1.08822	1.75408	0.920112	0.877326	0.00550352	-1.36	down
gene-AHSA2	261	251	52	138	131	138	74	213	194	126	37	57	42	71	36	55	39	108	53	34	3.53255	3.5989	0.782244	1.97819	2.02402	2.10981	1.2618	3.38021	3.00223	1.9827	0.460767	0.994517	0.575143	1.03158	0.51862	0.831722	0.544717	1.58174	0.689561	0.489896	1.36e-06	-1.49871	down
gene-LOC107131874	147	280	134	331	110	235	134	205	348	195	320	660	526	473	314	243	387	449	405	346	0.808806	1.66757	0.797129	1.80178	0.672052	1.4445	0.832033	1.31393	2.10276	1.17086	1.71572	4.00948	3.07165	2.92473	1.83579	1.4013	2.28655	2.7814	2.23851	1.93588	3.88e-05	1.0188	up
gene-LRRC14B	567	524	453	662	693	703	1106	700	701	913	1574	1521	1918	1421	1705	1518	1093	887	1337	1695	5.01508	5.0034	4.33188	5.77188	6.82558	6.92511	10.9923	7.18026	6.77637	8.80378	13.5184	14.7968	17.9528	14.0673	15.9709	14.0347	10.3401	8.80409	11.8463	15.2138	1.98e-09	1.10019	up
gene-MYC	2691	2247	1318	815	3988	907	407	1930	1248	496	505	716	823	694	499	410	362	949	731	430	29.9821	26.3707	15.6721	8.82746	48.4185	11.1532	5.0549	24.4972	14.7238	6.01329	5.45773	8.83123	9.62332	8.54566	5.88914	4.92504	4.31486	11.9396	8.04512	4.81326	0.000963379	-1.29033	down
gene-KLHL6	536	256	170	148	94	120	149	119	461	131	198	51	22	175	44	98	133	160	52	95	2.29254	1.17927	0.781653	0.622418	0.446562	0.569108	0.715323	0.585371	2.15402	0.607747	0.820853	0.238267	0.09796	0.834626	0.198477	0.435551	0.607228	0.767618	0.21936	0.408787	0.0227147	-1.02253	down
gene-KHDRBS3	248	221	179	301	235	229	167	218	195	159	110	81	99	114	96	102	53	163	80	96	3.69361	3.61805	2.54604	4.38145	3.89063	3.80265	1.7866	3.85454	3.21221	2.70535	1.66615	1.29885	1.19028	1.70792	1.51179	1.57272	0.5373	2.67281	0.910336	1.49359	1.81e-09	-1.04963	down
NewGene_12287	1658	3676	4364	4348	1932	3957	2167	3812	1807	2064	4087	5684	4535	5988	5610	4695	7310	6473	6060	7460	18.759	44.8847	53.3331	48.4509	24.3173	49.8399	27.5252	50.0249	22.3445	25.4535	44.8545	70.6882	54.2516	75.787	67.1562	55.4705	88.3768	82.1543	68.6564	85.5712	4.83e-06	1.02247	up
NewGene_12288	112	219	123	188	111	76	61	115	117	37	286	499	894	373	261	384	172	155	406	107	0.396411	0.838375	0.472357	0.658162	0.439003	0.297773	0.241174	0.472839	0.454543	0.141487	0.983937	1.95034	3.36005	1.48325	0.981594	1.42596	0.651725	0.614751	1.44503	0.384882	1.56e-06	1.67527	up
NewGene_5774	162	200	54	77	134	100	70	95	225	63	60	27	45	35	45	31	52	37	37	14	3.38068	4.51179	1.21027	1.58572	3.11963	2.32455	1.62489	2.28669	5.14188	1.43513	1.21553	0.609726	0.97491	0.800787	0.984928	0.675699	1.14779	0.865524	0.775359	0.285759	8.87e-07	-1.5487	down
NewGene_6948	50	176	100	132	162	70	114	66	43	88	21	14	21	20	18	12	15	12	30	21	0.551985	2.11387	1.19459	1.44348	2.00086	0.864891	1.41745	0.840199	0.519113	1.05578	0.217776	0.165593	0.237688	0.247297	0.207755	0.130111	0.172699	0.149765	0.332603	0.233893	1.7e-15	-2.36651	down
gene-GLCE	449	1089	1609	640	1057	733	389	880	743	354	402	475	445	275	385	405	264	326	275	384	2.11153	5.48772	8.10898	3.57602	5.54809	3.81953	2.04177	4.76589	3.79569	1.81012	1.81383	2.84078	2.31276	1.46112	2.1535	1.99118	1.44304	1.70434	1.51701	1.82573	1.54e-05	-1.06872	down
gene-SLC4A4	1417	688	1512	1244	952	1092	738	1476	1084	509	740	346	229	466	223	475	542	535	870	567	4.41186	2.30736	5.07333	3.80492	3.17059	3.72518	2.57544	5.05242	3.71943	1.63904	2.23128	1.12316	0.715183	1.61674	0.697036	1.46368	1.71017	1.77241	2.70474	1.7868	0.00013437	-1.03557	down
gene-CSRP3	42027	39383	22822	15394	18654	18617	17128	32249	20279	20575	48609	40221	57842	59099	33894	58403	81613	67795	48096	50134	1149.86	1162.76	674.392	414.782	567.717	567.073	526.123	1023.31	606.497	613.601	1290.17	1209.61	1673.4	1808.74	981.138	1668.58	2385.82	2080.77	1317.62	1390.52	7.83e-09	1.20352	up
gene-MEGF6	54	113	55	155	171	77	78	46	75	32	153	259	202	139	184	317	144	39	130	113	0.204689	0.465186	0.225787	0.584086	0.725871	0.327826	0.333375	0.203242	0.311143	0.131466	0.614475	1.105	0.881319	0.594087	0.744158	1.36714	0.589927	0.164351	0.496803	0.438204	0.00282738	1.05224	up
NewGene_13295	124	103	48	95	53	52	62	66	92	121	53	164	207	140	101	122	194	316	150	184	0.729228	0.655216	0.303417	0.553348	0.346383	0.471582	0.406529	0.448485	0.595188	0.778924	0.489641	1.06224	1.29124	0.925595	0.835148	0.751369	1.22771	2.09606	0.896868	1.13218	0.000577576	1.06007	up
gene-OLFML2B	69	262	301	223	530	292	112	480	322	132	575	675	494	509	805	335	523	344	469	471	0.540354	2.46604	2.71305	1.8874	4.79922	2.72242	1.02804	4.60144	3.06082	1.23396	4.62294	6.26439	4.43818	4.82313	7.0889	2.98387	4.67873	3.38385	3.9808	4.00456	0.00156241	1.00897	up
gene-CXCL10	33	183	30	44	33	46	84	51	88	115	107	385	157	211	104	126	148	782	72	94	0.683344	4.12714	0.662902	0.899433	0.767576	1.06101	1.94912	1.22056	1.99956	2.61874	2.16294	8.83468	3.45153	4.9234	2.28933	2.74477	3.30429	18.346	1.50375	1.98448	0.000504831	1.66952	up
gene-GLT8D2	24	146	127	87	137	78	47	133	81	43	365	533	407	223	453	346	308	263	502	190	0.404178	2.66444	2.3168	1.44972	2.58004	1.46722	0.882261	2.60838	1.5005	0.780079	6.00228	9.94771	7.31051	4.233	8.12824	6.12982	5.58884	4.99879	8.54157	3.2609	1e-12	2.06212	up
gene-SEMA3G	929	886	524	1045	580	704	832	582	692	840	2020	1781	1809	1183	1362	1974	1627	1632	894	2098	4.73734	4.87558	2.88383	5.25347	3.28997	3.99909	4.76088	3.46842	3.85864	4.66936	10.0076	9.99022	9.76081	6.75473	7.35245	10.5213	8.87336	9.34465	4.56631	10.8516	5.93e-13	1.15244	up
gene-IGFBP1	121	62	51	26	73	174	94	56	153	82	23	8	12	7	21	36	8	35	24	54	2.05568	1.12918	0.92133	0.423303	1.36971	3.29384	1.7946	1.08777	2.83782	1.51234	0.3748	0.14368	0.215963	0.114232	0.374793	0.629153	0.13348	0.662011	0.399582	0.92584	1.12e-05	-1.92443	down
NewGene_10889	107	69	50	158	73	100	95	102	116	91	30	48	29	58	37	60	58	8	24	27	1.13187	0.787345	0.571591	1.64888	0.85101	1.17053	1.12305	1.2541	1.34618	1.04738	0.301305	0.559739	0.319793	0.680649	0.405367	0.657197	0.652033	0.091726	0.245977	0.285849	5.32e-05	-1.2856	down
gene-FAM222A	268	648	833	861	646	1138	425	456	712	321	123	104	63	85	53	19	37	73	127	143	2.12137	5.79997	7.80443	7.17093	6.128	10.5707	3.90994	4.36458	6.68749	2.95124	1.00477	0.992009	0.578292	0.818643	0.475292	0.137735	0.27765	0.581272	1.08296	1.21149	4.78e-20	-2.86653	down
NewGene_10262	2088	3118	4617	1312	1529	2620	1405	1067	1188	949	664	908	687	477	786	199	412	135	603	182	8.04467	14.0771	17.3169	3.57357	4.87815	9.73421	4.41049	3.50191	3.58755	3.2031	1.80556	2.94995	2.17113	1.3989	2.32892	0.540193	1.40358	0.396884	1.90632	0.500568	4.58e-06	-1.91802	down
NewGene_3080	356	142	78	128	141	176	76	121	226	103	90	40	62	56	32	58	84	101	63	59	2.85449	1.22413	0.672542	1.01068	1.25309	1.57442	0.678194	1.11854	1.97873	0.899766	0.697986	0.350152	0.524346	0.495489	0.26584	0.481618	0.714902	0.901663	0.49948	0.473369	8.06e-05	-1.19272	down
gene-KCNMB4	1782	1062	784	616	946	517	565	898	1270	643	388	356	322	149	229	314	138	275	226	265	11.5605	7.5464	5.45793	4.04401	6.81221	3.77545	4.15018	6.82382	8.84229	4.59251	2.47234	2.50044	2.23588	1.06502	1.57952	2.17216	0.951861	1.98631	1.47246	1.75645	2.89e-14	-1.71438	down
gene-RGS6	99	36	47	54	54	26	31	23	47	42	162	129	146	81	105	117	90	133	97	84	0.409555	0.146516	0.22939	0.212978	0.232711	0.109596	0.156182	0.103165	0.199625	0.250757	0.657037	0.588034	0.635897	0.422871	0.444174	0.549004	0.367286	0.588781	0.38493	0.381168	1.04e-08	1.38127	up
NewGene_10068	402	294	303	288	187	358	78	100	134	85	57	21	40	47	11	82	84	137	55	26	1.40178	1.10522	1.14173	0.989999	0.724288	1.39089	0.304688	0.404527	0.510947	0.320116	0.191162	0.080544	0.14541	0.179925	0.038258	0.297871	0.31138	0.534101	0.191786	0.090616	3.58e-06	-1.91685	down
NewGene_12575	65	177	32	57	145	56	46	76	44	63	0	12	7	26	5	21	50	16	11	10	0.666216	1.96255	0.350644	0.576126	1.66227	0.635217	0.531556	0.89676	0.493279	0.703029	0	0.128723	0.070562	0.294434	0.043627	0.22132	0.543016	0.181326	0.108176	0.100671	2.35e-05	-2.17001	down
gene-PTGDR2	44	58	58	55	60	34	48	36	60	38	86	85	52	63	106	125	82	182	48	121	0.345239	0.494041	0.493849	0.422726	0.527441	0.292792	0.425498	0.328235	0.51337	0.326224	0.658228	0.73394	0.436326	0.558045	0.889567	1.03549	0.689251	1.61761	0.377025	0.967261	0.000142565	1.01702	up
gene-LOC100850659	14	0	20	95	43	18	50	10	40	25	184	324	149	29	166	100	151	46	127	67	0.073899	0	0.109698	0.492188	0.248416	0.100624	0.293526	0.060985	0.226686	0.141098	0.940178	1.89522	0.830928	0.171645	0.927783	0.551965	0.852828	0.269363	0.668823	0.355004	6.48e-05	2.15878	up
gene-UCP3	13962	15229	51888	29752	13000	40759	29434	35989	24552	24113	33340	10478	7951	3937	5072	6055	8997	8535	6562	7898	160.763	190.832	650.514	342.476	167.248	533.204	387.973	483.274	310.773	305.942	381.806	135.795	99.055	52.5019	63.5607	74.4508	113.248	107.941	77.0092	92.9927	0.000340395	-1.4894	down
gene-HSPH1	11997	9578	2821	7203	4877	3787	3172	6755	6483	4919	1186	1207	1504	3919	1238	1980	1980	2490	2107	1305	82.6716	71.3964	21.0155	48.96	37.4163	29.0605	24.5605	53.8871	48.9454	36.9199	7.91022	9.10164	10.9147	30.1704	9.00283	14.235	14.5539	19.1998	14.5354	9.08752	3.03e-09	-1.6195	down
gene-ST8SIA5	109	126	32	58	66	25	75	40	46	58	82	77	181	114	178	170	171	110	95	137	1.26832	1.65617	0.414774	0.700756	0.892139	0.299982	1.03053	0.561908	0.605648	0.71246	0.965416	1.00722	2.1213	1.49383	2.12752	1.94138	2.23302	1.50312	1.049	1.55443	0.000256793	1.12407	up
gene-ESRRG	1097	491	531	521	183	707	803	259	1192	712	207	17	229	200	64	238	377	290	65	168	5.31446	2.47553	2.67674	2.39729	0.947818	3.67583	4.28392	1.4034	6.19145	3.62595	0.934449	0.084891	1.1226	1.04135	0.313553	1.21501	1.94477	1.52077	0.29699	0.794	0.000403326	-1.76961	down
gene-STEAP4	56	71	23	56	33	6	48	36	35	39	306	285	441	99	120	216	277	406	116	181	0.298828	0.410424	0.129451	0.295618	0.196753	0.035823	0.28734	0.220089	0.205472	0.229009	1.60507	1.69562	2.52401	0.594537	0.68425	1.21865	1.6015	2.46649	0.625842	0.988531	1.23e-15	2.65211	up
gene-TYRP1	31	46	5	35	25	27	16	11	37	28	24	29	80	39	81	72	50	49	65	63	0.418252	0.596513	0.063936	0.415824	0.328427	0.360802	0.217357	0.147348	0.493143	0.412138	0.280638	0.431367	1.1531	0.600007	1.1666	0.920828	0.727705	0.670016	0.893704	0.869416	0.00212592	1.15959	up
gene-CIB2	128	385	447	788	690	617	341	668	260	307	76	122	169	98	141	58	115	66	155	106	2.36249	7.44499	8.54706	13.9114	14.1334	12.3114	6.84876	13.9799	5.03015	5.84447	1.32741	2.36405	3.12902	2.02874	2.63569	1.01836	2.2737	1.2575	2.79805	1.97176	7.59e-12	-1.991	down
gene-BANP	1011	843	837	1044	991	1174	680	820	1058	660	395	127	290	578	406	557	404	339	448	348	10.9428	10.01	9.71184	11.209	11.8885	13.8439	8.13949	10.2076	12.1074	7.73203	4.22787	1.51972	3.30037	6.79737	4.72655	6.28087	4.73184	3.99031	4.93976	3.78025	3.03e-08	-1.15855	down
gene-SBK1	70	144	64	96	91	71	142	196	96	192	193	604	704	398	303	329	352	238	388	631	0.35217	0.795465	0.349318	0.488392	0.522447	0.407005	0.807966	1.15886	0.531031	1.06654	0.950319	3.37461	3.77963	2.25512	1.62985	1.74197	1.90782	1.35529	1.97243	3.25328	8.54e-11	1.86442	up
gene-GALNT15	331	334	860	441	1706	1502	376	1025	1013	301	235	564	566	175	575	746	318	151	233	213	2.04196	2.21917	5.72957	2.67842	11.7074	10.319	2.60217	7.33566	6.83141	2.01835	1.40604	3.82117	3.69291	1.20595	3.74982	4.80579	2.09636	1.03903	1.43781	1.32979	0.0354715	-1.00703	down
gene-TRIL	140	267	251	229	228	205	213	227	252	245	629	510	409	359	557	484	371	354	518	582	0.476915	0.984647	0.926848	0.768371	0.866993	0.777797	0.817668	0.896694	0.938511	0.912201	2.0834	1.91404	1.47738	1.37244	2.01478	1.72584	1.35523	1.3555	1.77303	2.01473	7.58e-14	1.13297	up
gene-CSRNP1	5363	2663	977	2066	2901	966	1068	1111	1705	877	660	858	1136	1171	836	993	330	608	1031	345	36.1343	20.2049	7.04357	19.3125	23.8054	7.48908	9.03936	9.33415	12.8962	6.54174	4.98111	6.97717	9.22214	10.7463	6.76623	9.38086	2.32697	3.50508	8.08555	2.80502	0.00174768	-1.21043	down
gene-ACTC1	116	594	320	158	404	206	290	859	86	354	401	1531	11329	914	592	806	996	1288	978	284	2.04328	11.366	6.12206	2.74924	7.95857	4.06156	5.77165	17.6653	1.66302	6.8312	6.89188	29.8558	212.531	18.1287	11.0981	14.9289	18.8804	25.6234	17.3736	5.10445	0.000285319	2.49855	up
gene-OLFML3	388	567	300	313	364	395	305	365	322	248	683	961	806	665	834	518	922	750	677	884	5.41475	8.55088	4.52912	4.30748	5.658	6.14343	4.77921	5.91706	4.92082	3.77049	9.26251	14.7663	11.9026	10.3995	12.3299	7.55513	13.7686	11.7516	9.47275	12.5202	2.41e-15	1.17687	up
gene-G0S2	89	129	199	51	185	85	59	41	93	88	203	305	206	155	227	116	262	180	72	290	2.78019	4.00359	6.22509	1.4511	5.93178	2.71862	1.89096	1.45993	3.21147	2.74531	6.16317	10.3675	6.47836	5.00534	7.48123	3.85726	8.87479	6.29694	2.27256	8.99024	0.00132453	1.05269	up
NewGene_12956	440	200	218	160	323	207	118	221	354	240	119	90	122	98	104	88	98	87	150	114	4.76951	1.94236	1.86829	1.45945	5.5238	2.06534	2.60438	3.50818	2.99638	1.70307	1.73751	1.86528	1.48419	0.713664	0.780394	0.6995	1.16233	0.708709	0.86489	2.54641	2.08e-07	-1.14273	down
NewGene_12957	316	135	67	82	184	136	222	122	310	118	41	40	21	21	16	22	51	41	30	15	1.47193	0.676375	0.335467	0.374683	0.95221	0.706004	1.16386	0.659116	1.57882	0.595884	0.183866	0.203095	0.101755	0.106812	0.078504	0.103733	0.254069	0.214686	0.136408	0.069299	4.28e-14	-2.44613	down
gene-HSPA4L	284	178	90	126	85	64	54	57	91	86	24	28	33	53	15	30	39	52	29	28	0.850774	0.573351	0.290248	0.371095	0.283326	0.210298	0.178999	0.196655	0.298049	0.279327	0.06976	0.089347	0.102349	0.176462	0.044469	0.091954	0.124178	0.173376	0.085112	0.084143	5.19e-07	-1.66963	down
gene-SAA3	86	179	764	326	2212	185	26	148	4	77	61	46	44	14	8	21	105	100	40	63	3.85764	8.6912	37.259	14.4682	111.199	9.29909	1.28933	7.73179	0.189734	3.79328	2.65879	2.26953	2.06374	0.677849	0.341447	0.986135	5.05224	5.03984	1.76961	2.87748	0.00069176	-2.85331	down
gene-RETREG1	28243	10329	10600	16864	5695	6911	11707	10329	25218	11710	12786	3538	4979	6863	3256	5891	4325	9039	5567	2511	212.051	90.5506	93.112	135.849	45.7316	52.0083	91.87	91.538	225.596	96.2017	99.3403	28.8171	37.2888	62.5926	27.3943	43.2922	28.359	61.8593	43.8548	19.7918	0.00289169	-1.17765	down
gene-NR4A2	149	244	116	235	270	249	186	478	257	185	127	379	524	747	586	709	239	84	1273	171	1.26741	2.15228	1.07556	1.91732	2.48328	2.2164	1.78569	4.563	2.34607	1.65739	1.05425	3.44492	4.54097	6.82387	5.05973	6.03176	2.09136	0.832361	10.3815	1.44377	0.0323123	1.10361	up
gene-SYNJ2	3685	2606	1939	2174	1274	1221	1301	1098	3571	882	1125	227	222	252	215	388	289	105	138	252	13.13	10.0335	7.57781	7.64113	4.97851	4.44249	5.02306	4.28067	13.9138	3.14189	3.65873	0.794793	0.76733	0.921568	0.754476	1.4373	1.01748	0.37213	0.448967	0.834068	2.38e-10	-2.57525	down
gene-WISP2	333	174	127	162	293	165	111	75	121	142	311	589	554	273	633	348	437	551	497	477	4.16155	2.00894	1.5108	2.05948	3.8989	2.03966	1.27549	1.17802	1.48784	1.72405	3.84671	7.41582	7.64628	4.07254	7.3912	4.8204	5.8243	6.97747	5.63928	5.94408	1.35e-10	1.5434	up
gene-ZNF750	75	182	251	251	102	323	316	206	357	368	379	787	707	555	757	1078	756	260	1066	545	0.590692	1.56361	2.15452	1.96206	0.903372	2.86341	2.82659	1.90197	3.10435	3.19258	2.92723	6.88515	5.95632	4.94562	6.37493	8.96397	6.43261	2.31989	8.50041	4.39608	1.18e-06	1.536	up
gene-MMP19	60	159	57	90	91	93	23	114	72	67	228	176	247	163	198	63	121	150	148	93	0.655526	1.88689	0.675863	1.02632	1.11974	1.13361	0.280504	1.45071	0.86516	0.800935	2.43602	2.13454	2.92179	2.0082	2.30312	0.719323	1.41858	1.90589	1.63926	1.03952	0.00124049	1.00852	up
gene-MMP17	58	114	23	89	32	81	57	68	62	71	100	222	120	129	134	96	154	156	123	202	0.318706	0.674269	0.134265	0.479218	0.190129	0.490726	0.345312	0.431426	0.367485	0.428477	0.53385	1.33844	0.696508	0.796174	0.78117	0.552316	0.90745	0.962236	0.677478	1.12905	1.57e-05	1.19171	up
NewGene_1330	30	47	62	52	32	45	62	45	24	29	222	61	71	170	50	72	91	6	56	48	0.564478	0.961129	1.25202	0.963732	0.659501	0.954691	1.31351	0.963555	0.474411	0.574684	4.2924	1.27066	1.41286	3.8419	0.997325	1.42534	1.92614	0.126485	1.04653	0.916215	0.027461	1.01847	up
NewGene_11401	3074	1708	3869	3663	3157	1366	1386	757	5710	1127	482	953	2183	2158	301	1077	1134	764	1006	405	8.35774	5.01067	11.3596	9.80771	9.54672	4.13438	4.22935	2.38499	16.968	3.3396	1.27059	2.84637	6.27589	6.56132	0.865677	3.05704	3.29418	2.32944	2.73862	1.11409	0.0110435	-1.22853	down
gene-EFR3B	450	173	203	238	233	82	157	289	144	125	31	108	116	58	46	41	54	68	75	86	1.67336	0.691704	0.814669	0.887252	0.961875	0.33801	0.654546	1.24489	0.585468	0.504161	0.109082	0.441319	0.452453	0.238348	0.178874	0.158721	0.213034	0.281676	0.274118	0.321125	3.1e-07	-1.54594	down
gene-SOCS3	602	759	165	277	976	346	175	809	493	250	262	231	298	228	281	160	212	132	231	199	5.6089	7.63277	1.6802	2.55287	10.1474	3.80045	1.84484	8.74169	5.03581	2.55883	2.50114	2.39087	2.95338	2.44556	2.79265	1.55056	2.12321	1.38367	2.19913	1.89122	0.00109948	-1.03356	down
gene-PDGFRL	108	228	243	180	525	332	204	396	299	158	900	1101	606	357	700	567	448	388	482	347	1.70485	3.89974	4.15689	2.80377	9.28541	5.86144	3.62837	7.29659	5.19485	2.72295	13.879	19.2351	10.1844	6.34614	11.7675	9.40105	7.60125	6.91008	7.67075	5.58989	2.36e-05	1.19512	up
gene-MYOD1	381	1255	119	832	192	266	751	795	346	928	1804	2141	1772	1970	2036	1784	1697	3521	4241	3299	5.01991	17.8487	1.68101	10.7937	2.80544	3.89039	11.1031	12.1497	4.97908	13.3234	23.0671	31.0176	24.7001	29.0387	28.3957	24.5474	23.8917	52.0704	55.972	44.0806	3.88e-07	2.10611	up
NewGene_288	48	125	101	25	161	275	64	61	180	53	72	30	79	20	12	52	4	13	29	24	0.258911	0.733729	0.668125	0.150494	1.02275	1.80615	0.353261	0.342106	1.34866	0.282595	0.380023	0.162147	0.409059	0.108989	0.059463	0.264301	0.021025	0.071426	0.165955	0.117985	0.00096058	-1.68483	down
NewGene_754	22	88	116	72	121	48	51	103	19	39	151	204	152	42	32	102	323	719	97	221	0.14181	0.626177	0.834808	0.466842	0.896628	0.350559	0.376181	0.790889	0.135533	0.283175	0.97256	1.49022	1.06934	0.311243	0.222563	0.704294	2.29707	5.37708	0.645744	1.49257	0.00107507	1.65809	up
NewGene_6701	39	158	59	59	161	56	50	54	100	23	22	12	25	29	12	30	42	39	35	31	0.253518	1.13187	0.419423	0.384992	1.19263	0.411189	0.369592	0.413919	0.72101	0.165346	0.138196	0.084249	0.17026	0.211361	0.083113	0.20505	0.297968	0.289922	0.227614	0.204781	0.000371595	-1.35829	down
gene-SHISA2	3019	2429	1499	2257	2439	1920	2354	2716	1797	1907	3561	6942	4283	2915	5554	3181	3687	4059	4549	4724	28.1571	24.4448	15.0992	20.731	25.297	19.9293	24.6471	29.3698	18.3172	19.3813	32.2169	71.1636	42.2309	30.4057	54.8058	30.9713	36.7421	42.4652	42.4833	44.6654	1.19e-09	1.02391	up
gene-VEGFD	45	89	98	179	151	137	72	68	124	103	289	254	207	138	394	243	223	163	141	99	0.527465	1.15392	1.27236	2.125	2.00541	1.85734	0.941989	0.92778	1.61559	1.34196	3.36924	3.37425	2.63201	1.85928	5.02962	3.04473	2.88267	2.19936	1.69491	1.20087	0.000154609	1.08078	up
gene-FCGR3A	28	85	46	32	151	37	27	89	39	20	122	256	106	70	165	102	146	112	38	56	0.337178	1.15725	0.623681	0.382643	2.16734	0.490815	0.362966	1.25977	0.49406	0.258184	1.46357	3.64559	1.40308	0.961865	2.16999	1.33467	1.95118	1.569	0.497237	0.665394	0.00546521	1.1649	up
gene-B3GALNT2	2370	4637	2227	3029	2885	2343	1408	2186	2300	1221	825	803	1133	1294	942	1265	948	742	1546	1114	23.6244	52.8215	24.2652	30.265	30.4406	27.3033	15.9208	25.09	26.8761	14.153	7.66189	9.43848	12.5365	14.5811	9.84911	13.704	11.1287	7.95757	14.7625	11.2507	1.93e-08	-1.12924	down
gene-FKBP5	11347	19001	26274	12973	16117	18198	13170	15706	17588	11399	3626	5091	5610	3808	3405	4221	3469	2976	4641	3234	72.6165	130.767	178.248	82.0957	112.624	127.698	93.3011	116.497	120.94	78.5235	22.3786	35.7337	37.8355	27.3229	23.3541	28.0448	23.6724	21.755	29.6982	21.3408	1.29e-35	-1.96262	down
gene-ANGPTL2	1831	1110	603	535	833	949	563	2024	987	729	3313	4072	2692	2061	2673	2382	2009	2023	2352	1580	11.9229	7.78296	4.25775	3.45185	6.03038	6.86935	4.06585	15.2114	7.02343	5.25921	20.7613	28.9262	18.4052	14.9622	18.3301	16.1356	13.9564	15.1337	15.287	10.3884	7.17e-08	1.35623	up
gene-FRRS1L	8	31	33	48	39	53	70	29	20	68	89	151	161	83	72	94	38	83	76	49	0.026336	0.109119	0.116271	0.154473	0.142364	0.191821	0.256975	0.107655	0.071744	0.243413	0.282993	0.547716	0.559993	0.304314	0.249119	0.321366	0.132114	0.306092	0.250857	0.163687	0.00176878	1.18522	up
gene-LHX6	148	108	91	168	92	159	76	162	166	66	216	470	342	279	361	229	177	285	122	293	1.40717	1.46615	0.833711	1.35483	0.793782	1.42229	0.679913	1.37834	1.45887	0.522953	1.69218	4.23599	2.88511	2.90113	3.13512	1.84119	1.47726	2.35117	0.936913	2.32937	9.96e-07	1.22446	up
gene-GFPT2	894	1776	933	696	4692	1150	321	1021	1013	351	422	1331	755	394	575	425	361	221	485	231	7.57586	16.2486	8.5411	5.80986	44.2542	10.8539	3.05285	10.0336	9.39069	3.24339	3.46598	12.407	6.76558	3.73327	5.15532	3.75894	3.26326	2.09331	4.11388	1.97978	0.0169328	-1.20036	down
gene-CLSTN2	23	60	58	119	80	75	82	70	76	73	14	18	37	31	13	17	22	23	67	43	0.105603	0.299886	0.290478	0.597712	0.412215	0.407123	0.43419	0.377194	0.408596	0.378414	0.062257	0.088511	0.198299	0.162506	0.061948	0.078924	0.108284	0.119544	0.349544	0.200214	0.000626691	-1.25965	down
gene-CNTNAP1	19	35	9	77	23	31	19	52	18	4	86	87	83	35	52	63	73	66	27	61	0.085864	0.168181	0.041781	0.341666	0.113609	0.154093	0.093664	0.268485	0.086188	0.018981	0.374768	0.428274	0.395694	0.175211	0.248564	0.312719	0.42028	0.333298	0.119823	0.275676	0.00476269	1.20706	up
gene-DDAH1	1557	728	521	294	351	501	476	648	586	608	296	200	217	339	285	283	214	224	162	389	9.93268	4.98586	3.57399	1.83758	2.48038	3.54095	3.39445	4.7725	4.06911	4.21052	1.81871	1.39514	1.45698	2.40195	1.91093	1.87112	1.44784	1.59231	1.0284	2.50007	5.93e-06	-1.20895	down
gene-BACH2	74	132	196	302	57	198	155	152	143	97	149	46	43	35	38	70	55	24	105	82	0.254046	0.489855	0.753057	1.05236	0.217194	0.761211	0.597997	0.620896	0.540217	0.376498	0.500374	0.179697	0.153472	0.134228	0.136372	0.252138	0.20178	0.092217	0.362785	0.283816	0.0016578	-1.17351	down
gene-CLEC11A	27	26	37	35	58	38	27	69	44	6	134	107	83	45	142	60	107	119	73	57	0.478982	0.490796	0.711694	0.616014	1.15572	0.750946	0.542745	1.43228	0.850995	0.110992	2.31853	2.09796	1.5713	0.893567	2.68703	1.1219	2.04826	2.39087	1.30427	1.02474	4.13e-05	1.406	up
gene-ECT2	178	81	103	118	92	84	83	113	140	65	33	84	50	60	15	31	22	50	41	11	1.06597	0.520324	0.666365	0.698808	0.611142	0.559055	0.555986	0.779831	0.922249	0.427038	0.190832	0.555891	0.309115	0.40095	0.094537	0.19393	0.133791	0.336951	0.245619	0.060831	3.88e-05	-1.35696	down
NewGene_10548	47	110	136	52	89	57	69	58	65	36	21	41	21	23	24	27	26	37	28	24	0.632105	1.62655	2.00945	0.702739	1.35575	0.871324	1.06269	0.912019	0.974624	0.535208	0.277557	0.609063	0.295468	0.338586	0.33584	0.384525	0.379757	0.564475	0.373303	0.328655	1.96e-06	-1.33926	down
gene-CKB	106	129	196	43	135	68	34	84	57	50	89	190	177	71	124	65	218	606	67	237	1.86409	2.44744	3.71349	0.739923	2.63815	1.31689	0.655761	1.71569	1.08155	0.952777	1.51284	3.6814	3.28617	1.39569	2.30172	1.18335	4.08791	11.9667	1.17884	4.22638	0.0164524	1.10694	up
NewGene_9858	508	247	975	476	145	979	379	165	466	309	118	47	111	123	46	233	123	69	67	74	7.41734	3.91038	15.4668	6.85592	2.33753	16.0551	6.26187	2.79485	7.44263	4.95819	1.68415	0.734574	1.71789	2.00299	0.688916	3.56532	1.91883	1.1003	0.95815	1.10333	3.05e-09	-2.17452	down
NewGene_9856	678	355	1167	888	306	1128	416	231	671	430	211	74	210	203	69	285	177	80	110	127	2.87034	1.61889	5.33972	3.70411	1.43966	5.31865	1.97848	1.13286	3.10618	1.98246	0.865675	0.343008	0.940323	0.957454	0.306937	1.25754	0.796804	0.376863	0.465251	0.541631	1.59e-09	-1.98235	down
gene-CX3CL1	97	171	212	82	282	84	42	144	49	44	262	330	263	174	299	185	295	213	187	271	0.643247	1.23481	1.53089	0.53669	2.09506	0.620366	0.312578	1.11419	0.354143	0.31893	1.71692	2.42777	1.85615	1.30241	2.11459	1.29511	2.17763	1.69172	1.24903	1.86239	0.000685175	1.12484	up
gene-HSP90B1	24878	11460	7416	11308	10535	9546	5898	10630	11002	7259	5862	4264	3825	6480	3339	4099	5081	5555	4120	3346	220.451	109.581	70.9696	98.6854	103.843	94.1715	58.6772	109.239	106.569	70.1133	50.3913	41.5242	35.8379	64.2316	31.3002	37.9235	48.0994	55.2101	36.5505	30.0559	1.68e-08	-1.1835	down
NewGene_4747	252	578	852	984	428	244	953	740	180	683	935	1376	2232	1494	1603	1259	1154	2321	3048	1910	1.32088	4.39358	5.93108	7.2922	2.51823	1.47284	4.25666	6.4679	1.94974	4.84545	4.98311	8.2788	12.1067	6.22073	7.89301	6.79064	6.37339	9.59744	18.2696	12.2846	4.86e-07	1.61045	up
gene-OPCML	16	4	44	8	10	32	37	9	12	38	41	49	106	12	65	55	15	38	85	23	0.050752	0.014532	0.160741	0.025009	0.037612	0.120065	0.145609	0.043021	0.043989	0.149055	0.140367	0.181095	0.434911	0.045417	0.241031	0.280396	0.104896	0.143167	0.305156	0.08229	0.0273231	1.22876	up
gene-COL27A1	49	58	52	41	57	33	25	79	29	40	171	209	199	111	110	129	185	112	95	128	0.150119	0.193138	0.175157	0.121649	0.196234	0.11338	0.086021	0.283203	0.098697	0.135971	0.525954	0.714183	0.650613	0.390692	0.359078	0.425407	0.615461	0.393597	0.295376	0.402549	4.92e-14	1.69789	up
gene-LTF	554	182	292	111	163	591	280	204	371	266	23	38	10	14	3	36	0	60	8	18	5.55854	1.82397	3.12095	1.01491	1.81786	6.51355	2.97035	2.37527	3.77873	2.73766	0.208001	0.385009	0.088991	0.141736	0.028036	0.346269	0	0.623888	0.074118	0.163886	8.58e-12	-3.82286	down
gene-ZNF274	476	631	413	608	722	576	517	482	722	456	213	161	212	267	235	345	247	223	273	239	4.4898	6.647	4.3315	5.58286	7.49823	6.01743	5.45035	5.20227	7.59602	4.65159	1.92519	1.6475	2.16554	2.88957	2.31822	3.35298	2.46257	2.30221	2.52887	2.23866	3.66e-16	-1.14715	down
gene-PPP1R15A	11051	7860	4229	6937	4763	5357	3954	4368	5311	4658	5149	1176	1870	3929	1831	2973	2803	2888	2672	843	117.663	90.309	48.6246	72.7574	56.4196	63.5077	47.2528	53.9356	61.8128	54.0521	53.1906	13.7658	21.0591	46.7857	20.6099	33.0715	31.8799	34.4896	28.4877	9.09149	9.64e-05	-1.09605	down
NewGene_4536	54	72	25	19	75	42	60	39	53	46	23	37	12	20	12	19	14	36	15	22	0.406686	0.589205	0.203162	0.13498	0.634234	0.355068	0.506461	0.338584	0.43958	0.376464	0.164918	0.305824	0.090693	0.162035	0.088833	0.149513	0.111461	0.306649	0.111943	0.16468	0.000738418	-1.15196	down
gene-FERMT1	234	165	79	65	287	96	73	149	207	93	72	62	72	81	58	60	50	27	73	102	1.0088	0.767153	0.367546	0.273318	1.57971	0.570384	0.353096	0.842416	0.972894	0.437358	0.298697	0.290627	0.325121	0.387685	0.262294	0.270293	0.229747	0.127884	0.314471	0.44529	0.000793205	-1.05841	down
gene-IQCA1	68	20	30	47	16	64	65	31	21	69	49	45	110	169	30	189	61	62	30	129	0.481237	0.154467	0.226372	0.328547	0.127402	0.505579	0.523064	0.252735	0.160659	0.532006	0.337406	0.353911	0.827457	1.35154	0.22732	1.41209	0.460719	0.497018	0.212836	0.935661	0.0246688	1.03802	up
gene-TNFRSF6B	1292	707	53	52	362	130	85	308	327	83	61	31	29	38	28	30	31	24	49	32	31.2732	18.4663	1.36804	1.21773	9.72635	3.50133	2.29896	8.63979	8.65496	2.17014	1.43254	0.822774	0.735147	1.00599	0.71388	0.740151	0.781144	0.639362	1.18665	0.767809	9.72e-09	-3.17015	down
gene-RCOR2	52	19	25	55	21	34	20	24	39	82	57	143	76	93	99	48	86	54	101	68	0.57142	0.21303	0.286676	0.593056	0.248445	0.408866	0.240299	0.294957	0.464824	0.992095	0.606382	1.74769	0.88529	1.14732	1.15996	0.550172	1.02253	0.670997	1.12317	0.758401	0.000493271	1.20665	up
gene-CASZ1	180	553	669	436	517	382	312	749	237	726	1014	1370	920	1345	709	1406	1056	669	1162	1013	0.777364	1.96004	2.4301	1.87875	2.03785	1.8458	1.53163	3.28634	1.10013	2.61989	3.4922	4.96566	4.24824	5.06634	3.28071	4.9133	4.18632	2.31618	3.71979	3.18533	3.01e-06	1.20305	up
gene-TNFRSF10D	1665	955	308	277	1113	542	460	661	731	385	427	429	301	349	212	260	375	289	224	202	8.04665	4.97876	1.60604	1.31434	5.98011	2.91562	2.49538	3.70363	3.85833	2.02816	2.00226	2.27577	1.53683	1.88473	1.07999	1.31058	1.93399	1.56664	1.08231	0.986183	0.000114514	-1.13516	down
gene-RUNX1	1003	2040	239	328	1991	215	86	716	453	134	188	304	240	262	139	231	176	595	445	136	4.32022	9.58599	1.10438	1.41548	9.50863	1.0202	0.410656	3.64235	2.11568	0.623998	0.779313	1.44562	1.10604	1.25191	0.626576	1.05516	0.802195	2.85268	1.90075	0.593052	0.0370279	-1.28133	down
gene-ARSE	21	37	37	4	13	44	22	47	29	21	69	74	35	100	54	7	35	48	71	46	0.226242	0.429026	0.42924	0.042468	0.150822	0.583981	0.289236	0.643393	0.339773	0.259384	0.767679	0.878548	0.399427	1.21692	0.607294	0.070187	0.403919	0.578851	0.767415	0.530679	0.0358025	1.01572	up
gene-MMP23	43	53	34	27	65	71	17	52	32	37	185	133	101	35	77	32	80	125	87	72	0.843513	1.12373	0.625094	0.513828	1.33849	1.55102	0.375378	1.14827	0.623251	0.764249	3.32128	2.79777	2.0592	0.713006	1.53285	0.65837	1.56966	2.57988	1.59936	1.3434	0.000935182	1.1588	up
gene-PRG4	420	718	271	69	718	989	197	3419	1039	421	216	715	362	204	450	147	289	449	320	147	2.16613	4.34404	1.62317	0.379859	4.11597	5.47391	1.08758	21.4293	6.21568	2.15686	0.98573	4.25653	1.81995	1.05832	2.49676	0.770249	1.62997	2.91875	1.73453	0.710405	0.0456275	-1.28763	down
NewGene_9799	105	145	168	103	161	76	160	109	139	122	37	88	69	52	116	38	17	43	91	60	0.787042	1.05213	0.973561	0.503246	1.15596	0.521203	1.21192	0.794754	0.889819	0.915539	0.166189	0.722523	0.410951	0.288799	0.673142	0.184208	0.084396	0.257877	0.479067	0.284275	0.0013865	-1.0083	down
gene-TAGAP	26	74	21	80	32	75	60	75	12	39	93	78	100	215	93	122	88	51	75	160	0.203489	0.632748	0.180284	0.624709	0.281794	0.657155	0.537492	0.690294	0.102058	0.332914	0.716116	0.678045	0.830859	1.91965	0.778956	1.00897	0.743172	0.442315	0.594018	1.29552	0.00200483	1.17453	up
gene-BTBD11	2248	2071	2948	2909	1696	5386	3454	3244	3069	3568	1602	1048	1393	935	755	695	988	452	2529	2219	10.8015	10.9319	16.6007	14.7112	8.91231	29.2879	18.8339	18.377	15.7847	18.4952	8.26668	5.45185	7.78118	5.26166	4.06033	3.55141	5.23525	2.33669	12.2573	10.8321	0.000687747	-1.23793	down
gene-LIMD2	367	265	177	131	161	350	178	159	470	144	72	127	107	77	46	53	91	113	55	40	6.54892	5.19505	3.47028	2.28814	3.29111	7.03939	3.53673	3.27344	9.25726	2.74426	1.28113	2.60678	1.9721	1.5249	0.909407	1.02047	1.70752	2.36143	1.01054	0.724789	1.04e-07	-1.56973	down
gene-AOC2	156	161	64	115	230	125	70	133	178	138	62	59	61	73	75	35	55	43	77	83	1.44466	1.60976	0.635053	1.04699	2.36132	1.28407	0.723694	1.42741	1.79575	1.38942	0.552239	0.593203	0.590831	0.74957	0.728772	0.336444	0.535891	0.437325	0.706475	0.774748	2.25e-05	-1.05656	down
gene-SLC7A8	923	620	2860	1097	614	4097	1053	1224	3904	1245	401	214	266	111	102	76	245	130	252	109	5.65465	4.24327	19.5728	7.05879	4.3239	28.9947	7.7409	8.92027	26.7813	8.48266	2.44696	1.44059	1.70599	0.751918	0.716338	0.478723	1.58407	0.881774	1.52855	0.665917	5.93e-13	-3.18554	down
gene-FIBIN	142	239	197	344	166	249	219	240	203	248	403	396	582	349	581	761	381	522	460	326	0.935572	1.70294	1.40956	2.23948	1.21679	1.83631	1.62778	1.83883	1.46407	1.78983	2.58545	2.8784	4.07547	2.58087	4.0721	5.25859	2.69672	3.87881	3.05056	2.18833	2.75e-09	1.1324	up
gene-CCL21	17	41	32	123	34	29	56	34	9	53	488	330	257	99	129	113	309	80	110	170	0.471336	1.27116	0.991004	3.473	1.07398	0.919285	1.7921	1.11664	0.275438	1.6579	13.595	10.4109	7.81162	3.17202	3.9233	3.36637	9.47391	2.56367	3.1633	4.9383	1.17e-08	2.32789	up
gene-DACT3	25	62	12	28	41	20	64	56	22	30	94	157	134	75	63	62	149	255	59	89	0.212128	0.583078	0.111045	0.237254	0.401925	0.190057	0.630525	0.572782	0.212424	0.287166	0.801495	1.52053	1.2427	0.732408	0.58464	0.565092	1.40526	2.52464	0.51486	0.789522	3.4e-06	1.70714	up
gene-DACT1	170	260	204	208	280	190	178	194	183	197	502	551	488	283	365	428	304	429	404	464	1.131	1.86288	1.47592	1.37478	2.0917	1.42072	1.32544	1.51221	1.32206	1.43985	3.27128	4.0666	3.45449	2.12595	2.59219	2.99621	2.1162	3.22946	2.7	3.15923	3.46e-17	1.08696	up
gene-FBXO15	212	274	126	182	206	167	170	116	190	108	82	101	85	62	57	71	94	79	50	93	3.05992	4.0287	1.89818	2.55895	3.25504	2.61395	2.66459	1.86491	2.95493	1.70366	0.985733	1.54363	1.20611	0.954263	0.792386	0.965389	1.27152	1.28649	0.440697	0.836341	2.32e-09	-1.11209	down
gene-HSPA1A	447813	288625	142995	308788	163270	174348	149602	213734	169964	197539	40255	36444	28884	223799	186549	53452	75882	44832	113042	48757	4467.09	3106.92	1540.61	3033.62	1811.69	1936.3	1675.5	2472.71	1853.37	2147.86	389.542	399.602	304.659	2497.25	1968.84	556.776	808.774	501.678	1129.1	493.049	0.011242	-1.29982	down
gene-LOC787269	4049	3291	2065	4283	2021	2559	780	1403	2272	752	300	142	165	220	80	598	405	1334	277	168	40.7437	35.741	22.4409	42.446	22.6209	28.6721	8.80839	16.3662	24.9958	8.24608	2.92167	1.56589	1.75155	2.47607	0.847568	6.27858	4.3535	15.0532	2.78608	1.70555	1.83e-07	-2.58269	down
gene-LOC100337457	4413	3490	1924	1927	1950	1782	2254	2009	1859	2343	1357	2004	999	785	725	1460	988	670	733	1777	27.8459	23.0168	13.2581	11.4716	13.7626	12.788	16.521	14.6839	12.3267	16.0282	8.08501	14.8891	6.72147	5.64703	4.96351	9.33507	6.32087	4.29128	4.48175	11.3051	1.87e-05	-1.01116	down
gene-MYADML2	2159	1659	1486	1799	1574	2046	2229	1571	1579	1889	4136	4186	4221	4353	4689	4251	3330	2391	4034	4359	16.9804	14.0763	12.6192	13.9361	13.77	17.9133	19.6809	14.3294	13.5756	16.1966	31.5601	36.1899	35.1079	38.3029	39.025	34.9212	27.9845	21.097	31.7695	34.7635	8.98e-20	1.20144	up
gene-MXRA8	101	398	380	324	845	752	268	845	353	300	1306	2491	1640	1097	1843	1008	1228	1128	1045	966	1.10065	4.69669	4.48294	3.48437	10.2801	9.16186	3.29082	10.7188	4.21775	3.57404	13.8607	29.9548	18.9726	13.4247	21.3332	11.5131	14.3512	13.844	11.4509	10.7068	7.48e-08	1.64712	up
gene-CNGA3	16	40	22	37	26	23	14	52	3	13	77	77	159	43	80	43	77	105	53	21	0.097964	0.26261	0.142414	0.223161	0.176011	0.156762	0.095092	0.372853	0.013409	0.080888	0.454466	0.512565	1.04716	0.289301	0.513476	0.269829	0.500683	0.721101	0.326279	0.125289	0.000128248	1.63708	up
gene-VSTM2L	62	46	53	182	92	47	89	34	63	74	194	101	93	144	179	171	138	181	198	116	0.781039	0.618587	0.720156	2.26269	1.28457	0.656951	1.24852	0.492658	0.869346	1.01814	2.36951	1.39587	1.23978	2.02463	2.3831	2.24618	1.85706	2.55187	2.49371	1.47249	0.000114514	1.10966	up
gene-BHLHE41	909	837	996	911	611	1147	1650	1451	979	1756	2121	3339	3016	1680	2279	3054	2497	2417	2267	2484	6.52689	6.48332	7.71748	6.4412	4.8785	9.16669	13.2943	12.0805	7.67713	13.739	14.7708	26.35	22.8927	13.4892	17.3129	22.8977	19.1555	19.4654	16.2981	18.0804	1.17e-08	1.18269	up
gene-DTX1	101	263	113	185	131	99	118	58	147	158	514	499	413	390	556	320	368	306	487	205	0.640523	2.10055	0.794427	1.35007	0.923715	0.695924	0.837658	0.420286	1.01759	1.10996	3.18387	3.62966	2.85997	2.7961	3.74903	2.1741	2.49233	2.17409	3.62421	1.38518	3.26e-12	1.63342	up
gene-PITX3	1041	1343	1930	1036	1404	2137	882	1295	1299	778	427	658	794	495	921	391	595	642	699	607	13.4326	19.009	27.3945	13.7031	20.3308	33.2903	13.1924	19.972	18.1727	11.3991	5.42903	9.95355	11.1738	7.1777	13.3382	5.38037	8.39447	9.90112	9.09655	8.22336	2.49e-06	-1.01175	down
NewGene_5719	113	83	62	55	149	147	57	116	159	87	78	33	31	69	30	30	36	47	54	49	1.10334	0.826874	0.616044	0.497649	1.72496	1.51161	0.641201	1.24218	1.88815	0.869303	0.691753	0.3324	0.294516	0.706214	0.289736	0.286402	0.348552	0.48345	0.499109	0.456147	0.000177104	-1.10859	down
gene-PTGS1	172	185	217	201	527	302	195	199	157	247	493	772	537	247	648	580	386	383	245	330	1.62245	1.88027	2.19507	1.8299	5.5195	3.12337	2.00283	2.07959	1.61443	2.53796	4.48799	8.01908	5.35292	2.60351	6.47749	5.70261	3.8947	4.0592	2.2905	3.13038	0.000100402	1.00382	up
gene-MAFF	20133	7175	4821	7319	4721	6059	5849	4432	10722	5621	4744	1494	1704	2242	2474	2439	1890	2161	1916	1835	224.718	86.4141	58.109	82.8168	59.4069	75.2946	75.6568	57.3713	136.604	68.3778	51.3635	18.3281	20.1085	28.7119	29.2151	28.4196	22.5365	27.0545	21.4054	20.7549	1.38e-10	-1.68403	down
gene-NAMPT	3779	6796	7383	5485	4107	3608	3528	3823	4808	2764	2466	2850	2266	1862	1195	2667	2342	1727	2154	1777	18.6131	36.1584	39.1043	26.691	22.4842	19.7779	19.4917	21.9259	25.8835	14.771	11.7645	15.4221	11.7498	10.2396	6.21593	13.6576	12.3333	9.53963	10.6708	8.83237	4.6e-09	-1.05671	down
gene-IRS2	4174	2975	3266	3618	3536	1755	1783	1417	3196	1408	1322	563	711	1299	1065	1743	850	937	776	708	14.7027	11.3101	12.4271	12.5512	13.8546	6.88017	7.04947	5.78575	12.305	5.40488	4.51804	2.1775	2.64854	5.11749	3.96815	6.40906	3.19876	3.70281	2.73425	2.52766	2.76e-09	-1.36592	down
gene-DOC2G	292	453	261	450	528	344	381	257	594	365	80	114	130	143	324	189	180	195	96	368	4.63819	7.65965	4.41533	6.97286	9.31438	5.99066	6.74881	4.66716	10.1552	6.21729	1.19763	1.92899	2.13258	2.49551	5.3674	3.10683	2.9945	3.50357	1.47903	5.93058	0.000392247	-1.02997	down
gene-TCF15	230	272	197	474	117	310	296	185	174	219	382	434	553	616	491	803	482	761	297	399	5.38539	6.88857	4.99446	10.9473	3.04612	8.09363	7.78817	5.0187	4.46533	5.59826	8.68283	11.1846	13.7123	16.1672	12.1881	19.6757	12.0699	20.0252	6.979	9.49432	3.06e-06	1.12887	up
gene-AKAP7	162	216	220	242	205	125	196	254	158	157	301	640	435	353	231	563	299	366	393	589	1.36013	1.9132	2.00448	2.11476	1.93632	1.28494	1.94657	2.83062	1.46974	1.84841	2.61495	6.0238	4.35041	3.54972	2.26893	5.59035	2.69514	4.11799	3.38253	5.62805	2.76e-09	1.15836	up
gene-CD163	1026	1930	879	594	2874	1009	407	1422	1532	371	418	452	368	217	840	347	374	149	289	157	6.70981	13.6089	6.20942	3.81952	20.9136	7.35249	2.99061	10.7818	10.96	2.64824	2.64004	3.2414	2.53635	1.58564	5.80888	2.36226	2.60163	1.08931	1.88554	1.03645	8.57e-05	-1.63813	down
gene-CYGB	98	201	95	145	241	48	134	153	94	107	461	735	501	280	413	456	458	671	304	460	1.23292	2.71999	1.29472	1.82927	3.43045	0.667243	1.91319	2.2411	1.30727	1.46213	5.70563	10.3159	6.77292	4.00016	5.59184	6.07193	6.24408	9.59315	3.87898	5.95235	1.22e-16	1.91643	up
gene-CRELD2	1316	637	420	543	725	645	333	655	628	410	268	211	197	321	229	188	259	377	216	224	23.8838	12.4691	8.2188	9.70996	14.6285	13.037	6.7721	13.7842	12.4536	8.11444	4.71274	4.19455	3.7705	6.51286	4.38944	3.55919	5.00696	7.66204	3.92081	4.11936	3.81e-09	-1.26433	down
gene-PLEKHH3	136	344	190	274	289	231	319	254	178	238	541	892	1339	859	618	602	759	440	624	937	1.19017	3.12238	1.80512	2.30572	2.83426	2.21479	2.99827	2.6344	1.59258	2.23787	4.59387	8.70737	12.4385	8.38354	5.74435	5.4284	7.2613	4.4571	5.37096	8.49821	1.08e-16	1.68444	up
gene-MAPK4	38	73	67	44	43	59	41	52	38	24	46	25	155	182	114	101	106	74	15	146	0.191246	0.361246	0.401803	0.197274	0.217978	0.342413	0.207993	0.274272	0.189327	0.117539	0.205507	0.12565	0.756544	0.937975	0.556839	0.48423	0.523948	0.379681	0.069183	0.681938	0.0103462	1.06973	up
gene-LOC407145	204	156	113	110	104	98	105	101	150	96	164	346	309	256	298	398	272	100	158	320	1.24427	1.02557	0.741799	0.660584	0.702441	0.661211	0.715705	0.716207	1.00114	0.636882	0.970883	2.32404	1.99823	1.75	1.92733	2.53972	1.77314	0.68462	0.962221	1.97957	1.94e-06	1.14184	up
gene-TIPARP	4703	7047	3011	2376	5879	2875	1255	4472	5921	1183	1052	1410	1645	1167	592	627	569	880	1115	590	30.3299	49.0505	20.9758	15.0901	42.1803	20.6404	9.08176	33.449	41.7475	8.31589	6.5774	9.99069	11.2166	8.41584	4.03581	4.22205	3.91778	6.36233	7.19513	3.85615	5.86e-11	-1.9296	down
gene-LOC112444916	29	40	59	25	7	20	11	32	13	22	75	83	126	68	33	87	54	25	54	47	0.241814	0.352508	0.522643	0.205077	0.062592	0.181812	0.102443	0.309016	0.109407	0.196304	0.600668	0.752541	1.10767	0.625825	0.289903	0.754445	0.480145	0.229348	0.444506	0.389771	0.000572502	1.36959	up
gene-LOC101903647	29	63	62	30	25	28	53	23	33	60	73	50	107	186	41	171	129	68	58	118	0.131434	0.321174	0.308067	0.135435	0.12806	0.140511	0.28262	0.122506	0.16439	0.302113	0.32932	0.27187	0.540446	1.00427	0.203005	0.882509	0.677531	0.355907	0.267338	0.557381	0.000156724	1.33727	up
gene-RBM14	3747	3657	1903	3007	3564	2424	1986	2369	2610	2074	1539	995	930	1813	1353	1427	924	1038	1416	1167	32.7769	34.5554	17.8416	25.8338	34.5078	23.5718	19.5523	23.9688	24.6386	19.7755	13.1004	9.58295	8.61976	17.7468	12.4577	13.0344	8.61565	10.0087	12.4065	10.397	5.91e-11	-1.04077	down
gene-XIRP1	119173	115882	48574	129091	86449	30201	44369	49873	54662	56201	43085	14106	13900	24688	20069	19011	12948	44217	38765	12918	487.513	508.99	207.752	503.903	391.648	133.256	197.631	229.096	236.739	251.177	169.788	62.823	59.3707	109.408	84.1421	78.6113	54.7569	202.534	156.283	51.7807	3.88e-05	-1.4998	down
gene-STAC	322	141	195	203	216	158	121	96	191	130	370	335	288	449	386	406	339	321	304	285	3.15773	1.50797	2.09166	1.95768	2.32852	1.67244	1.30375	1.06647	2.03111	1.38953	3.46677	3.59399	2.93263	4.93518	4.01251	4.1402	3.59068	3.47177	2.97839	2.78105	9.09e-09	1.04825	up
NewGene_13917	173	573	161	142	490	184	99	151	226	100	79	106	102	41	64	62	60	136	165	59	1.05048	4.60847	1.0566	0.918173	3.32636	1.29042	0.67524	1.28001	1.50479	0.733052	0.519595	0.704556	0.655768	0.275446	0.88375	0.393068	0.415189	0.928159	1.0047	0.363441	0.000354983	-1.29532	down
NewGene_13913	1121	194	53	283	110	85	171	201	332	121	8	0	21	36	0	37	4	20	24	0	4.51809	0.660442	0.167821	0.818545	0.358149	0.276334	0.579183	0.805757	1.21082	0.449426	0.022445	0	0.064637	0.117199	0	0.113381	0.012203	0.064588	0.069854	0	1.61e-06	-4.0771	down
gene-CCP110	350	342	333	461	432	427	293	333	506	186	144	148	133	272	91	230	183	130	142	125	1.5266	1.63786	1.55097	2.05903	2.17445	2.2167	1.42114	1.73217	2.42399	0.871983	0.628283	0.703594	0.603995	1.31221	0.414256	1.03761	0.840263	0.631246	0.609749	0.546225	2.5e-08	-1.13082	down
gene-REM1	228	314	348	443	302	287	280	173	250	290	862	744	747	595	746	660	661	923	467	683	3.92556	5.64229	6.11671	7.13238	5.62361	5.29465	5.24752	3.28362	4.49839	5.22415	13.7274	13.5219	12.9862	10.9776	12.9531	11.4837	11.6217	17.134	7.73906	11.5169	9.32e-20	1.33987	up
gene-SSC5D	29	86	112	146	242	240	106	237	115	109	351	572	352	318	663	360	300	155	355	230	0.130859	0.42702	0.551822	0.665636	1.24835	1.24977	0.5495	1.27449	0.581096	0.551756	1.57813	2.94614	1.74095	1.66566	3.28703	1.75929	1.49328	0.805029	1.66525	1.07589	2.29e-05	1.42283	up
gene-DEDD2	1738	1028	410	1032	664	695	562	650	755	567	361	330	402	478	409	418	279	309	320	311	22.5241	14.3778	5.73158	13.1735	9.56987	10.0221	8.1652	9.76697	10.6931	8.00227	4.5342	4.68958	5.49979	6.92264	5.60531	5.65521	3.85366	4.47896	4.14098	4.08326	2.61e-07	-1.08874	down
gene-SEC14L5	177	163	122	117	53	58	110	63	86	158	94	208	690	587	373	393	165	131	166	284	0.87599	1.00862	0.667314	0.562117	0.280875	0.301464	0.683694	0.374036	0.469975	0.995067	0.434211	1.08886	3.53671	3.24286	2.03445	1.97686	0.937113	0.729523	0.889978	1.60627	3.61e-05	1.52852	up
NewGene_2873	103	130	159	137	89	32	55	143	57	32	6	6	61	21	9	71	22	9	14	23	0.594732	1.1385	0.907218	1.07657	0.529223	0.236606	0.683814	1.2267	0.351054	0.385268	0.071002	0.050889	0.544886	0.254993	0.053303	0.443812	0.135481	0.115554	0.070587	0.151214	0.000109828	-1.90552	down
gene-NOSTRIN	323	652	668	336	658	381	348	335	516	354	323	217	144	148	80	287	228	342	115	123	4.39954	9.51564	10.005	4.20352	10.1908	5.44719	5.45256	4.93592	7.56231	5.32273	3.98869	3.28793	2.09544	2.24043	1.07144	4.09212	3.09208	5.26812	1.45524	1.59901	2e-05	-1.13654	down
gene-SPTBN4	235	81	36	41	75	189	125	96	208	76	201	22	38	19	44	19	22	23	31	31	0.734027	0.246362	0.107509	0.113232	0.235368	0.593012	0.419505	0.315023	0.642019	0.234492	0.550799	0.065667	0.111928	0.059446	0.128873	0.053891	0.064749	0.072258	0.087238	0.087403	0.00913422	-1.3474	down
gene-SERTM1	210	117	357	167	428	351	136	509	261	114	100	159	145	95	113	54	60	49	162	136	1.5203	0.910239	3.06492	1.25873	5.0455	2.83386	1.10159	4.28404	2.17286	0.897885	0.700404	1.2687	1.18441	0.783769	0.861597	0.408878	0.465398	0.39748	1.23963	0.995028	0.000295507	-1.24288	down
gene-FBXL22	127	165	172	133	162	110	94	140	79	82	307	273	264	333	229	376	390	366	248	364	2.2959	3.22026	3.3558	2.36579	3.24314	2.20292	1.90166	2.93019	1.55366	1.60415	5.37186	5.4215	5.03658	6.73071	4.38062	7.09404	7.52232	7.42747	4.47748	6.66952	5.44e-17	1.38288	up
gene-FLT4	69	51	113	72	97	50	67	72	52	51	210	216	243	87	237	106	208	58	160	128	0.288321	0.229092	0.511548	0.296324	0.452376	0.231737	0.316063	0.346481	0.237341	0.231005	0.852173	0.9964	1.07448	0.406228	1.04764	0.464444	0.928381	0.271106	0.673083	0.542865	2.36e-06	1.313	up
gene-RIOX2	303	489	296	418	404	313	277	441	471	282	809	734	825	566	655	727	606	573	1010	666	4.04493	7.05537	4.2472	5.53242	5.97893	4.64704	4.13971	6.86752	6.87338	4.13467	10.5651	10.6893	11.7261	8.47266	9.28292	10.1581	8.68143	8.25183	13.5655	9.0612	1.3e-12	1.02109	up
gene-SLC46A2	74	113	100	65	65	91	72	62	100	74	56	7	29	42	35	19	10	6	14	21	0.790564	1.30821	1.15799	0.685403	0.771178	1.08444	0.867939	0.771361	1.17538	0.871063	0.580889	0.079373	0.325232	0.503915	0.390764	0.209128	0.114731	0.071384	0.144969	0.228154	2.35e-06	-1.72572	down
gene-HIST1H2BL	56	51	44	85	92	98	116	68	132	80	19	18	20	36	18	34	42	17	36	10	0.521887	0.515941	0.437892	0.78276	0.954599	1.02031	1.21396	0.732129	1.3467	0.808198	0.170712	0.181638	0.190507	0.371055	0.170762	0.327274	0.416854	0.170318	0.330359	0.089291	1.22e-07	-1.66048	down
gene-LOC112442278	66	180	38	134	178	57	52	239	52	53	20	20	22	15	40	26	73	114	30	43	0.572443	1.68482	0.356146	1.14255	1.71749	0.544863	0.49962	2.40371	0.486513	0.499215	0.167283	0.183492	0.19941	0.143251	0.364366	0.23243	0.669687	1.11008	0.257154	0.373743	0.00748688	-1.28532	down
gene-FZD5	120	207	100	104	208	89	68	97	110	63	67	47	39	38	16	49	32	34	48	21	0.417575	0.781113	0.376669	0.35939	0.830575	0.34684	0.265591	0.391638	0.430356	0.239155	0.227802	0.181104	0.144039	0.14696	0.056308	0.179278	0.118503	0.132079	0.167974	0.074323	3.75e-08	-1.50439	down
gene-FZD3	243	252	130	170	175	113	140	209	123	103	77	73	118	113	51	91	85	69	56	50	0.463319	0.512549	0.262838	0.31503	0.365889	0.236079	0.294588	0.455377	0.252733	0.209995	0.140613	0.14954	0.233391	0.236606	0.100446	0.178302	0.170807	0.144079	0.104455	0.094662	5.22e-06	-1.02098	down
gene-DIO2	515	772	279	454	607	375	314	653	832	230	118	194	129	132	47	67	94	167	120	67	2.00589	3.2482	1.17489	1.74342	2.63231	1.62486	1.37166	2.94971	3.5435	0.976617	0.445072	0.829987	0.528948	0.573353	0.190576	0.270709	0.390698	0.727317	0.464727	0.261698	6.5e-15	-2.08047	down
gene-TLL2	18	47	11	62	21	26	40	24	41	60	49	129	102	81	50	29	87	73	95	85	0.072983	0.204644	0.047902	0.244204	0.090665	0.115658	0.18223	0.108368	0.180266	0.262955	0.191397	0.575498	0.434753	0.363601	0.214021	0.122715	0.374743	0.33097	0.383294	0.348308	0.000963379	1.20988	up
gene-VCAM1	89	164	272	168	485	102	98	101	115	88	525	774	401	319	552	453	304	335	436	354	0.862703	1.71076	2.80937	1.57098	5.19094	1.0787	1.07294	1.11767	1.1922	0.918057	4.91573	8.19904	4.07827	3.4093	5.60549	4.54772	3.10667	3.65833	4.20412	3.43946	6.24e-07	1.49435	up
gene-LAMB3	48	59	110	105	144	165	129	21	86	214	131	364	283	408	248	309	144	52	145	112	0.236128	0.314371	0.697055	0.570855	0.88666	1.01508	0.715202	0.133664	0.462946	1.29251	0.693312	2.22631	1.75453	2.66173	1.50801	1.87769	0.848701	0.284696	0.805314	0.603614	0.0143116	1.0548	up
gene-FAM110C	502	346	319	166	296	364	227	152	392	223	140	168	139	135	141	126	155	122	104	121	2.75453	2.04656	1.88964	0.896944	1.80694	2.22213	1.39484	0.965911	2.34956	1.32963	0.744416	1.01037	0.803861	0.8246	0.816489	0.719622	0.905083	0.746261	0.568182	0.670599	1.63e-07	-1.08297	down
gene-MKL1	942	1008	790	1207	1363	1255	1169	1271	1080	1045	2433	2472	3436	2148	2358	3104	2108	1079	2774	3094	5.11632	5.90117	4.67592	6.46464	8.21911	7.67056	7.29629	8.03801	6.495	6.26023	13.1427	15.1205	20.0469	13.2453	13.7439	18.0085	12.5107	6.53963	15.5062	17.0932	1.21e-13	1.21964	up
gene-HMOX1	4981	3067	2641	1504	2137	3229	1640	1514	4739	1504	1291	606	839	1484	776	1141	817	1041	565	889	78.7878	52.3467	45.1216	23.4287	37.5945	56.8582	29.1123	27.7746	81.942	25.9282	19.8004	10.5336	14.023	26.2557	12.984	18.8424	13.8047	18.4731	8.94063	14.2431	7.99e-09	-1.45216	down
gene-TMEM82	64	41	41	88	75	130	86	43	67	79	43	16	38	22	12	13	24	40	30	22	0.838649	0.576168	0.567497	1.13192	1.09342	1.89078	1.26367	0.640037	0.958669	1.12074	0.547586	0.226732	0.522557	0.317274	0.157405	0.172168	0.322784	0.587855	0.388894	0.286466	1.34e-05	-1.41263	down
gene-ANGPT4	37	109	49	62	105	57	30	85	18	53	190	271	288	105	242	204	186	143	163	188	0.326492	1.04836	0.466375	0.539903	1.03706	0.56441	0.291929	0.871165	0.172299	0.514174	1.64001	2.66098	2.71814	1.04654	2.28054	1.89673	1.7745	1.42706	1.45359	1.69426	2.05e-10	1.77772	up
gene-EEPD1	1183	1829	1519	1331	1716	1097	1352	1119	1630	1308	3191	3402	3329	3338	4313	2721	1976	1383	3035	2877	10.7024	17.8259	14.7723	11.868	17.2021	11.0037	13.6981	11.7008	16.0959	12.8548	27.9587	33.7546	31.7723	33.7713	41.2401	25.7178	19.0854	13.9978	27.4522	26.3376	3.61e-11	1.13351	up
gene-RSRP1	2000	1996	1599	2132	2089	1804	1833	1384	1918	1827	951	566	659	1017	764	714	800	1471	971	419	29.5918	31.2124	25.823	33.3508	33.4873	33.9733	34.7145	24.8898	30.5261	29.2165	13.8725	8.99347	9.49659	19.0666	13.369	10.6703	12.7121	22.5611	14.3345	6.68	2.76e-09	-1.08982	down
gene-CA12	134	291	34	66	147	38	491	42	101	320	34	18	32	68	107	106	106	32	22	72	0.738579	1.86128	0.197761	0.358987	0.914939	0.233973	3.22398	0.265297	0.60855	1.99091	0.178142	0.105545	0.18678	0.415672	0.621577	0.615467	0.623961	0.198359	0.119701	0.399091	0.0097893	-1.44166	down
NewGene_9067	2818	4577	5470	2694	1821	3551	2827	2683	3763	2229	451	980	1303	1098	627	1493	1031	975	954	980	11.7022	22.9881	25.0038	11.5879	13.0807	16.9818	10.761	12.8716	14.7503	8.90942	1.72788	5.07472	6.90472	4.69473	2.64363	6.03662	4.66853	5.25243	3.89754	4.45999	1.37e-14	-1.66552	down
NewGene_11660	130	97	38	52	201	94	42	96	90	45	49	36	40	42	18	40	20	60	41	22	0.796944	0.636986	0.245913	0.31134	1.41565	0.640152	0.288794	0.678095	0.601042	0.2962	0.287744	0.237727	0.253083	0.287821	0.111878	0.252963	0.130992	0.409004	0.251453	0.136847	0.000525925	-1.18733	down
gene-TENT5C	3567	2660	664	1921	1412	1196	819	1957	1342	1338	430	371	606	637	509	441	456	610	865	440	15.3133	12.3324	3.07469	8.11627	6.79045	5.71267	3.94459	9.74166	6.29498	6.25802	1.78962	1.74893	2.76541	3.07914	2.31097	1.97639	2.09188	2.93389	3.71701	1.91427	1.16e-09	-1.56753	down
gene-SLC30A3	249	242	176	241	318	252	142	143	299	121	134	72	87	71	181	65	126	100	79	74	1.97163	2.83897	2.2985	2.88431	4.17215	3.37733	1.947	1.8589	3.62806	1.46649	1.55744	0.982544	1.14571	0.981705	2.33258	0.837386	1.6584	0.586852	0.924889	0.856384	1.57e-05	-1.05712	down
gene-MGC138914	245	182	744	212	48	215	116	171	76	83	79	377	165	2858	122	858	253	544	249	1527	1.93443	1.54706	6.58233	1.64636	0.421953	1.89132	1.02697	1.56517	0.649357	0.71458	0.602691	3.27057	1.3763	25.2685	1.01934	7.07822	2.12853	4.81556	2.04255	12.2345	0.0146562	1.80484	up
gene-PTI	119	53	66	51	175	82	40	161	31	41	438	298	468	344	806	484	697	310	318	380	3.31715	1.5984	1.9815	1.38834	5.45014	2.55435	1.22847	5.20282	0.920287	1.22786	11.8946	9.16357	13.8509	10.7722	23.877	14.1487	20.8403	9.71829	8.89929	10.7894	1.31e-16	2.55484	up
gene-KLF15	2513	2291	1950	1287	2305	1633	1893	1113	2564	1565	1187	730	554	608	946	864	576	782	471	387	26.8674	26.4285	22.514	13.5445	27.415	19.429	22.715	13.8002	29.9585	18.2358	12.3043	8.57958	6.25583	7.26721	10.6862	9.6334	6.57193	9.36526	5.03421	4.19345	4.11e-12	-1.37085	down
gene-SFRP2	52	117	242	204	160	72	64	91	65	56	280	378	343	146	260	291	354	725	101	477	0.640667	1.55387	3.2237	2.46958	2.18446	0.986024	0.879089	1.3023	0.866707	0.741816	3.34272	5.12059	4.4702	2.01285	3.38438	3.73851	4.65796	10.0349	1.23704	5.95763	3.13e-06	1.65096	up
gene-DNAJB4	23974	28873	12588	22368	15399	10404	12234	12861	15995	13133	7213	4186	5522	13428	3028	7947	2424	15127	9624	3109	319.708	411.173	191.699	306.758	226.828	151.827	189.991	212.162	240.285	188.23	96.4969	58.0194	74.9171	209.952	43.9952	106.93	55.1343	164.651	130.442	41.3524	0.00319234	-1.15191	down
gene-DNAJB9	9871	4707	3401	3829	3521	4151	3369	3682	4355	3937	2180	1853	2043	2006	1457	2070	1923	3167	1710	1945	100.906	51.9525	37.5776	38.5689	40.1234	47.2686	38.6899	43.6702	48.6969	43.9145	21.6523	20.8513	22.0993	22.9796	15.7947	22.1262	21.0489	36.48	17.5363	20.1947	1.07e-08	-1.07753	down
NewGene_2937	317	37	29	45	76	57	157	101	86	111	75	20	16	16	5	16	3	6	17	4	4.13011	0.515103	0.403713	0.56969	1.09132	0.814321	2.28892	1.51915	1.21832	1.5713	0.936403	0.276427	0.215855	0.222131	0.065897	0.21108	0.041767	0.077178	0.21258	0.044383	6.76e-06	-2.50011	down
gene-SLC16A6	4584	5596	17113	12319	4402	14662	4366	6703	8660	3260	2473	1387	1436	1040	1005	1141	517	311	3259	1436	59.6014	78.5134	240.313	157.746	63.6561	212.243	63.7244	101.08	123.084	46.1965	31.1864	19.8148	19.7362	15.1129	13.8158	15.4881	7.17148	4.52886	42.4301	18.9272	5.15e-08	-2.48915	down
gene-SLC16A9	40	31	93	62	64	98	32	43	84	39	74	59	18	11	18	8	22	8	24	31	0.24335	0.204178	0.615199	0.372807	0.435605	0.669298	0.217891	0.306076	0.563203	0.259008	0.438568	0.396613	0.112843	0.071026	0.115873	0.050857	0.140836	0.054912	0.14766	0.190679	0.0226387	-1.06303	down
gene-RBM3	286	480	398	416	401	246	321	386	381	252	1186	1535	1144	422	798	642	404	766	938	920	5.93389	10.689	9.09514	8.69015	9.36839	5.58077	7.6536	9.30443	8.46095	6.30734	24.0373	35.0298	24.7605	9.65163	18.5891	13.9326	8.80677	17.7027	20.2811	20.4329	3.6e-10	1.34945	up
gene-PTPRF	509	440	301	286	463	212	125	237	329	93	213	145	95	83	124	113	110	72	159	162	1.64653	1.53571	1.05075	0.910161	1.66595	0.762615	0.453678	0.888901	1.16534	0.326668	0.668918	0.514486	0.322562	0.300419	0.42247	0.38033	0.379605	0.261578	0.515789	0.531677	6.97e-05	-1.14403	down
gene-ELOVL7	688	297	417	259	453	211	153	348	509	230	107	128	114	50	81	103	68	81	77	94	4.76836	2.21521	3.12126	1.76354	3.49399	1.62283	1.18961	2.79749	3.85325	1.73116	0.717713	0.971462	0.833824	0.387059	0.588291	0.740166	0.497542	0.626604	0.528986	0.657635	8.34e-16	-1.91739	down
gene-SLC38A3	48	42	56	89	54	132	108	57	69	74	141	205	157	116	176	177	145	113	208	170	0.399926	0.379612	0.503698	0.829373	0.691223	1.70131	1.03541	0.555129	0.985437	0.815571	1.14612	2.54587	1.96757	1.2349	2.13633	1.81019	1.53806	1.31082	2.74905	1.89781	1.25e-06	1.18522	up
gene-ISYNA1	253	251	247	383	227	253	331	206	213	258	522	569	839	747	660	815	679	1144	485	909	3.41492	3.64839	3.59988	5.08965	3.39628	3.80056	5.00693	3.21157	3.13807	3.7825	6.82737	8.43917	11.9766	11.2749	9.41575	11.4771	9.78683	17.3156	6.54287	12.4342	2.85e-20	1.54598	up
gene-ASB5	115679	82011	44312	81153	58002	41064	48292	40382	66706	59922	59639	18370	22653	33446	18428	27656	25815	52899	24502	19587	988.518	756.26	408.971	682.974	551.339	390.671	463.318	400.208	623.116	558.135	494.388	172.548	204.682	319.699	166.608	246.775	235.699	507.093	209.648	169.671	6.15e-05	-1.00934	down
gene-TM4SF18	822	212	85	157	128	68	125	142	239	194	87	50	58	91	89	45	70	64	42	103	17.7031	4.85897	1.96205	3.42393	3.16003	1.60406	2.93638	3.55142	5.68411	4.46597	1.79531	1.15354	1.28663	2.16201	2.07828	1.00512	1.61753	1.51407	0.893998	2.20113	8.38e-05	-1.55358	down
gene-SERPINE2	6328	3744	1740	2193	2889	2939	2066	2847	4038	2431	1326	1022	1518	1093	1126	943	1038	1659	1367	1097	74.6808	47.5873	22.1696	25.4356	37.8556	38.542	27.3201	38.916	52.0131	31.2122	15.1761	13.2331	18.9618	14.3908	14.046	11.5993	13.0853	21.9165	16.1234	13.096	1.03e-10	-1.28833	down
gene-CXXC5	843	882	852	923	760	896	1079	1113	936	1181	1594	3018	2502	1816	2232	1580	1724	1797	2312	1639	8.11388	8.90698	8.51928	8.70285	8.09248	9.67388	11.7559	12.5492	8.86239	11.282	14.7731	32.0157	26.3671	18.8223	22.3985	15.0791	17.3264	18.8867	22.5878	15.3388	1.49e-13	1.14005	up
NewGene_9657	17	25	3	18	49	29	7	57	21	15	87	43	78	40	132	101	111	27	85	32	0.480717	0.768183	0.068217	0.484593	1.55594	0.903045	0.213604	1.90012	0.648475	0.451998	2.42687	1.34042	2.37326	1.25886	4.00628	3.0269	3.4065	0.867901	2.44824	0.908279	0.0002578	1.68851	up
NewGene_4813	110	77	110	131	47	144	184	92	83	122	150	223	278	464	216	268	247	282	206	273	1.65585	1.24053	1.77937	1.948	0.776887	2.40672	3.11266	1.59603	1.37064	2.00716	2.18494	3.69092	4.43661	7.84196	3.43911	4.21374	3.98519	4.76757	3.10304	4.16753	5.19e-07	1.2851	up
gene-NRIP2	18	99	31	55	12	40	56	88	33	54	340	260	524	159	246	321	521	642	193	445	0.16779	1.00087	0.309242	0.508724	0.124383	0.408823	0.585303	0.951593	0.332404	0.548194	3.09872	2.68494	5.21472	1.67118	2.44477	3.14677	5.22997	6.77479	1.81146	4.23965	3.52e-18	2.94528	up
gene-LONRF3	4157	3207	2207	2072	3278	2281	1525	1879	3246	1458	1302	772	660	994	782	867	824	983	1130	538	14.9906	12.1442	11.4451	10.4647	12.4024	12.8943	8.95729	8.55045	12.6674	8.58574	6.44161	3.33774	3.31818	5.70847	4.58992	3.76508	4.34666	4.97722	5.66918	3.01871	4.92e-14	-1.4382	down
gene-CYP19A1	114	95	79	101	31	47	40	73	63	47	6	43	53	28	21	6	16	57	12	33	0.540066	0.486652	0.403886	0.471211	0.161313	0.246991	0.212975	0.402595	0.324415	0.240325	0.025183	0.223841	0.267036	0.145281	0.103912	0.029828	0.079748	0.301297	0.056961	0.158734	0.00425771	-1.26324	down
NewGene_9872	12	40	78	26	56	53	111	46	75	59	11	16	75	32	19	52	23	8	11	19	0.111736	0.421055	0.782933	0.238276	0.573805	0.540884	1.15995	0.494485	0.83099	0.594668	0.09422	0.156789	0.758482	0.326001	0.186768	0.513824	0.219906	0.075193	0.098869	0.176935	0.0362525	-1.0547	down
gene-SPAAR	626	443	462	382	159	233	261	222	424	346	114	147	8	111	100	309	29	164	163	253	9.68968	7.39636	7.72238	5.81732	2.73572	4.0195	4.54079	3.97937	7.17042	5.83037	1.70763	2.49119	0.117954	1.91877	1.63312	5.00128	0.468149	2.83969	2.52039	3.96586	0.0109933	-1.29252	down
gene-FAM212B	50	89	67	203	43	57	63	100	44	66	104	126	174	196	122	237	193	153	91	142	0.833364	1.61861	1.20827	3.38161	0.800391	1.05982	1.19251	1.94939	0.810754	1.21792	1.69334	2.34121	3.10507	3.69673	2.18228	4.1913	3.48724	2.8926	1.54022	2.43095	0.000540801	1.03889	up
gene-NR4A3	39144	6538	884	3287	956	3044	3321	3260	20952	2289	9638	171	316	1169	311	830	153	243	1142	173	170.528	30.6533	4.13157	14.1196	4.6349	14.937	16.0965	16.4924	99.566	10.8801	40.7017	0.816209	1.45345	5.69127	1.43156	3.77701	0.679807	1.14003	4.98936	0.734061	0.00911661	-2.53469	down
NewGene_12240	91	108	34	75	257	91	74	103	122	70	29	9	56	44	27	16	33	29	41	20	0.541057	0.74721	0.106249	0.446705	1.26489	0.432971	0.472737	0.565563	0.703701	0.443681	0.208202	0.058916	0.363857	0.157024	0.093238	0.046764	0.194783	0.181716	0.201804	0.084317	2.49e-06	-1.66404	down
[truncated: 110 more rows]

## Sheet: Table S9
Table S9. GO enrichment analysis of DEGs in the L_SU vs. T_SU comparison
[truncated: 91 more rows]

[truncated: 30 more sheets: Table S10, Table S11, Table S12, Table S13, Table S14, Table S15, Table S16, Table S17, Table S18, Table S19, Table S20, Table S21, Table S22, Table S23, Table S24, Table S25, Table S26, Table S27, Table S28, Table S29 …]
